# Supplementary material for: Nickel-catalyzed tandem conversion of paraformaldehyde : methanol to hydrogen and formate/chemo- and stereoselective hydrogenation of alkynes under neutral conditions
Source: Royal Society of Chemistry journal article supplement (doi:10.1039/d3cy01699d), 2024-01-01
Supplement: d3cy01699d1.pdf [file d3cy01699d1.pdf]

**Nickel catalyzed tandem conversion of paraformaldehyde:methanol to  
hydrogen and formate/chemo- and stereoselective hydrogenation of alkynes  
under neutral conditions**

---

Murugan Subaramanian,<sup>†,1</sup> Subarna Sukanya Padhy,<sup>†,1</sup> Chandrakanth Gouda,<sup>†,1</sup> Tamal Das,<sup>‡</sup> Kumar Vanka<sup>‡</sup> and Ekambaram Balaraman<sup>†\*</sup>

<sup>†</sup>Department of Chemistry, Indian Institute of Science Education and Research – Tirupati (IISER-T), Tirupati 517507, India.

<sup>‡</sup>Physical Chemistry Division, National Chemical Laboratory, Dr. Homi Bhabha Road, Pune - 411008, India.

<sup>1</sup>Equally contributed.

Email: eb.raman@iisertirupati.ac.in

---

**Contents**

|                                                        |      |
|--------------------------------------------------------|------|
| 1. General Information                                 | S2   |
| 2. Experimental Section                                | S3   |
| 3. Mechanistic Investigation                           | S5   |
| 4. Rate order determination                            | S21  |
| 5. Characterization Data                               | S27  |
| 6. DFT Studies and Reaction Mechanism                  | S40  |
| 7. References                                          | S45  |
| 8. <sup>1</sup> H and <sup>13</sup> C Spectra          | S46  |
| 9. PBE/TZVP optimized geometries and transition states | S129 |

## 1. General Information

All catalytic experiments were carried out using standard Schlenk techniques. All solvents were reagent grade or better. Methanol was refluxed over magnesium and distilled under an argon atmosphere and stored over molecular sieves. Metal complexes and other chemicals used in catalysis reactions were used without additional purification. Thin-layer chromatography (TLC) was performed using silica gel precoated aluminium plates, which were visualized with UV light at 254 nm or under iodine. Column chromatography was performed with SiO<sub>2</sub> (SilicycleSiliaflash F60 (230-400 mesh). <sup>1</sup>H NMR (200 or 400 or 500 MHz), <sup>13</sup>C{<sup>1</sup>H} NMR (50 or 101 or 126 MHz) spectra were recorded on the NMR spectrometer. Deuterated chloroform was used as the solvent, and chemical shift values ( $\delta$ ) are reported in parts per million relative to the residual signals of this solvent [ $\delta$  7.27 for <sup>1</sup>H (chloroform-d),  $\delta$  77.0 for <sup>13</sup>C{<sup>1</sup>H} (chloroform-d). Abbreviations used in the NMR follow-up experiments: br, broad; s, singlet; d, doublet; t, triplet; q, quartet; m, multiplet. GC analysis was carried out using an HP-5 column (30 m, 0.25 mm, 0.25 $\mu$ ). All the calculations in this study have been performed with density functional theory (DFT), with the aid of the Turbomole 7.1 suite of programs,<sup>1</sup> using the PBE functional.<sup>2</sup> The TZVP<sup>3</sup> basis set has been employed. The resolution of identity (RI),<sup>4</sup> along with the multipole accelerated resolution of identity (marij)<sup>5</sup> approximations, have been employed for an accurate and efficient treatment of the electronic Coulomb term in the DFT calculations. Solvent corrections were incorporated with optimization calculations using the COSMO model,<sup>6</sup> with methanol ( $\epsilon = 32.5$ ) as the solvent. The values reported are  $\Delta G$  values, with zero-point energy corrections, internal energy, and entropic contributions included through frequency calculations on the optimized minima with the temperature taken to be 298.15 K. Harmonic frequency calculations were performed for all stationary points to confirm them as local minima or transition state structures.

## 2. Experimental Section

### General procedure for the preparation of *E*-selective alkenes from internal alkynes

In an oven-dried screw cap reaction tube (15 mL) containing alkyne (0.5 mmol) and paraformaldehyde (1.5 mmol), [1,3-Bis(diphenylphosphino)propane]dichloronickel(II)-NiCl<sub>2</sub>.dppp (10 mol%) and methanol (1 mL) added in a gentle stream of argon. Then the reaction mixture was stirred with a magnetic stirring bar at 110 °C in an oil-bath for 16 h. After completion of the reaction, the crude mixture was cooled to room temperature, then filtered through a celite filter and washed with ethyl acetate (3×5 mL), followed by the solvent was removed under vacuum, and finally, the residue was purified by silica gel column chromatography (230–400 mesh size) using petroleum-ether or pentane and ethyl acetate as an eluent to give the alkenes.

Supplementary Table S1: Effect of Solvent

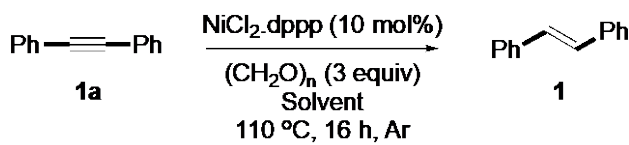

| Entry | Solvent                | Yield of 1 (%) | <i>E/Z</i> |
|-------|------------------------|----------------|------------|
| 1     | MeOH                   | 78             | 99:1       |
| 2     | EtOH                   | 72             | 99:1       |
| 3     | <i>i</i> -PrOH         | 32             | 99:1       |
| 4     | <i>t</i> -BuOH         | 19             | 90:10      |
| 5     | <i>t</i> -amyl alcohol | 10             | 82:18      |
| 6     | H <sub>2</sub> O       | n.r            | –          |

Supplementary Table S2: Effect of Paraformaldehyde

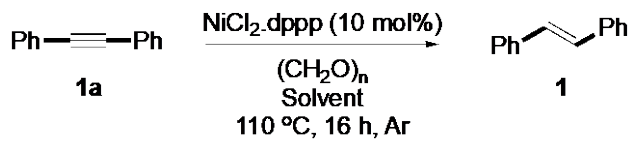

| Entry | Equiv of (HCHO) <sub>n</sub> | Yield of 1 (%) | <i>E/Z</i> |
|-------|------------------------------|----------------|------------|
| 1     | 0                            | n.r            | –          |
| 2     | 1                            | 56             | 94:6       |
| 3     | 2                            | 63             | 97:3       |
| 4     | 3                            | 74             | 98:2       |
| 5     | 4                            | 76             | 98:2       |
| 6     | 5                            | 78             | 99:1       |

Supplementary Table S3: Effect of Temperature

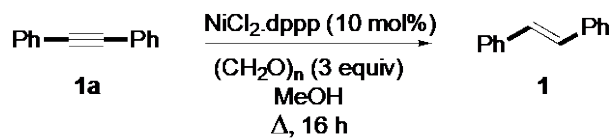

| Entry | Temperature (°C) | Yield of 1 (%) | E/Z  |
|-------|------------------|----------------|------|
| 1     | rt               | n.r            | —    |
| 2     | 50               | n.r            | —    |
| 3     | 80               | 48             | 96:4 |
| 4     | 110              | 78             | 99:1 |
| 5     | 130              | 74             | 99:1 |

Supplementary Table S4: Effect of Ligand

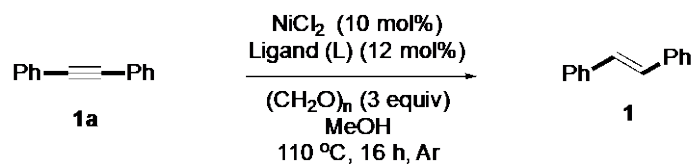

(i) Variation of Ligands

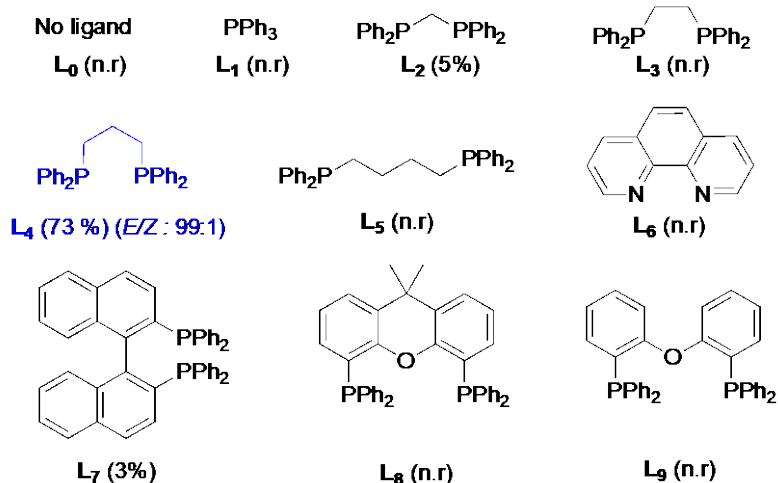

(ii) Ratio of NiCl<sub>2</sub> : L

| Entry | Ratio | Yield of 1 (%) | E/Z  |
|-------|-------|----------------|------|
| 1     | 0:1   | n.r            | —    |
| 2     | 1:0   | n.r            | —    |
| 3     | 1:1   | 65             | 96:4 |
| 4     | 1:1.2 | 73             | 99:1 |

### 3. Mechanistic Investigation

#### 3.1 H<sub>2</sub> detection

To an oven-dried 10 mL screw-capped vial, paraformaldehyde (1.5 mmol), [1,3-Bis(diphenylphosphino)propane]dichloronickel(II)-NiCl<sub>2</sub>.dppp (10 mol%) and methanol (1 mL) were added under a gentle stream of argon. Then the reaction mixture was stirred for 16 h at 110 °C (bath temperature). After completion of the reaction, the crude mixture was cooled to room temperature, followed by the sample was submitted to GC for detection of H<sub>2</sub> gas and GC-MS.

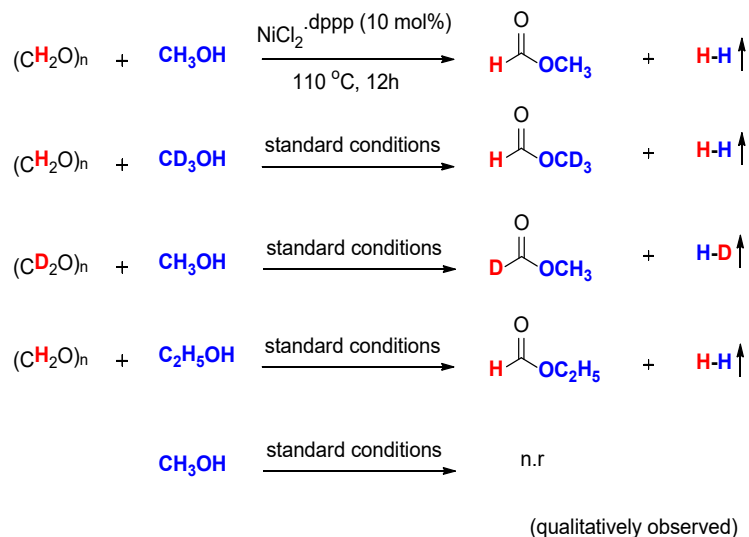

**Supplementary Scheme S1:** Formation of hydrogen gas and methyl formate.

**GC data for the detection of molecular Hydrogen**

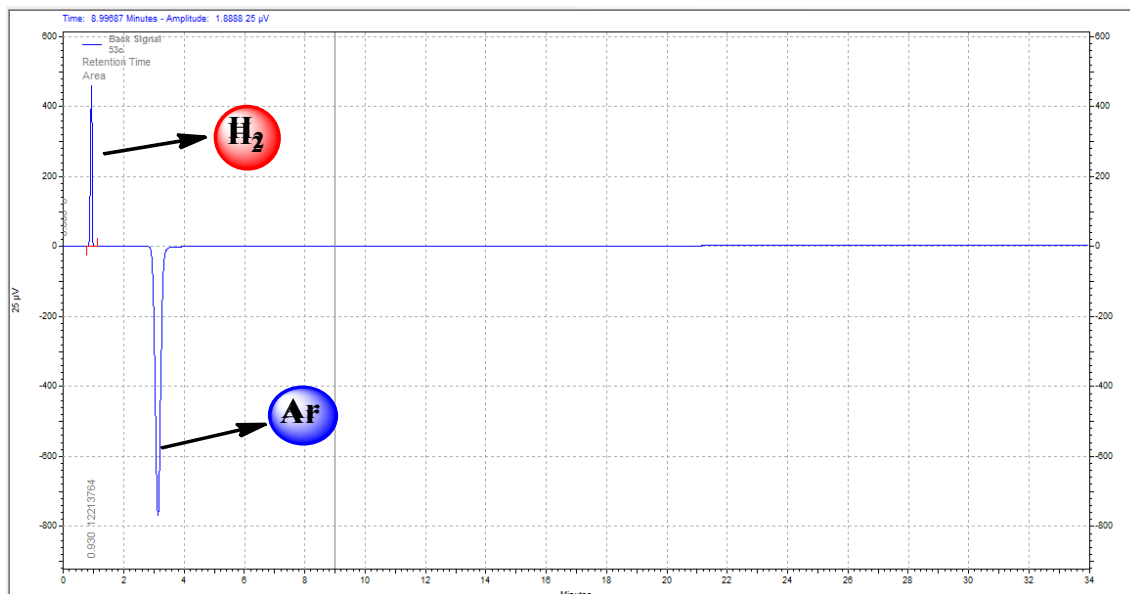

**Area % Report**

Data File: C:\Users\Lenovo\Desktop\deva\action spectrum\53c.dat  
 Method: C:\EZChrom Elite\Enterprise\Projects\Default\Method\TCD Offline.m et  
 Acquired: 8/8/2016 12:01:28 PM  
 Printed: 8/8/2016 2:36:02 PM

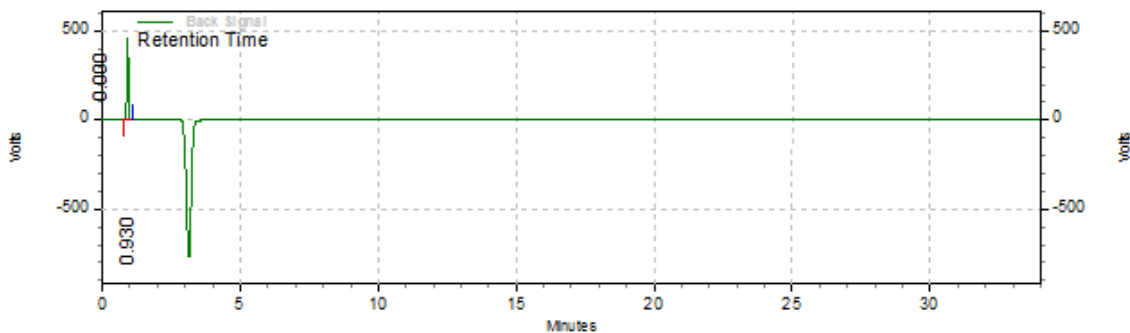**Back Signal  
Results**

| Retention Time | Area            | Area %        | Height         | Height %      |
|----------------|-----------------|---------------|----------------|---------------|
| 0.000          | 0               | 0.00          | 0              | 0.00          |
| 0.930          | 12213764        | 100.00        | 3527989        | 100.00        |
| <b>Totals</b>  | <b>12213764</b> | <b>100.00</b> | <b>3527989</b> | <b>100.00</b> |

**Supplementary Figure S1 & S2: Detection of hydrogen gas****3.2 Detection of reaction intermediate and byproducts**

To an oven-dried screw-capped low-pressure *J-young* NMR tube, paraformaldehyde (1 mmol), [1,3-Bis(diphenylphosphino)propane]dichloronickel(II)-NiCl<sub>2</sub>.dppp (10 mol%) and methanol-D<sub>4</sub> (0.6 mL) were added under a gentle stream of argon. Then the NMR tube was carefully closed by the screw cap. Then, the reaction mixture was stirred for 16 h at 110 °C (bath temperature). After completion of the reaction, the crude mixture was cooled to room temperature, and the sample was submitted for NMR measurement. The reaction intermediates, such as methyl formate, and Ni-hydride, were detected by NMR and conformed by chromatographic analysis (shown below). Similarly, the combination of methanol/ethanol and deuterated paraformaldehyde was performed, and the corresponding products were identified through GC and GC-MS.

### 3.2.1. $^1\text{H}$ and $^{13}\text{C}$ NMR of reaction mixture without diphenyl acetylene

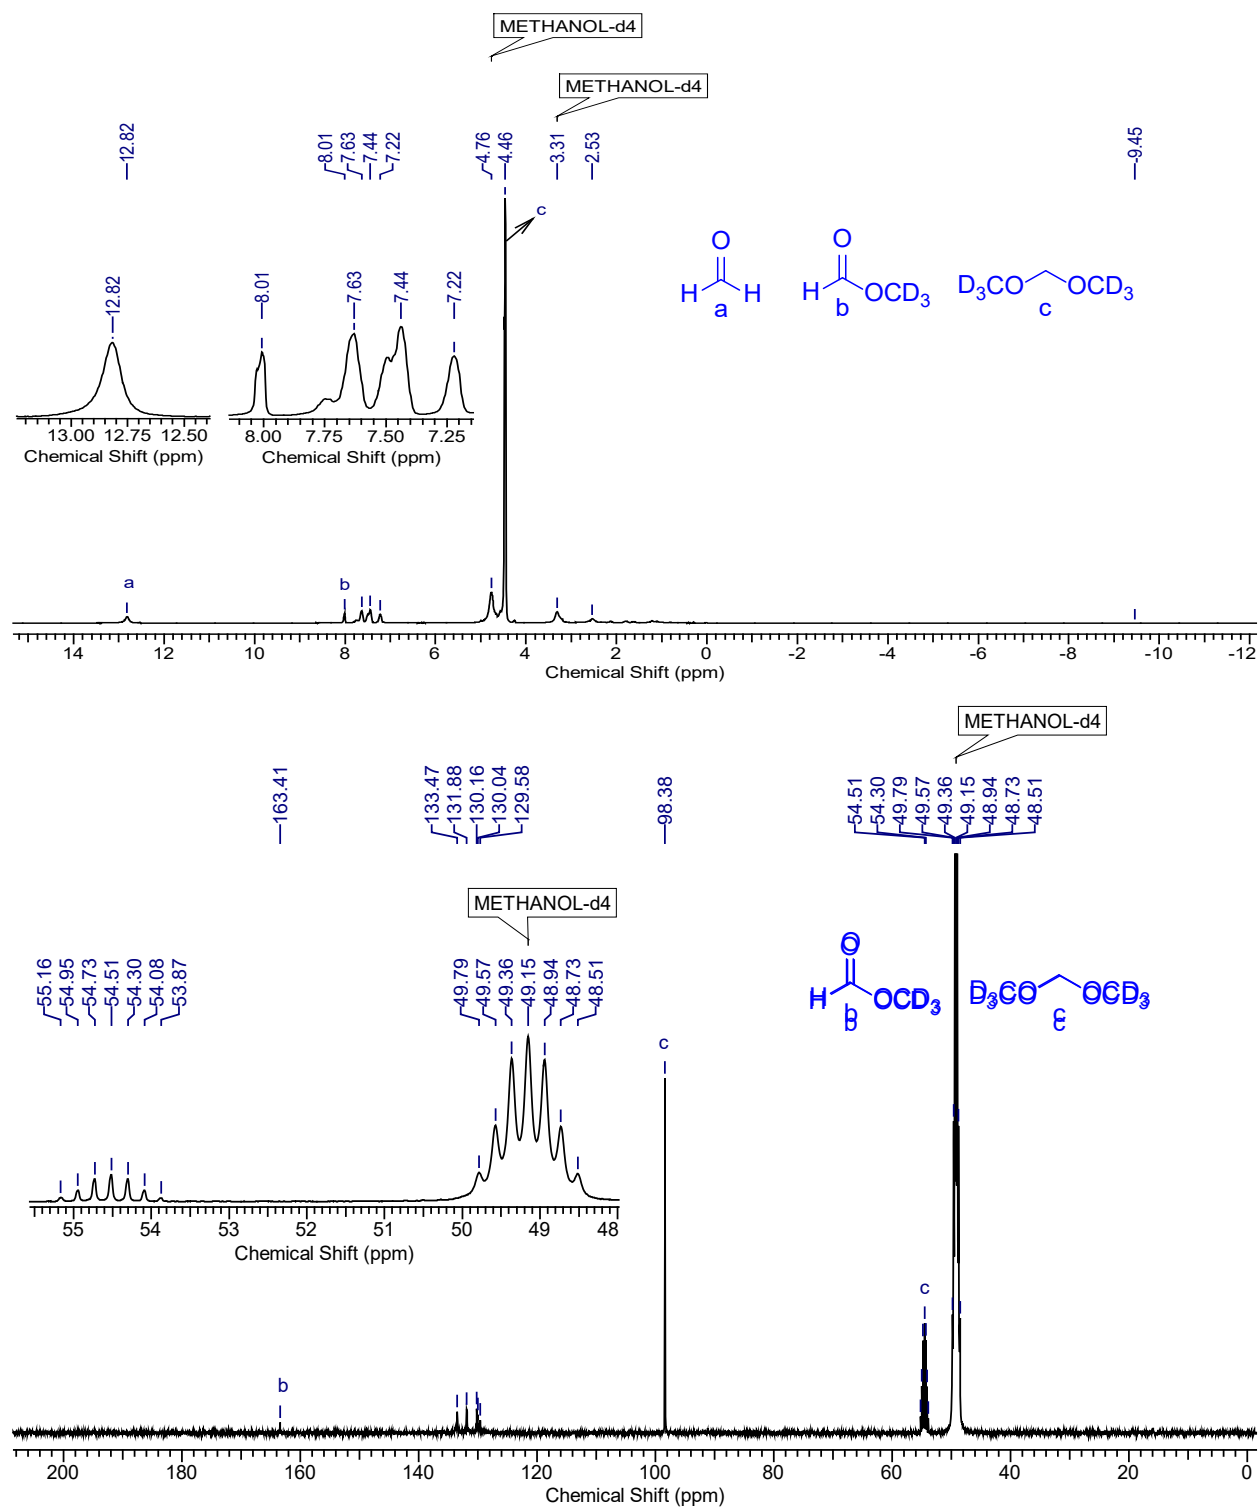

**Supplementary Figure S3 & S4:**  $^1\text{H}$  and  $^{13}\text{C}$  NMR detection of reaction intermediates from the reaction of paraformaldehyde, and MeOH-D<sub>4</sub> in the presence of NiCl<sub>2</sub>.dppp catalyst.

### 3.2.2 $^1\text{H}$ NMR of reaction mixture with diphenyl acetylene

To an oven-dried screw-capped vial, diphenyl acetylene (0.25 mmol), paraformaldehyde (0.75 mmol), [1,3-Bis(diphenylphosphino)propane]dichloronickel(II)- $\text{NiCl}_2\cdot\text{dppp}$  (10 mol%) and methanol- $\text{D}_4$  (0.5 mL) were added under a gentle stream of argon. Then the reaction mixture was stirred for 16 h at 110  $^\circ\text{C}$  (bath temperature). Upon finishing the reaction, 0.25 mmol of the internal standard (dibromomethane) was introduced to the reaction mixture. Subsequently, a representative sample was drawn from the reaction mixture, diluted with methanol- $\text{D}_4$ , and then submitted for  $^1\text{H}$  NMR analysis. As a result, the yield of methyl formate: methoxymethanol (hemiacetal): dimethoxymethane (acetal) was determined to be 8.7%: 33%: 21.3% concerning 0.75 mmol of paraformaldehyde. Their ratio, expressed as a percentage, is approximately (13.81: 52.38: 33.81). Consequently, we can understand that out of 0.75 mmol of paraformaldehyde, 66% undergoes conversion into hemiacetal and methyl formate, utilized in the semihydrogenation reaction, while the remaining 34% contributes to acetal formation.

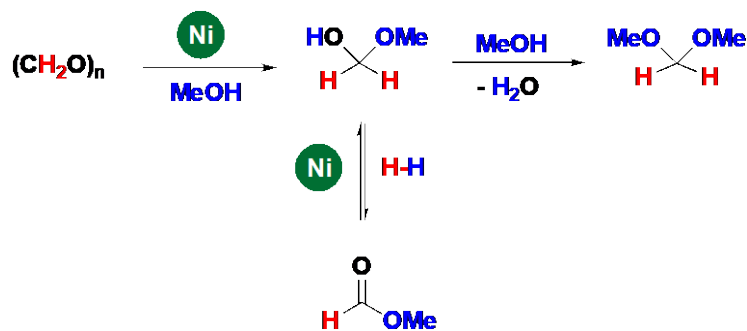



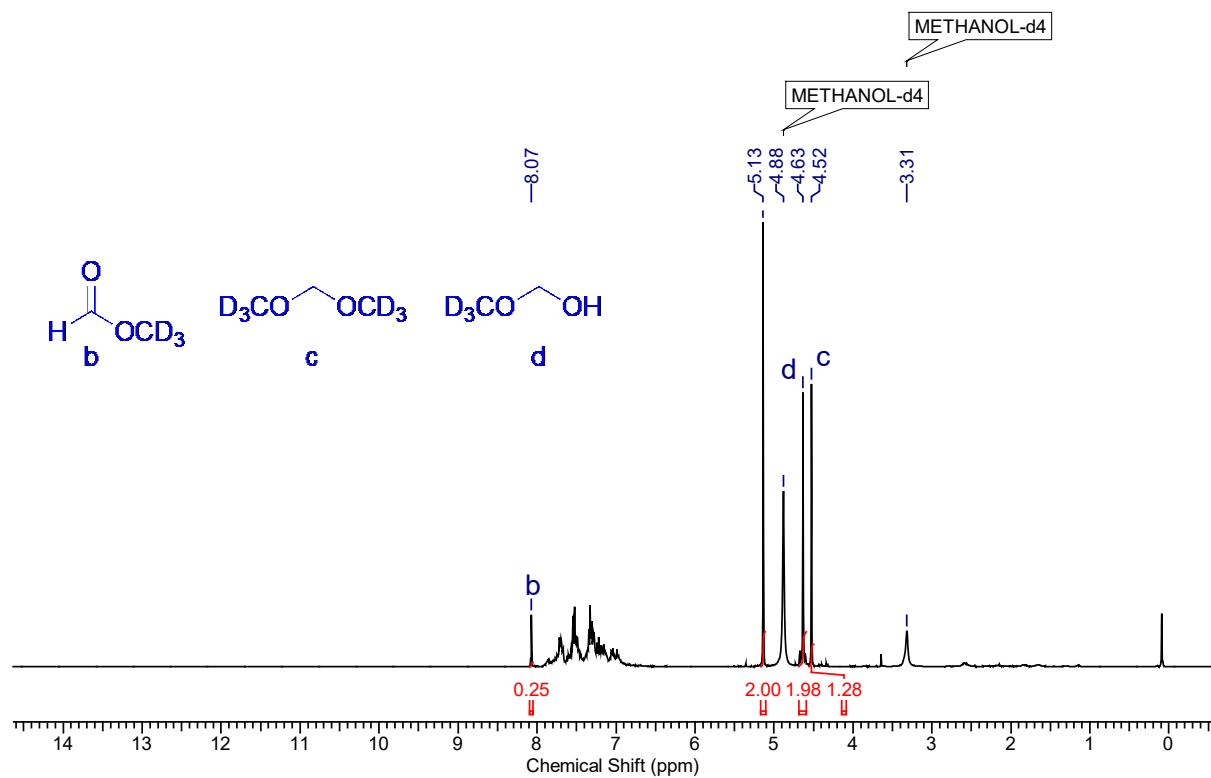

**Supplementary Figure S5:**  $^1\text{H}$  NMR detection of reaction intermediates from the reaction of diphenyl acetylene, paraformaldehyde, and MeOH-D4 in the presence of  $\text{NiCl}_2\cdot\text{dppp}$  catalyst.

### 3.2.3. Detection of Ni-H intermediate

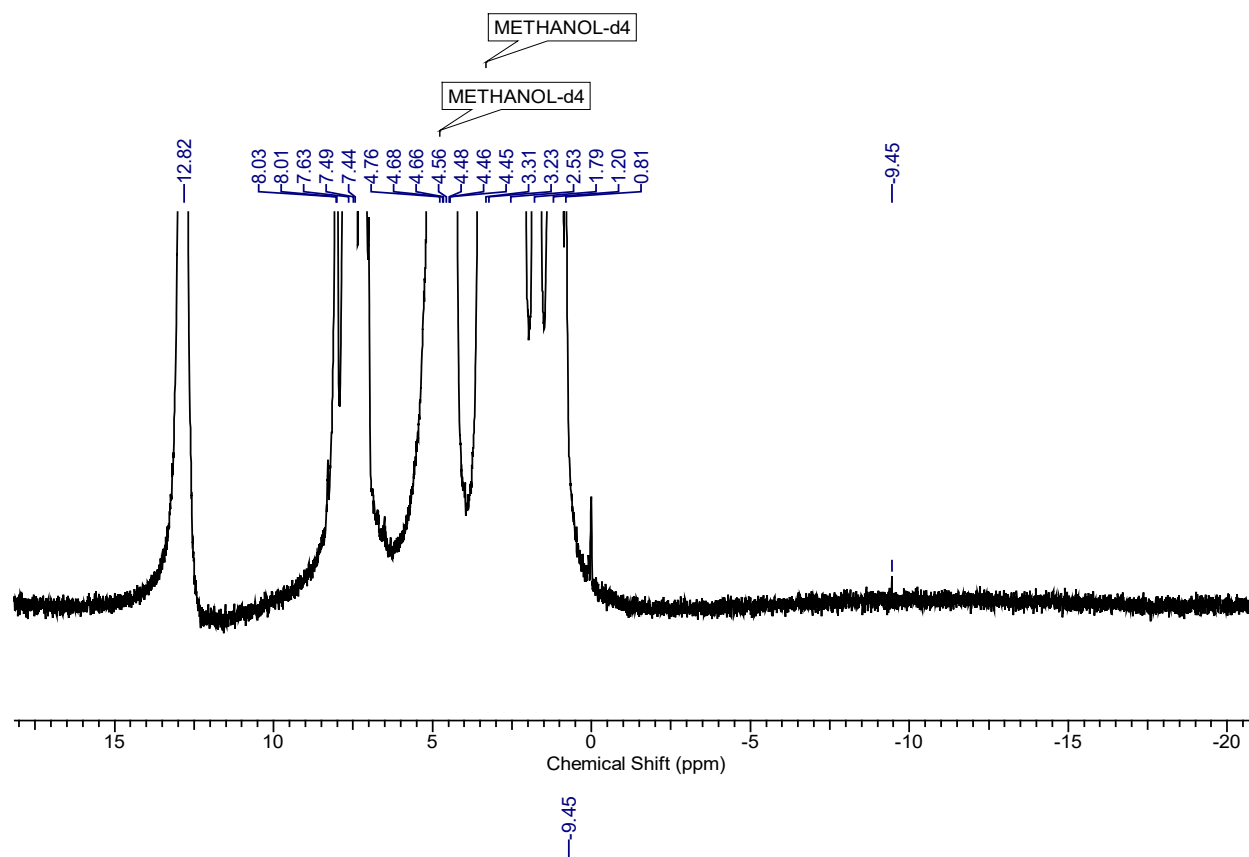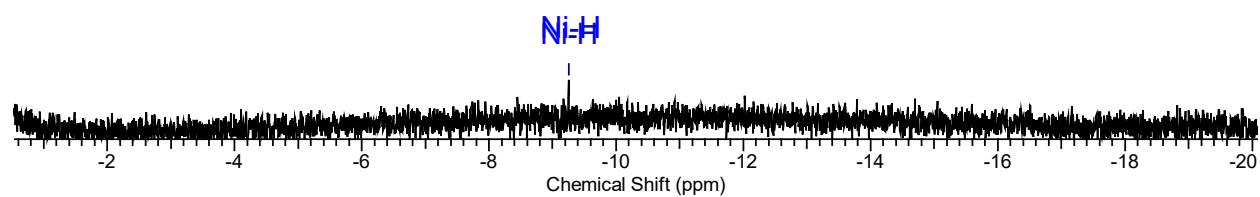

Supplementary Figure S6 & S7: Detection of Ni-H

### 3.2.4. GC-MS data for various formate byproduct

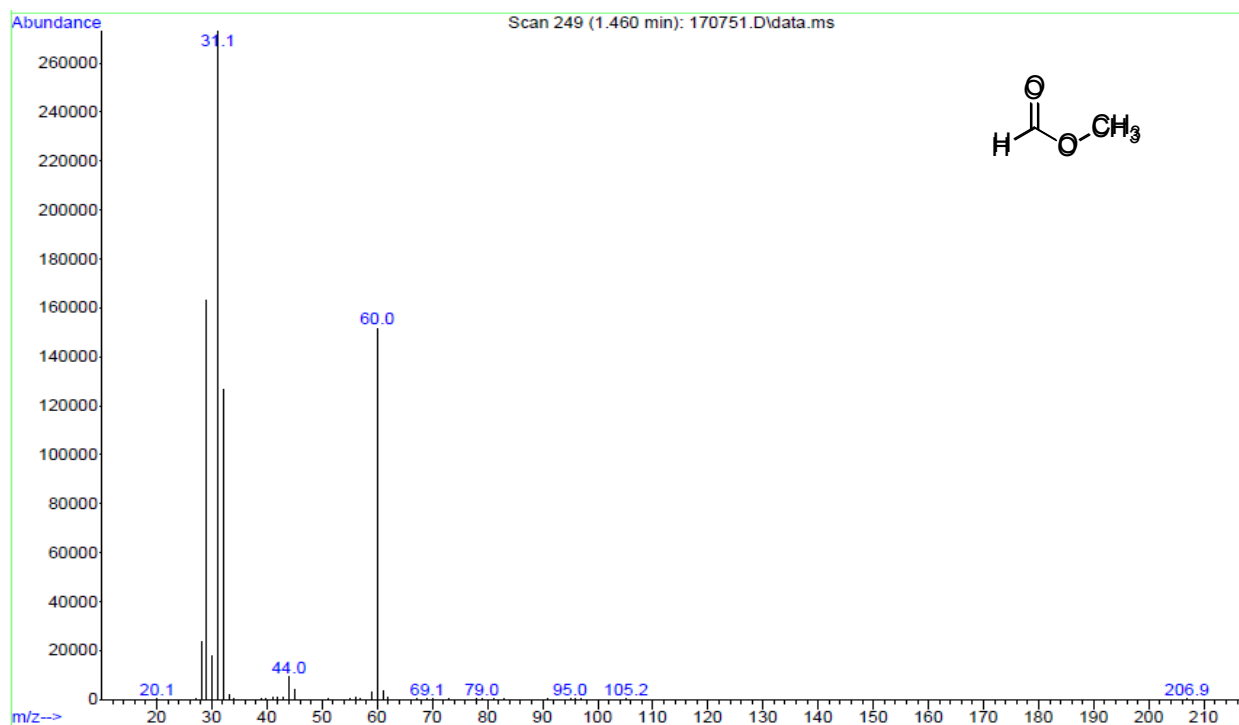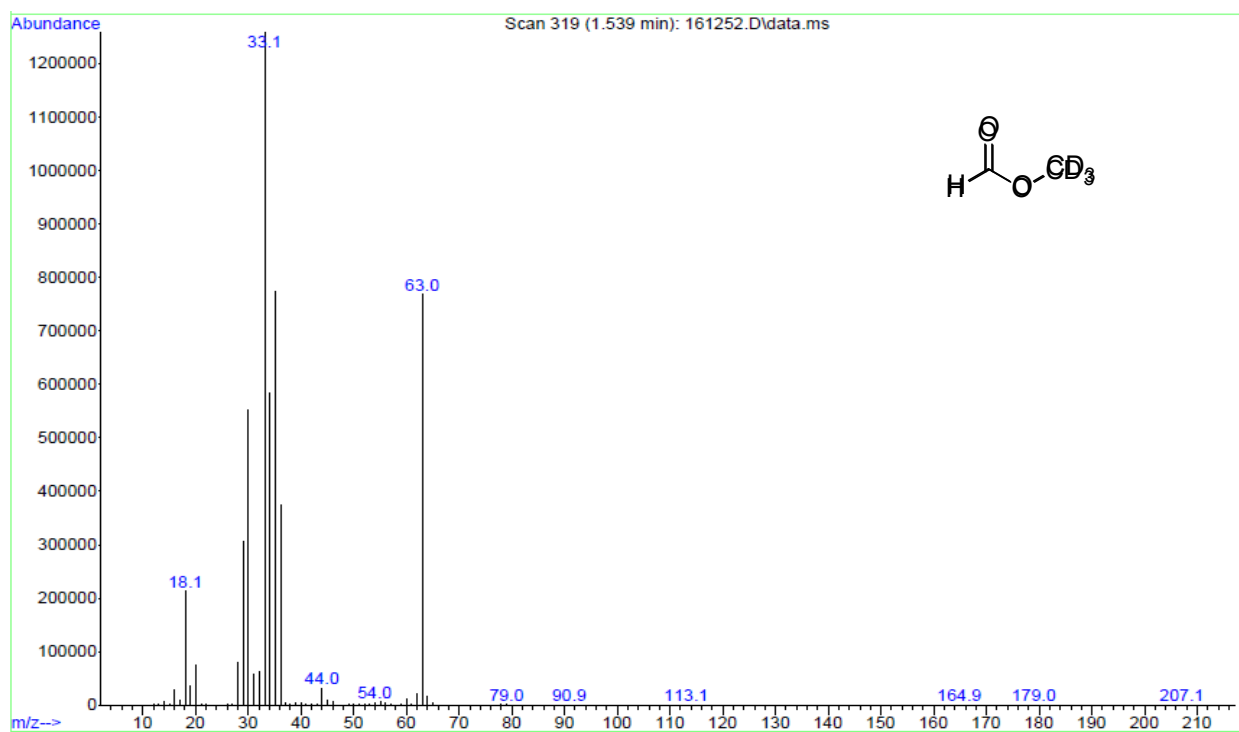

Supplementary Figure S8 & S9: Detection of reaction intermediates by GCMS

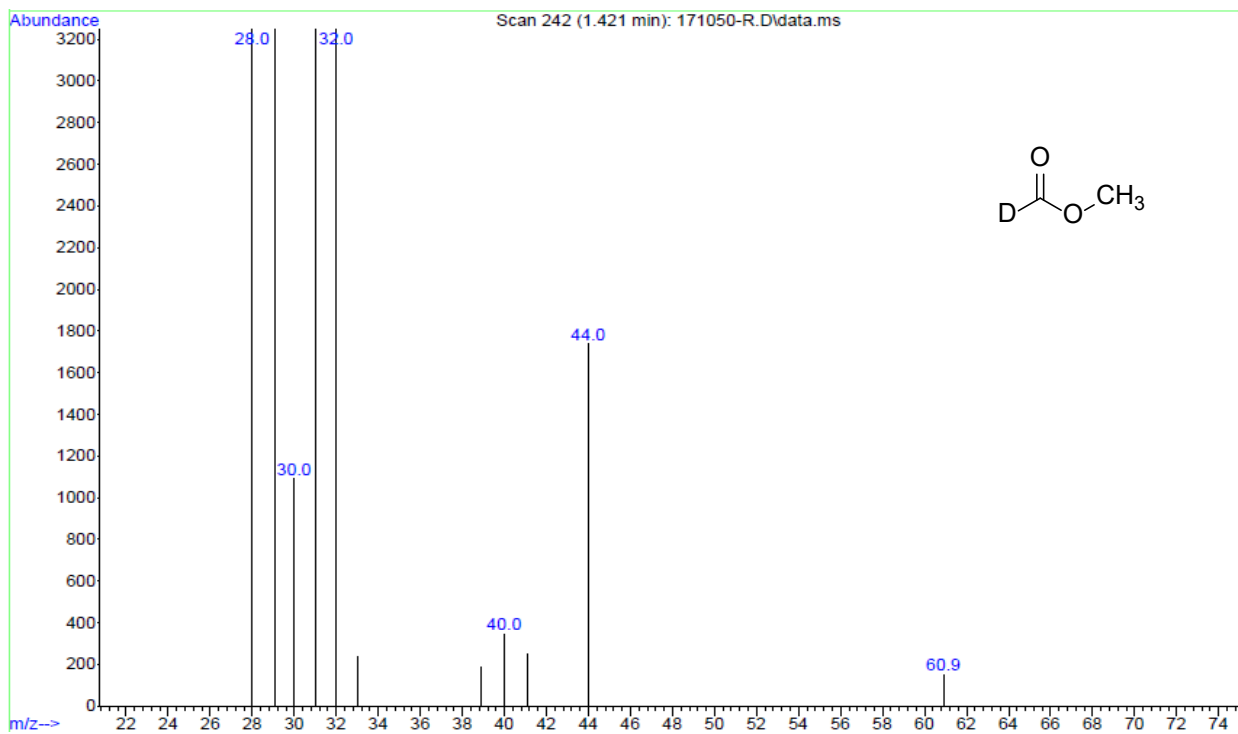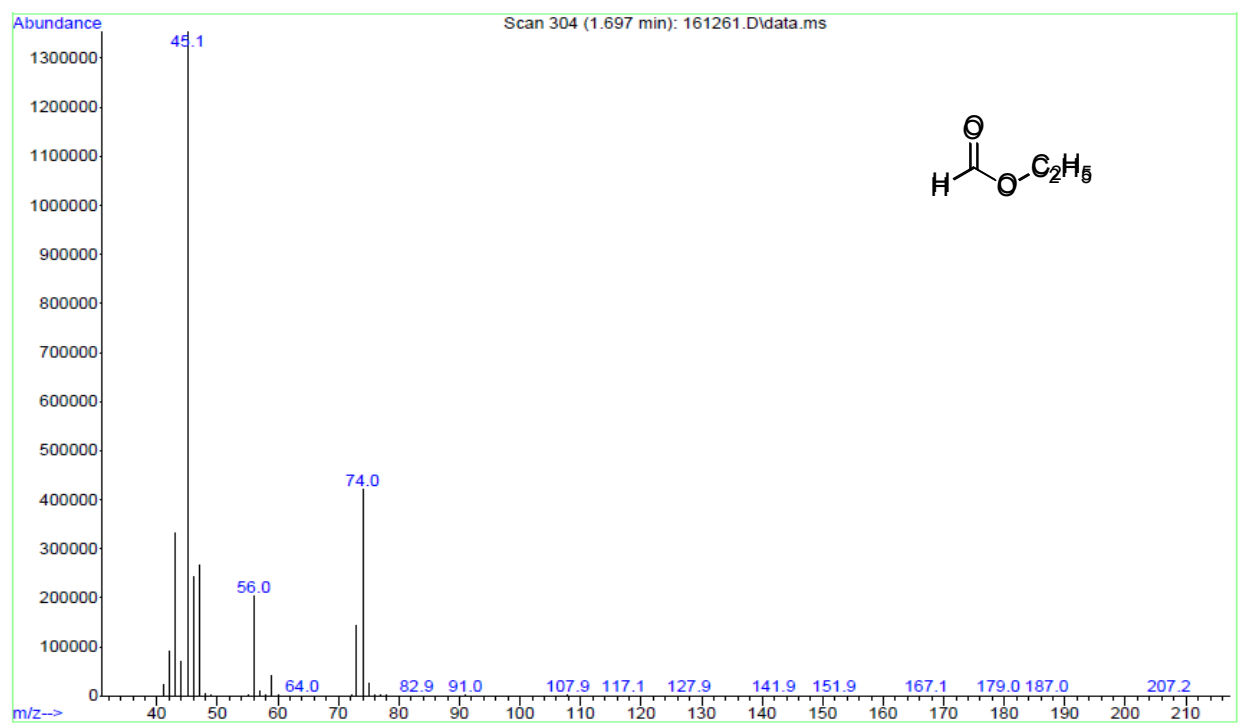

**Supplementary Figure S10 & S11: Detection of various formate byproducts by GCMS**

### 3.3 Deuterium labeling experiment

(i) To an oven-dried 10 mL screw-capped vial, alkyne (0.5 mmol), paraformaldehyde (1.5 mmol), [1,3-Bis(diphenylphosphino)propane]dichloronickel(II)-NiCl<sub>2</sub>.dppp (10 mol%) and CH<sub>3</sub>OD (1 mL) were added under a gentle stream of argon. Then the reaction mixture was stirred for 16 h at 110 °C (bath temperature). After completion of the reaction, the crude mixture was cooled to room temperature, followed by filtered through a celite pad with several washings (3 x 3 mL ethyl acetate), and concentrated *in vacuo*. The residue was purified by column chromatography on silica gel (eluent: pet ether) to afford the desired product.

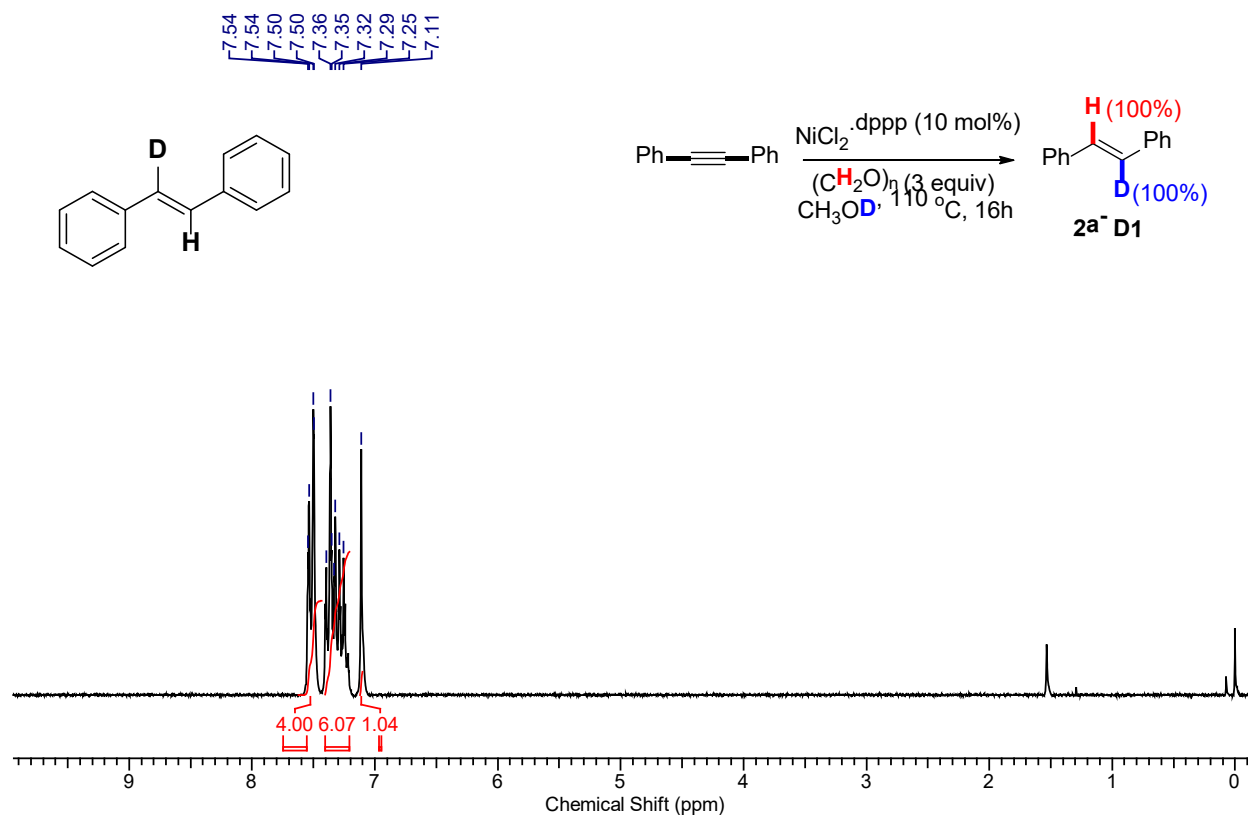

Supplementary Figure S12: Deuterium labeling experiment

(ii) To an oven-dried 10 mL screw-capped vial, alkyne (0.5 mmol), paraformaldehyde-D<sub>2</sub> (1.5 mmol), [1,3-Bis(diphenylphosphino)propane]dichloronickel(II)-NiCl<sub>2</sub>.dppp (10 mol%) and CH<sub>3</sub>OD (1 mL) were added under a gentle stream of argon. Then the reaction mixture was stirred for 16 h at 110 °C (bath temperature). After completion of the reaction, the crude mixture was cooled to room temperature, followed by filtration through a celite pad with several washings (3 x

3 mL ethyl acetate) and concentrated *in vacuo*. The residue was purified by column chromatography on silica gel (eluent: pet ether) to afford the desired product.

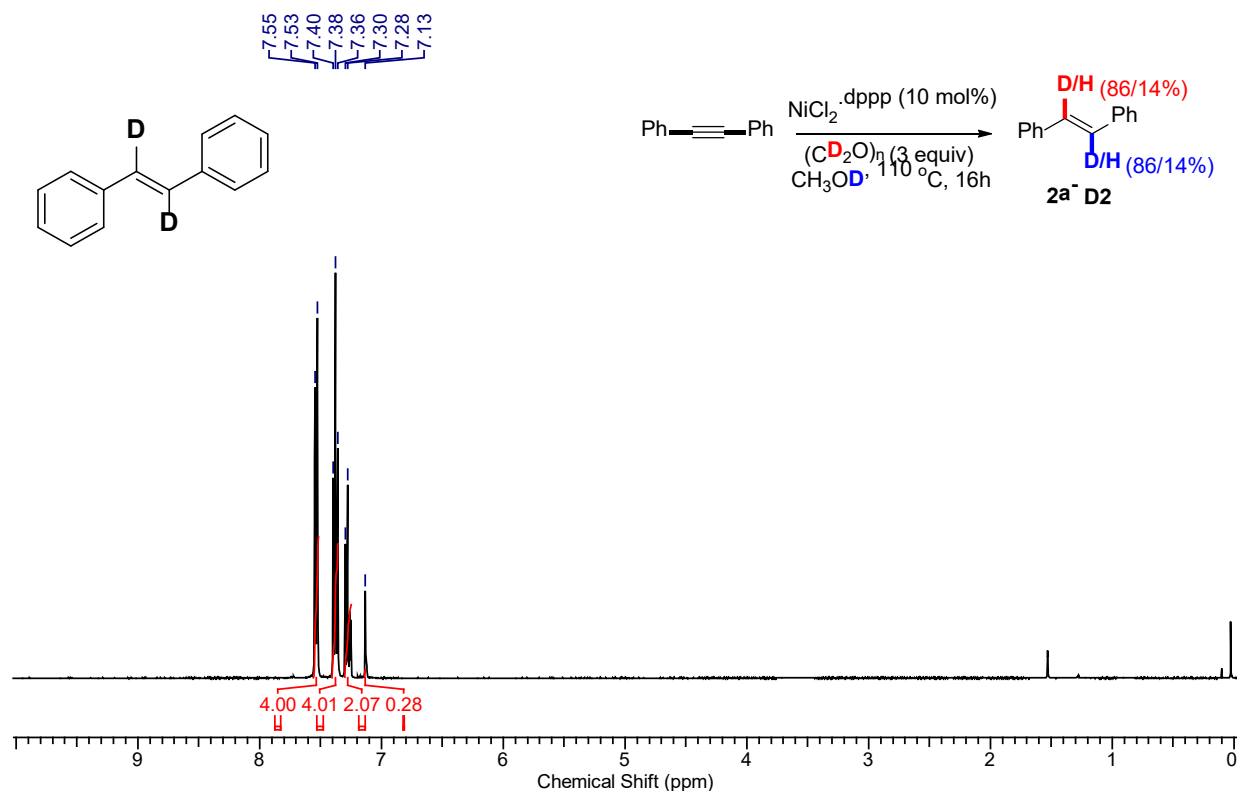

**Supplementary Figure 13:** Deuterium labeling experiment

### 3.4 Isomerization experiment

To an oven-dried 10 mL screw-capped vial, cis-stilbene (0.5 mmol), paraformaldehyde (1.5 mmol), [1,3-Bis(diphenylphosphino)propane]dichloronickel(II)-NiCl<sub>2</sub>·dppp (10 mol%) and CH<sub>3</sub>OH (1 mL) were added under a gentle stream of argon. Then the reaction mixture was stirred for 16 h at 110 °C (bath temperature). After completion of the reaction, the crude mixture was cooled to room temperature, followed by filtration through a celite pad with several washings (3 x 3 mL ethyl acetate) and concentrated *in vacuo*. The yield of alkene was determined by GC and NMR spectroscopy. Similarly, the isomerization reaction was performed with different combinations of deuterated methanol and deuterated paraformaldehyde using cis-stilbene, and the crude mixture was analyzed by GC and NMR measurements.

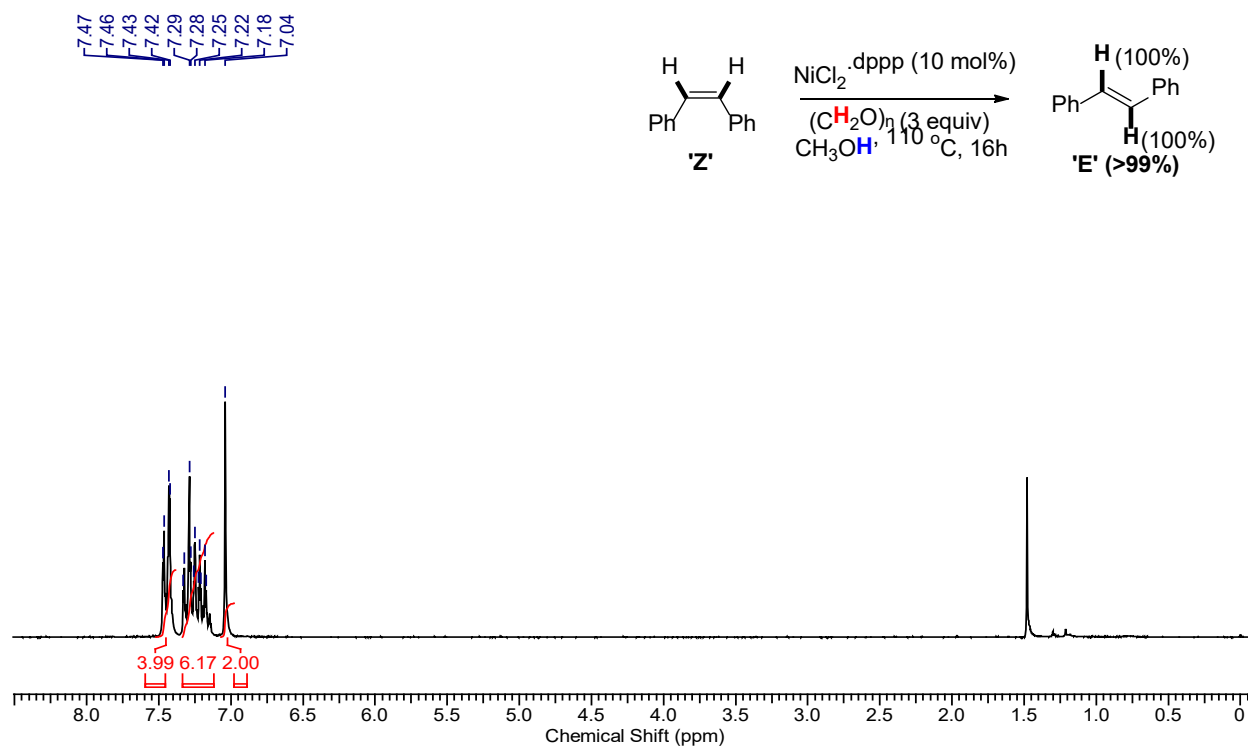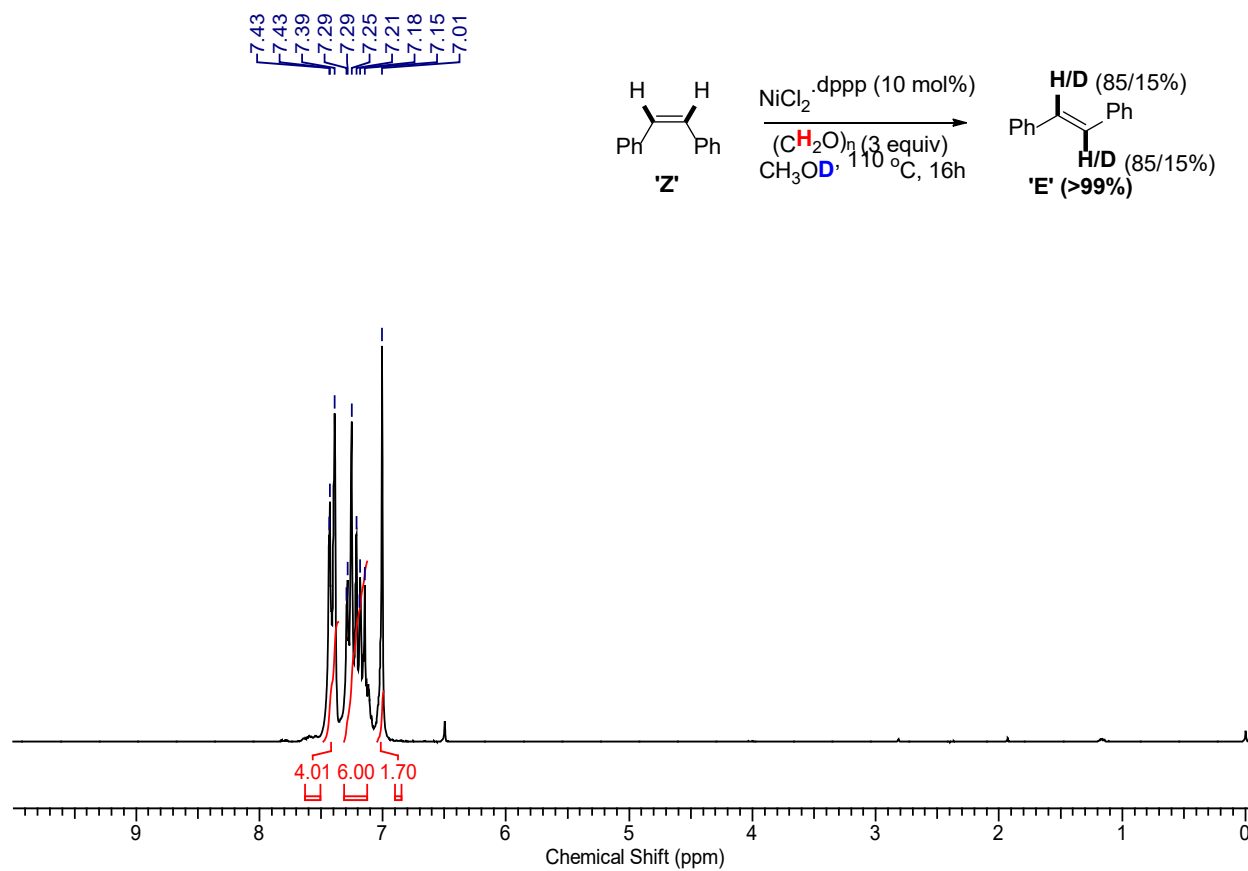

Supplementary Figures S14 & S15: *Cis* to *trans* isomerization reaction

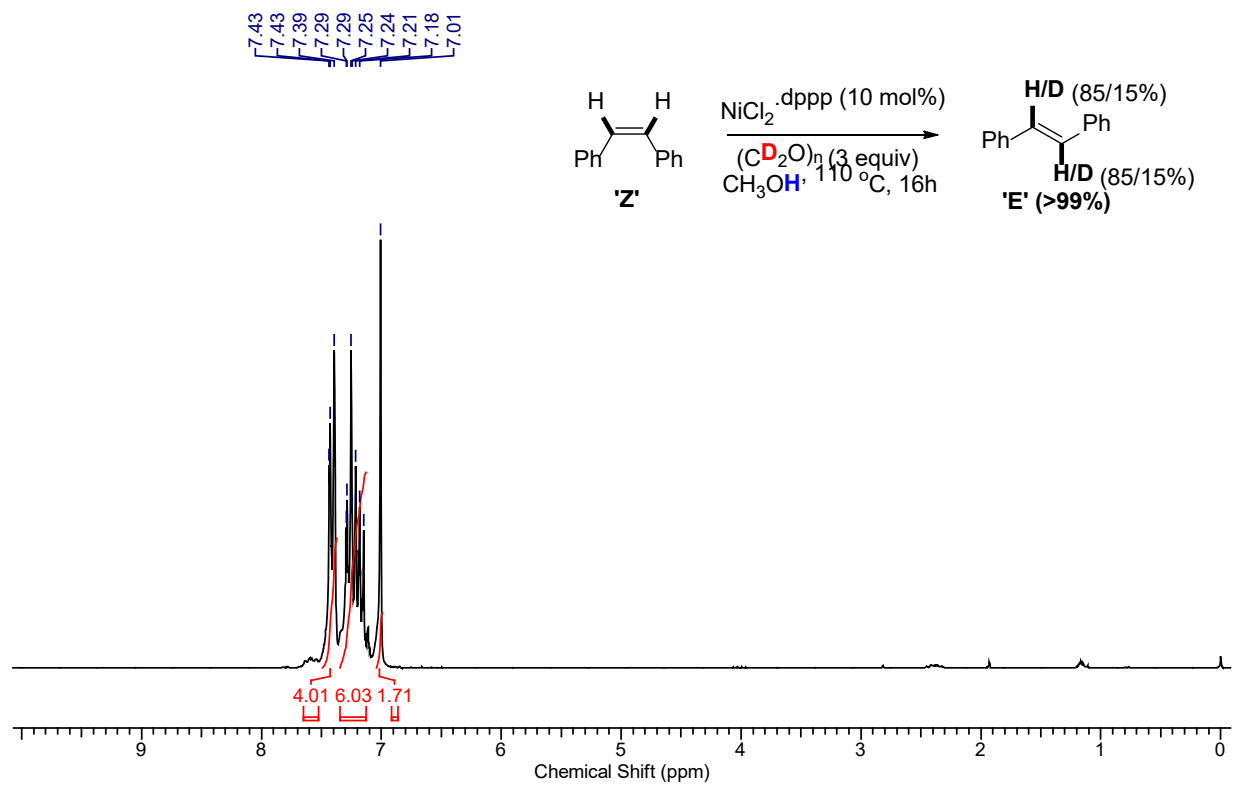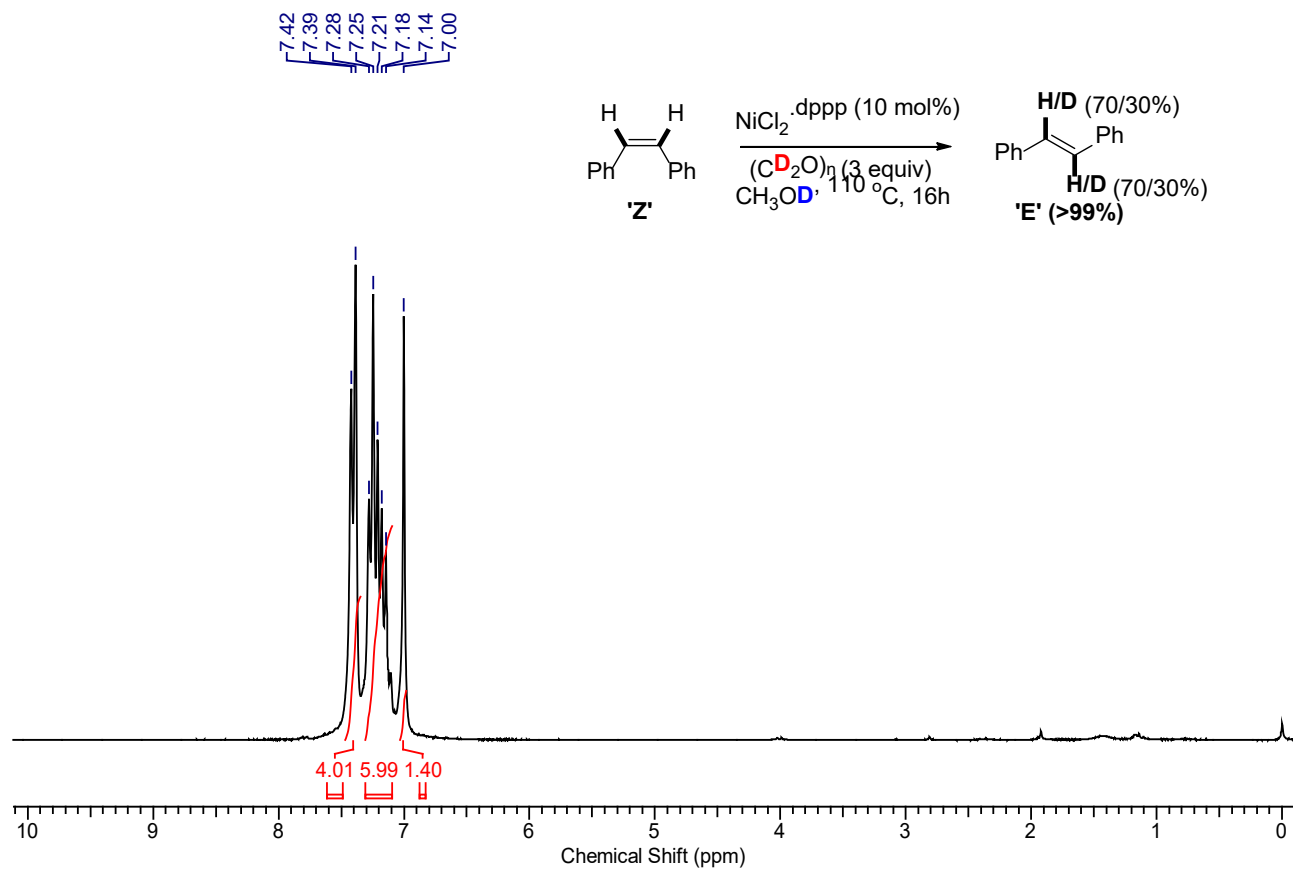

Supplementary Figures S16 & S17: *Cis* to *trans* isomerization reaction



### 3.5 Selective removal of alkyne and alkene impurities

To an oven-dried 30 mL screw-capped vial, alkyne (0.05 mmol) or cis-stilbene (0.05 mmol) or both, trans-stilbene (5 mmol), paraformaldehyde (15 mmol), [1,3-Bis(diphenylphosphino)propane]dichloronickel(II)-NiCl<sub>2</sub>.dppp (10 mol%) and CH<sub>3</sub>OH (8 mL) were added under a gentle stream of argon. The mixture was stirred for 12 h at 110 °C (bath temperature), followed by cooling to room temperature, and filtered through a celite pad with several washings with ethyl acetate and concentrated *in vacuo*. Then the crude mixture was analyzed by GC and NMR.

### 3.6 Homogenous test

**a) Mercury test:** To an oven-dried 10 mL screw-capped vial, alkyne (0.5 mmol), paraformaldehyde (2.5 mmol), NiCl<sub>2</sub> (10 mol%), Bis (1,3)-diphenyl phosphino propane (dppp) (20 mol%), 2 drops of mercury and methanol (1 mL) were added under a gentle stream of argon. The mixture was stirred for 12 hrs at 110 °C (bath temperature), followed by cooling to room temperature. Finally, the crude mixture was filtered through a celite pad with several washings (3 x 3 mL ethyl acetate) and concentrated *in vacuo*. The yield of alkene was determined by GC (75% of **1**).

**b) Hot-filtration test:** To an oven-dried 10 mL screw-capped vial, alkyne (0.5 mmol), paraformaldehyde (2.5 mmol), NiCl<sub>2</sub> (10 mol%), Bis (1,3)-diphenyl phosphino propane (dppp) (20 mol%), and methanol (1 mL) were added under a gentle stream of argon. The mixture was stirred for 3 hrs at 110 °C (bath temperature), followed by cooling to room temperature. After that, the reaction mixture was filtered using a syringe filter under argon atmosphere (at this stage, the crude reaction mixture was analyzed by GC (52% of **1**)). Then, the reaction mixture was transferred into another 15 mL oven-dried sealed tube under an argon atmosphere, and the reaction tube was sealed and heated at 110 °C (bath temperature) with stirring for 16 h. After cooling to room temperature, the crude reaction mixture was quantitatively analyzed by GC (76% of **1**), and it was observed that the yield of **1a** increased.

### 3.7 H<sub>2</sub> Quantification

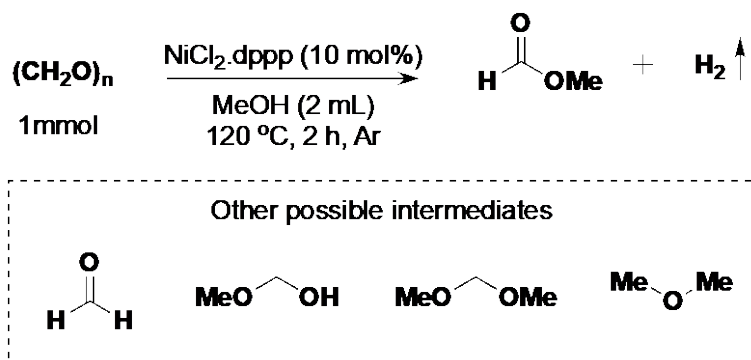

**Supplementary Scheme S2:** Formation of methyl formate and H<sub>2</sub> gas and other possible intermediates from the reaction mixture.

**Procedure for the H<sub>2</sub> Quantification:** Fischer porter tube (100 mL) was used with Pressure gauge (Swagelok) connected over it. An oven-dried Fischer Porter tube was taken, charged with 5 mol% catalyst ( $\text{NiCl}_2\cdot\text{dppp}$ ), 1 mmol of paraformaldehyde, and 2 mL anhydrous methanol, and connected with a pressure gauge. The Fischer Porter tube was dipped in a preheated oil bath at a temperature of  $120^\circ\text{C}$  and continued for 2 hours with constant monitoring of changes in pressure in the pressure gauge. In the initial 5-8 minutes, the pressure reached  $\sim 1$  bar, and it reached  $\sim 2$  bar within the next 5-10 minutes. Later, the pressure remains constant for a longer time, even after 16 hours. To analyze the H<sub>2</sub> gas, the Fischer tube was taken out from the oil bath after 2 hours and kept in the ice bath for 5-10 minutes. Then, pressure was released, and volume displacement was calculated.

It was found to be 10-13.5 mL displacement in a burette after several attempts. The same reaction conditions were followed without using the catalyst ( $\text{NiCl}_2\cdot\text{dppp}$ ), the volume of released gas was analyzed by displacement in the burette, and it was found to be around 2-3 mL after several attempts.

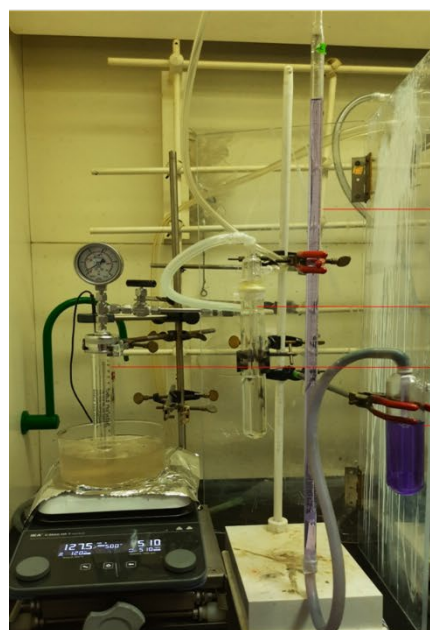

Usual setup for H<sub>2</sub> quantification

Burette for  
volume displacement  
measurement

Inlet bubbler

Fischer porter tube

Inlet bubbler

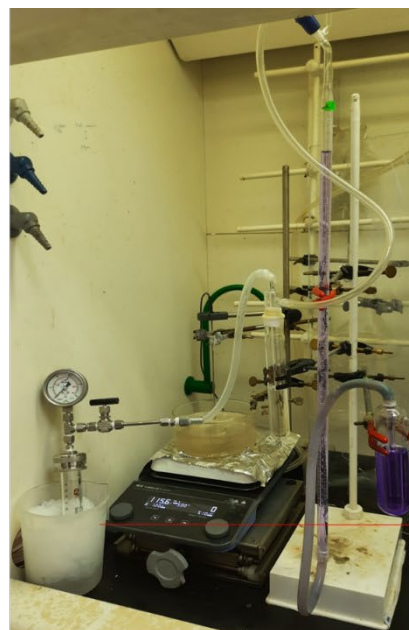

Usual setup for H<sub>2</sub> quantification

Ice bathA

### Supplementary Figure S18: H<sub>2</sub> Quantification setup

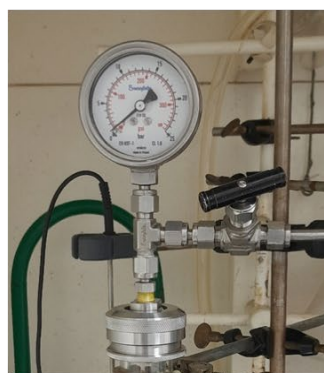

Observed pressure in  
first 5-8 minutes

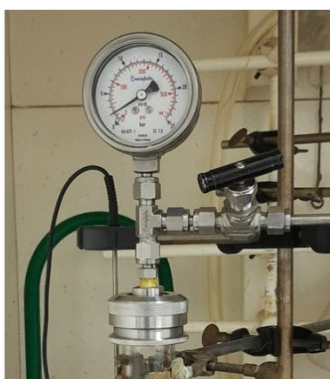

Observed pressure in-between  
8-15 minutes

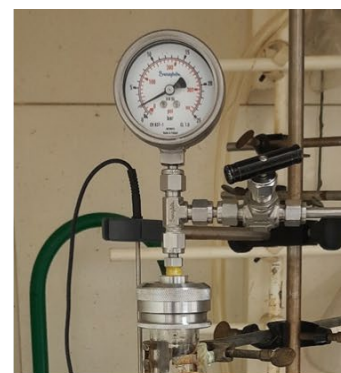

Observed pressure after  
15 minutes to till 2 hours

### Supplementary Figure S19: Pressure difference observed in pressure gauge

**Reaction in Parr reactor:** To observe the precise pressure after 2 hours at 0°C and pressure change during the course of the reaction, Reaction was tried in the Parr reactor also with the same reaction condition. It is observed that, pressure reached up to 2.5-3 bar after 2 hours, and after detaching from the heating band and brought to 10-15 °C, pressure remained 0.2 bar.

**Conclusion:** After considering all the experiments (with catalyst and without catalyst), the volume of H<sub>2</sub> gas detected is around 8-10 mL. Hence the efficiency of the catalyst will be around 35% (expected H<sub>2</sub> gas volume for 1 mmol paraformaldehyde is 22.4 mL,  $(8/22.4)*100 = 35.71\%$ ).

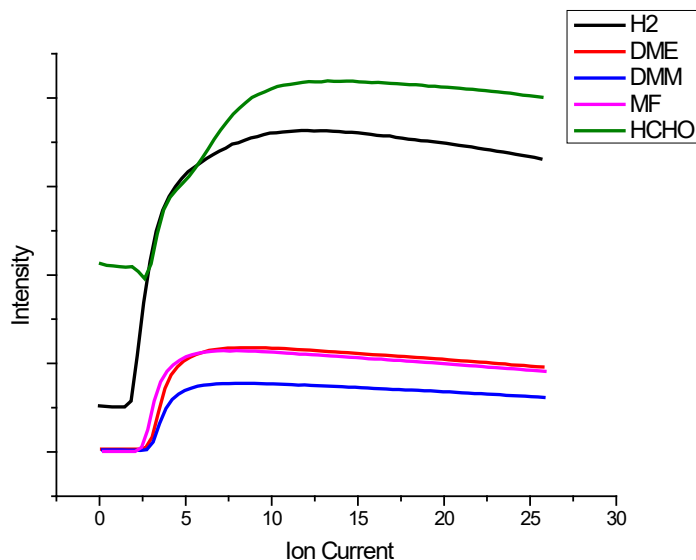

**Supplementary Figure S20:** Analysis of gaseous samples: Evolved gas analyzer

**Reaction condition:** Reaction was carried out in 10 mL reaction tube, paraformaldehyde (1 mmol), NiCl<sub>2</sub>(dppp) (5mol%), and MeOH (2 mL) heated at 120 °C for 2hrs.

## 4. Rate Order Determination

### 4.1 Kinetics study

We performed infrared (IR) spectroscopy to follow the reaction at its initial stages. Our observations revealed a continuous rise in alkene formation over time, and notably, no distinct induction time was observed, especially for this particular reaction. We observed a steady increase in alkene formation over time, and no clear induction time was detected. The IR spectroscopy data for the crude reaction mixture at 15 and 30 minutes are shown below,

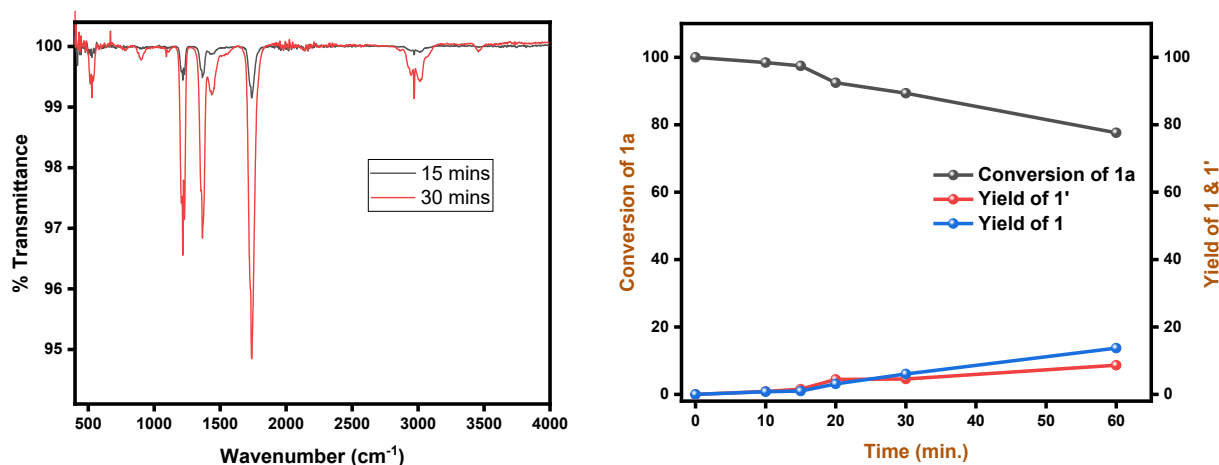

Supplementary Figure S21: Kinetic study

## 4.2 Determination of order of the reaction

### 4.2a Rate order determination for 1a.

The rate order of the semihydrogenation reaction with various reaction components was determined by the initial rate method. The data of the concentration of the product vs time (min) plot was fitted linear with Origin Pro 8. The slope of the linear fitting represents the reaction rate. The order of the reaction was then determined by plotting the log (rate) vs log (conc) for a particular component. Initially, to determine the order of the semihydrogenation reaction on **1a**, the initial rates at different low and high initial concentrations of **1a** were recorded. The final data was obtained by averaging the results of three independent runs for each experiment.

For low concentrations of **1a**, To an oven-dried 10 mL screw-capped vial, paraformaldehyde (30 mg, 1 mmol), NiCl<sub>2</sub>.dppp (13.5 mg, 10 mol%), a specific amount of **1a** (0.25 mmol scale) (as shown in table S5a), mesitylene (34 μL, 0.25 mmol) as internal standard and methanol (2 mL) was added under a gentle stream of argon. The reaction was carried out individually for each time interval. The mixture was stirred at 120 °C (bath temperature). At regular intervals, the reaction vessel was removed and cooled to ambient temperature, and an aliquot of sample was withdrawn to the GC vial. Finally, the sample was diluted with EtOAc and subjected to GC analysis. The

concentration of product **2a** obtained in each sample was determined with respect to the internal standard mesitylene.

For high concentrations of **1a**, To an oven-dried 10 mL screw-capped vial, paraformaldehyde (90 mg, 3 mmol), NiCl<sub>2</sub>.dppp (54.2 mg, 10 mol%), a specific amount of **1a** (1 mmol scale) (as shown in table S5b), mesitylene (68  $\mu$ L, 0.5 mmol) as internal standard and methanol (2 mL) was added under a gentle stream of argon. The reaction was carried out individually for each time interval. The mixture was stirred at 120 °C (bath temperature). At regular intervals, the reaction vessel was removed and cooled to ambient temperature, and an aliquot of sample was withdrawn to the GC vial. Finally, the sample was diluted with EtOAc and subjected to GC analysis. The concentration of product **1** obtained in each sample was determined with respect to the internal standard mesitylene.

**Supplementary Table S5a.** Rate of nickel-catalyzed semihydrogenation reaction at different low concentrations of **1a**.

| <b>Experiment</b> | <b>Amount of 1a (gm)</b> | <b>Initial concentration of 1a [M]</b> | <b>Initial Rate [Mmin<sup>-1</sup>] x 10<sup>-3</sup></b> |
|-------------------|--------------------------|----------------------------------------|-----------------------------------------------------------|
| 1                 | 0.022                    | 0.0625                                 | 0.085                                                     |
| 2                 | 0.044                    | 0.125                                  | 0.106                                                     |
| 3                 | 0.067                    | 0.188                                  | 0.186                                                     |
| 4                 | 0.089                    | 0.25                                   | 0.208                                                     |

**Supplementary Table S5b.** Rate of nickel-catalyzed semihydrogenation reaction at different high concentrations of **1a**.

| <b>Experiment</b> | <b>Amount of 1a (gm)</b> | <b>Initial concentration of 1a [M]</b> | <b>Initial Rate [Mmin<sup>-1</sup>] x 10<sup>-3</sup></b> |
|-------------------|--------------------------|----------------------------------------|-----------------------------------------------------------|
| 1                 | 0.134                    | 0.375                                  | 0.124                                                     |
| 2                 | 0.156                    | 0.438                                  | 0.396                                                     |
| 3                 | 0.178                    | 0.500                                  | 0.417                                                     |
| 4                 | 0.223                    | 0.626                                  | 0.949                                                     |

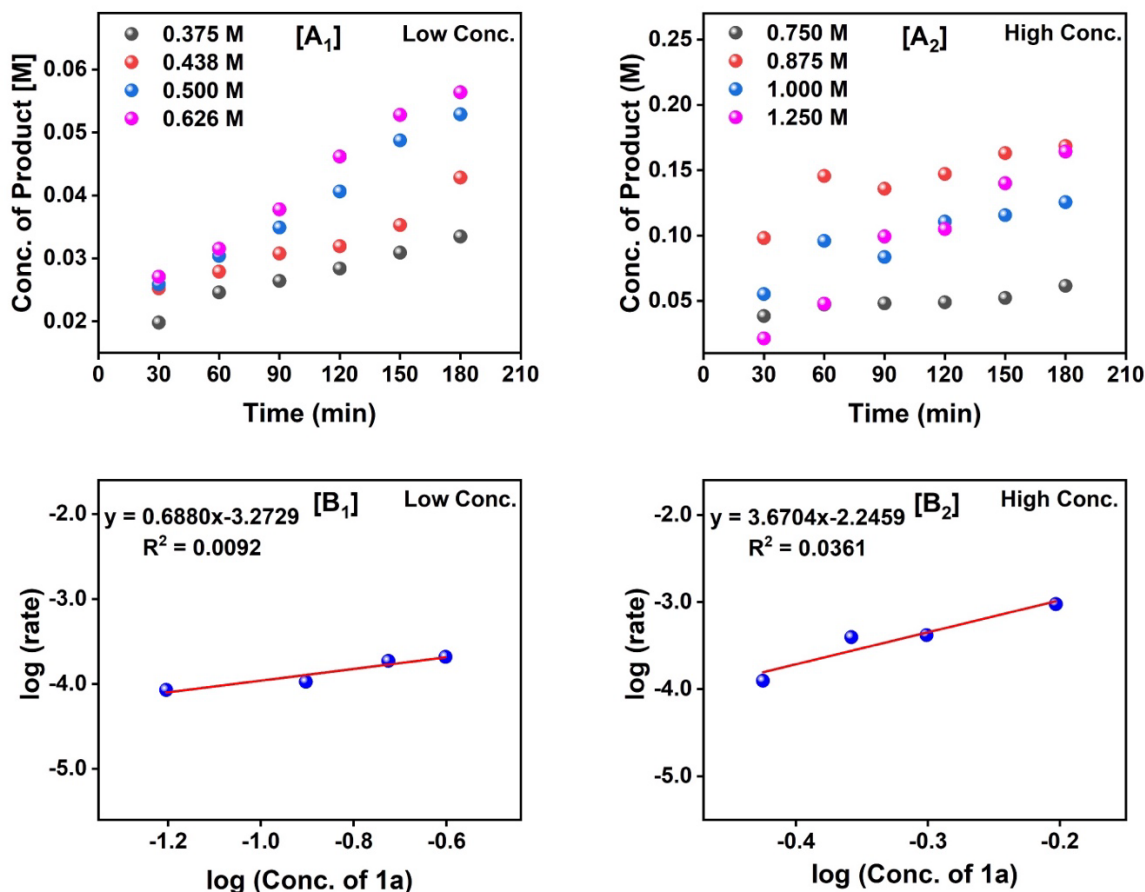

**Supplementary Figure S22:** The graph of (A<sub>1</sub>) Product concentration vs. time with different low concentrations of **1a**. (B<sub>1</sub>) log (rate) vs. log (conc. of **1a** at low conc.). (A<sub>2</sub>) Product concentration vs. time with different high concentrations of **1a**. (B<sub>2</sub>) log (rate) vs. log (conc. of **1a** at high conc.).

#### 4.2b Rate order determination for (CH<sub>2</sub>O)<sub>n</sub>.

To determine the order of the semihydrogenation reaction on (CH<sub>2</sub>O)<sub>n</sub>, the initial rates at different initial concentrations of (CH<sub>2</sub>O)<sub>n</sub> were recorded. The final data was obtained by averaging the results of three independent runs for each experiment.

To an oven-dried 10 mL screw-capped vial, diphenyl acetylene (44.5 mg, 0.25 mmol), NiCl<sub>2</sub>.dppp (13.5 mg, 10 mol%), a specific amount of paraformaldehyde (as shown in table S6), mesitylene (34 μL, 0.25 mmol) as internal standard and methanol (2 mL) were added under a gentle stream of argon. The reaction was carried out individually for each time interval. The mixture was stirred at 120 °C (bath-temperature). At regular intervals, the reaction vessel was removed and cooled to

ambient temperature, and an aliquot of sample was withdrawn to the GC vial. Finally, the sample was diluted with EtOAc and subjected to GC analysis. The concentration of product **1** obtained in each sample was determined with respect to the internal standard mesitylene.

**Supplementary Table S6.** Rate of nickel-catalyzed semihydrogenation reaction at different initial concentration of  $(\text{CH}_2\text{O})_n$ .

| Experiment | Amount of $(\text{CH}_2\text{O})_n$<br>(gm) | Initial concentration of $(\text{CH}_2\text{O})_n$<br>[M] | Initial Rate<br>[Mmin <sup>-1</sup> ] x 10 <sup>-3</sup> |
|------------|---------------------------------------------|-----------------------------------------------------------|----------------------------------------------------------|
| 1          | 0.015                                       | 0.25                                                      | 0.0786                                                   |
| 2          | 0.030                                       | 0.50                                                      | 0.0771                                                   |
| 3          | 0.045                                       | 0.75                                                      | 0.0957                                                   |
| 4          | 0.060                                       | 1.00                                                      | 0.0638                                                   |

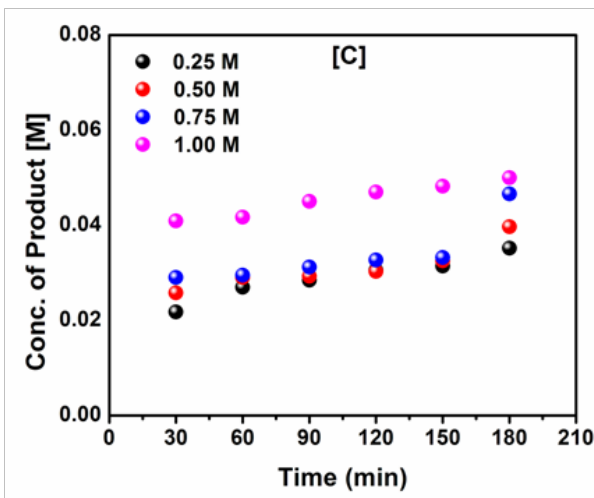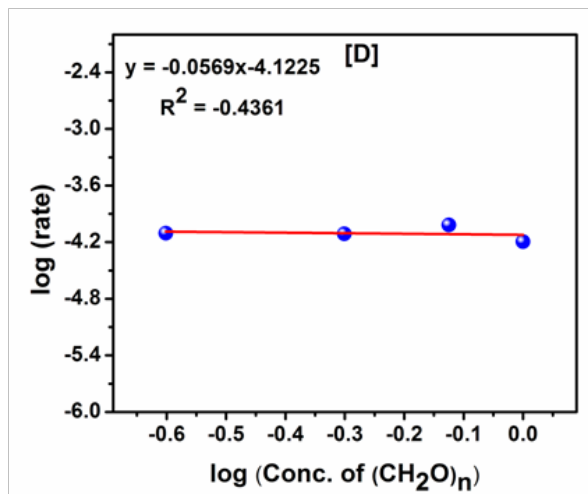

**Supplementary Figure S23:** The graph of (C) Time-dependent formation of **1** at different initial concentration of  $(\text{CH}_2\text{O})_n$ . (D) Plot of  $\log(\text{rate})$  vs  $\log(\text{conc. of } (\text{CH}_2\text{O})_n)$ .

#### 4.2c Rate order determination for cat. Ni

To determine the order of the semihydrogenation reaction in cat.[Ni], the initial rates at different initial concentrations of cat. Ni was recorded. The final data was obtained by averaging the results of three independent runs for each experiment.

To an oven-dried 10 mL screw-capped vial, diphenyl acetylene (44.5 mg, 0.25 mmol), paraformaldehyde (30 mg, 1 mmol), a specific amount of  $\text{NiCl}_2\cdot\text{dppp}$  (as shown in table S7),



mesitylene (34  $\mu\text{L}$ , 0.25 mmol) as internal standard, and methanol (2 mL) were added under a gentle stream of argon. The reaction was carried out individually for each time interval. The mixture was stirred at 120  $^{\circ}\text{C}$  (bath temperature). At regular intervals, the reaction vessel was removed and cooled to ambient temperature, and an aliquot of sample was withdrawn to the GC vial. Finally, the sample was diluted with EtOAc and subjected to GC analysis. The concentration of product **1** obtained in each sample was determined with respect to the internal standard mesitylene.

**Supplementary Table S7.** Rate of nickel-catalyzed semihydrogenation reaction at different initial concentration of **Cat. Ni**.

| Experiment | Amount of cat. Ni (gm) | Initial concentration of cat. Ni [M] | Initial Rate [ $\text{Mmin}^{-1}$ ] $\times 10^{-3}$ |
|------------|------------------------|--------------------------------------|------------------------------------------------------|
| 1          | 0.007                  | 0.0064                               | 0.1003                                               |
| 2          | 0.013                  | 0.0119                               | 0.1145                                               |
| 3          | 0.027                  | 0.0249                               | 0.1153                                               |
| 4          | 0.040                  | 0.0373                               | 0.1178                                               |

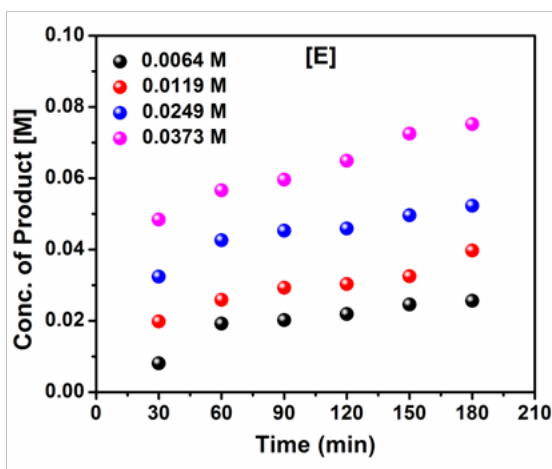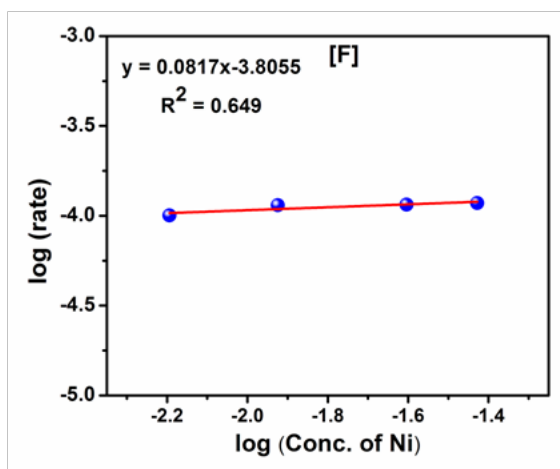

**Supplementary Figure S24.** The graph of (E) Time-dependent formation of **1** at different initial concentration of cat.Ni. (F) Plot of log (rate) vs log (conc. of cat. Ni).

## 5. Characterization Data

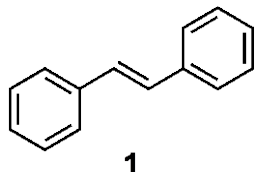

### (E)-1,2-diphenylethene (1)

White solid;  $^1\text{H}$  NMR (400 MHz, Chloroform-*d*)  $\delta$  7.56-7.54 (m, 4H), 7.41-7.38 (m, 4H), 7.32-7.28 (m, 2H), 7.15 (s, 2H);  $^{13}\text{C}$  NMR (101 MHz, Chloroform-*d*)  $\delta$  137.28, 128.65, 127.59, 126.48 ppm.

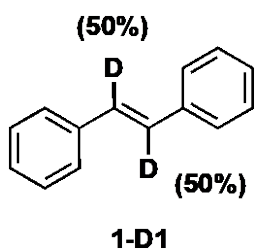

### (E)-1,2-diphenylethene- $\text{D}_1$ (1-D1)

White solid;  $^1\text{H}$  NMR (200 MHz, Chloroform-*d*)  $\delta$  7.54-7.50 (m, 4H), 7.36-7.25 (m, 6H), 7.11 (s, 1H);  $^{13}\text{C}$  NMR (50 MHz, Chloroform-*d*)  $\delta$  137.32, 128.68, 127.61, 126.50 ppm.

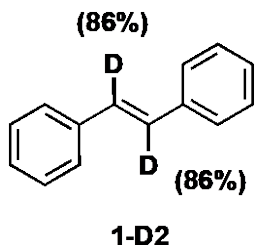

### (E)-1,2-diphenylethene- $\text{D}_2$ (1-D2)

White solid;  $^1\text{H}$  NMR (400 MHz, Chloroform-*d*)  $\delta$  7.55-7.53 (m, 4H), 7.40-7.36 (m, 4H), 7.30-7.28 (m, 2H);  $^{13}\text{C}$  NMR (101 MHz, Chloroform-*d*)  $\delta$  137.21, 128.66, 127.58, 126.47 ppm.

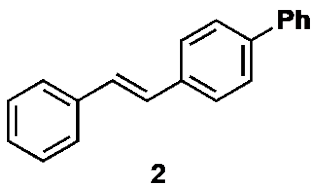

### (E)-4-styryl-1,1'-biphenyl (2)

White solid;  $^1\text{H}$  NMR (200 MHz, Chloroform-*d*)  $\delta$  7.58-7.18 (m, 14H), 7.08 (s, 2H);  $^{13}\text{C}$  NMR (50 MHz, Chloroform-*d*)  $\delta$  140.67, 140.33, 137.32, 136.38, 128.79, 128.70, 128.19, 127.65, 127.34, 126.92, 126.52 ppm.

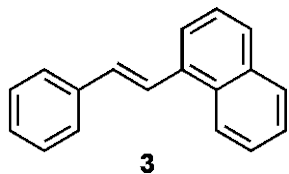

**(*E*)-1-styrylnaphthalene (3)**

White solid;  $^1\text{H}$  NMR (200 MHz, Chloroform-*d*)  $\delta$  8.15 (d,  $J = 8.0$  Hz, 1H), 7.83-7.67 (m, 4H), 7.55-7.41 (m, 4H), 7.33 (t,  $J = 7.6$  Hz, 2H), 7.28-7.22 (m, 1H), 7.18-7.01 (m, 2H);  $^{13}\text{C}$  NMR (126 MHz, Chloroform-*d*)  $\delta$  137.61, 135.02, 133.72, 131.77, 131.40, 129.04, 128.74, 128.61, 128.03, 127.77, 126.68, 126.08, 125.82, 125.69, 123.77, 123.62 ppm.

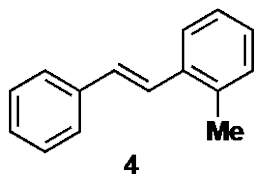

**(*E*)-1-methyl-2-styrylbenzene (4)**

Pale yellow liquid;  $^1\text{H}$  NMR (200 MHz, Chloroform-*d*)  $\delta$  7.64-7.52 (m, 3H), 7.43-7.28 (m, 4H), 7.24-7.19 (m, 3H), 7.01 (d,  $J = 16.1$  Hz, 1H), 2.45 (s, 3H);  $^{13}\text{C}$  NMR (50 MHz, Chloroform-*d*)  $\delta$  137.68, 136.39, 135.80, 130.39, 130.01, 128.67, 127.57, 126.55, 126.19, 125.36, 19.90 ppm.

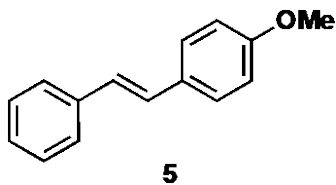

**(*E*)-1-methoxy-4-styrylbenzene (5)**

White solid;  $^1\text{H}$  NMR (200 MHz, Chloroform-*d*)  $\delta$  7.52-7.23 (m, 7H), 7.12-7.00 (dd,  $J = 7.4, 4.8$  Hz, 2H), 6.92-6.88 (m, 2H), 3.83 (s, 3H);  $^{13}\text{C}$  NMR (50 MHz, Chloroform-*d*)  $\delta$  159.31, 137.65, 130.15, 128.63, 128.21, 127.70, 127.20, 126.62, 126.24, 114.14, 55.32 ppm.

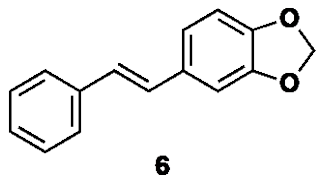

**(E)-5-Styrylbenzo[d][1,3]dioxole (6)**

Pale yellow solid;  $^1\text{H}$  NMR (200 MHz, Chloroform-*d*)  $\delta$  7.50-7.46 (m, 2H), 7.34-7.25 (m, 3H), 7.07 (d,  $J = 1.6$  Hz, 1H), 7.00-6.93 (m, 3H), 6.80 (d,  $J = 8.0$  Hz, 1H), 5.97 (s, 2H);  $^{13}\text{C}$  NMR (50 MHz, Chloroform-*d*)  $\delta$  148.14, 147.31, 137.40, 131.88, 128.65, 128.34, 127.35, 127.02, 126.29, 121.45, 108.41, 105.55, 101.11 ppm.

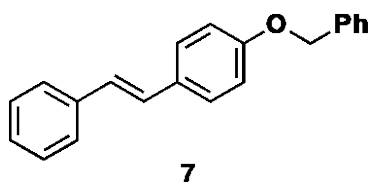

**(E)-1-(benzyloxy)-4-styrylbenzene (7)**

White solid.  $^1\text{H}$  NMR (400 MHz, Chloroform-*d*)  $\delta$  7.51-7.34 (m, 11H), 7.24 (d,  $J = 7.3$  Hz, 2H), 7.08 (d,  $J = 16.3$  Hz, 1H), 7.01-6.98 (m, 3H), 5.11 (s, 2H).  $^{13}\text{C}$  NMR (101 MHz, Chloroform-*d*)  $\delta$  158.46, 137.59, 136.86, 128.60, 128.14, 128.00, 127.71, 127.47, 126.71, 126.24, 115.05, 70.03 ppm.

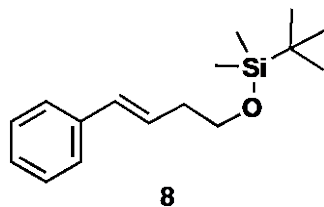

**(E)-tert-butyl dimethyl((4-phenylbut-3-en-1-yl)oxy)silane (8)**

Colourless liquid;  $^1\text{H}$  NMR (200 MHz, Chloroform-*d*)  $\delta$  7.37-7.29 (m, 5H), 6.45 (d,  $J = 15.8$  Hz, 1H), 6.30-6.19 (m, 1H), 3.74 (t,  $J = 6.7$  Hz, 2H), 2.44 (q,  $J = 6.9$  Hz, 2H), 0.92 (s, 9H), 5.76 (s, 6H);  $^{13}\text{C}$  NMR (50 MHz, Chloroform-*d*)  $\delta$  137.71, 131.62, 128.46, 126.94, 125.97, 125.01, 62.98, 36.92, 36.65, 25.95, 5.24 ppm.

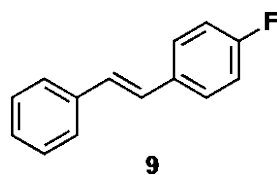

**(E)-1-fluoro-4-styrylbenzene (9)**

White solid;  $^1\text{H}$  NMR (200 MHz, Chloroform-*d*)  $\delta$  7.52-7.44 (m, 4H), 7.39-7.35 (m, 1H), 7.33-7.29 (m, 2H), 7.09-7.00 (m, 4H);  $^{13}\text{C}$  NMR (50 MHz, Chloroform-*d*)  $\delta$  164.78, 159.87, 137.16, 133.48, 128.69, 128.05, 127.89, 127.65, 127.47, 126.42, 115.81, 115.39 ppm.

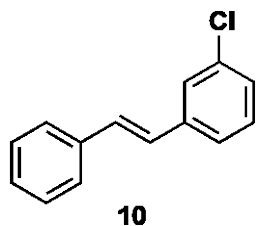

**(E)-1-chloro-4-styrylbenzene (10)**

White solid;  $^1\text{H}$  NMR (200 MHz, Chloroform-*d*)  $\delta$  7.53-7.49 (m, 3H), 7.40-7.20 (m, 6H), 7.12 (d,  $J = 16.2$  Hz, 1H), 7.01 (d,  $J = 16.4$  Hz, 1H);  $^{13}\text{C}$  NMR (50 MHz, Chloroform-*d*)  $\delta$ , 139.23, 136.80, 134.63, 130.12, 129.85, 128.74, 128.02, 127.47, 127.20, 126.64, 126.29, 124.73 ppm.

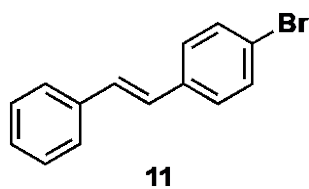

**(E)-1-bromo-4-styrylbenzene (11)**

White solid;  $^1\text{H}$  NMR (200 MHz, Chloroform-*d*)  $\delta$  7.52-7.46 (m, 3H), 7.41-7.26 (m, 6H), 7.10-7.06 (m, 2H);  $^{13}\text{C}$  NMR (50 MHz, Chloroform-*d*)  $\delta$  136.28, 131.77, 129.43, 128.73, 127.96, 127.89, 127.63, 127.40, 126.55 ppm.

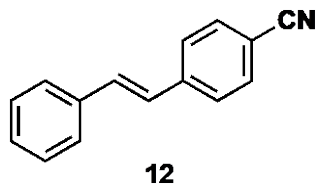

**(E)-4-styrylbenzonitrile (12)**

White solid;  $^1\text{H}$  NMR (200 MHz, Chloroform-*d*)  $\delta$  7.59-7.44 (m, 6H), 7.35-7.24 (m, 3H), 7.15 (d,  $J = 14.7$  Hz, 1H), 7.00 (d,  $J = 16.2$  Hz, 1H);  $^{13}\text{C}$  NMR (50 MHz, Chloroform-*d*)  $\delta$  141.80, 136.25, 132.44, 128.82, 128.61, 126.87, 126.83, 126.69, 118.99, 110.54 ppm.

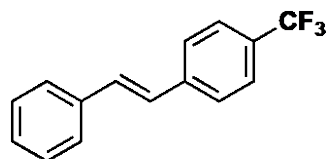

**13**

**(E)-1-styryl-4-(trifluoromethyl)benzene (13)**

White solid.  $^1\text{H}$  NMR (400 MHz, Chloroform-*d*)  $\delta$  7.62-7.54 (m, 6H), 7.42-7.32 (m, 3H), 7.22 (d,  $J = 16.4$  Hz, 1H), 7.13 (d,  $J = 16.4$  Hz, 1H).  $^{13}\text{C}$  NMR (101 MHz, Chloroform-*d*)  $\delta$  140.80, 136.62, 131.20, 128.79, 128.28, 127.11, 126.77, 126.56, 125.64, 125.60 ppm.

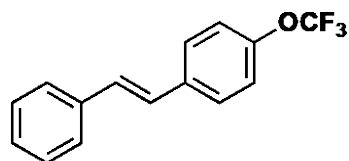

**14**

**(E)-1-styryl-4-(trifluoromethoxy)benzene (14)**

White solid.  $^1\text{H}$  NMR (400 MHz, Chloroform-*d*)  $\delta$  7.55-7.52 (m, 4H), 7.38 (t,  $J = 7.5$  Hz, 2H), 7.31-7.29 (m, 2H), 7.23-7.21 (m, 2H), 7.08 (s, 2H).  $^{13}\text{C}$  NMR (101 MHz, Chloroform-*d*)  $\delta$  148.45, 136.89, 136.10, 129.70, 128.74, 127.93, 127.65, 127.08, 126.57, 121.18 ppm.

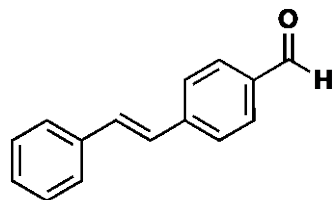

**15**

**(E)-4-styrylbenzaldehyde (15)**

Yellow solid.  $^1\text{H}$  NMR (400 MHz, Chloroform-*d*)  $\delta$  10.01 (s, 1H), 7.89 (d,  $J = 8.3$  Hz, 2H), 7.67 (d,  $J = 8.4$  Hz, 2H), 7.56 (d,  $J = 7.1$  Hz, 2H), 7.40 (t,  $J = 7.4$  Hz, 2H), 7.36-7.33 (m, 1H), 7.28 (d,  $J = 16.1$  Hz, 1H), 7.16 (d,  $J = 16.3$  Hz, 1H).  $^{13}\text{C}$  NMR (101 MHz, Chloroform-*d*)  $\delta$  191.662, 143.41, 136.51, 135.29, 132.18, 130.23, 128.82, 128.49, 127.31, 126.89 ppm. HRMS (ESI)  $m/z$ :  $[\text{M}+\text{H}]^+$  Calcd for  $\text{C}_{15}\text{H}_{12}\text{O}$  209.0961; Found 209.0954

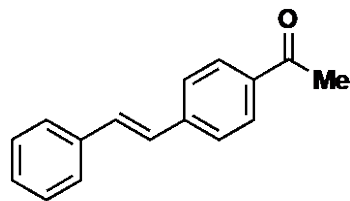

**16**

**(E)-1-(4-styrylphenyl) ethanone (16)**

White solid;  $^1\text{H}$  NMR (500 MHz, Chloroform-*d*)  $\delta$  7.88 (d,  $J = 8.39$  Hz 2H), 7.51 (d,  $J = 8.3$  Hz, 2H), 7.46 (d,  $J = 7.6$  Hz, 2H), 7.31 (t,  $J = 7.2$  Hz, 2H), 7.24-7.23 (m, 1H), 7.15 (d,  $J = 16.4$  Hz, 1H), 7.05 (d,  $J = 16.4$  Hz, 1H), 2.53 (s, 3H);  $^{13}\text{C}$  NMR (126 MHz, Chloroform-*d*)  $\delta$  197.46, 141.99, 136.67, 135.93, 131.45, 128.77, 128.29, 127.42, 126.79, 126.47, 26.56 ppm.

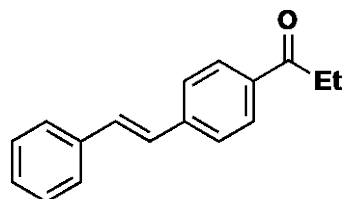

**17**

**(E)-1-(4-styrylphenyl) propan-1-one (17)**

White solid.  $^1\text{H}$  NMR (400 MHz, Chloroform-*d*)  $\delta$  8.01 (d,  $J = 8.4$  Hz, 2H), 7.54-7.46 (m, 4H), 7.35 (t,  $J = 7.5$  Hz, 2H), 7.29-7.21 (m, 1H), 7.18 (d,  $J = 16.3$  Hz, 1H), 7.09 (d,  $J = 16.3$  Hz, 1H), 4.36 (q,  $J = 7.1$  Hz, 2H), 1.38 (t,  $J = 7.1$  Hz, 3H).  $^{13}\text{C}$  NMR (101 MHz, Chloroform-*d*)  $\delta$  166.33, 141.63, 136.69, 131.05, 129.91, 1129.19, 128.70, 128.14, 127.52, 126.71, 126.21, 60.85, 14.30 ppm.

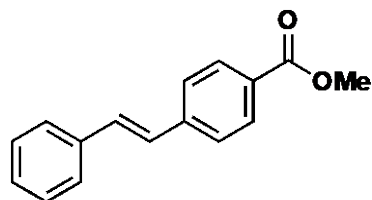

**18**

**(E)-methyl 4-styrylbenzoate (18)**

White solid;  $^1\text{H}$  NMR (500 MHz, Chloroform-*d*)  $\delta$  7.95 (d,  $J = 8.3$  Hz, 2H), 7.49-7.45 (m, 4H), 7.31-7.28 (t,  $J = 7.6$  Hz, 2H), 7.23-7.20 (m, 1H), 7.13 (d,  $J = 16.4$  Hz, 1H), 7.04 (d,  $J = 16.4$  Hz, 1H), 3.84 (s, 3H);  $^{13}\text{C}$  NMR (126 MHz, Chloroform-*d*)  $\delta$  166.87, 141.81, 136.73, 131.21, 130.01, 128.89, 128.76, 128.22, 127.54, 126.76, 126.29, 52.05 ppm.

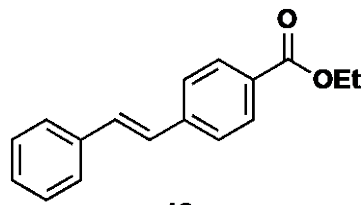

**19**

**(E)-Ethyl 4-styrylbenzoate (19)**

White solid;  $^1\text{H}$  NMR (200 MHz, Chloroform-*d*)  $\delta$  8.02 (d,  $J = 8.3$  Hz, 2H), 7.57-7.50 (m, 4H), 7.40-7.28 (m, 3H), 7.20 (d,  $J = 14.0$  Hz, 1H), 7.10 (d,  $J = 16.2$  Hz, 1H), 4.37 (q,  $J = 7.1$  Hz, 1H), 1.39 (s,  $J = 6.91$  Hz, 2H);  $^{13}\text{C}$  NMR (50 MHz, Chloroform-*d*)  $\delta$  166.35, 141.66, 136.73, 131.08, 129.94, 129.23, 128.72, 128.16, 127.57, 126.74, 126.23, 60.86, 14.31 ppm.

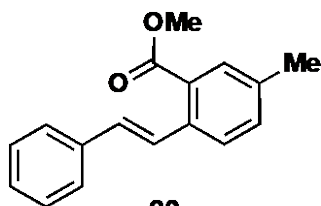

**20**

**methyl (E)-5-methyl-2-styrylbenzoate (20)**

Yellow liquid.  $^1\text{H}$  NMR (400 MHz, Chloroform-*d*)  $\delta$  7.96 (d,  $J = 16.2$  Hz, 1H), 7.75 (s, 1H), 7.64 (d,  $J = 8.0$  Hz, 1H), 7.55 (d,  $J = 7.5$  Hz, 2H), 7.36 (q,  $J = 8.7$  Hz, 3H), 7.28 (d,  $J = 8.6$  Hz, 2H), 6.99 (d,  $J = 16.2$  Hz, 1H), 3.94 (s, 3H), 2.40 (s, 3H).  $^{13}\text{C}$  NMR (101 MHz, Chloroform-*d*)  $\delta$  168.03, 137.06, 132.96, 131.05, 130.57, 128.61, 128.39, 127.64, 127.27, 126.84, 126.74, 52.06, 21.00 ppm.

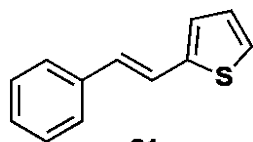

**21**

**(E)-2-styrylthiophene (21)**

Pale yellow solid;  $^1\text{H}$  NMR (200 MHz, Chloroform-*d*)  $\delta$  7.51-7.46 (m, 2H), 7.39-7.29 (m, 3H), 7.26-7.19 (m, 2H), 7.08 (d,  $J = 2.9$  Hz, 1H), 7.04-7.00 (m, 1H), 6.94 (d,  $J = 16.2$  Hz, 1H);  $^{13}\text{C}$  NMR (50 MHz, Chloroform-*d*)  $\delta$  142.87, 136.95, 128.68, 128.32, 127.57, 126.28, 126.07, 124.32, 121.76 ppm.



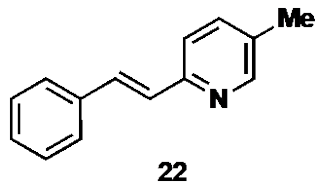

**(E)-5-methyl-2-styrylpyridine (22)**

Pale yellow solid;  $^1\text{H NMR}$  (500 MHz, Chloroform-*d*)  $\delta$  8.36 (s, 1H), 7.53-7.19 (m, 8H), 7.08 (d,  $J = 16.1$  Hz, 1H), 2.27 (s, 3H);  $^{13}\text{C NMR}$  (126 MHz, Chloroform-*d*)  $\delta$  153.02, 150.10, 137.03, 136.83, 131.65, 128.67, 127.93, 126.96, 121.51, 18.29 ppm.

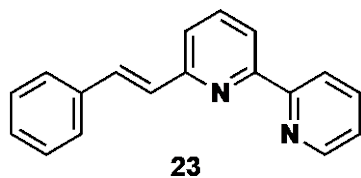

**(E)-6-styryl-2,2'-bipyridine (23)**

White solid.  $^1\text{H NMR}$  (400 MHz, Chloroform-*d*)  $\delta$  8.71-8.67 (m, 1H), 8.55 (dd,  $J = 28.3, 8.0$  Hz, 1H), 8.33 (dd,  $J = 40.5, 8.7$  Hz, 1H), 7.90-7.55 (m, 5H), 7.45-7.23 (m, 6H);  $^{13}\text{C NMR}$  (101 MHz, Chloroform-*d*)  $\delta$  154.92, 149.10, 142.84, 137.41, 136.87, 132.78, 132.07, 128.71, 128.37, 127.13, 123.72, 122.07, 121.29, 120.32, 119.46 ppm. HRMS (ESI)  $m/z$ :  $[\text{M}+\text{H}]^+$  Calcd for  $\text{C}_{18}\text{H}_{14}\text{N}_2$  259.1230; Found 259.1226

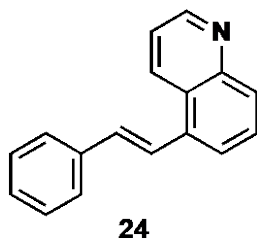

**(E)-5-styrylquinoline (24)**

Yellow solid.  $^1\text{H NMR}$  (400 MHz, Chloroform-*d*)  $\delta$  8.97 (d,  $J = 5.5$  Hz, 1H), 8.58 (d,  $J = 8.6$  Hz, 1H), 8.09 (d,  $J = 8.3$  Hz, 1H), 7.84-7.71 (m, 3H), 7.61 (d,  $J = 7.5$  Hz, 2H), 7.49-7.42 (m, 2H), 7.38 (d,  $J = 21.4$  Hz, 1H), 7.34-7.26 (m, 1H), 7.19 (d,  $J = 16.0$  Hz, 1H);  $^{13}\text{C NMR}$  (101 MHz, Chloroform-*d*)  $\delta$  150.24, 137.14, 135.36, 132.86, 132.22, 129.28, 129.16, 128.80, 128.12, 126.73, 124.17, 123.88, 120.92 ppm. HRMS (ESI)  $m/z$ :  $[\text{M}+\text{H}]^+$  Calcd for  $\text{C}_{17}\text{H}_{13}\text{N}$  232.1121; Found 232.1118

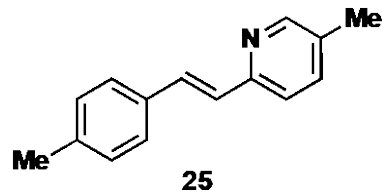

**(E)-5-methyl-2-(4-methylstyryl) pyridine (25)**

Brown solid.  $^1\text{H}$  NMR (400 MHz, Chloroform-*d*)  $\delta$  8.44 (s, 1H), 7.68 (d,  $J = 16.2$  Hz, 1H), 7.70-7.66 (m, 1H), 7.52-7.47 (m, 3H), 7.23-7.21 (m, 1H), 7.22 (d,  $J = 16.1$  Hz, 1H), 2.40 (s, 3H), 2.38 (s, 3H);  $^{13}\text{C}$  NMR (101 MHz, Chloroform-*d*)  $\delta$  151.71, 146.71, 139.25, 133.17, 132.37, 129.54, 127.41, 121.74, 21.39, 18.25 ppm.

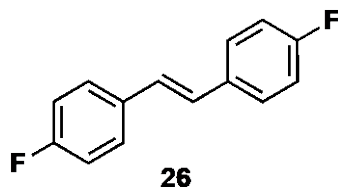

**(E)-1,2-bis(4-fluorophenyl) ethane (26)**

White solid;  $^1\text{H}$  NMR (200 MHz, Chloroform-*d*)  $\delta$  7.51-7.44 (m, 4H), 7.11-7.02 (m, 4H), 6.99 (s, 2H);  $^{13}\text{C}$  NMR (50 MHz, Chloroform-*d*)  $\delta$  164.80, 159.88, 133.38, 127.98, 127.82, 127.27, 115.85, 115.42 ppm.

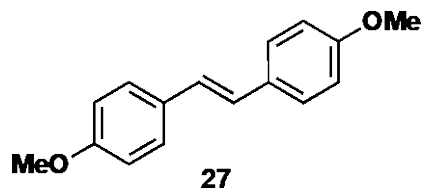

**(E)-1,2-bis(4-methoxyphenyl) ethene (27)**

White solid.  $^1\text{H}$  NMR (400 MHz, Chloroform-*d*)  $\delta$  7.44 (d,  $J = 8.7$  Hz, 4H), 6.97-6.85 (m, 6H), 3.84 (s, 6H).  $^{13}\text{C}$  NMR (101 MHz, Chloroform-*d*)  $\delta$  158.99, 130.48, 127.40, 126.17, 114.09, 55.31 ppm.

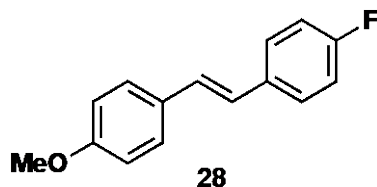

**(E)-1-fluoro-4-(4-methoxystyryl) benzene (28)**

Yellow solid.  $^1\text{H}$  NMR (400 MHz, Chloroform-*d*)  $\delta$  7.46 (dd,  $J = 8.6, 6.1$  Hz, 4H), 7.05 (t,  $J = 8.7$  Hz, 2H), 6.97 (d,  $J = 14.1$  Hz, 2H), 6.92 (d,  $J = 16.8$  Hz, 2H), 3.84 (s, 3H);  $^{13}\text{C}$  NMR (101 MHz, Chloroform-*d*)  $\delta$  159.31, 133.80, 129.96, 128.00, 127.62, 125.39, 115.63, 115.42, 114.14, 55.29 ppm. HRMS (ESI)  $m/z$ :  $[\text{M}+\text{H}]^+$  Calcd for  $\text{C}_{15}\text{H}_{13}\text{FO}$  229.1024; Found 229.1012

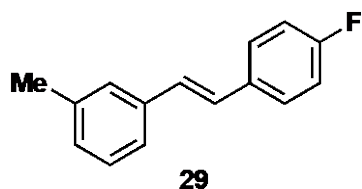

**(E)-1-(4-fluorostyryl)-3-methylbenzene (29)**

White solid.  $^1\text{H}$  NMR (400 MHz, Chloroform-*d*)  $\delta$  7.49 (dd,  $J = 8.6, 5.4$  Hz, 2H), 7.33-7.25 (m, 3H), 7.25 (d,  $J = 7.5$  Hz, 1H), 7.11-7.04 (m, 4H), 7.00 (d,  $J = 16.4$  Hz, 1H), 2.39 (s, 3H);  $^{13}\text{C}$  NMR (101 MHz, Chloroform-*d*)  $\delta$  163.51, 161.05, 138.24, 137.09, 133.61, 128.58, 128.48, 127.96, 127.25, 127.12, 123.62, 115.69, 115.47, 21.42 ppm.

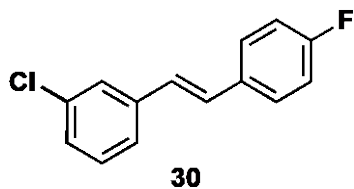

**(E)-1-chloro-3-(4-fluorostyryl)benzene (30)**

Colourless liquid.  $^1\text{H}$  NMR (400 MHz, Chloroform-*d*)  $\delta$  7.48 (dd,  $J = 8.6, 5.3$  Hz, 3H), 7.36 (d,  $J = 7.6$  Hz, 1H), 7.31-7.24 (m, 3H), 7.10-7.06 (m, 3H), 6.95 (d,  $J = 16.3$  Hz, 1H);  $^{13}\text{C}$  NMR (101 MHz, Chloroform-*d*)  $\delta$  163.76, 161.30, 139.04, 134.64, 132.99, 129.87, 128.85, 128.19, 127.51, 126.95, 126.19, 124.66, 115.81, 115.59 ppm.

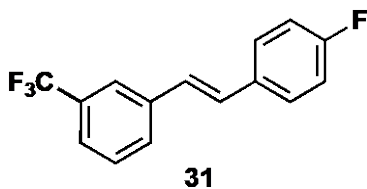

**(E)-1-fluoro-4-(4-(trifluoromethyl)styryl)benzene (31)**

White solid.  $^1\text{H}$  NMR (400 MHz, Chloroform-*d*)  $\delta$  7.63-7.58 (m, 4H), 7.53-7.50 (m, 2H), 7.16 (d,  $J = 16.3$  Hz, 1H), 7.09 (t,  $J = 8.7$  Hz, 2H), 7.04 (d,  $J = 16.4$  Hz, 1H);  $^{13}\text{C}$  NMR (101 MHz,

Chloroform-*d*)  $\delta$  163.90, 161.43, 140.61, 132.82, 129.91, 129.42, 129.10, 128.35, 128.27, 126.87, 126.48, 125.65, 122.84, 115.87, 115.65 ppm.

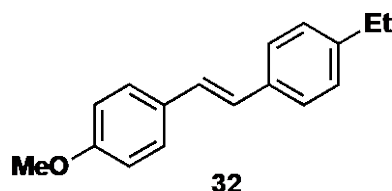

**(*E*)-1-ethyl-4-(4-methoxystyryl) benzene (32)**

White solid.  $^1\text{H}$  NMR (400 MHz, Chloroform-*d*)  $\delta$  7.45 (dd,  $J = 11.2, 8.4$  Hz, 4H), 7.20 (d,  $J = 8.1$  Hz, 2H), 7.05 (d,  $J = 16.3$  Hz, 1H), 6.98 (d,  $J = 16.3$  Hz, 1H), 6.92 (d,  $J = 8.7$  Hz, 2H), 3.85 (s, 3H), 2.67 (q,  $J = 7.6$  Hz, 2H), 1.27 (t,  $J = 7.6$  Hz, 3H);  $^{13}\text{C}$  NMR (101 MHz, Chloroform-*d*)  $\delta$  159.11, 143.45, 135.09, 130.33, 128.13, 127.56, 127.26, 126.55, 126.21, 114.08, 55.29, 28.60, 15.53 ppm. HRMS (ESI)  $m/z$ :  $[\text{M}+\text{H}]^+$  Calcd for  $\text{C}_{17}\text{H}_{18}\text{O}$  239.1431; Found 239.1427

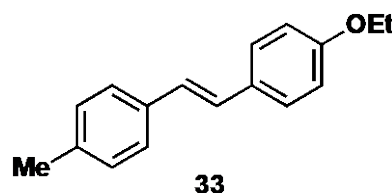

**(*E*)-1-ethoxy-4-(4-methylstyryl) benzene (33)**

White solid.  $^1\text{H}$  NMR (400 MHz, Chloroform-*d*)  $\delta$  7.44 (d,  $J = 8.7$  Hz, 2H), 7.40 (d,  $J = 8.1$  Hz, 2H), 7.17 (d,  $J = 7.9$  Hz, 2H), 7.03 (d,  $J = 16.3$  Hz, 1H), 6.96 (d,  $J = 16.3$  Hz, 1H), 6.90 (d,  $J = 8.8$  Hz, 2H), 4.07 (q,  $J = 7.0$  Hz, 2H), 2.37 (s, 3H), 1.44 (t,  $J = 7.0$  Hz, 3H);  $^{13}\text{C}$  NMR (101 MHz, Chloroform-*d*)  $\delta$  158.50, 137.00, 134.87, 130.15, 129.33, 127.54, 127.26, 126.41, 126.12, 114.63, 63.46, 21.21, 14.83 ppm. HRMS (ESI)  $m/z$ :  $[\text{M}+\text{H}]^+$  Calcd for  $\text{C}_{17}\text{H}_{18}\text{O}$  239.1431; Found 239.1427

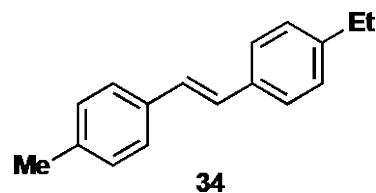

**(*E*)-1-ethyl-4-(4-methylstyryl) benzene (34)**

White solid.  $^1\text{H}$  NMR (400 MHz, Chloroform-*d*)  $\delta$  7.46 (dd,  $J = 9.8, 8.2$  Hz, 4H), 7.21 (dd,  $J = 10.6, 8.1$  Hz, 4H), 7.09 (s, 2H), 2.69 (q,  $J = 7.6$  Hz, 2H), 2.39 (s, 3H), 1.29 (t,  $J = 7.6$  Hz, 3H);  $^{13}\text{C}$  NMR (101 MHz, Chloroform-*d*)  $\delta$  143.66, 137.23, 134.96, 134.71, 129.34, 128.15, 127.61,

126.36, 28.61, 21.22, 15.54 ppm. HRMS (ESI)  $m/z$ :  $[M+H]^+$  Calcd for  $C_{17}H_{18}$  223.1482; Found 223.1469.

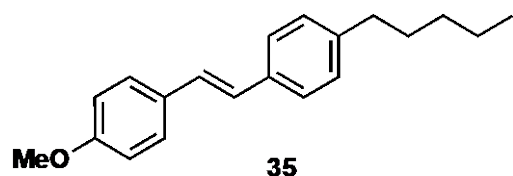

**(E)-1-methoxy-4-(4-pentylstyryl) benzene (35)**

White solid.  $^1H$  NMR (400 MHz, Chloroform-*d*)  $\delta$  7.43 (dd,  $J = 15.1, 8.4$  Hz, 4H), 7.17 (d,  $J = 8.1$  Hz, 2H), 7.04 (d,  $J = 16.3$  Hz, 1H), 6.97 (d,  $J = 16.4$  Hz, 1H), 6.95-6.89 (m, 2H), 3.84 (s, 3H), 2.63-2.59 (m, 2H), 1.67-1.63 (m, 2H), 1.36-1.33 (m, 4H), 0.92-0.89 (m, 3H);  $^{13}C$  NMR (101 MHz, Chloroform-*d*)  $\delta$  159.13, 142.23, 135.07, 130.38, 128.73, 127.59, 127.26, 126.62, 126.17, 114.11, 55.35, 35.70, 31.53, 31.16, 22.58, 14.07 ppm. HRMS (ESI)  $m/z$ :  $[M+H]^+$  Calcd for  $C_{20}H_{24}O$  281.1900; Found 281.1890.

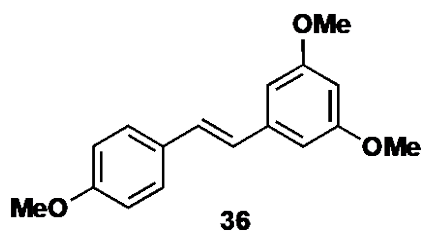

**(E)-1,3-dimethoxy-5-(4-methoxystyryl) benzene (36)**

Pale yellow liquid.  $^1H$  NMR (200 MHz, Chloroform-*d*)  $\delta = 7.55-7.41$  (m, 2H), 7.02 (s, 1H), 6.98-6.91 (m, 2H), 6.91-6.87 (m, 1H), 6.67 (d,  $J = 2.1$  Hz, 2H), 6.39 (t,  $J = 2.2$  Hz, 1H), 3.84 (s, 9H).  $^{13}C$  NMR (50 MHz, Chloroform-*d*)  $\delta$  161.97, 159.40, 139.70, 129.94, 128.74, 127.78, 126.58, 114.14, 104.35, 99.64, 55.35 ppm.

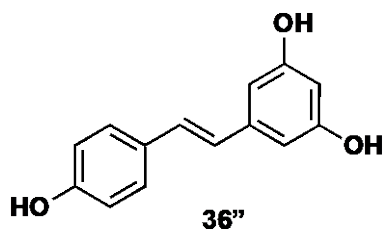

**(E)-5-(4-hydroxystyryl) benzene-1,3-diol (36'')**

White solid.  $^1\text{H}$  NMR (200 MHz,  $\text{DMSO-d}_6$ )  $\delta$  8.59 (s, 1H), 8.25 (s, 2H), 6.32 (d,  $J = 8.6$  Hz, 2H), 5.84-5.67 (m, 4H), 5.33 (s, 2H), 5.06-5.05 (m, 1H);  $^{13}\text{C}$  NMR (50 MHz,  $\text{DMSO-d}_6$ )  $\delta$  158.64, 157.33, 139.47, 128.27, 128.04, 125.81, 115.74, 104.53, 101.97 ppm.

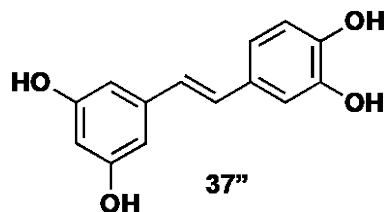

**(E)-4-(3,5-dihydroxystyryl)benzene-1,2-diol (37'')**

White solid,  $^1\text{H}$  NMR (400 MHz,  $\text{Methanol-d}_4$ )  $\delta$  6.98 (s, 1H), 6.91-6.73 (m, 2H), 6.44 (s, 2H), 6.16 (s, 1H) ppm.

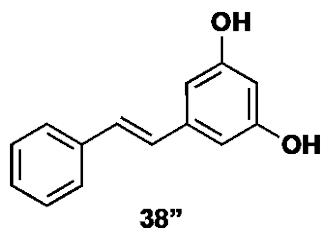

**(E)-5-styrylbenzene-1,3-diol (38'')**

White solid,  $^1\text{H}$  NMR (400 MHz,  $\text{Methanol-d}_4$ )  $\delta$  7.50 (d,  $J = 7.38$  Hz, 2H), 7.33 (t,  $J = 7.63$  Hz, 2H), 7.19-7.26 (m, 1H), 6.95-7.08 (m, 2H), 6.49 (d,  $J = 2.13$  Hz, 2H), 6.20 (t,  $J = 2.13$  Hz, 1H);  $^{13}\text{C}$  NMR ( $\text{Methanol-d}_4$ , 101MHz)  $\delta$  159.91, 140.90, 138.95, 130.08, 129.83, 129.60, 128.67, 127.61, 106.23, 103.36, 49.79, 49.58, 49.37, 49.15, 48.94, 48.72, 48.51 ppm.

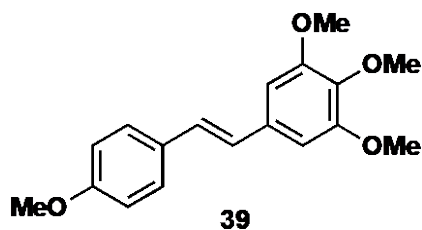

**(E)-1,2,3-trimethoxy-5-(4-methoxystyryl)benzene (39)**

White solid.  $^1\text{H}$  NMR (200 MHz,  $\text{Chloroform-d}$ )  $\delta$  7.46 (d,  $J = 8.8$  Hz, 2H), 6.96-6.89 (m, 3H), 6.73 (s, 2H), 3.92 (s, 6H), 3.88 (s, 3H), 3.84 (s, 3H);  $^{13}\text{C}$  NMR (50 MHz,  $\text{Chloroform-d}$ )  $\delta$  159.30, 153.39, 137.71, 133.43, 130.02, 127.74, 127.61, 126.55, 114.15, 103.37, 60.92, 56.11, 55.29 ppm.

## 6. DFT Studies and Reaction Mechanism

Full quantum chemical calculations were performed using density functional theory (DFT) at the dispersion and solvent-corrected PBE/TZVP level of theory to understand the mechanism (Figs. S27-S28) of the alkyne hydrogenation reaction in the presence of the Ni(II).dppe catalyst **I**. The values (in kcal/mol) were calculated at the PBE/TZVP level of theory with DFT, with methanol ( $\epsilon = 32.5$ ) modeled as the solvent. The reaction is initiated at the square planar complex **A** (precatalyst Ni(II)). In the presence of a methanol solvent, one of the chloride ligands is replaced by the methoxy group of MeOH (complex **II**). In the next step, complex **II** reacts with paraformaldehyde. The methoxy ligand of complex **II** is substituted by hydride *via* intermediate **III** to form a new Ni(II) catalyst **I**, which acts as the catalyst in the entire diphenylacetylene to (*E*)-stilbene transfer hydrogenation cycle.

In the first step of the catalytic cycle, diphenylacetylene **1a** approaches the square planar catalyst **I** and makes a square pyramidal  $\pi$ -complex, **Int-1** (Fig S28, Cycle B). The reaction free energy for this  $\pi$ -complex formation step is 3.0 kcal/mol, and this step goes through the transition state **TS1** with an activation free energy of 6.8 kcal/mol. In the next step, the reaction proceeds through **TS2** with an intramolecular rearrangement occurring, with the hydride being transferred from the Ni(II) center to one of the alkyne carbons. Consequently, the  $\pi$ -complex is broken, and the covalent Ni(II)-C bond (**Int-2**) is formed. The reaction free energy and the activation energy barriers are -22.3 kcal/mol and 12.5 kcal/mol, respectively. The next step, corresponding to the interaction of methanol with the Ni(II) center, leads to the formation of **Int-3**. The free energy increases by 3.8 kcal/mol. The distance between the Ni(II) center and the methanol oxygen is 3.75 Å, suggesting a weak interaction. This step proceeds *via* a four-membered transition state (**TS3**), where the proton is transferred to the alkyne carbon, along with the simultaneous breaking of the Ni(II)-C bond and the formation of the Ni(II)-O bond. Thus, (*Z*)-stilbene is formed, and catalyst **II** is regenerated. The free energy and activation energy barrier for the product formation step is 0.1 kcal/mol and 36.3 kcal/mol, respectively. These values indicate that the reaction would be favorable under the conditions.

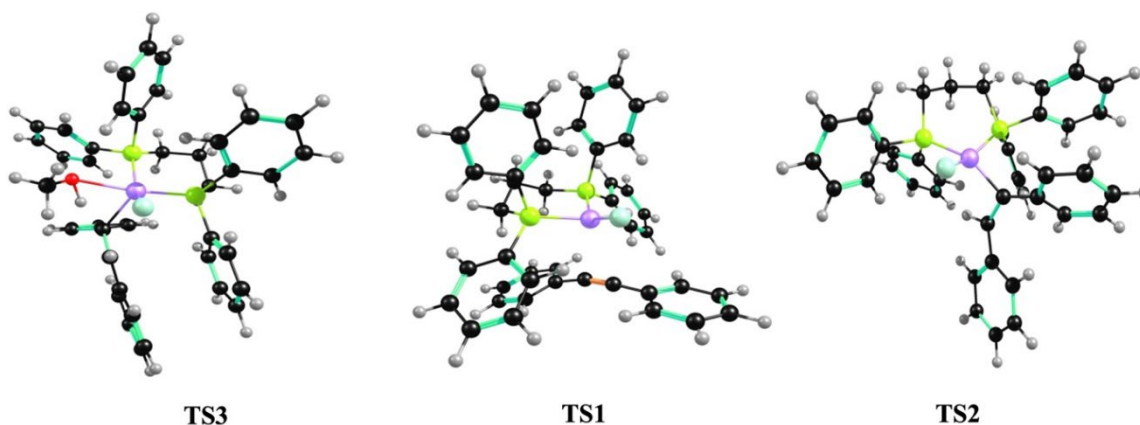

**Supplementary Figure S25.** Transition state geometries for the nickel catalyst.

The formation of (*E*)-stilbene may also be explained *via* the alkene isomerization cycle shown in Fig. S28 (Cycle C). In the first step of this cycle, the catalyst species **I** interact with (*Z*)-stilbene, leading to **Int-4**. This step is endergonic, with a binding free energy value of 2.3 kcal/mol, which compares well with the binding energy of diphenylacetylene to the catalyst **I** (3.0 kcal/mol) (in Cycle B, discussed above). The activation-free energy barrier for this step is 7.7 kcal/mol. In the next step, the hydride is transferred from Ni(II) of **Int-4** to the closest carbon of (*Z*)-stilbene, leading to **Int-5**. This hydrogenation by hydride transfer occurs through **TS5**, with a low activation barrier of 14.8 kcal/mol, and leads to sp<sup>3</sup> hybridization of the carbon atom of (*Z*)-stilbene. Rotation along the C–C bond of this complex leads to the conversion of **Int-5** to **Int-6** (Fig. S28, Cycle C). This step is thermodynamically a little endergonic by 1.2 kcal/mol. Now, in the next step, there are two possibilities: either β-H transfer to the Ni center from **Int-6** *via* **TS6** with a free energy barrier of 17.2 kcal/mol leading to (*E*)-stilbene (**Pdt**) and the regeneration of the catalyst **I** (shown in green in Fig. S27), or the complete hydrogenation *via* interaction of methanol with **Int-6** and the subsequent four-membered **TS6'**, where methanol transfers its proton to the carbon center and



the Ni(II)-C bond is broken at the same time, leading to the formation of the alkane (**Pdt'**) and the regeneration of the catalyst **II** (shown in red in Fig.S27). The free energy and activation energy barriers for these steps are 17.2 kcal/mol and 38.6 kcal/mol, respectively. Therefore, the complete hydrogenation pathway is thermodynamically and kinetically unfavorable than the  $\beta$ -H transfer step.

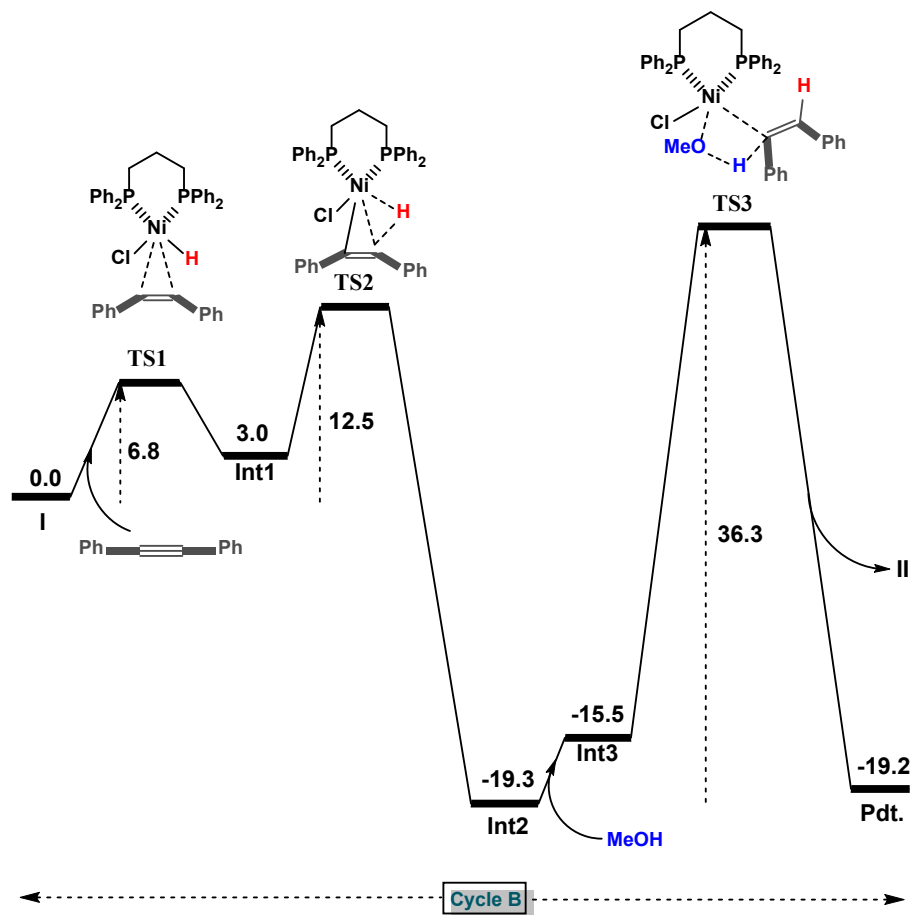

**Supplementary Figure S26.** The free energy profile for the catalytic semi-hydrogenation of diphenylacetylene by NiCl<sub>2</sub>.dppp.

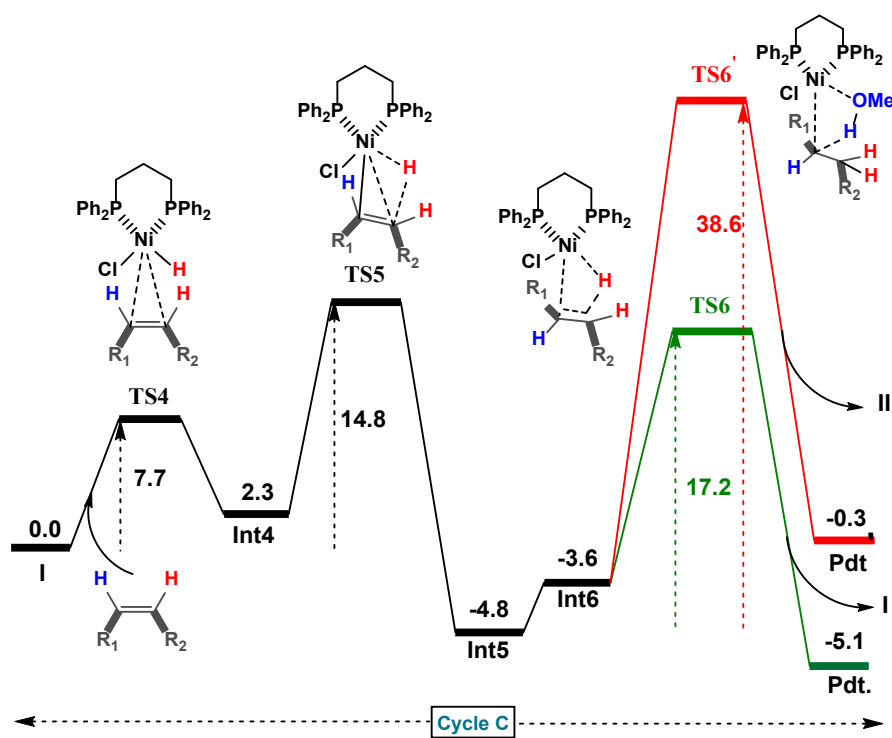

**Supplementary Figure S27.** The free energy profile for the catalytic isomerization of (*Z*)-stilbene into (*E*)-stilbene by NiCl<sub>2</sub>.dppp.

In DFT, it is a common issue to observe an overestimation of energy barriers when compared to experimentally calculated values, primarily due to its approximation-based nature. As a result, the absolute values obtained from DFT may not be entirely accurate. The exact energy barriers can be calculated using methods such as coupled cluster and full CI. However, these approaches are computationally intensive and are usually feasible only for small systems that are computationally less expensive to handle. Unfortunately, our reaction mechanisms involve complex steps in large systems, demanding high computational costs and time-consuming simulations. As a result, employing the more accurate but computationally demanding methods is not practical for our current study. However, for the current computational investigation's objective, which involves comparing relative barriers, DFT values serve their purpose.

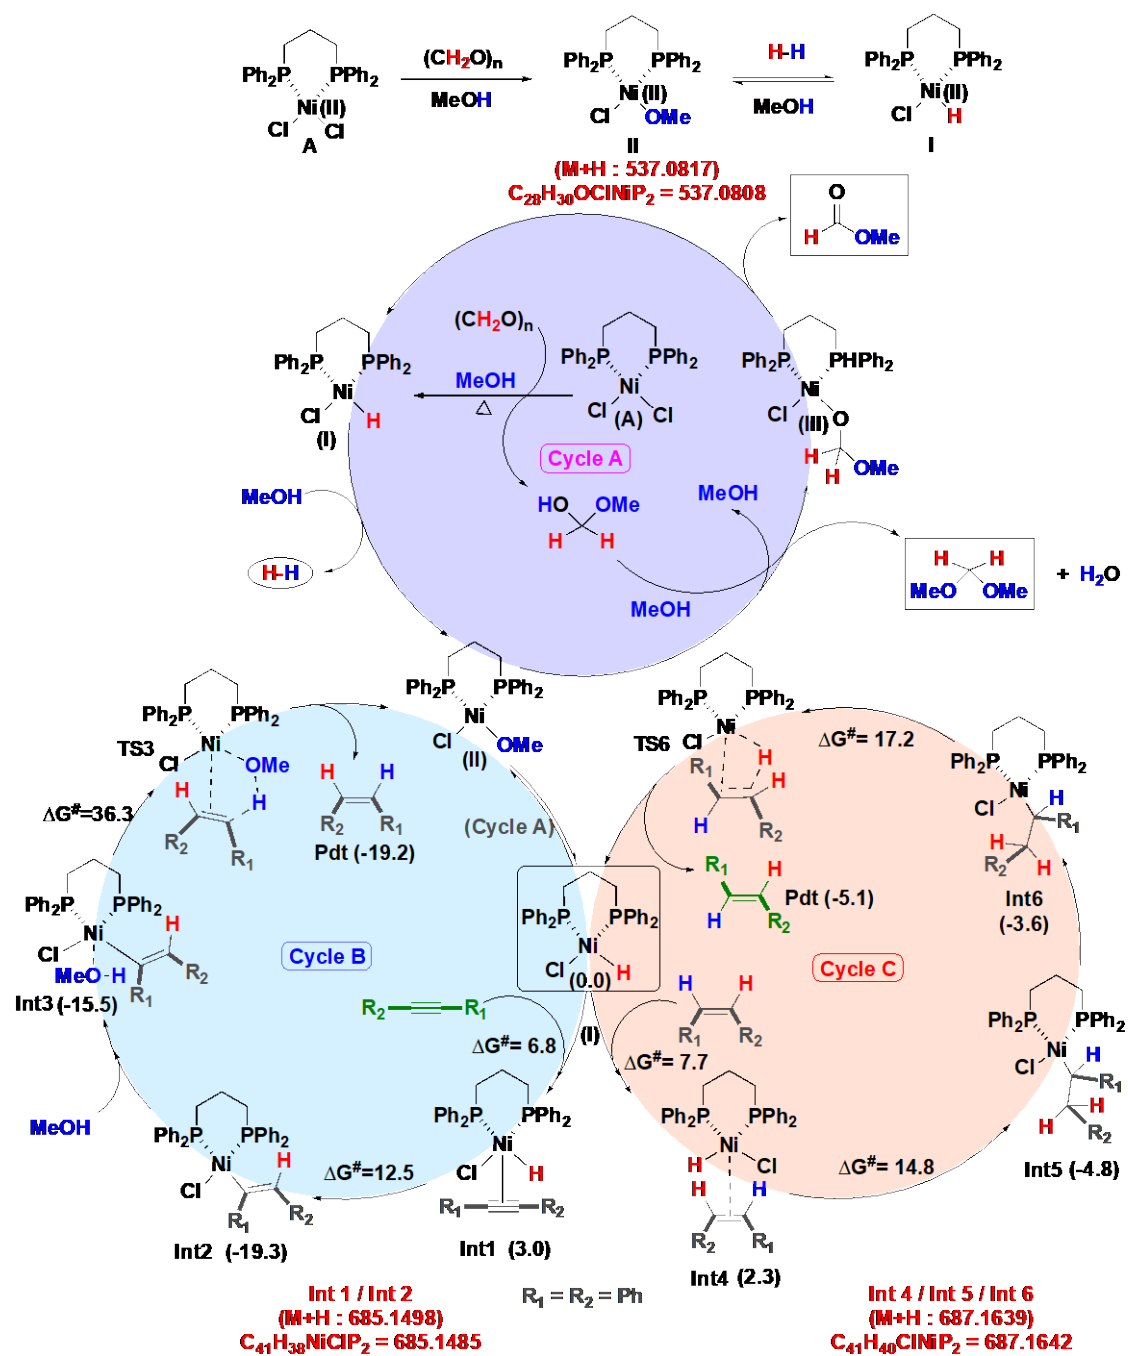

Supplementary Figure S28.

## 7. References

- (1) Ahlrichs, R.; Bar, M.; Häser, M.; Horn, H.; Kölmel, C. *Chem. Phys. Lett.* **1989**, *162*, 165–169.
- (2) Perdew, J. P.; Burke, K.; Ernzerhof, M. *Phys. Rev. Lett.* **1996**, *77*, 3865.
- (3) Ansgar, S.; Christian, H.; Reinhart, A. *J. Chem. Phys.* **1994**, *100*, 5829–5835.
- (4) Eichkorn, K.; Treutler, O.; Öhm, H.; Häser, M.; Ahlrichs, R. *Chem. Phys. Lett.* **1995**, *240*, 283–289.
- (5) Sierka, M.; Hogekamp, A.; Ahlrichs, R. *J. Chem. Phys.* **2003**, *118*, 9136–9148.
- (6) Klamt, A.; Schuurmann, G. *J. Chem. Soc., Perkin Trans.* **1993**, *2*, 799–805.
- (7) Ahlrichs, R., Bär, M., Häser, M., Horn, H. & Kölmel, C. Electronic structure calculations on workstation computers: the program system turbomole, *Chem. Phys. Lett.* **1989**, *162*, 165–169.
- (8) Perdew, J. P., Burke, K. & Ernzerhof, M. Generalized gradient approximation made simple, *Phys. Rev. Lett.* **1996**, *77*, 3865–3868.
- (9) Klamt, A. & Schuurmann, G. COSMO: A new approach to dielectric screening in solvents with explicit expressions for the screening energy and its gradient, *J. Chem. Soc. Perkin Trans.* **1993**, *2*, 799–805.
- (10) P.M. Zimmerman, A. Paul, Z. Zhang, C.B. Musgrave, Oligomerization and autocatalysis of  $\text{NH}_2\text{BH}_2$  with ammonia-borane, *Inorg. Chem.* **2009**, *48*, 1069–1081.
- (11) S. Kozuch, S. E. Lee, and S. Shaik, “Theoretical Analysis of the Catalytic Cycle of a Nickel Cross-Coupling Process: Application of the Energetic Span Model”, *Organometallics* **2009**, *28*, 1303–1308.
- (12) M.T. Nguyen, V.S. Nguyen, M.H. Matus, G. Gopakumar, D.A. Dixon, Molecular mechanism for  $\text{H}_2$  release from  $\text{BH}_3\text{NH}_3$ , including the catalytic role of the lewis acid  $\text{BH}_3$ , *J. Phys. Chem. A* **2007**, *111*, 679–690.

## 8. $^1\text{H}$ and $^{13}\text{C}$ Spectra

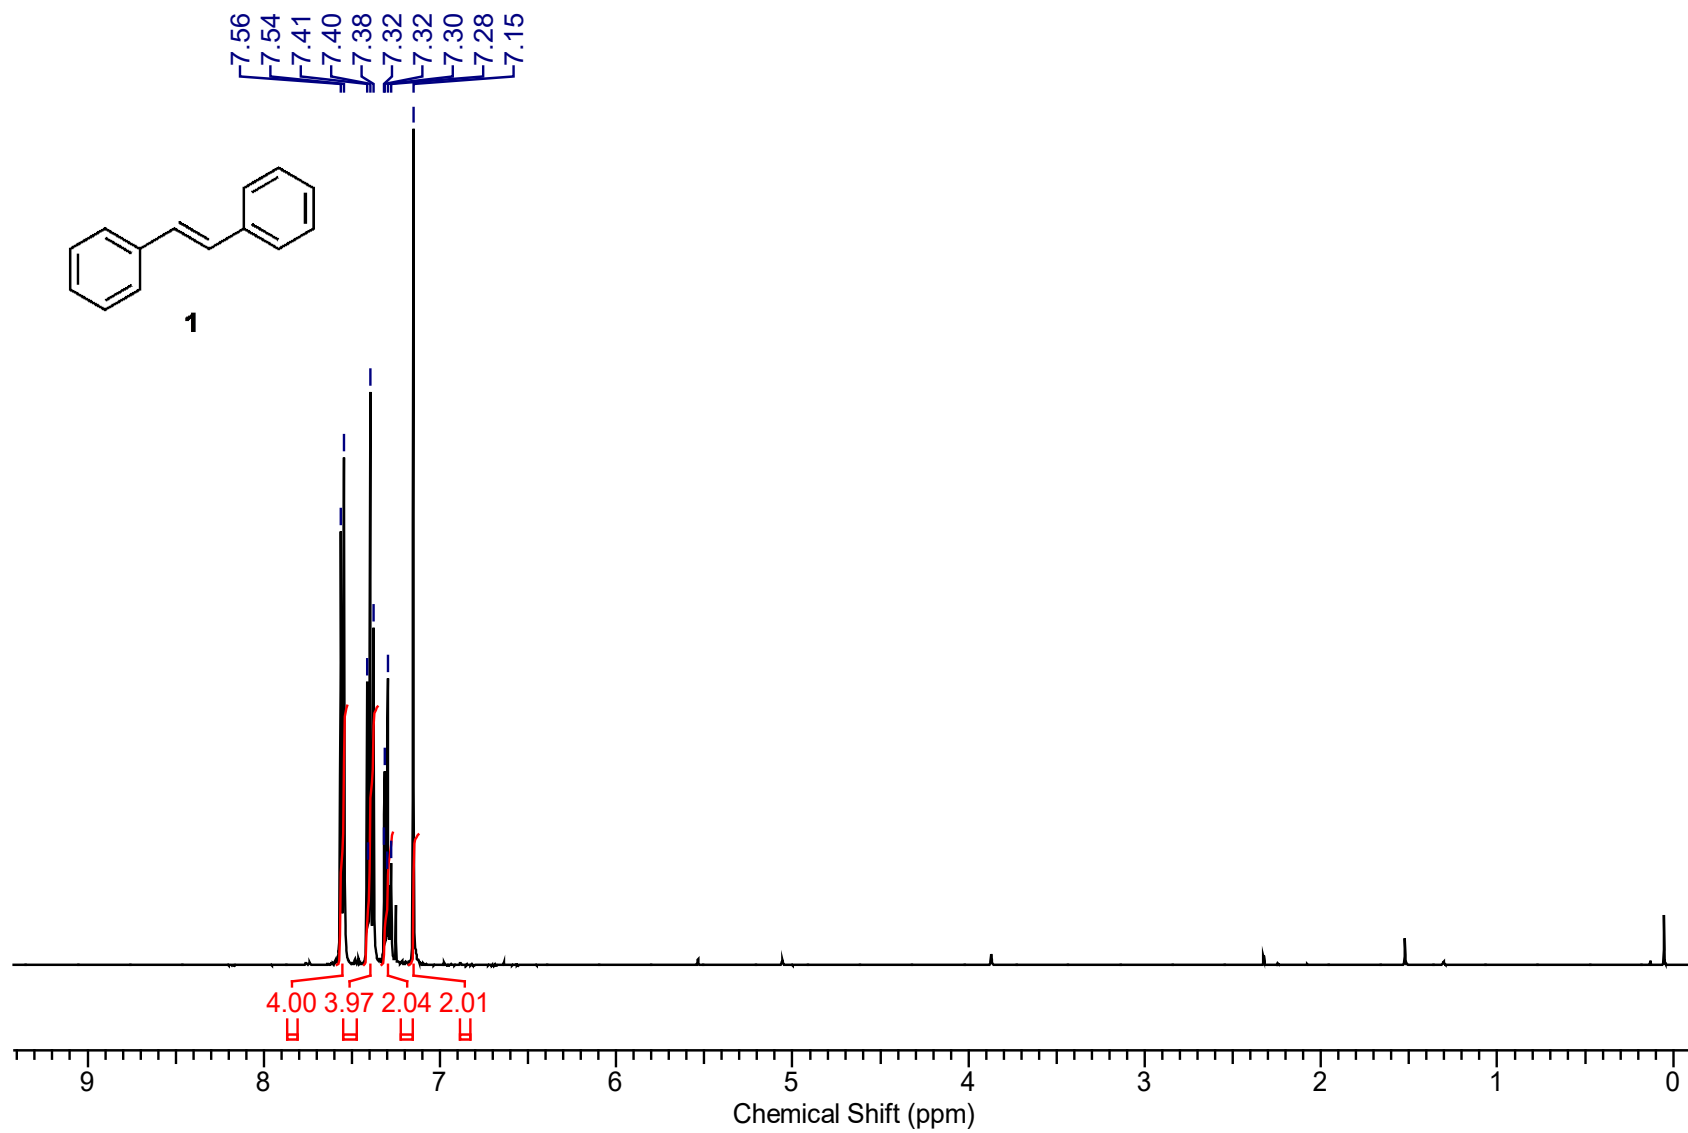

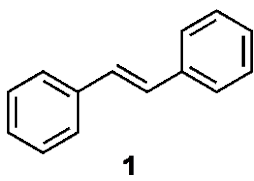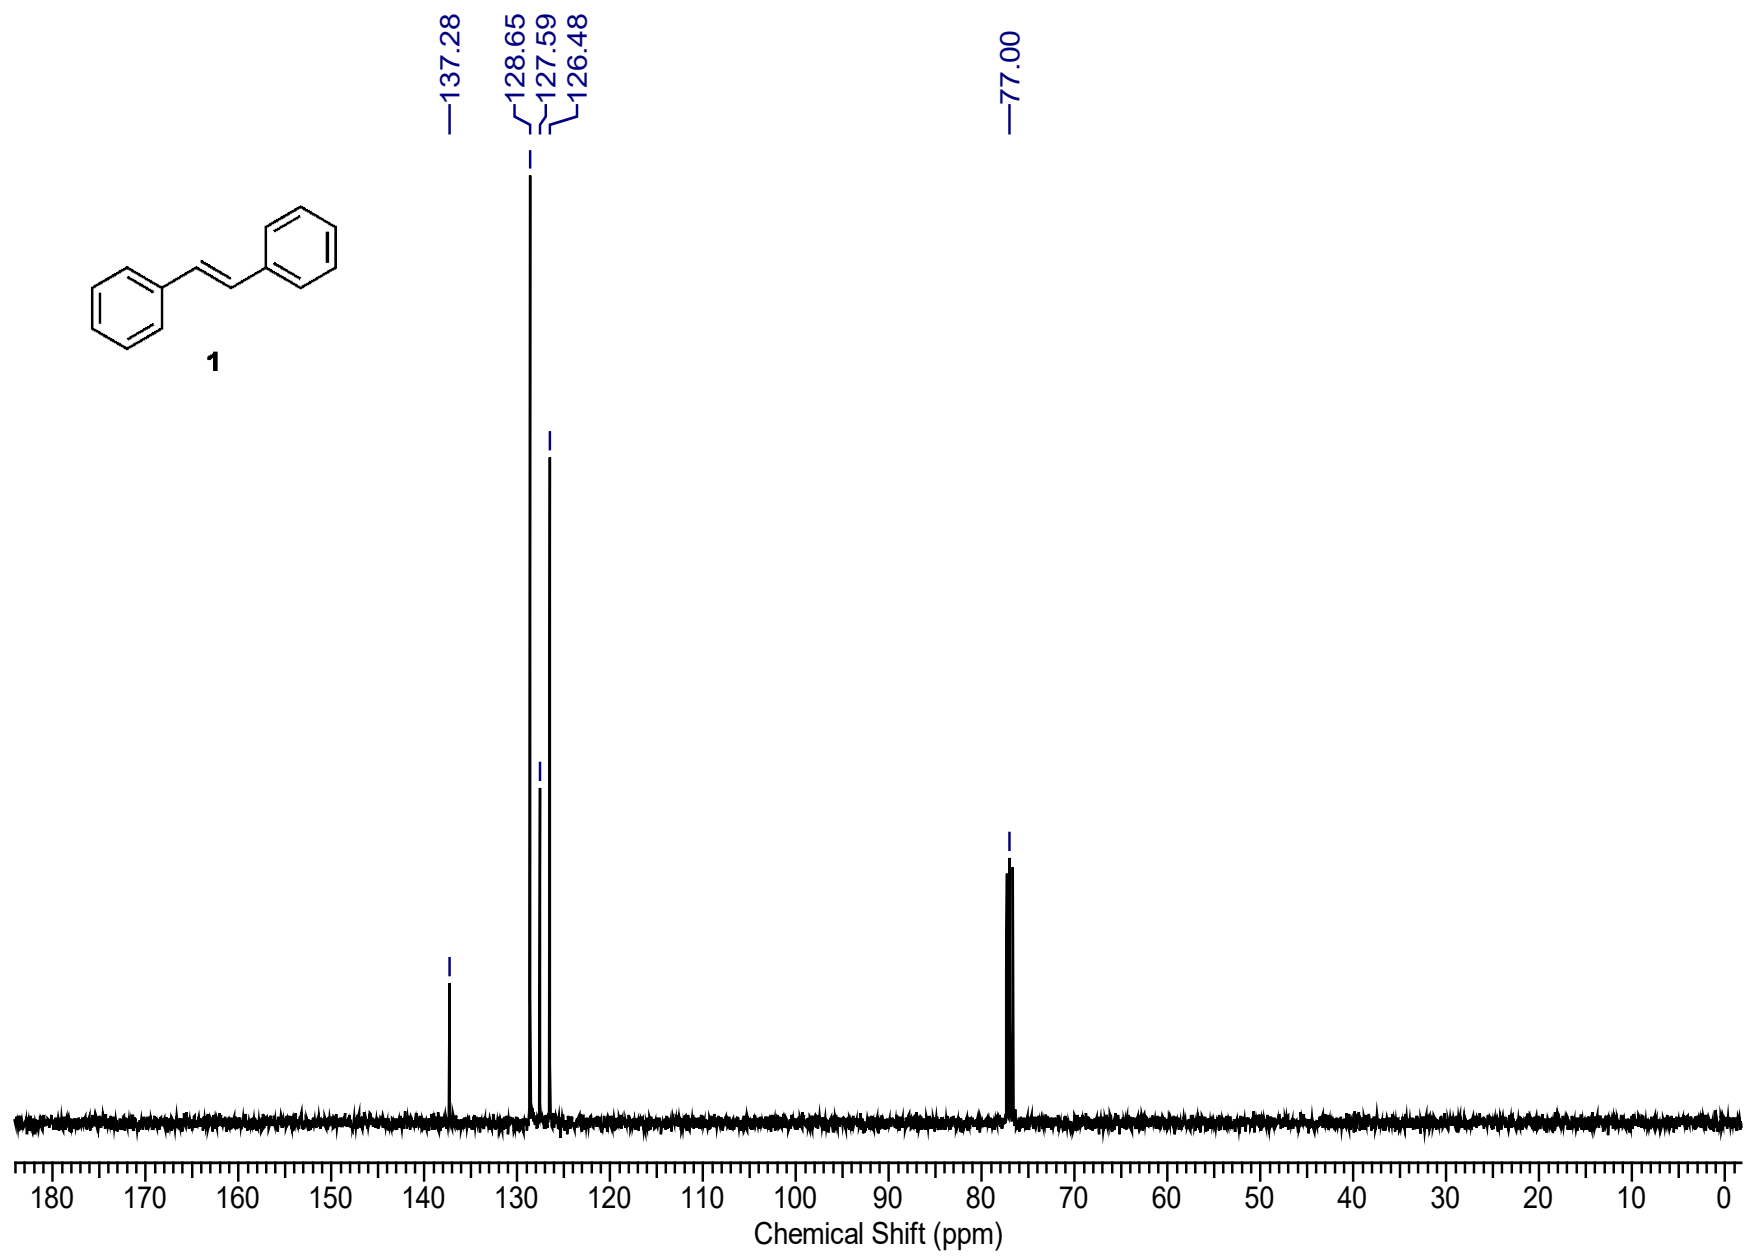

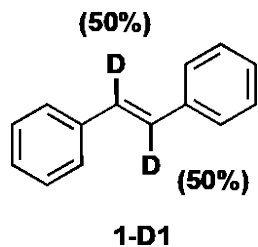

7.54  
7.54  
7.50  
7.50  
7.36  
7.35  
7.32  
7.29  
7.25  
7.11

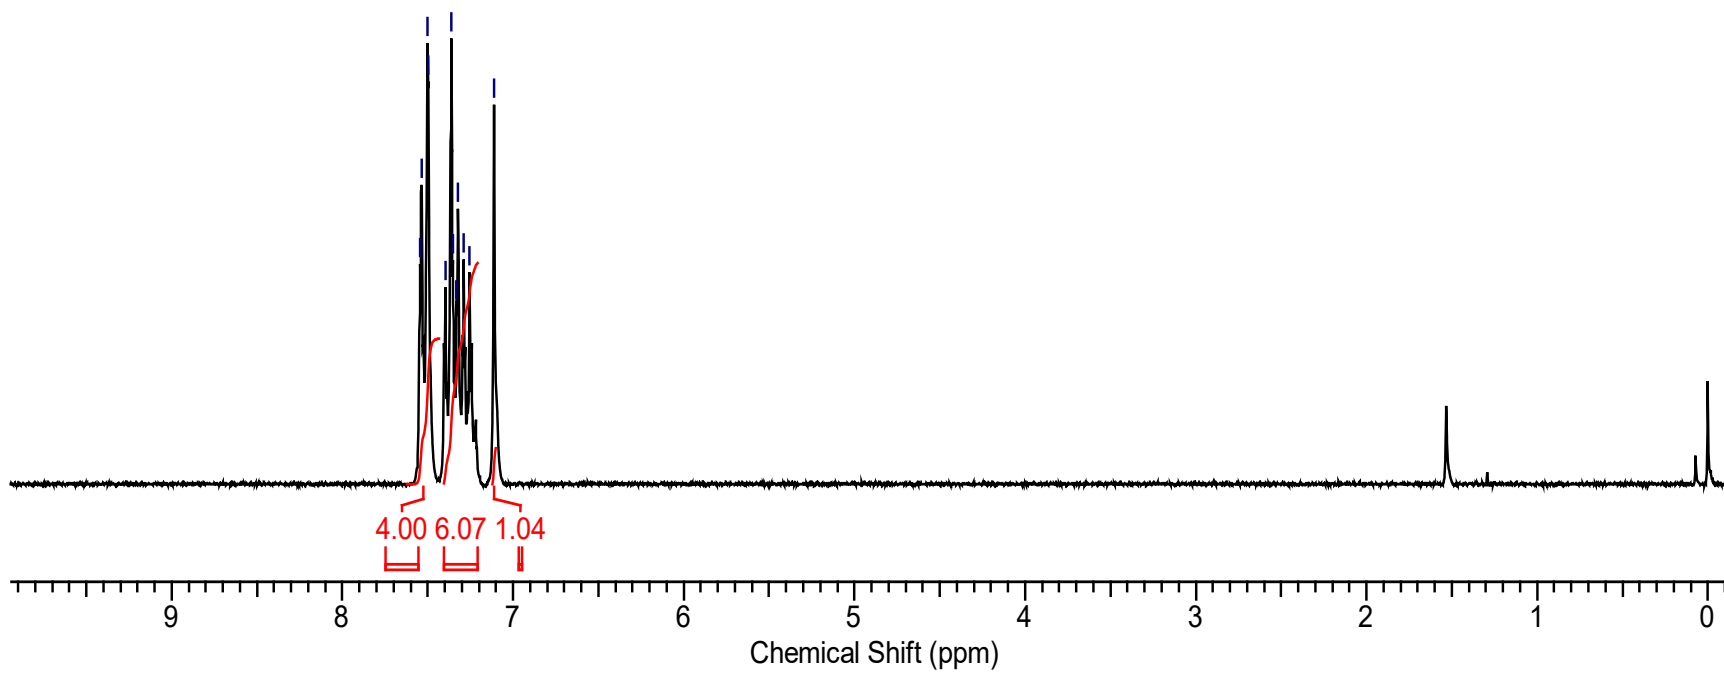

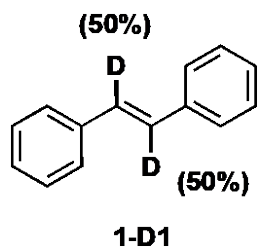

—137.32

—128.68

—127.61

—126.50

—77.00

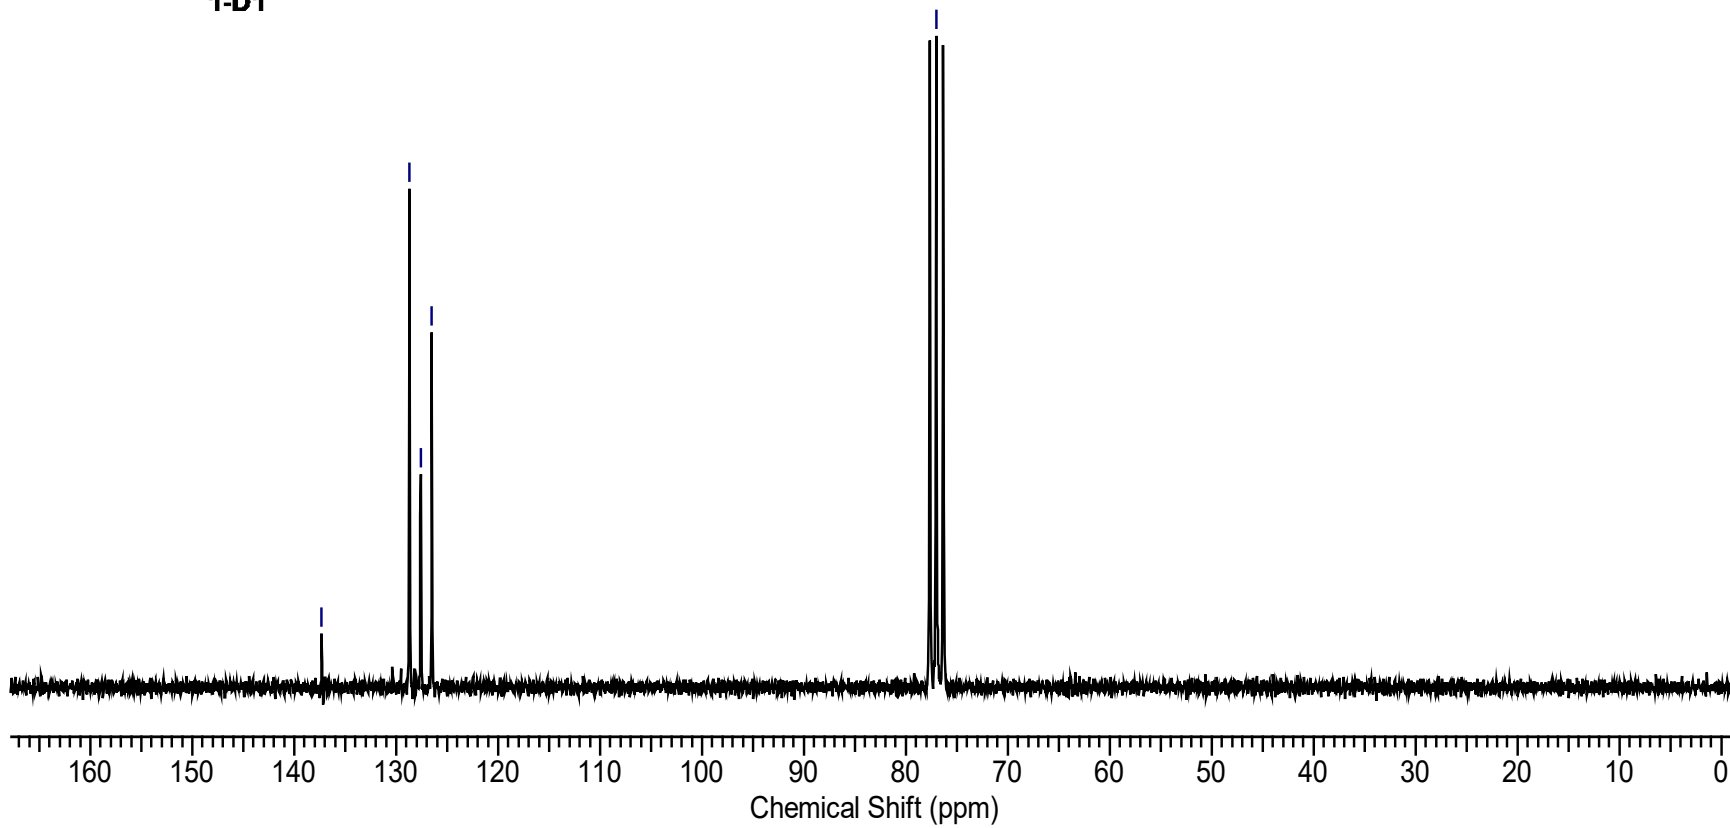



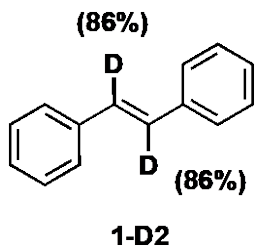

7.55  
7.53  
7.40  
7.38  
7.36  
7.30  
7.28  
7.13

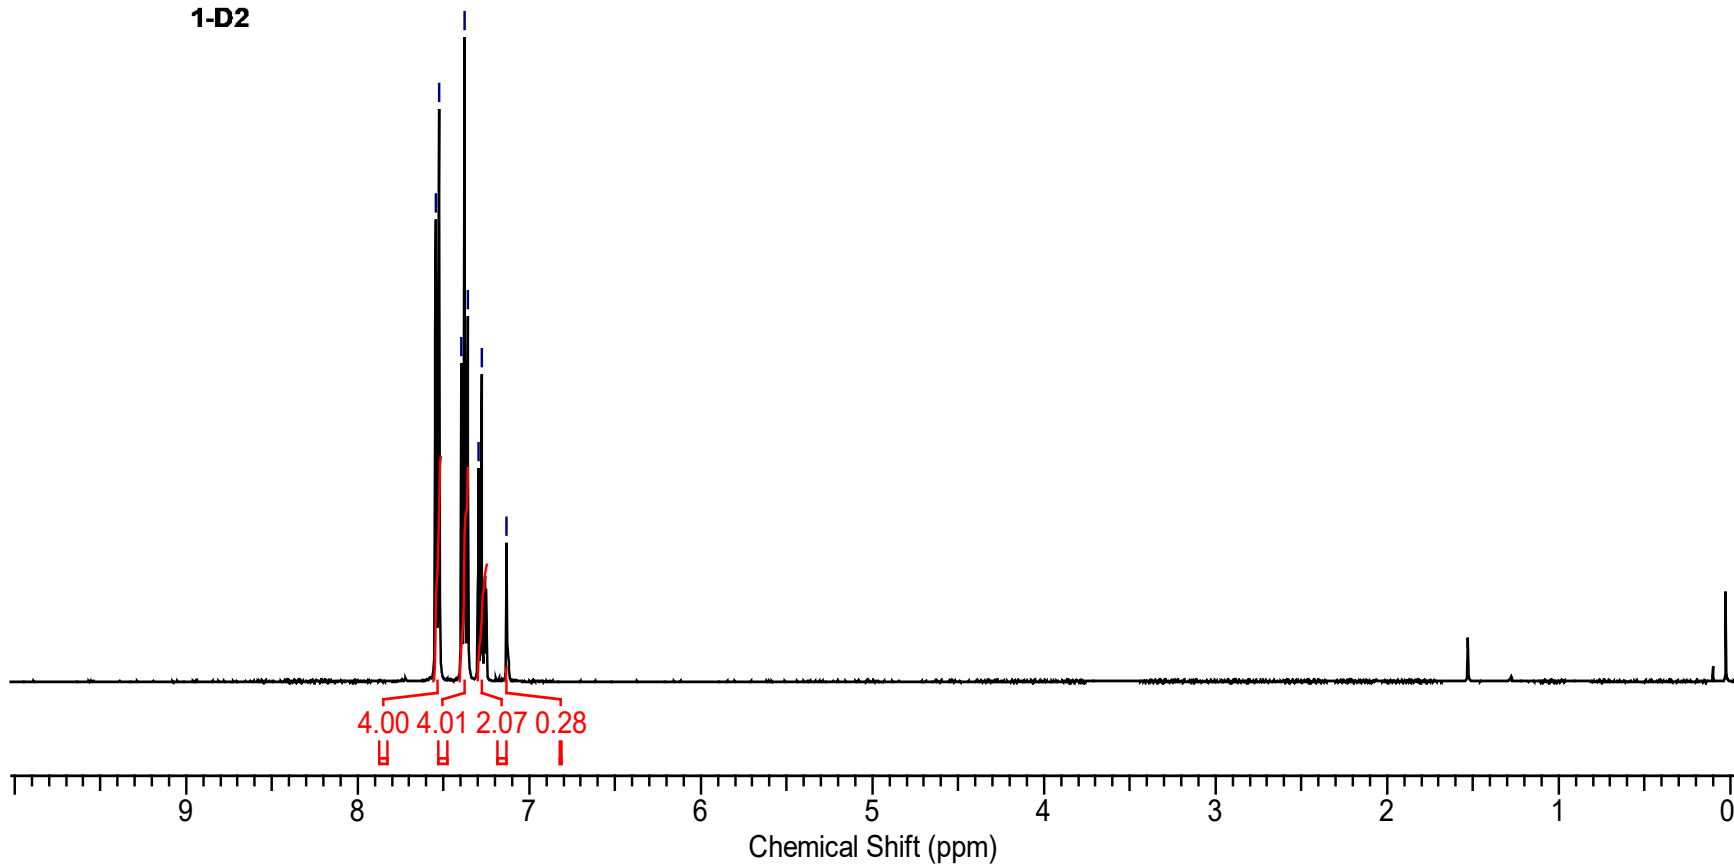

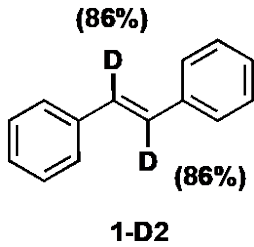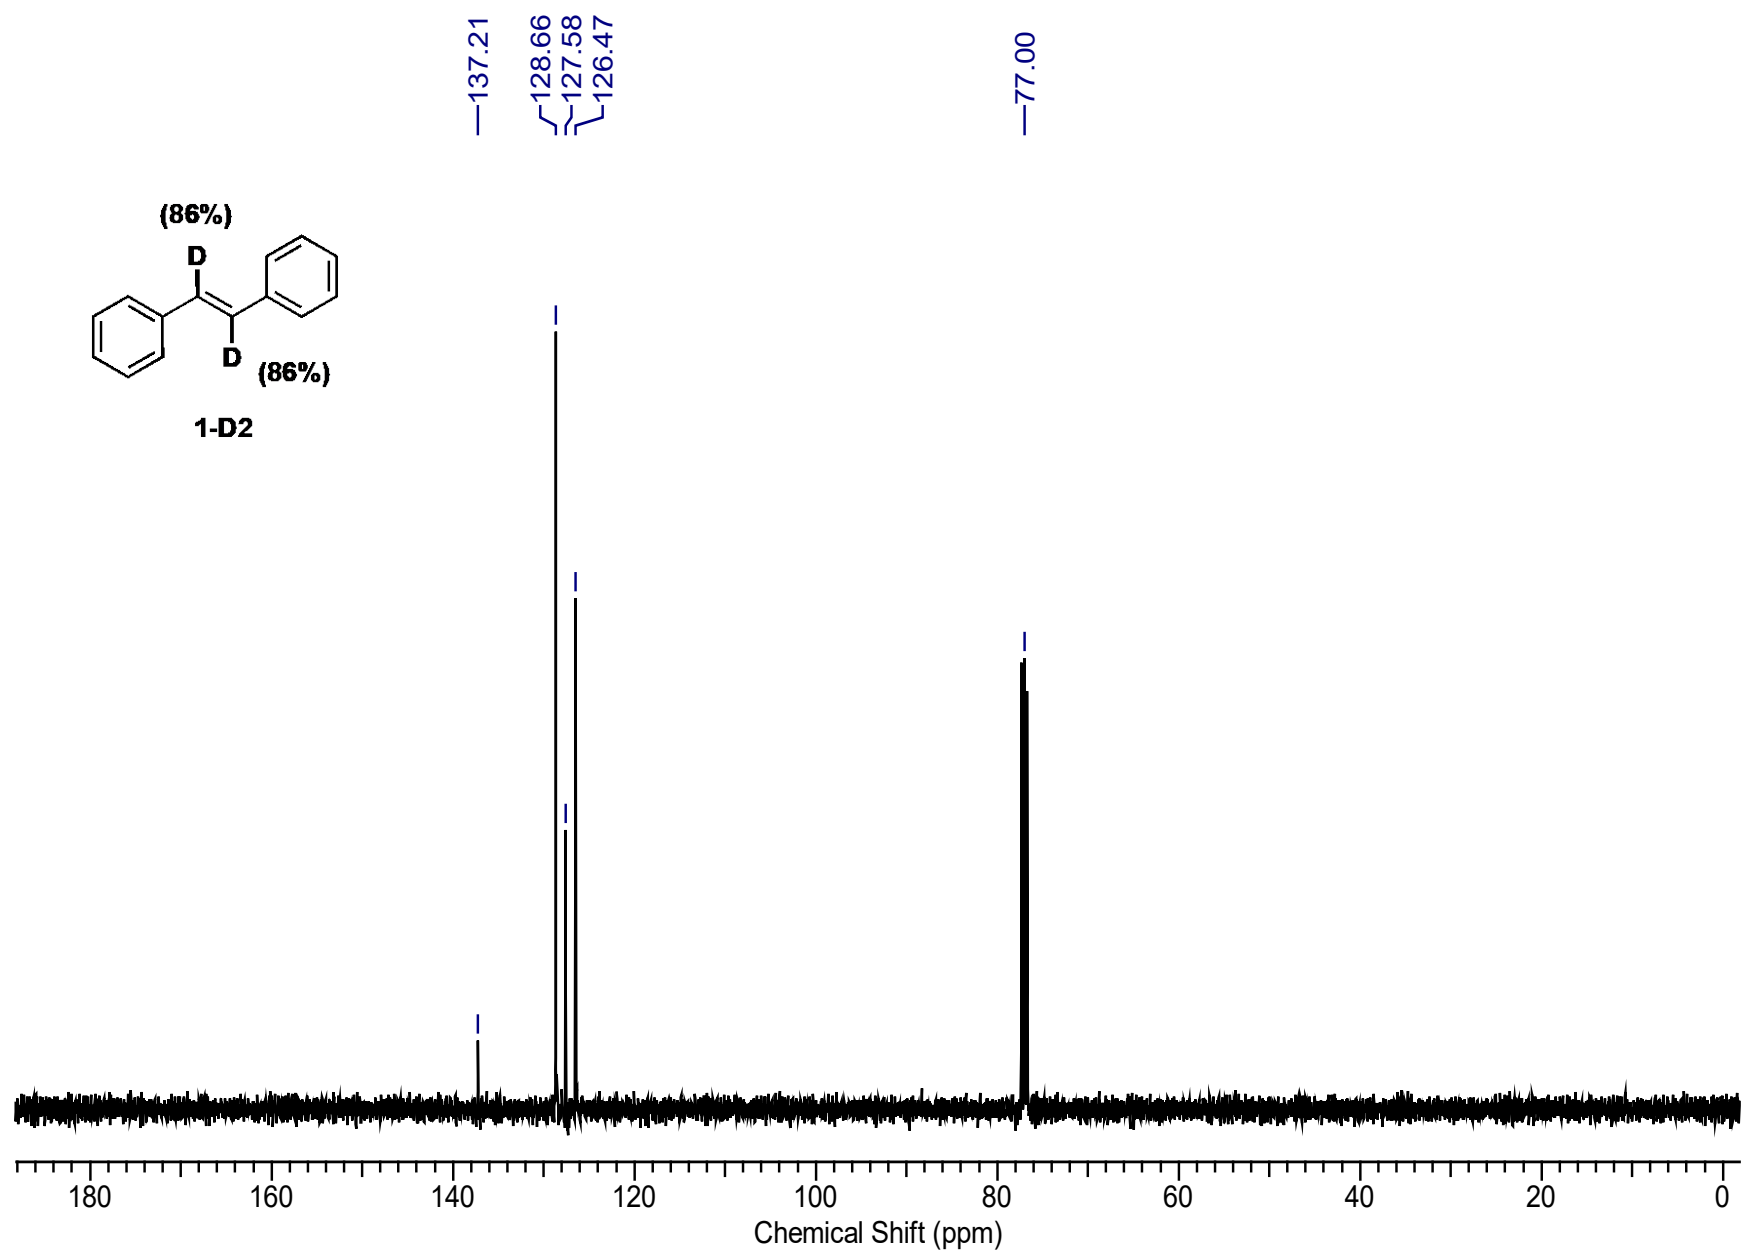

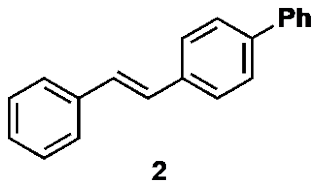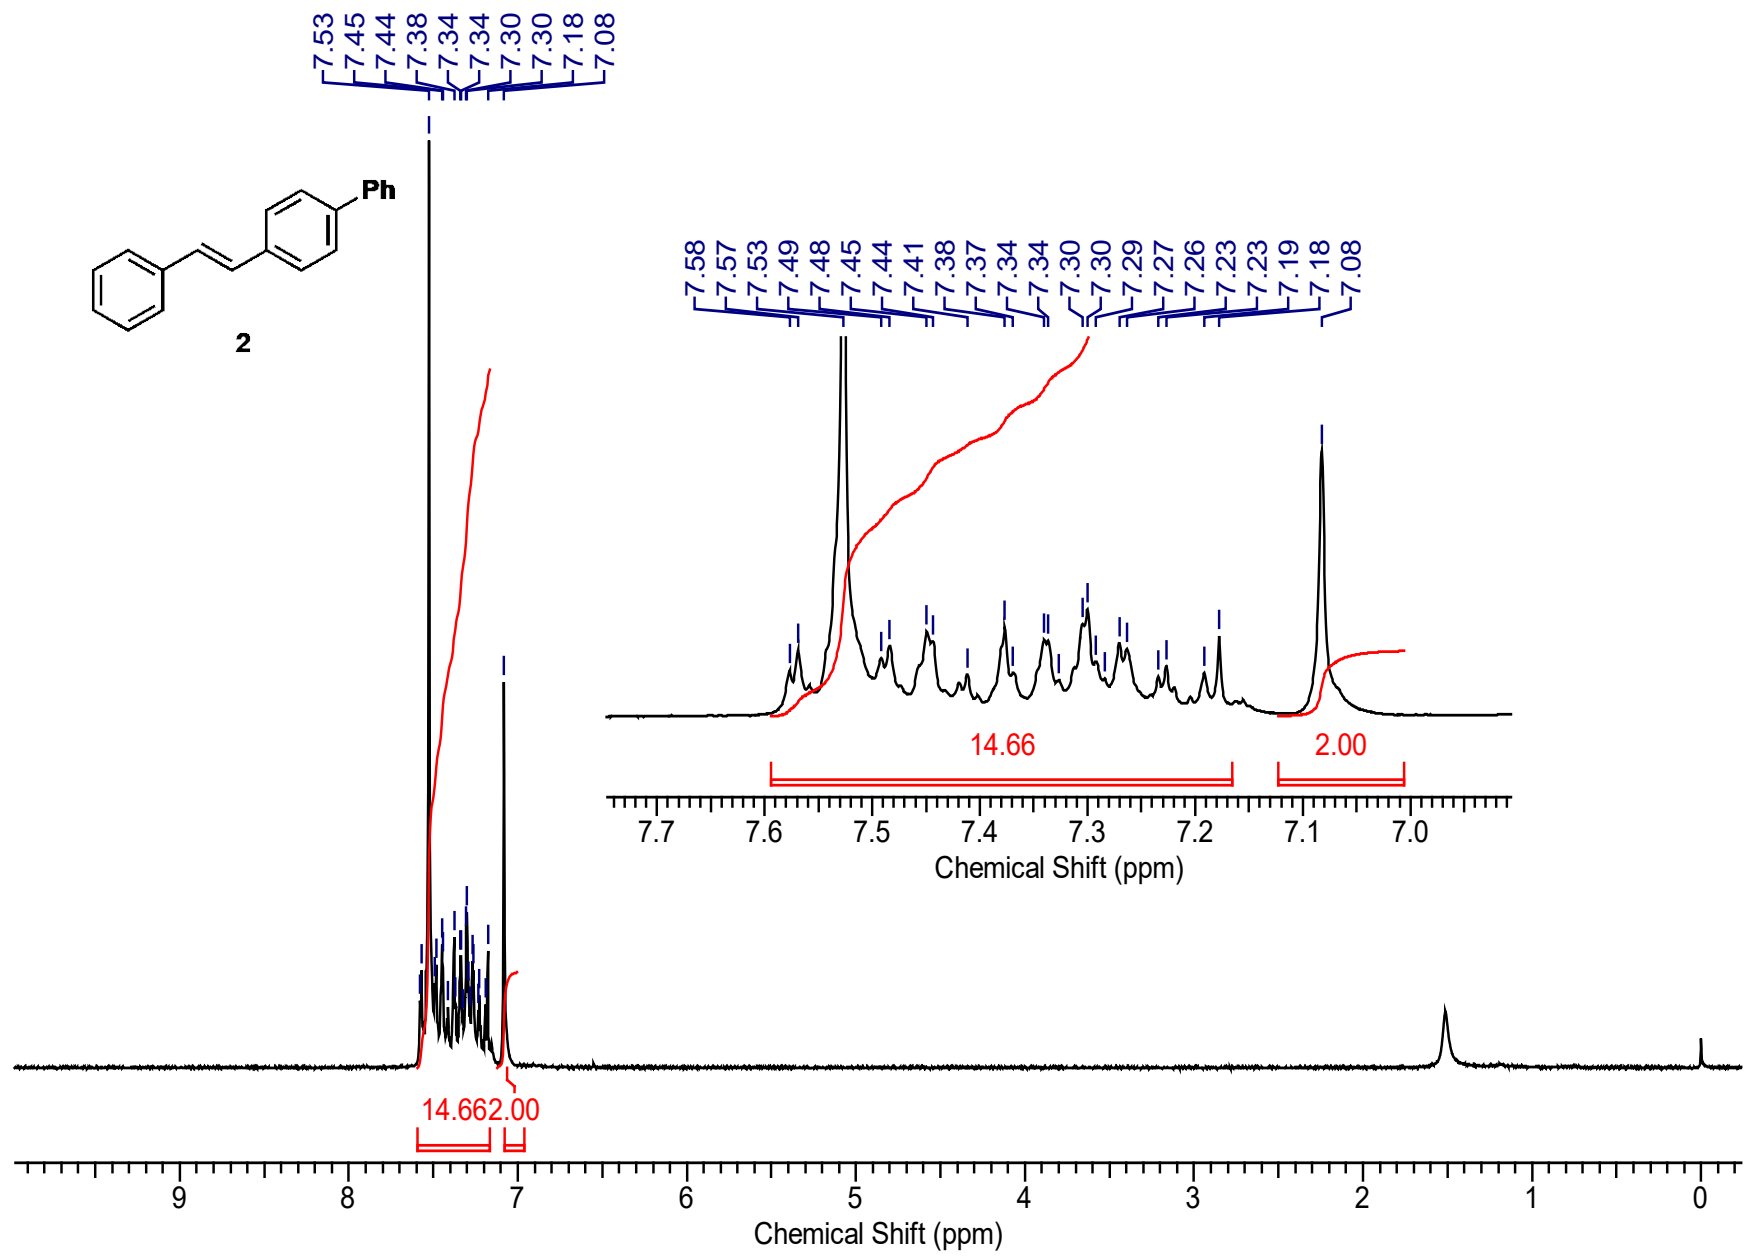

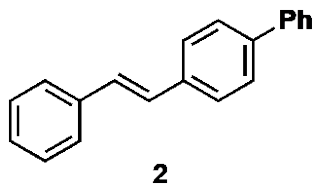

140.67  
140.33  
137.32  
136.38  
128.79  
128.70  
128.19  
127.65  
127.34  
126.92  
126.52

—77.00

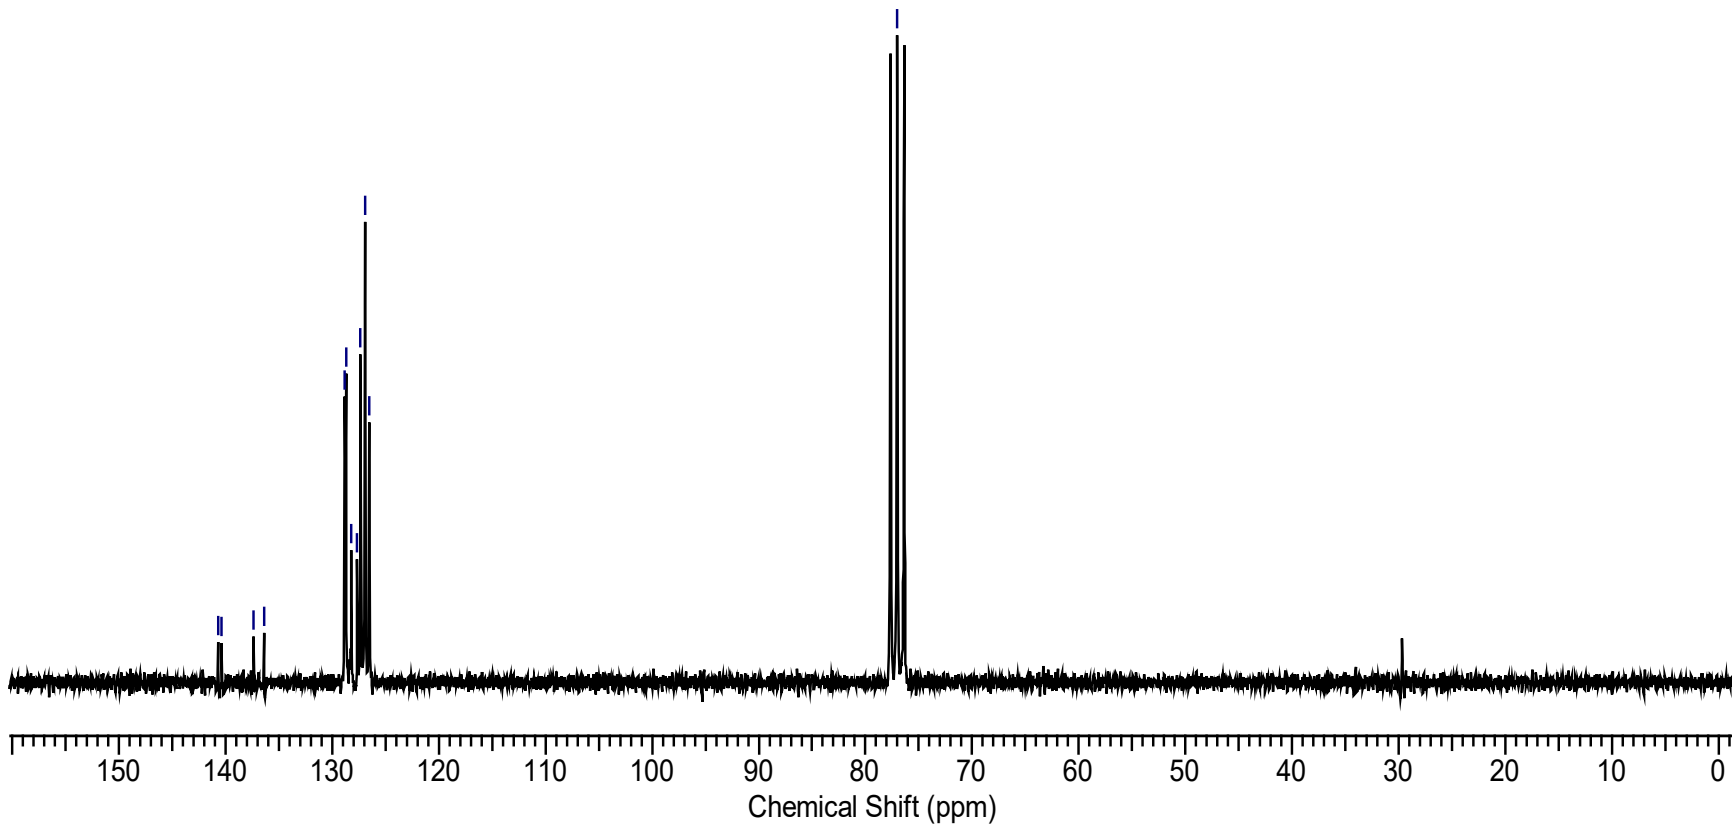

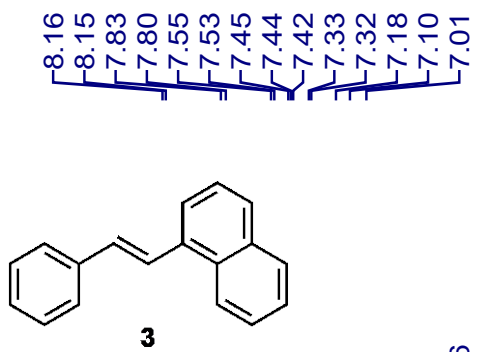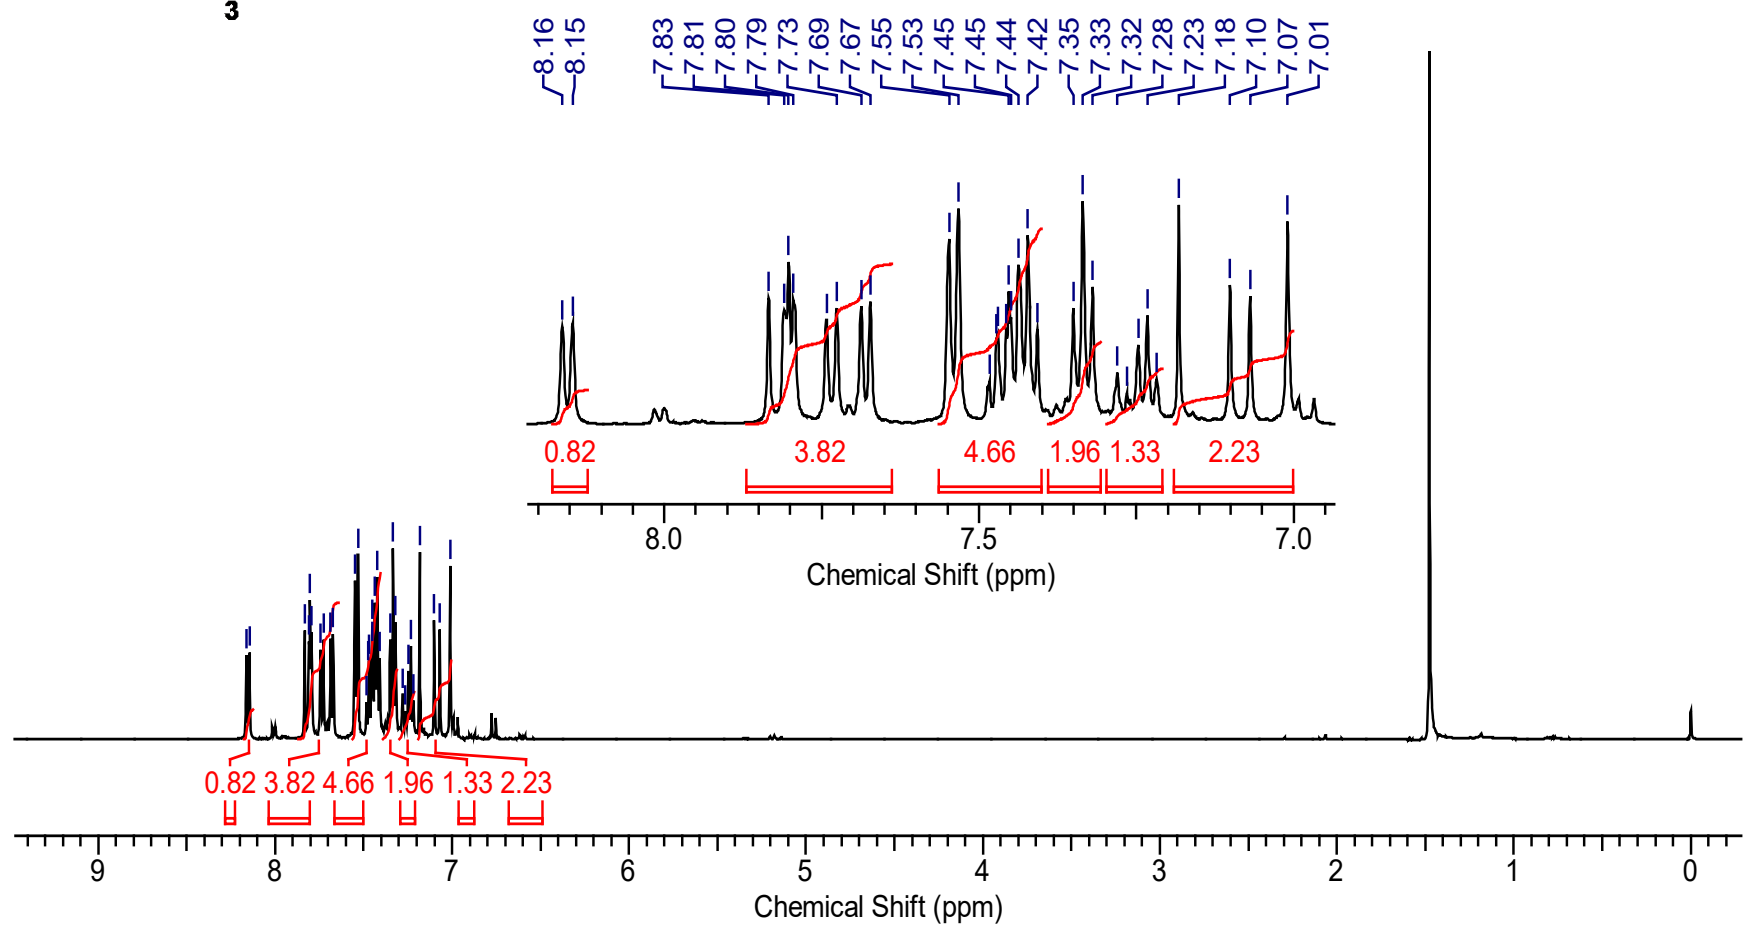

137.61  
135.02  
131.77  
129.04  
128.74  
128.03  
127.77  
126.68  
125.82  
125.69  
123.77  
123.62

77.25  
77.00  
76.74

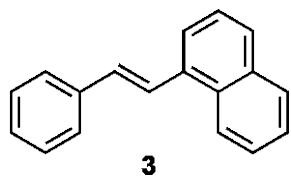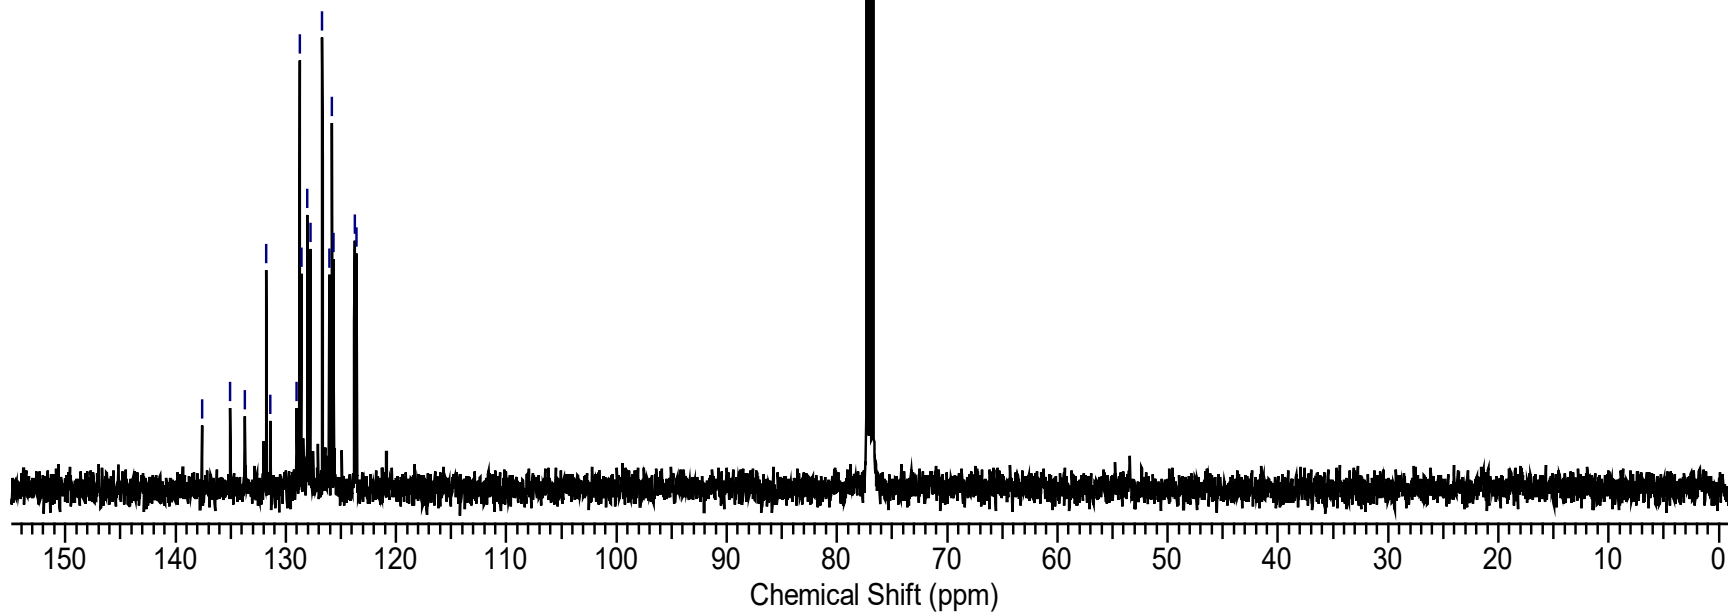

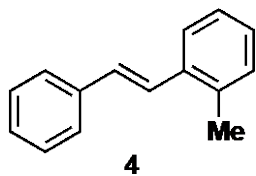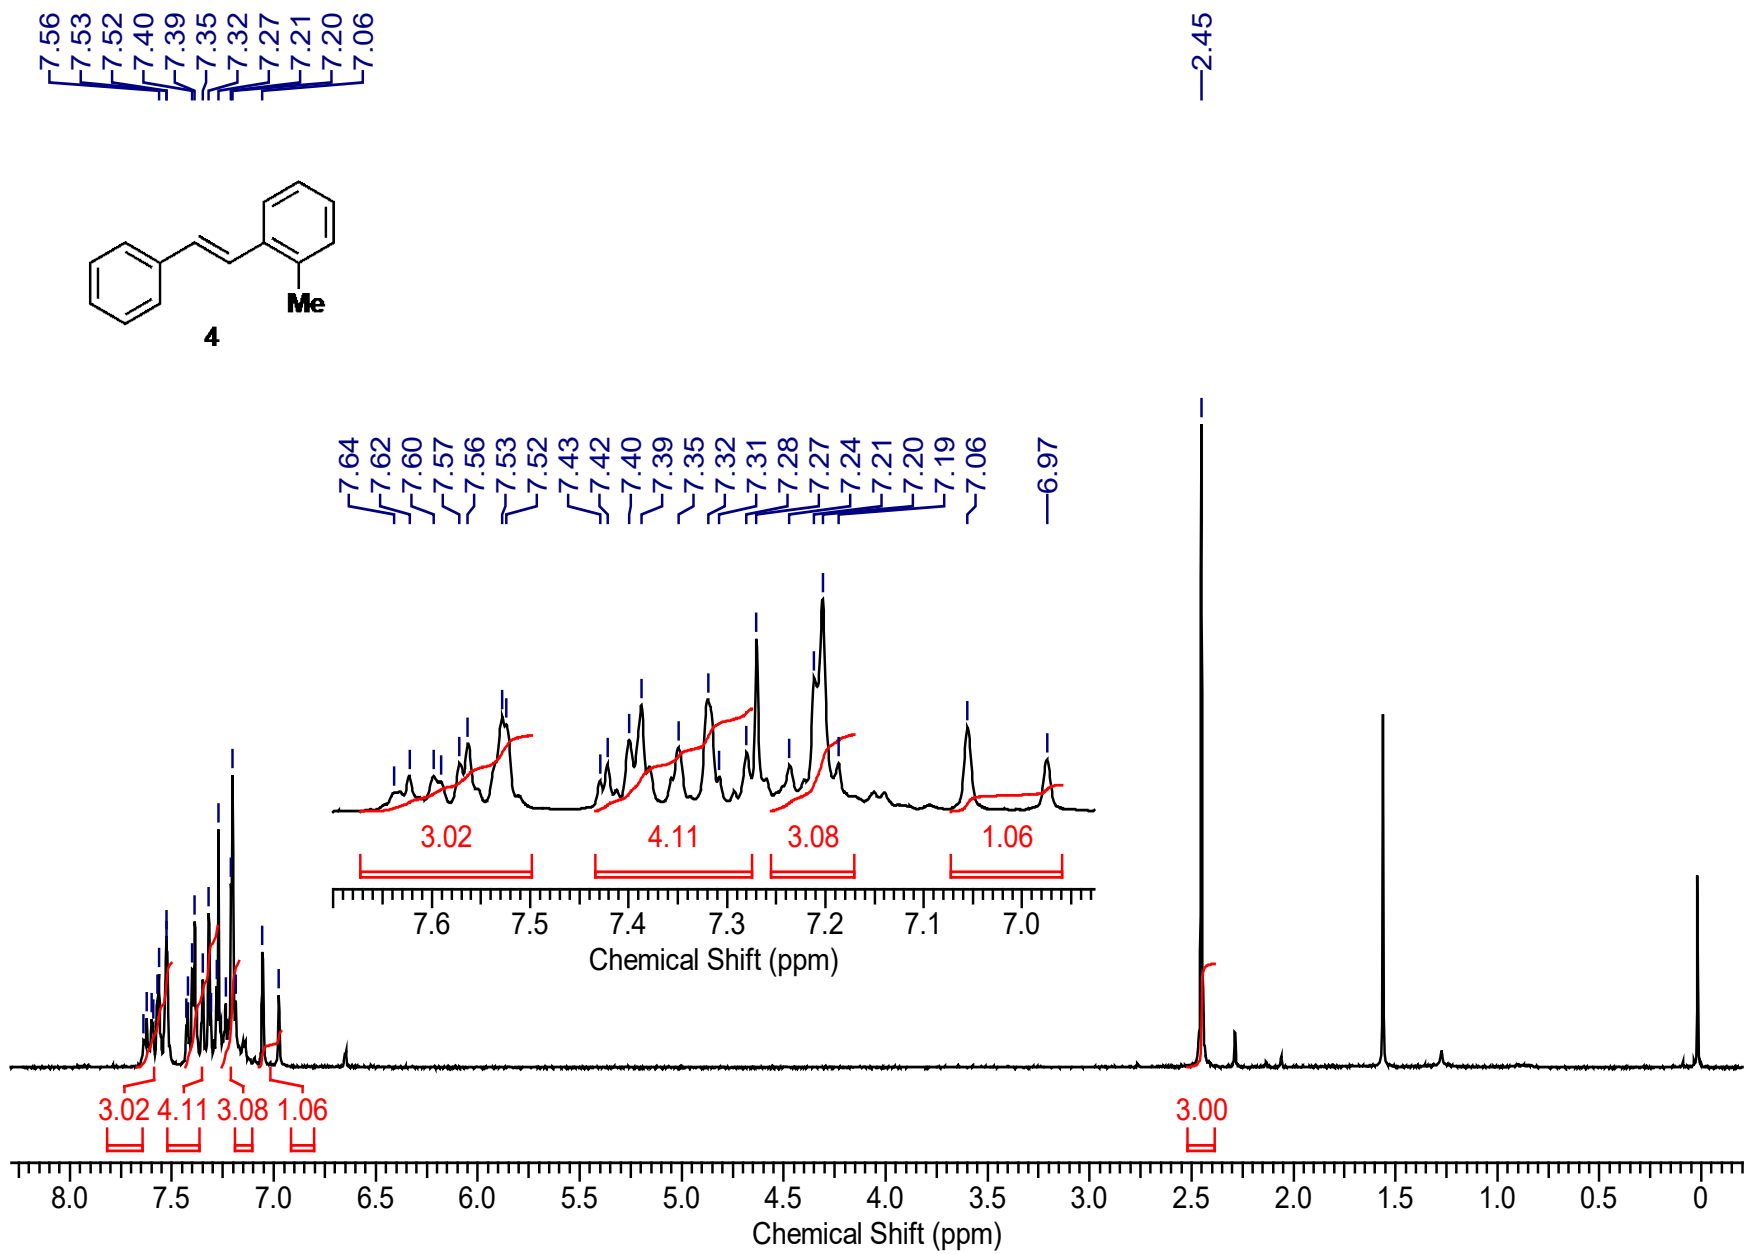

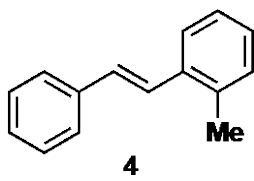

137.68  
135.80  
130.39  
130.01  
128.67  
127.57  
126.55  
126.19  
125.36

77.00

19.90

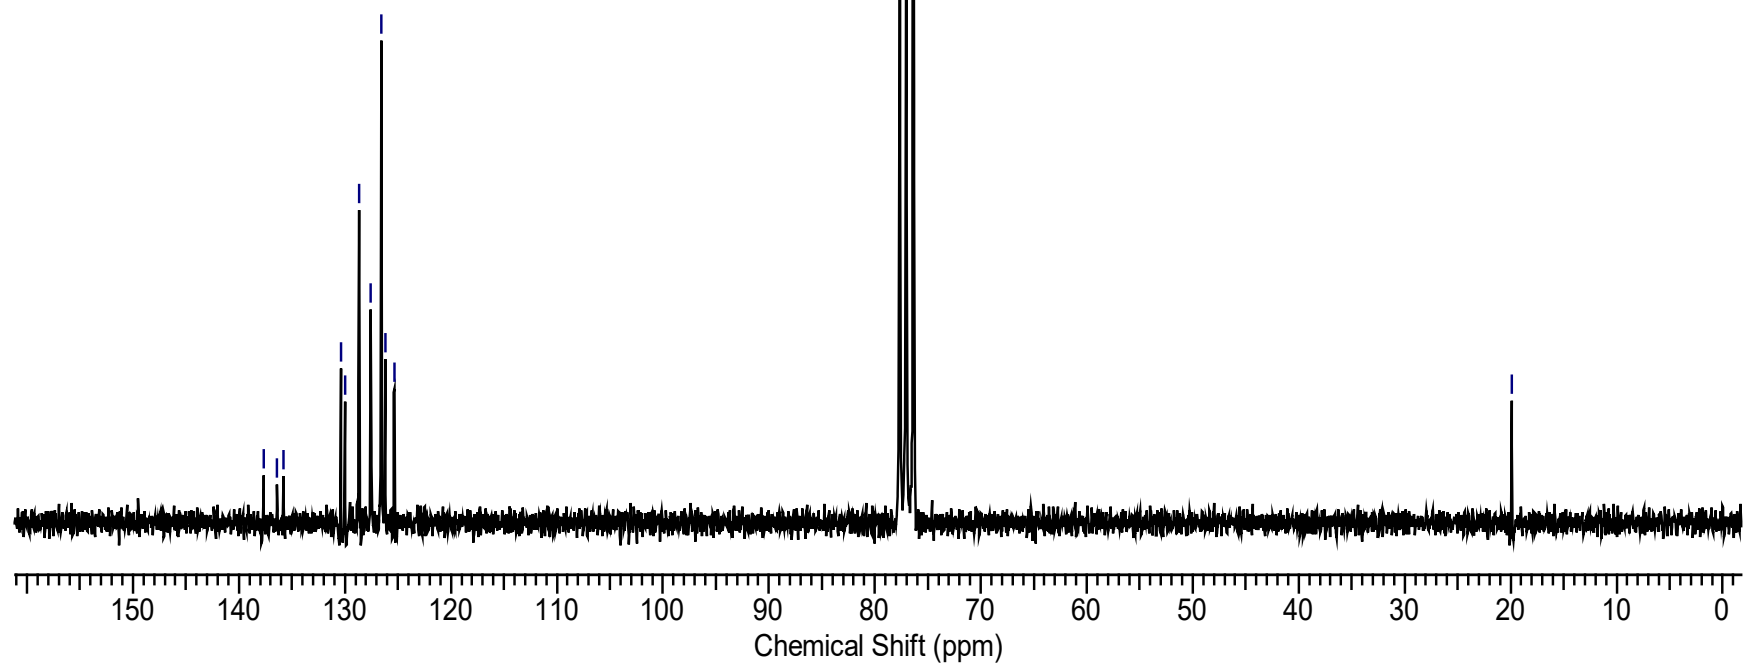



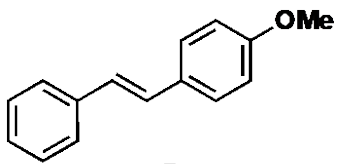

5

7.51  
7.48  
7.47  
7.43  
7.34  
7.31  
7.25  
7.04  
7.00  
6.92  
6.88

3.83

7.52  
7.51  
7.48  
7.47  
7.44  
7.43  
7.38  
7.38  
7.34  
7.34  
7.31  
7.26  
7.25  
7.23  
7.12  
7.10  
7.04  
7.00  
6.92  
6.91  
6.89  
6.88

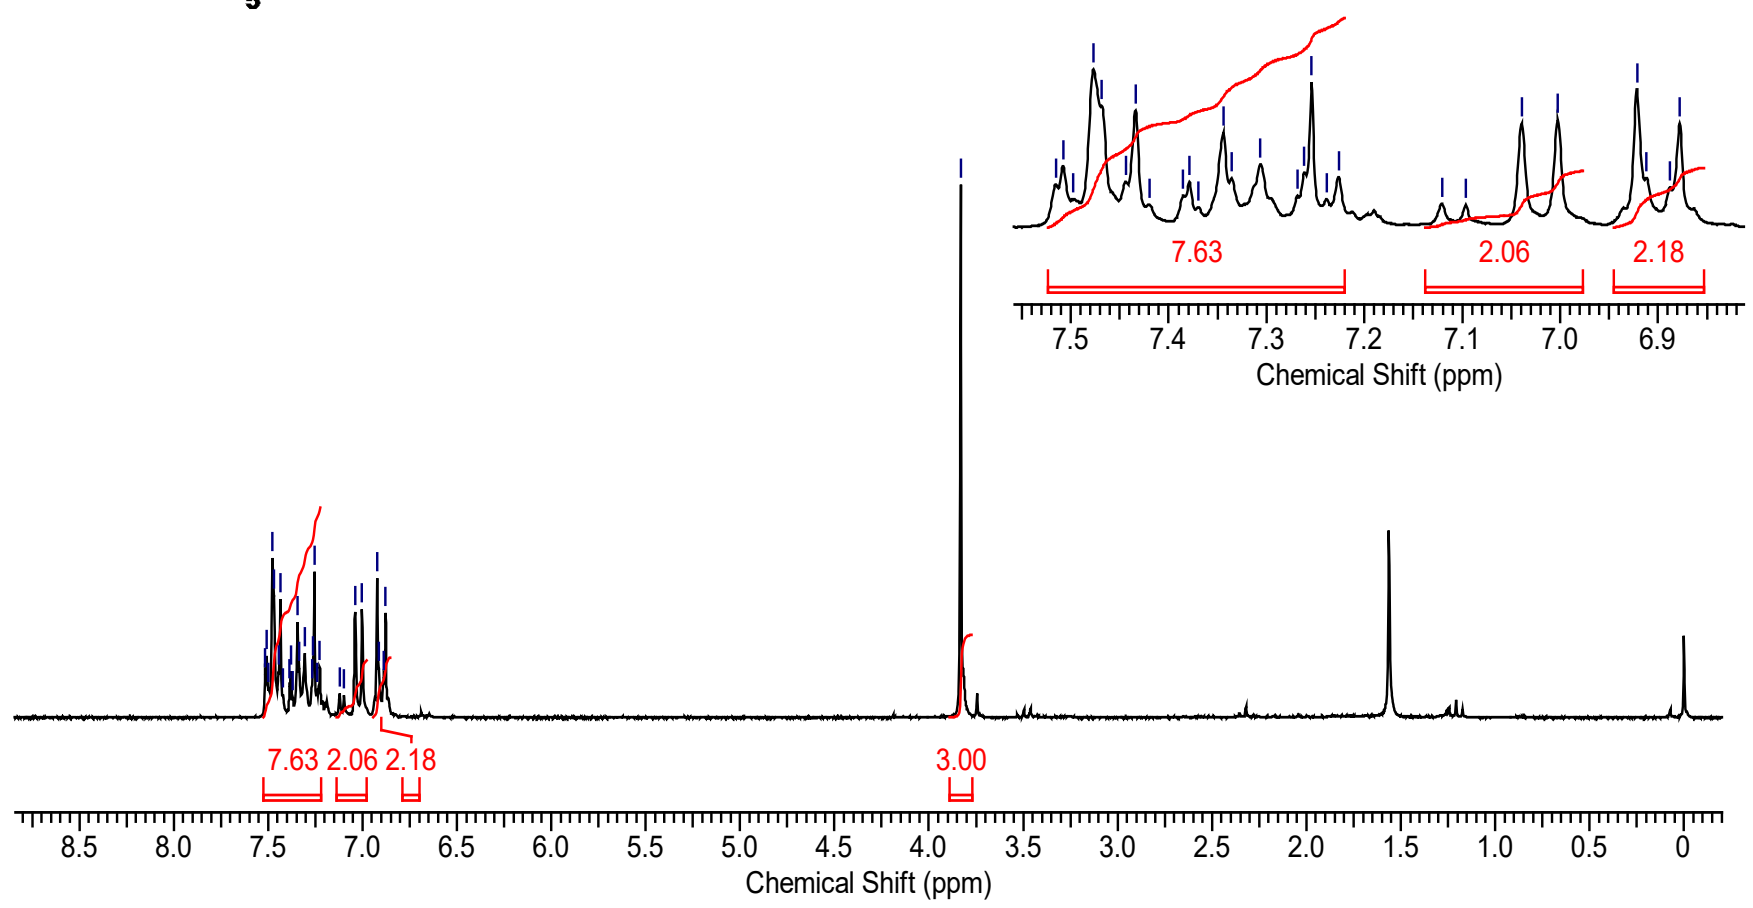

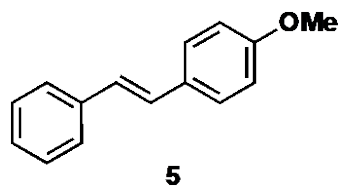

—159.31

—137.65

—130.15

—128.63

—128.21

—127.70

—127.20

—126.62

—126.24

—114.14

—77.64

—77.00

—76.37

—55.32

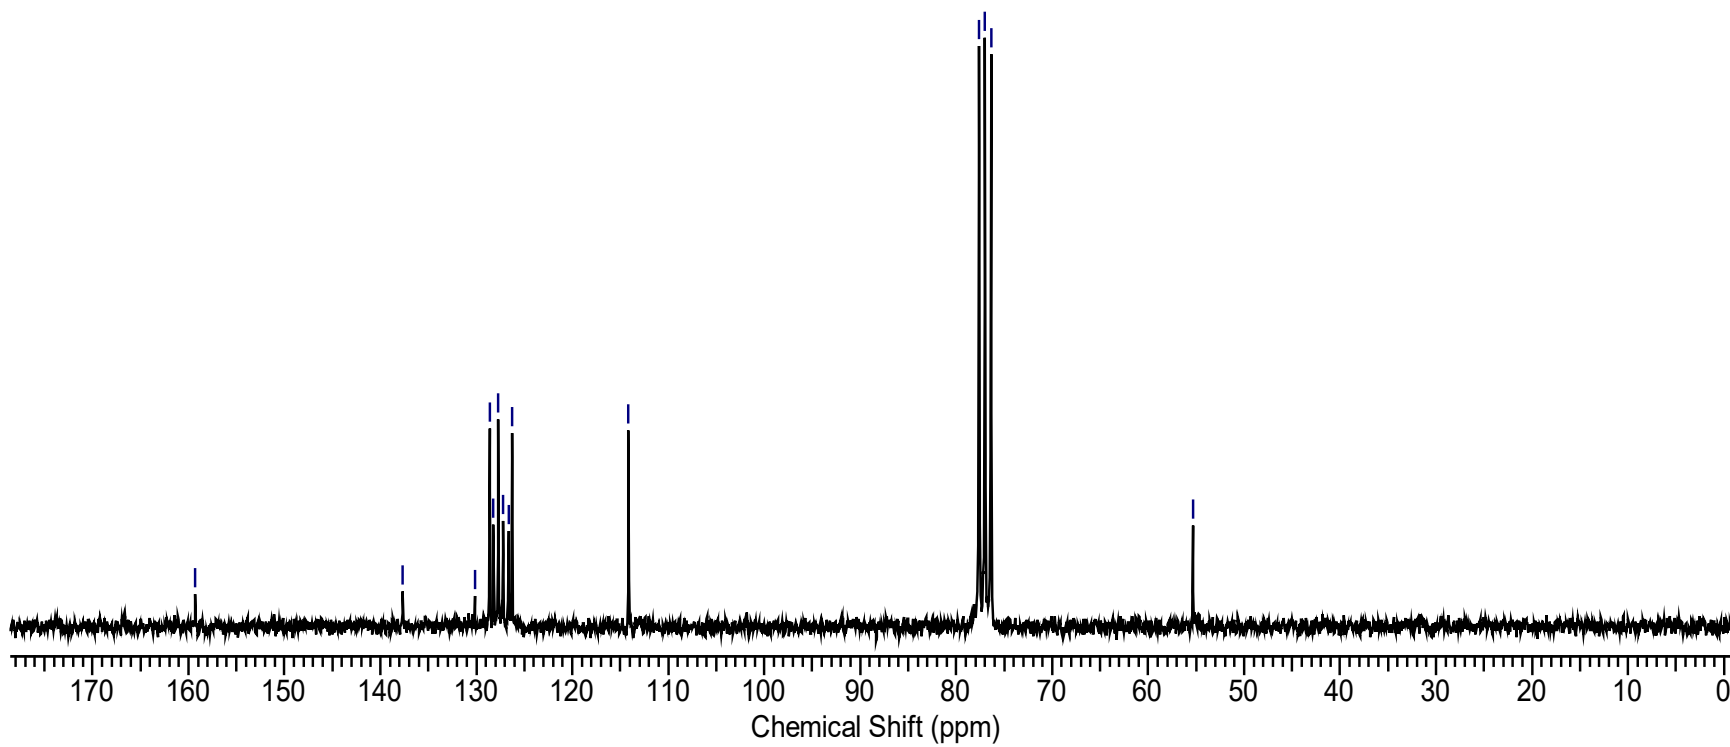

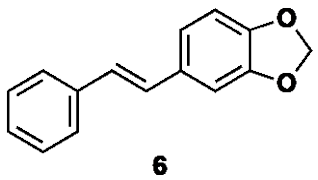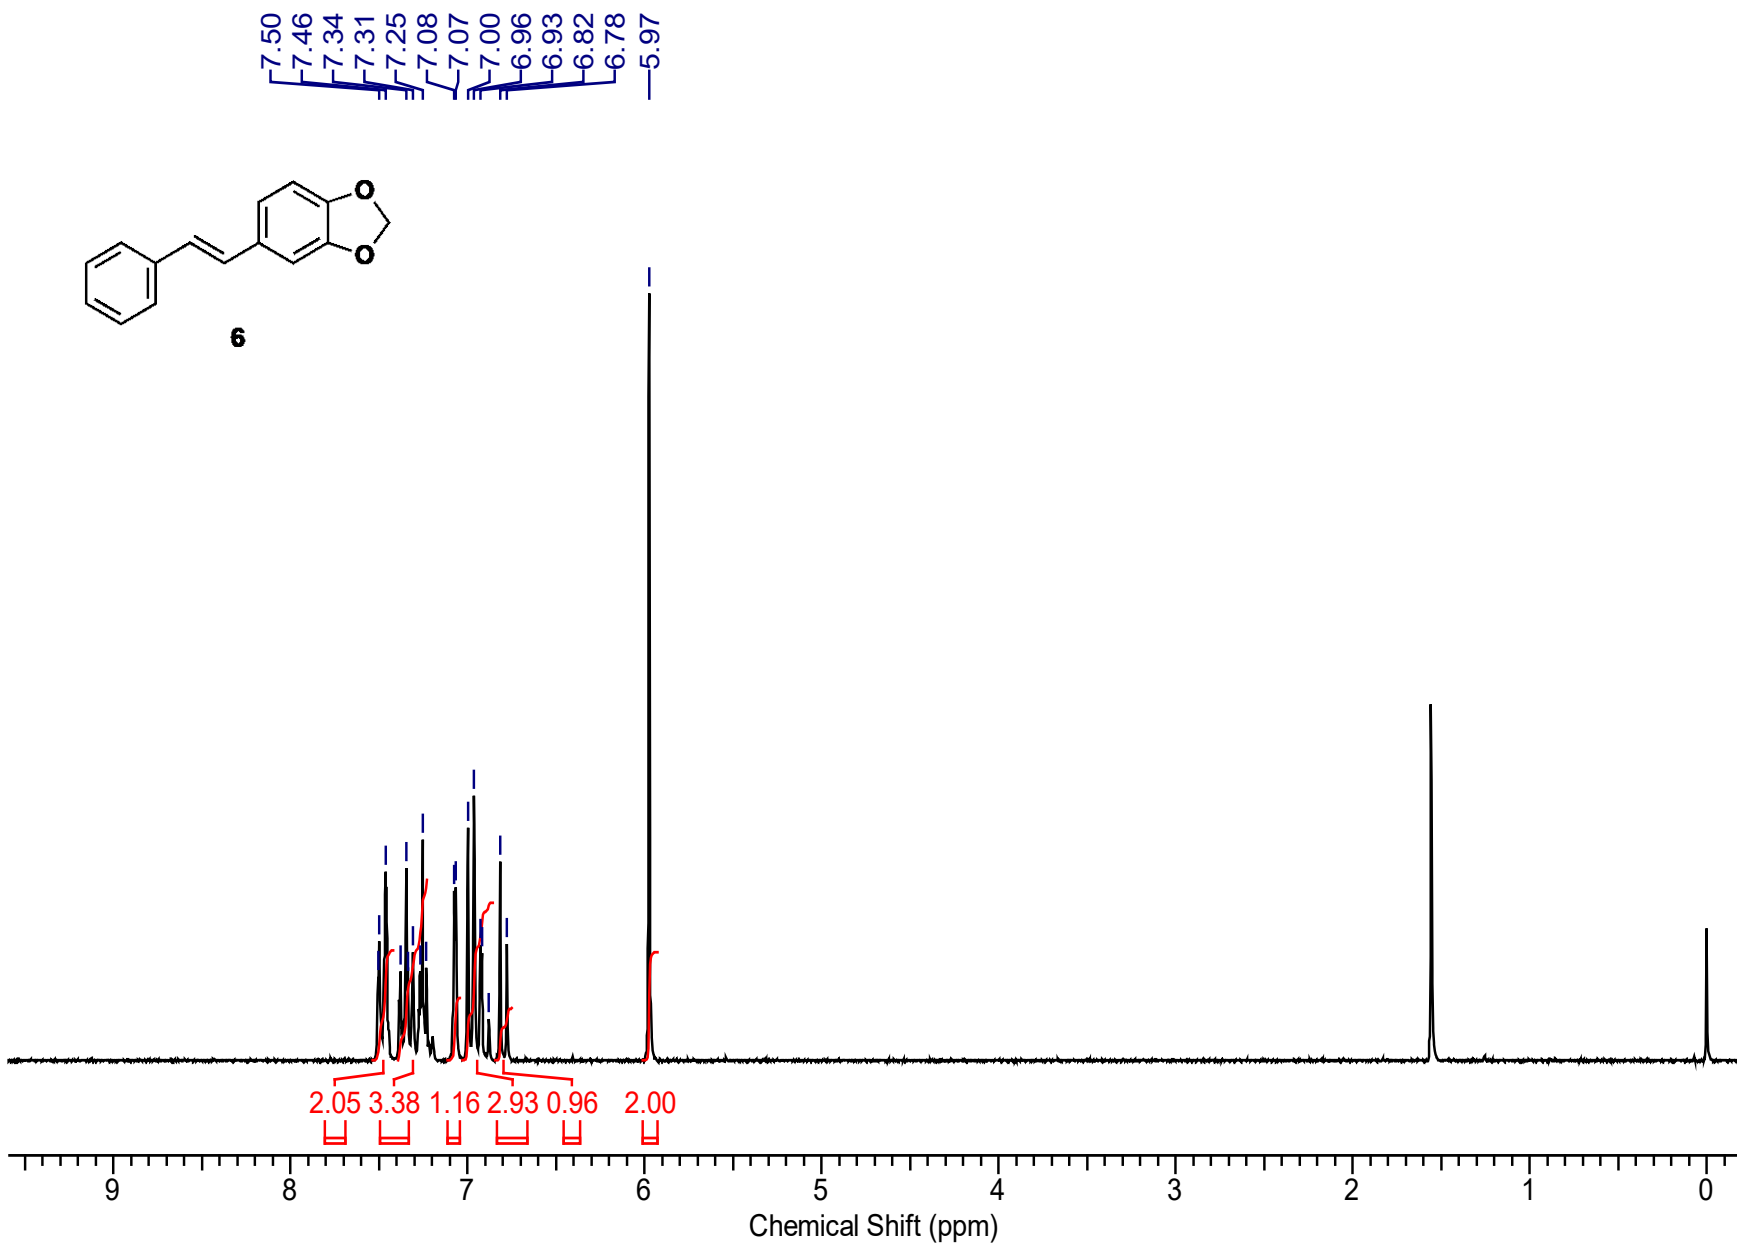

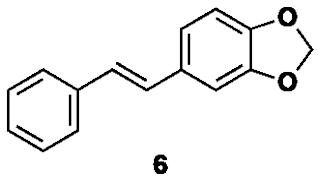

- 148.14
- 147.31
- 137.40
- 131.88
- 128.65
- 128.34
- 127.35
- 127.02
- 126.29
- 121.45
- 108.41
- 105.55
- 101.11

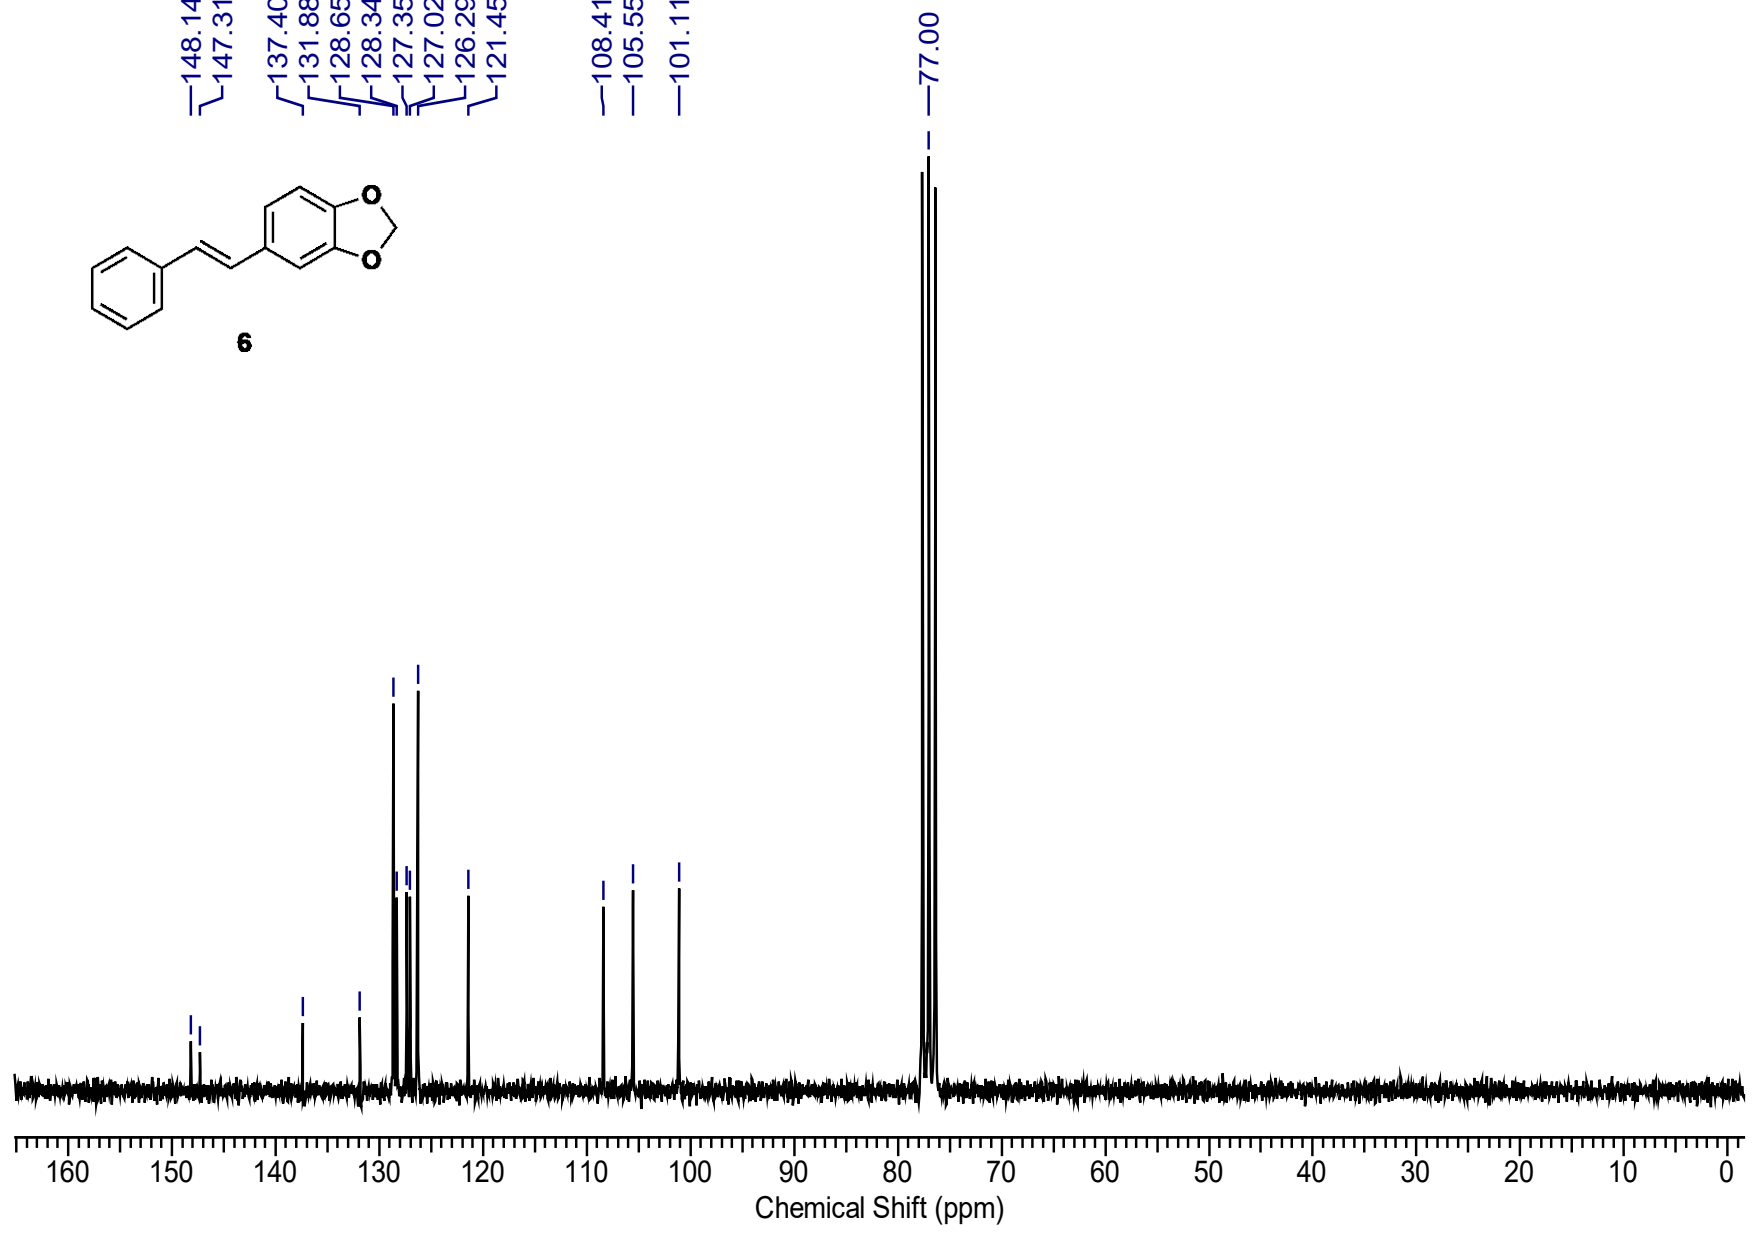

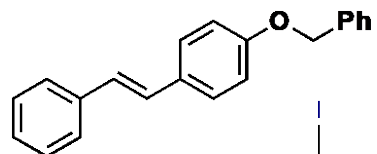

7

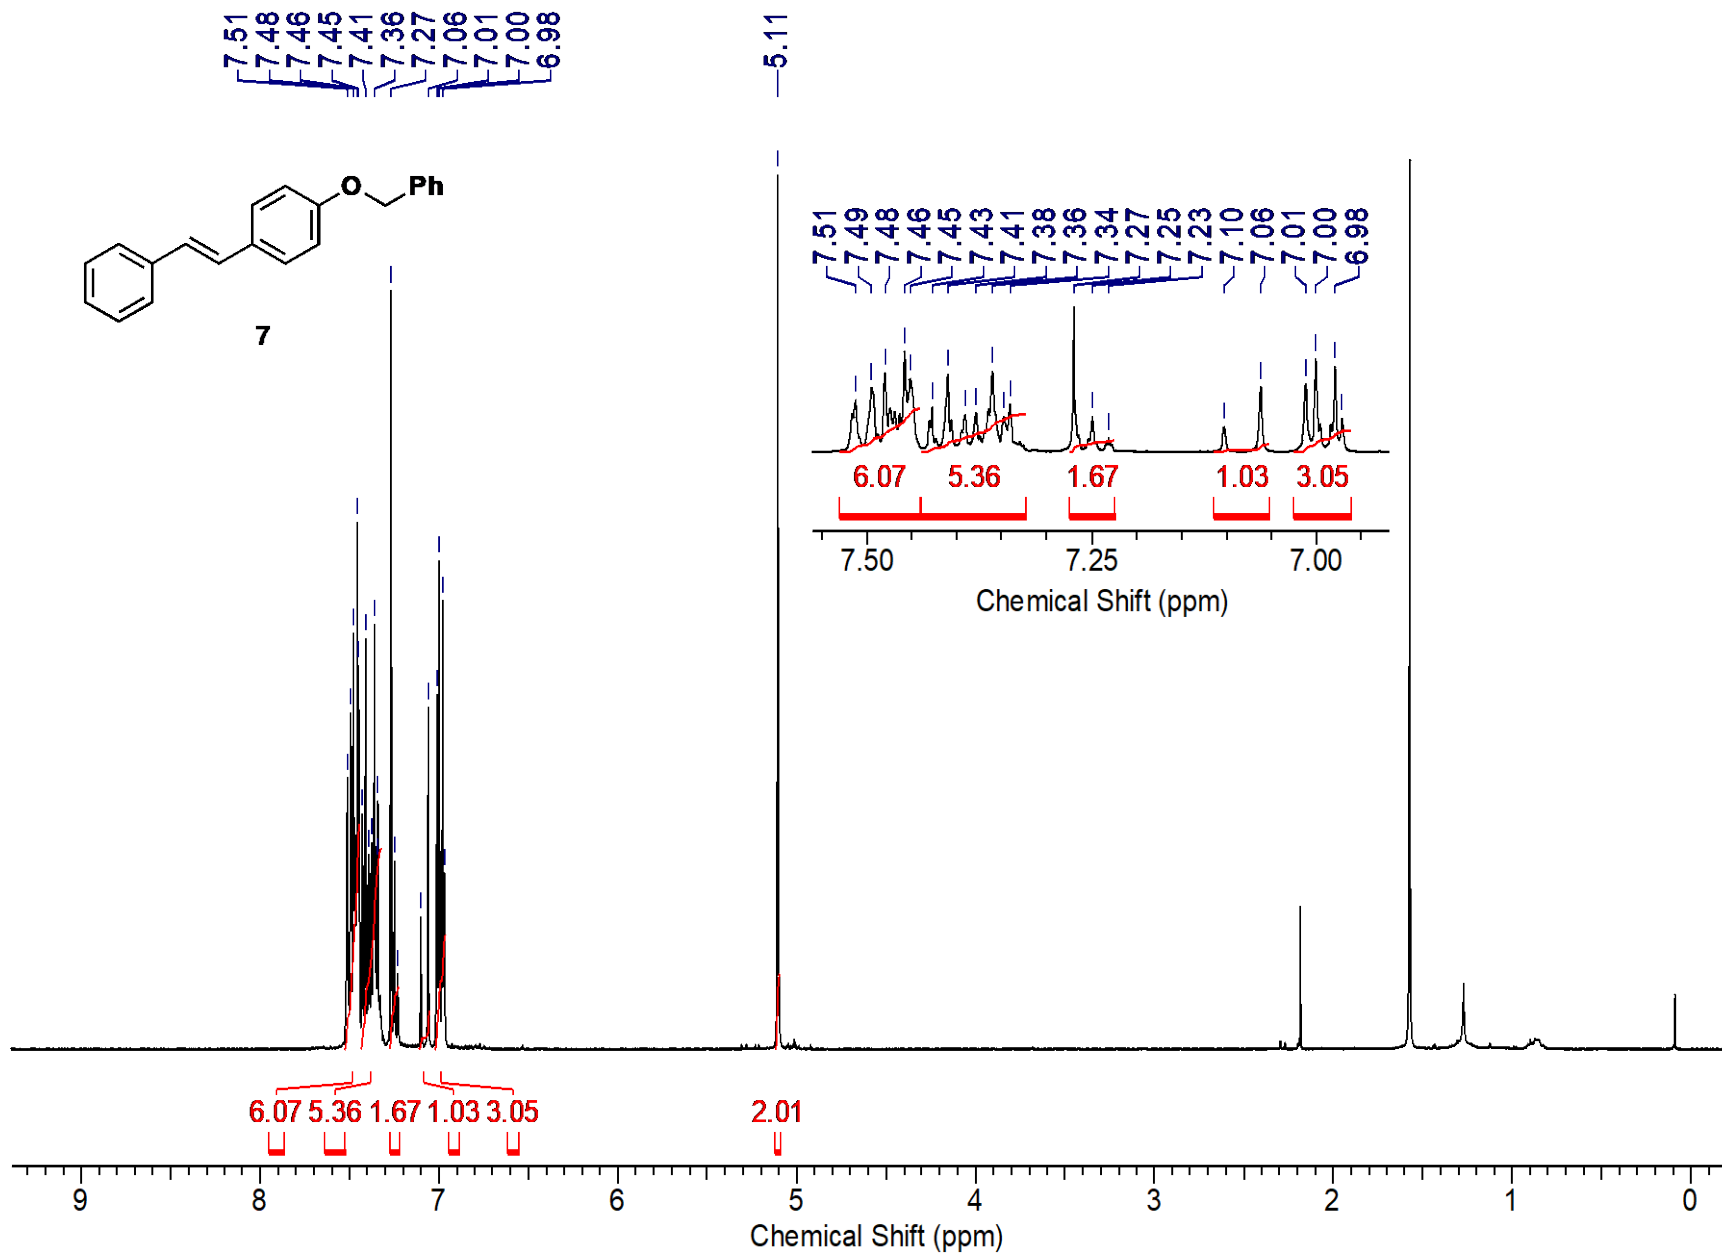

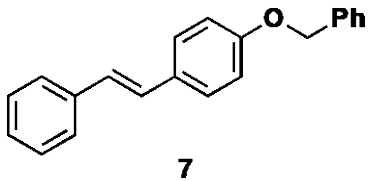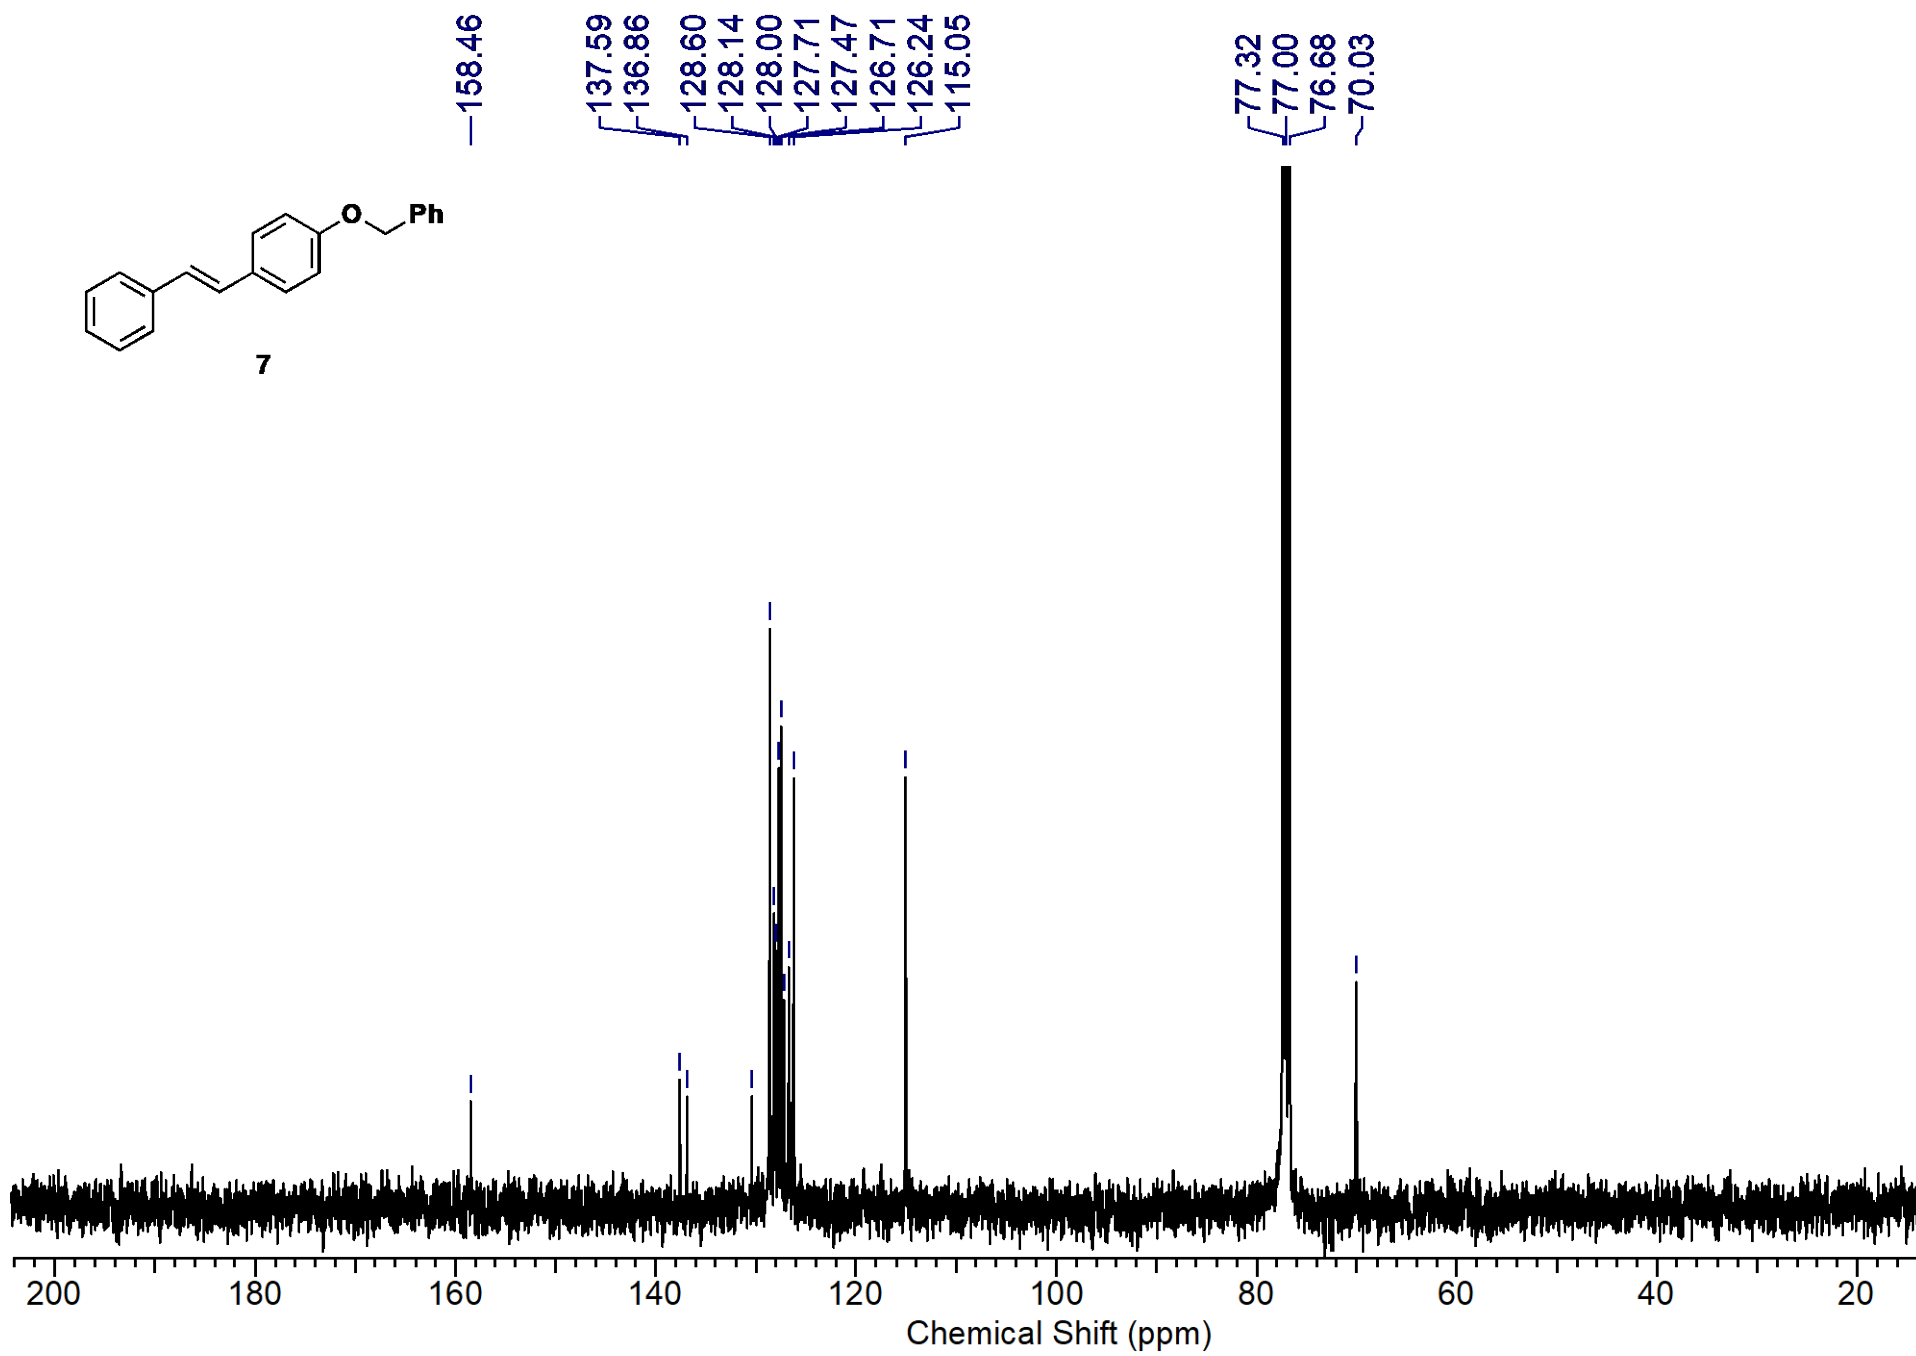

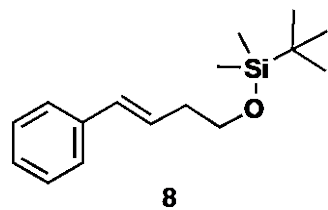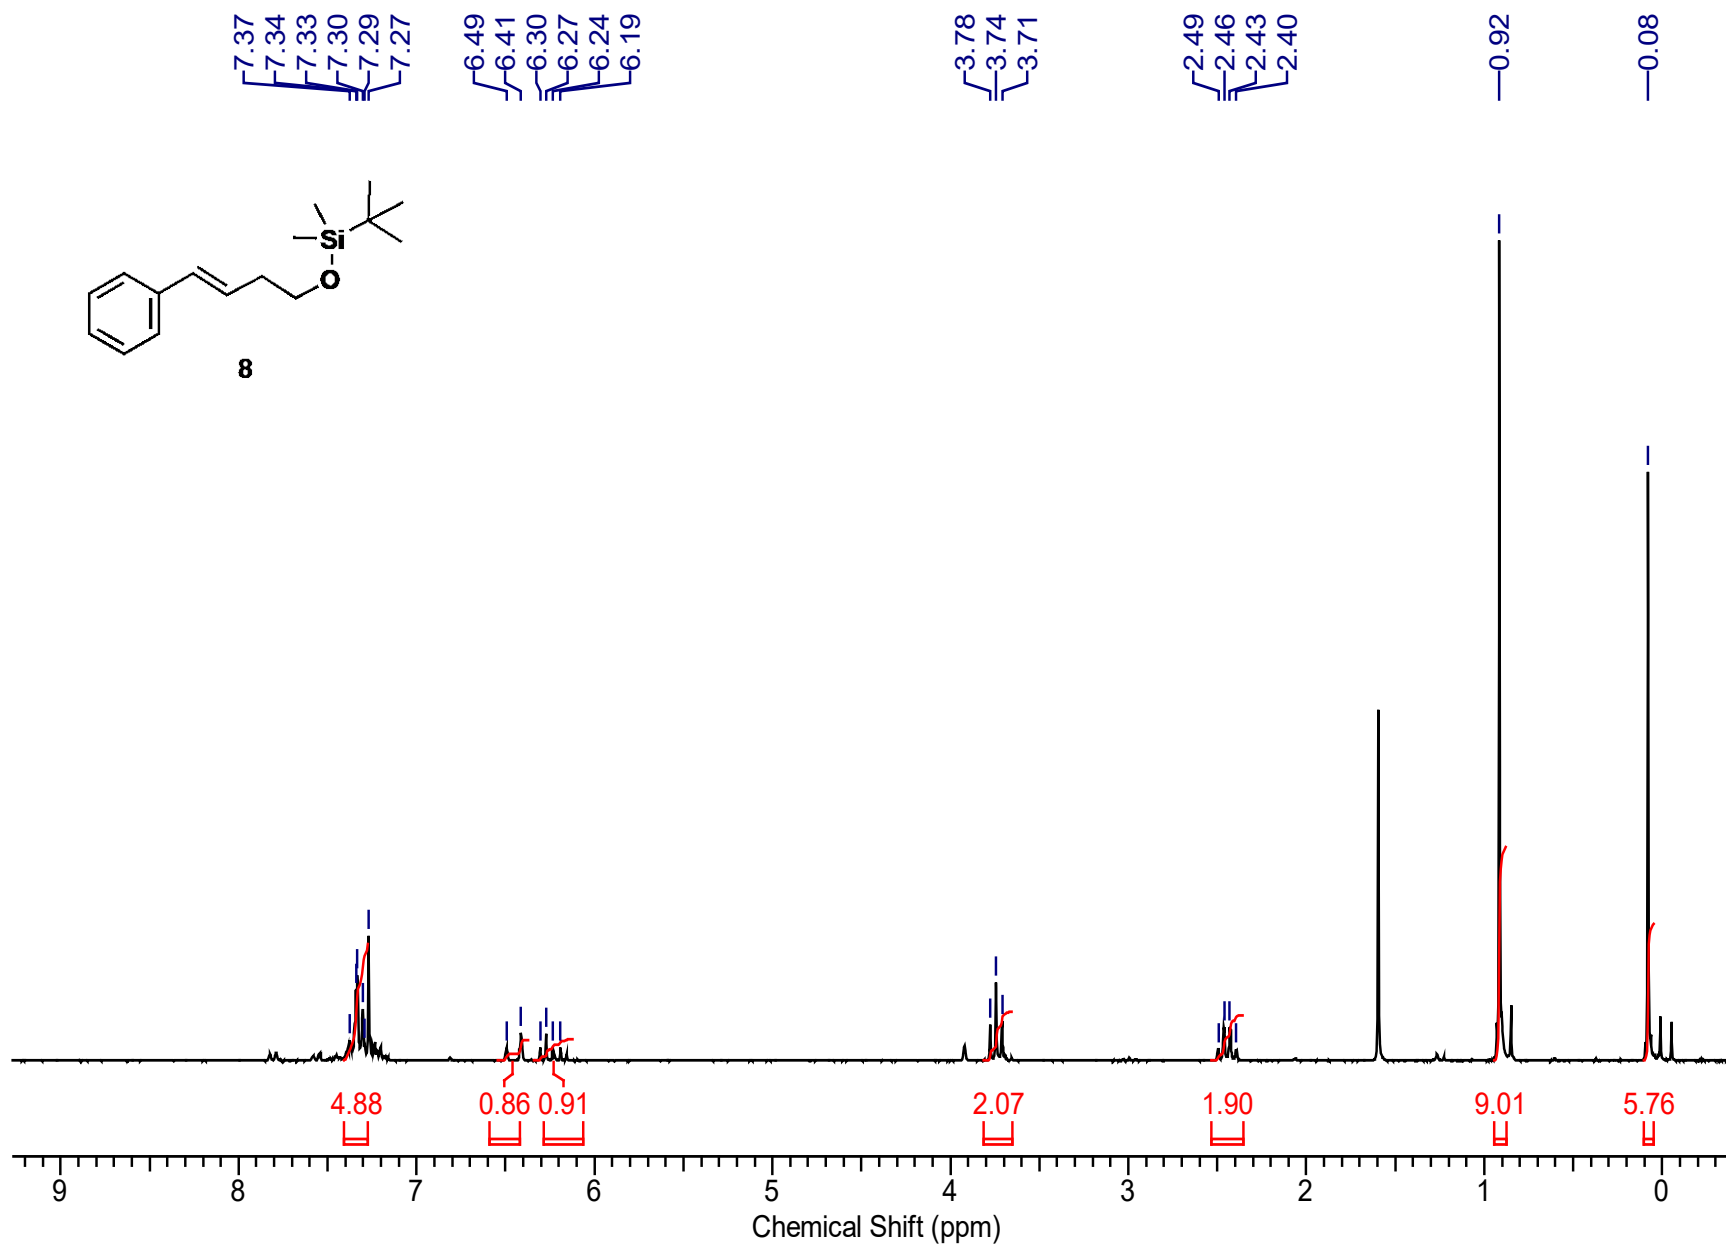

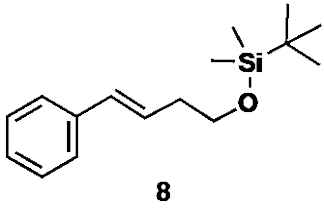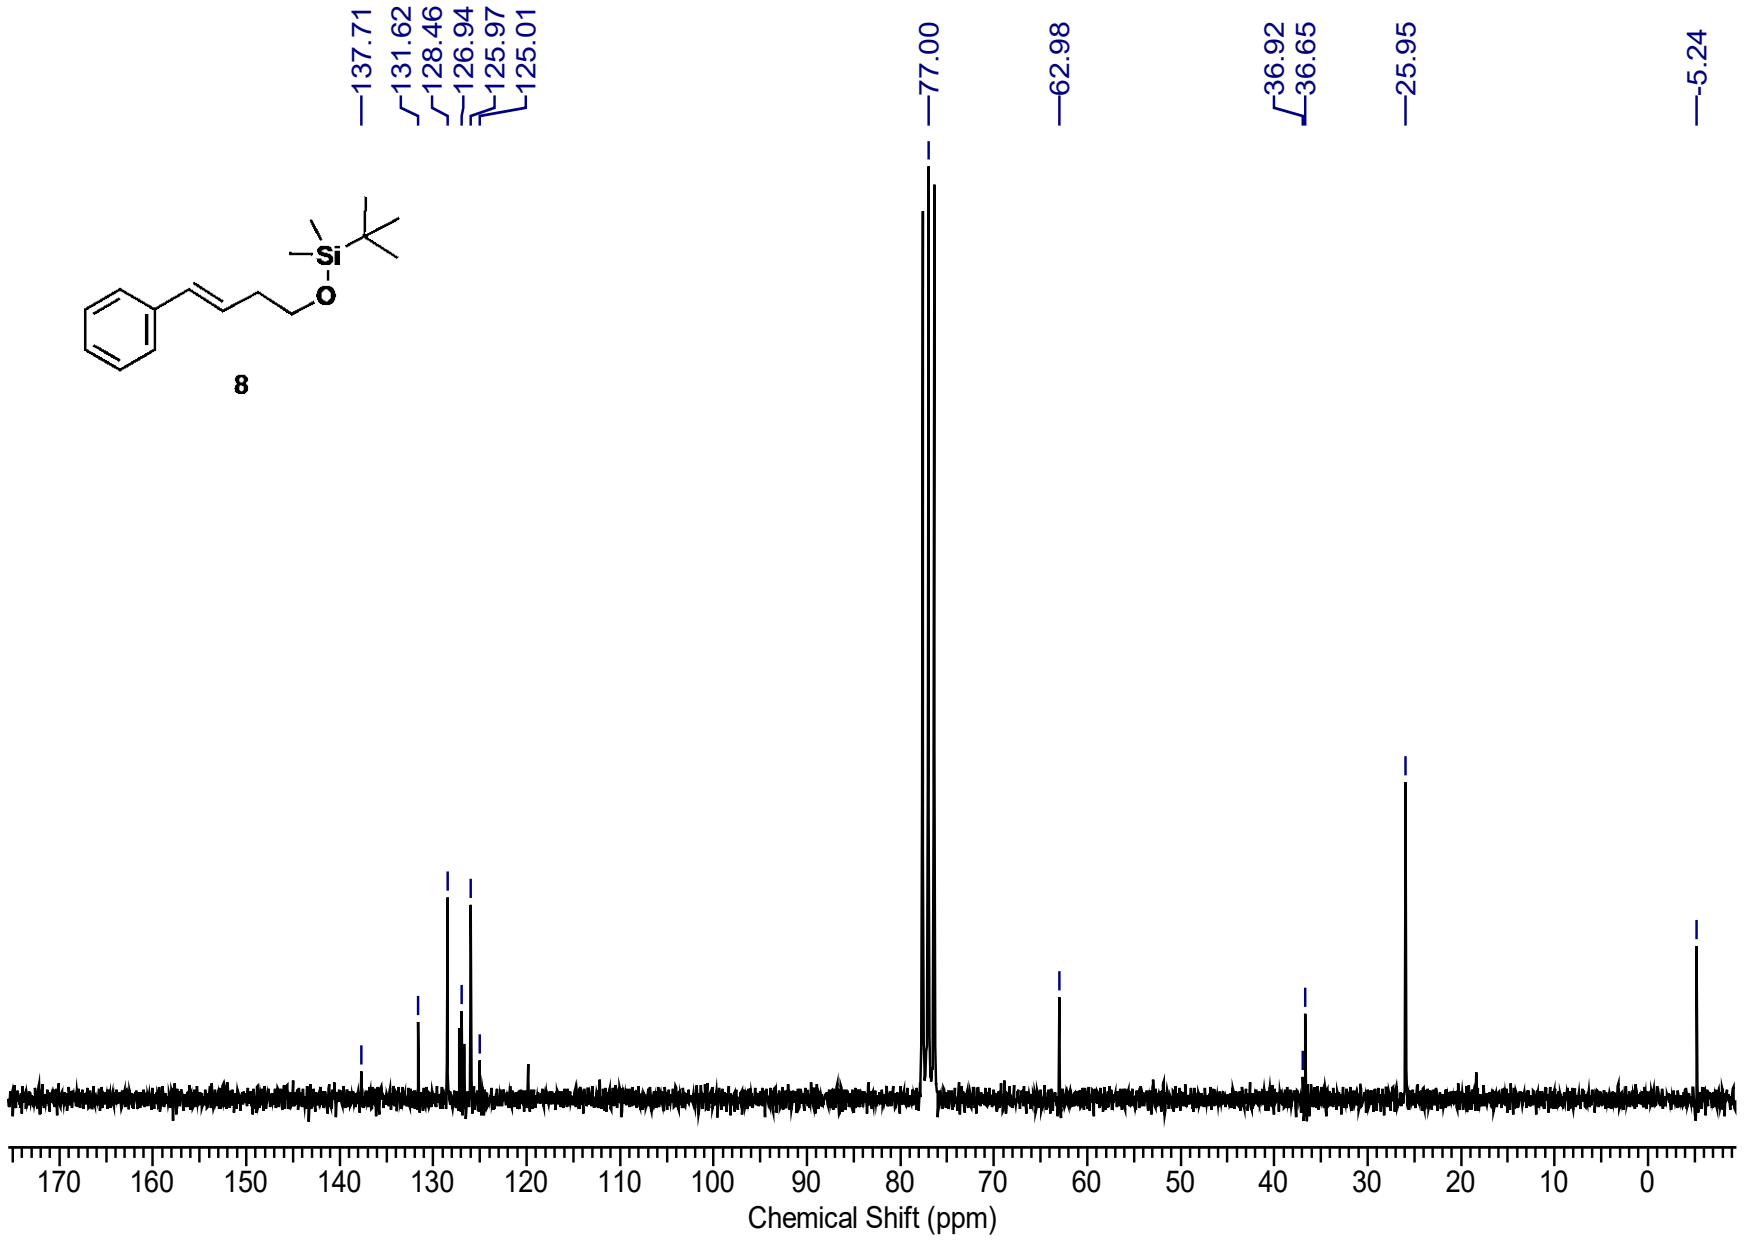



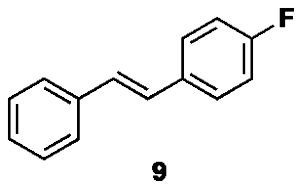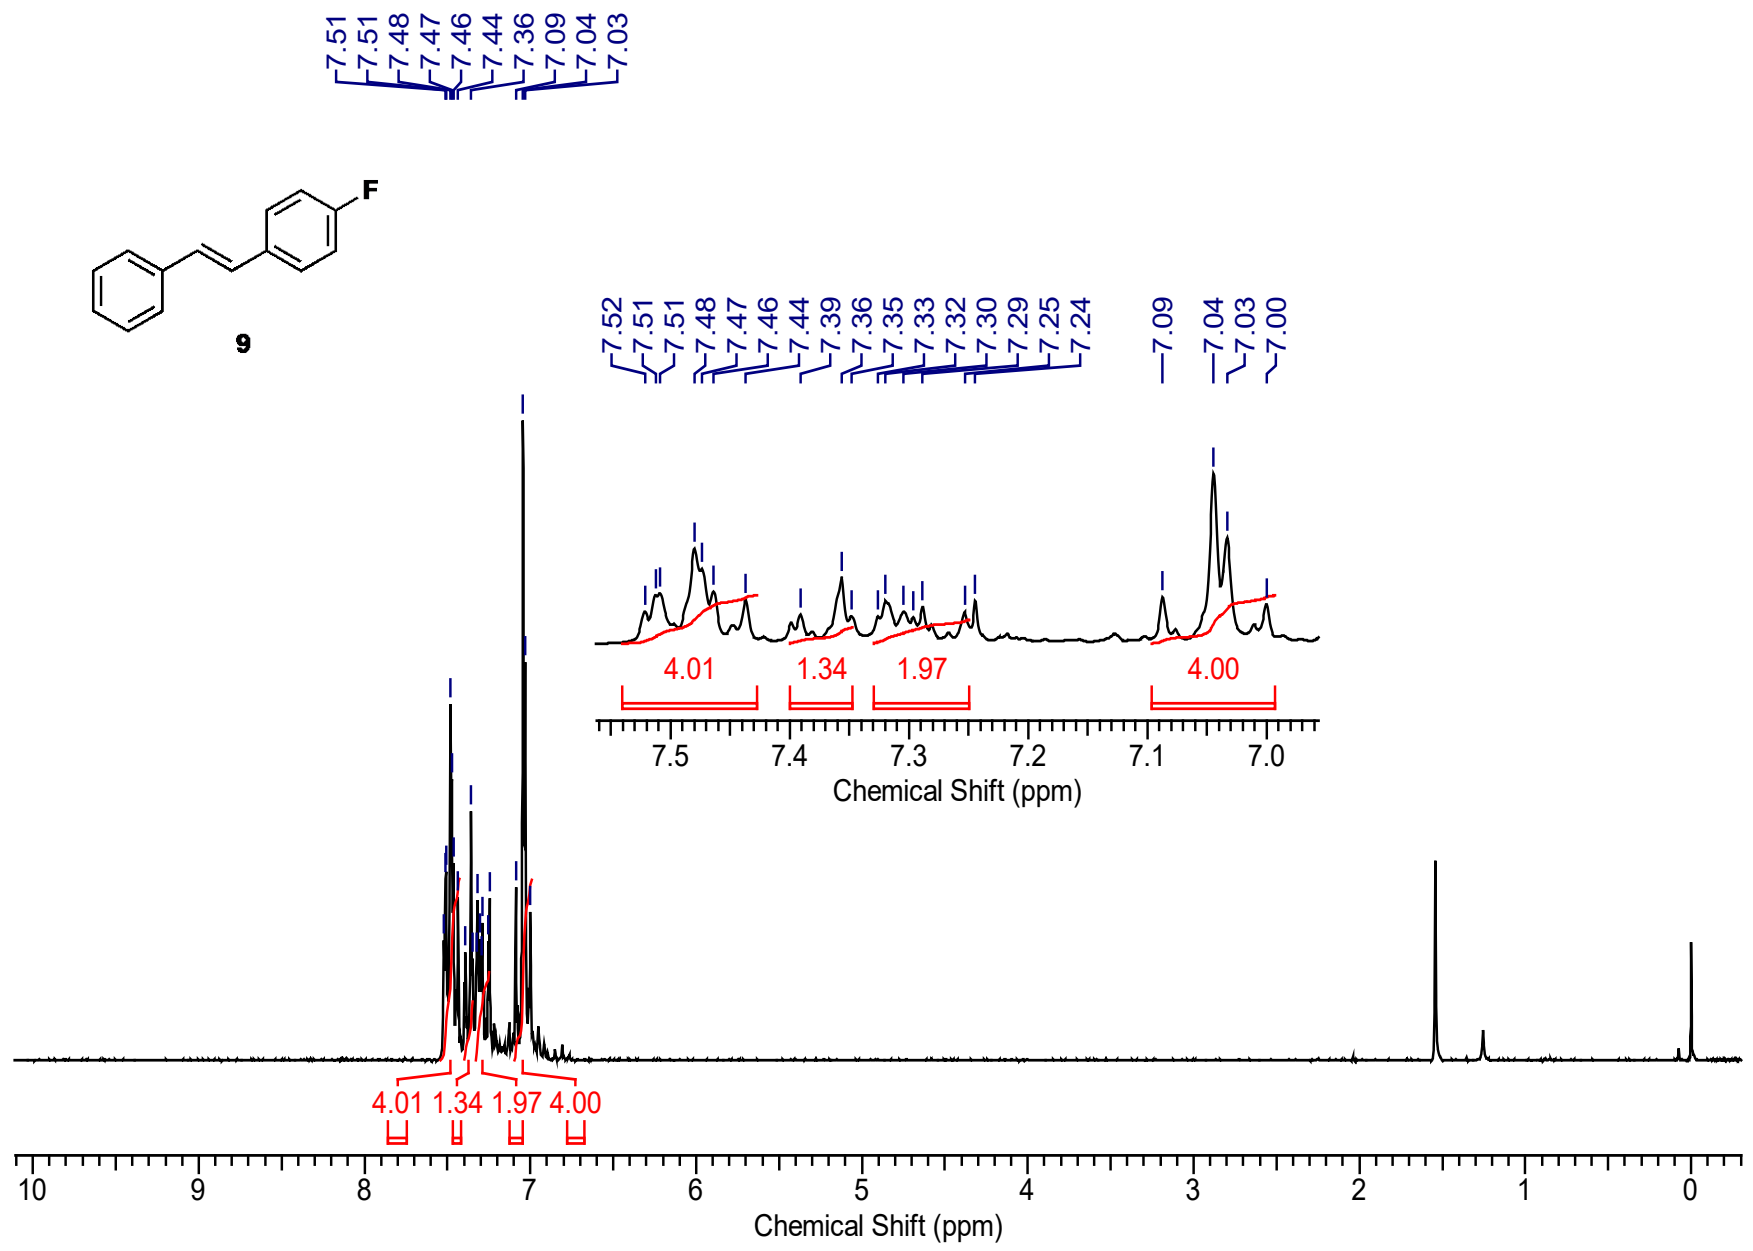

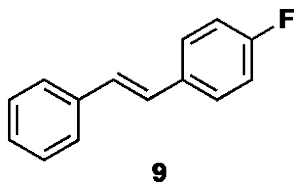

—164.78  
—159.87

137.16  
133.48  
128.69  
128.05  
127.89  
127.65  
127.47  
126.42  
115.81  
115.39

—77.00

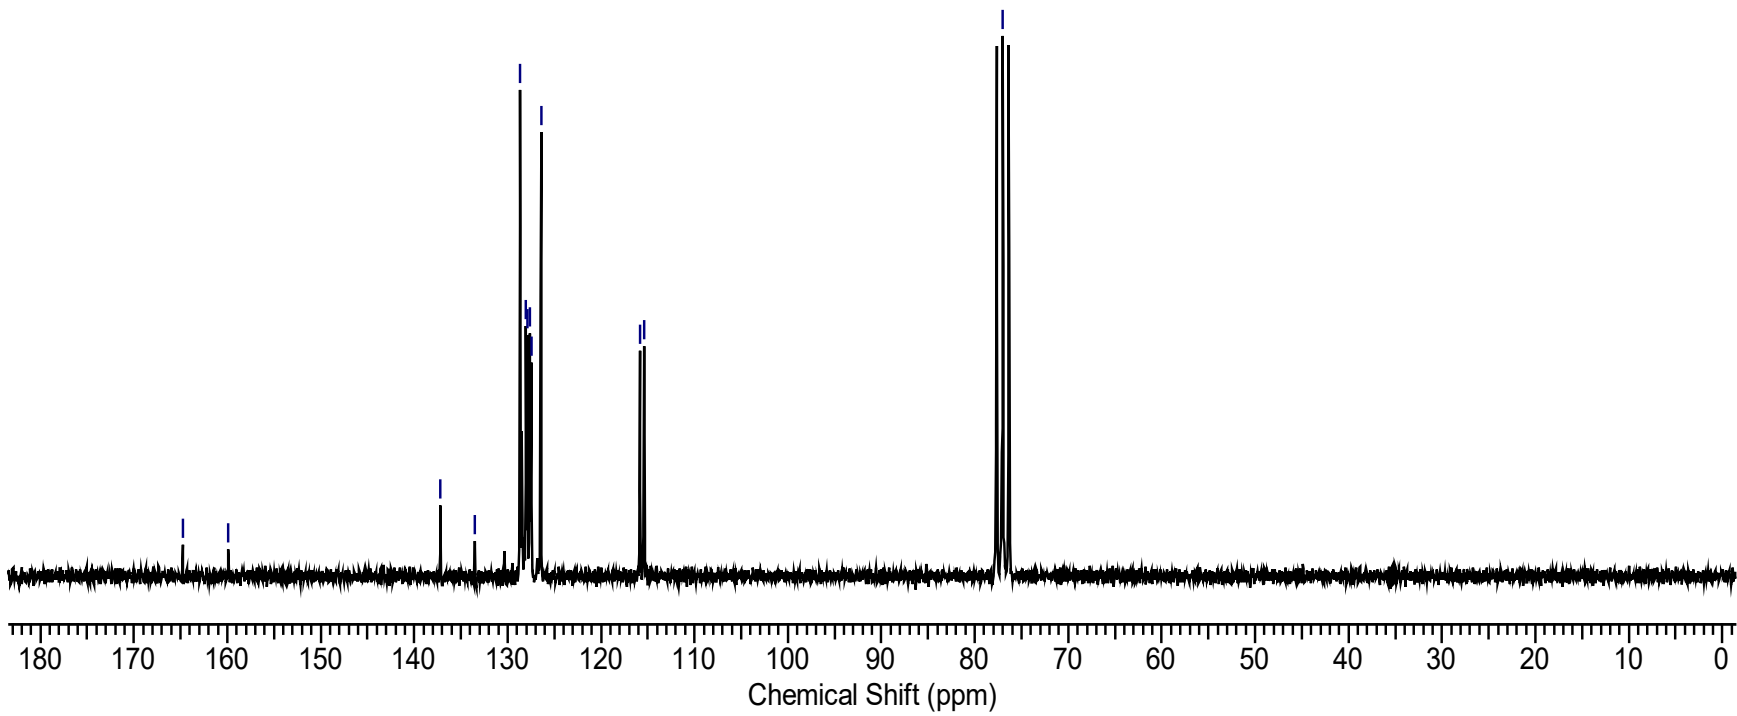

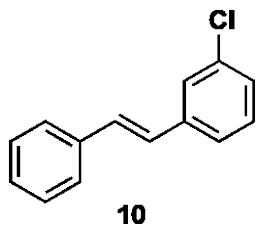

7.50  
7.49  
7.37  
7.32  
7.28  
7.25  
7.25  
7.24  
7.08  
7.05

7.53  
7.53  
7.51  
7.50  
7.49  
7.40  
7.37  
7.36  
7.35  
7.34  
7.33  
7.32  
7.31  
7.28  
7.25  
7.25  
7.24  
7.21  
7.20  
7.16  
7.08  
7.05  
6.97

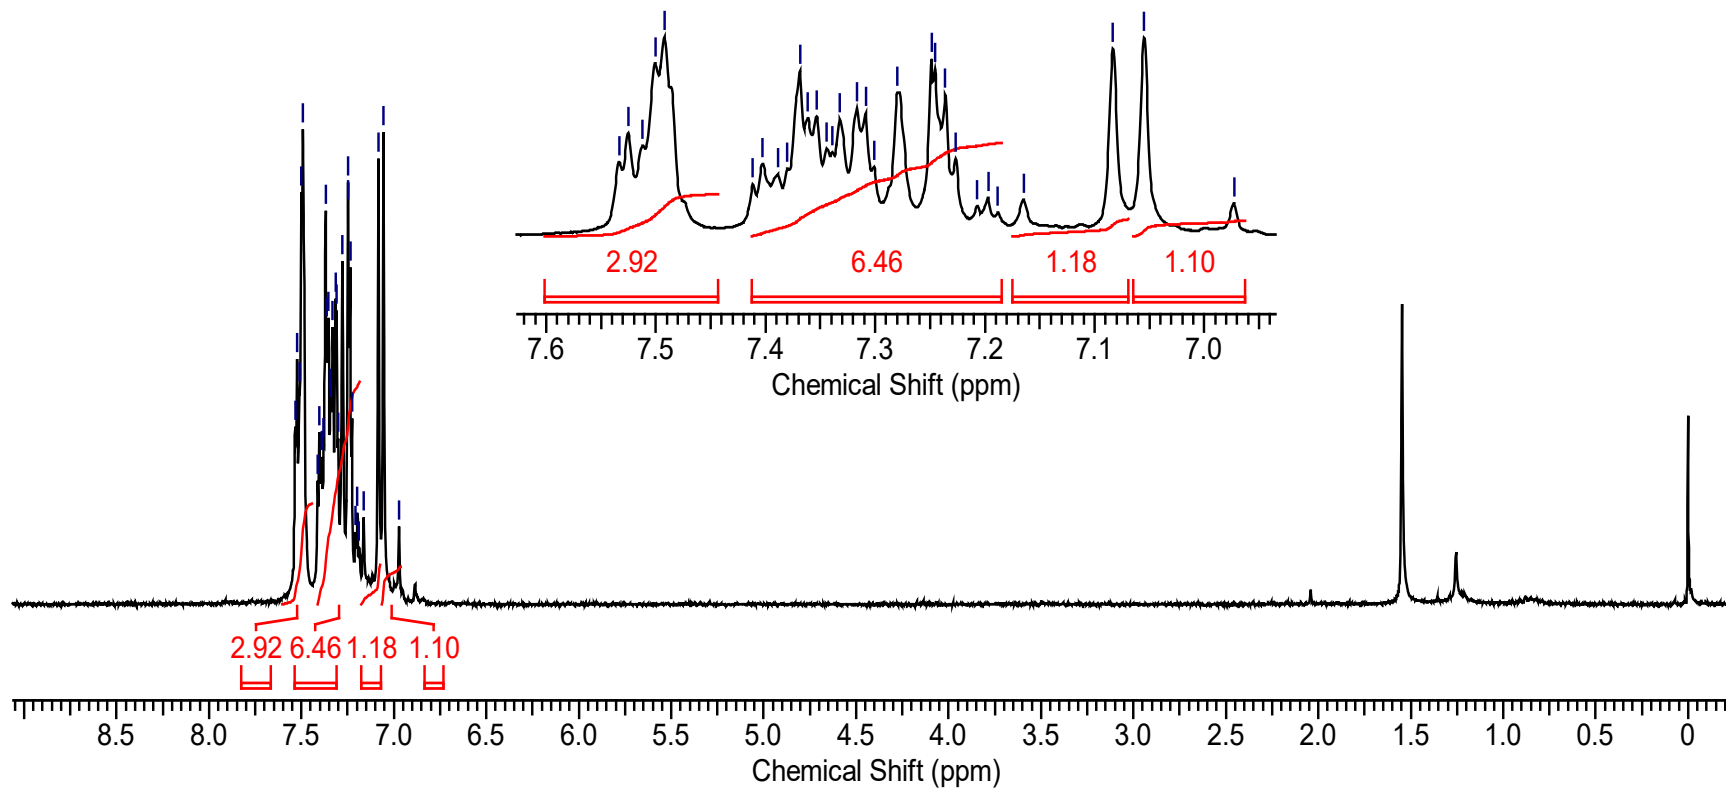

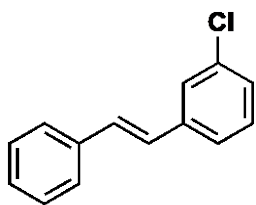

10

139.23  
136.80  
130.12  
128.74  
128.02  
127.47  
127.20  
126.64  
126.29  
124.73

77.63  
77.00  
76.37

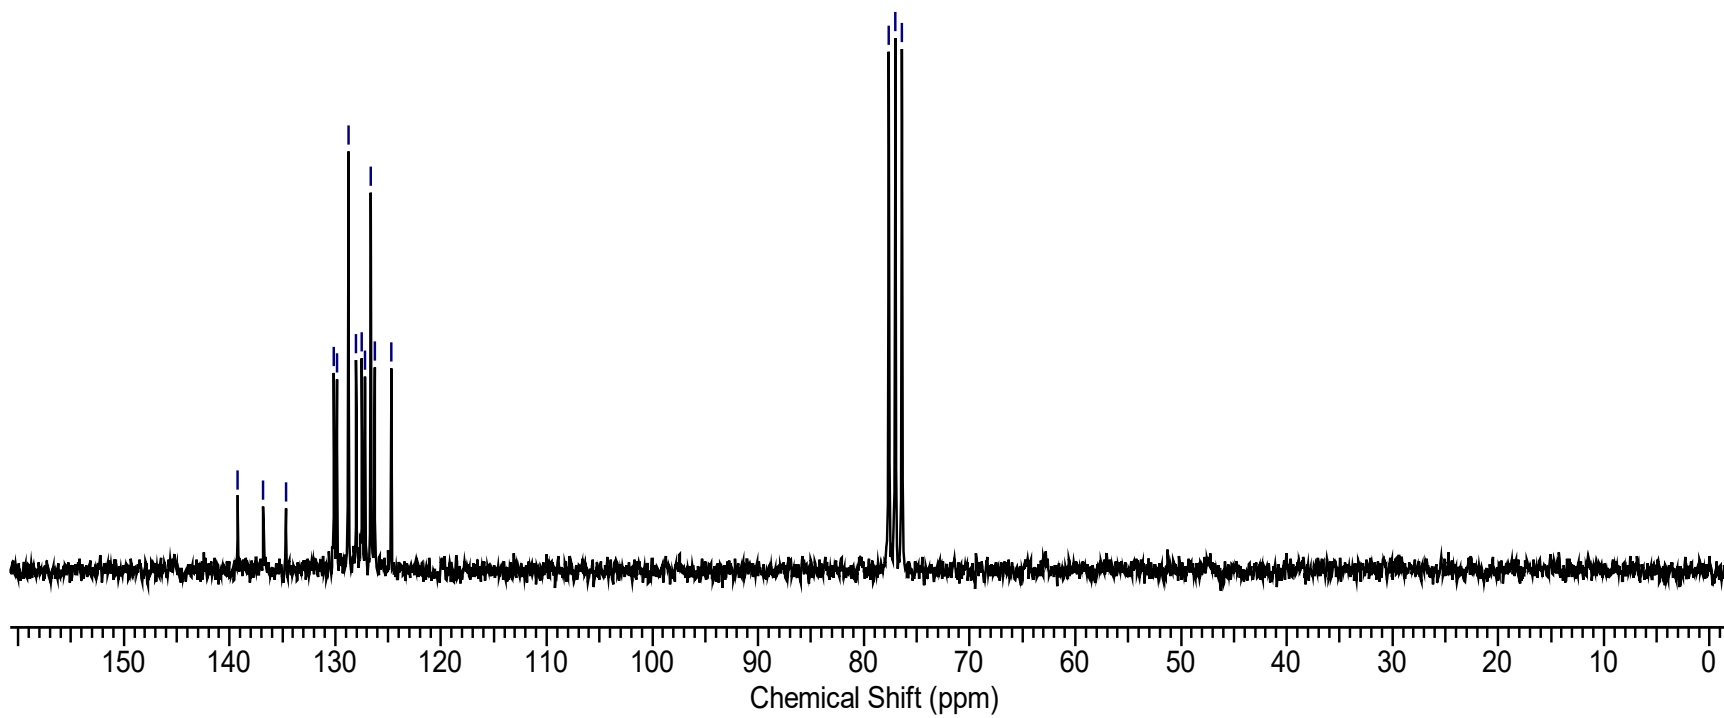

S68

7.52  
7.49  
7.46  
7.39  
7.36  
7.35  
7.31  
7.30  
7.26  
7.07  
7.06

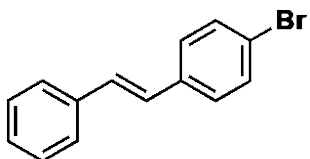

7.52  
7.50  
7.49  
7.48  
7.47  
7.46  
7.41  
7.39  
7.38  
7.36  
7.35  
7.33  
7.31  
7.30  
7.27  
7.26  
7.10  
7.07  
7.06

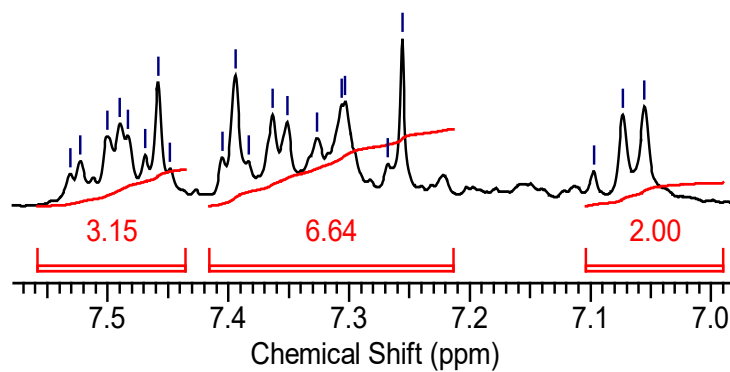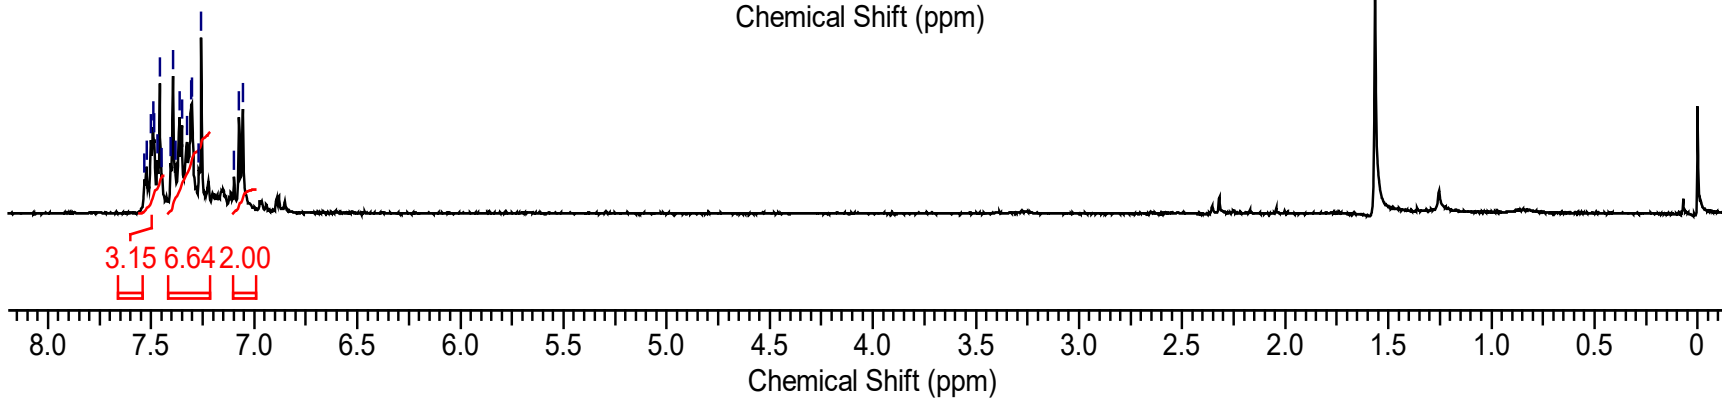

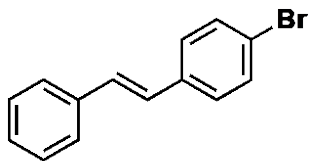

11

136.28  
131.77  
129.43  
128.73  
127.96  
127.89  
127.63  
127.40  
126.55

77.63  
77.00  
76.37

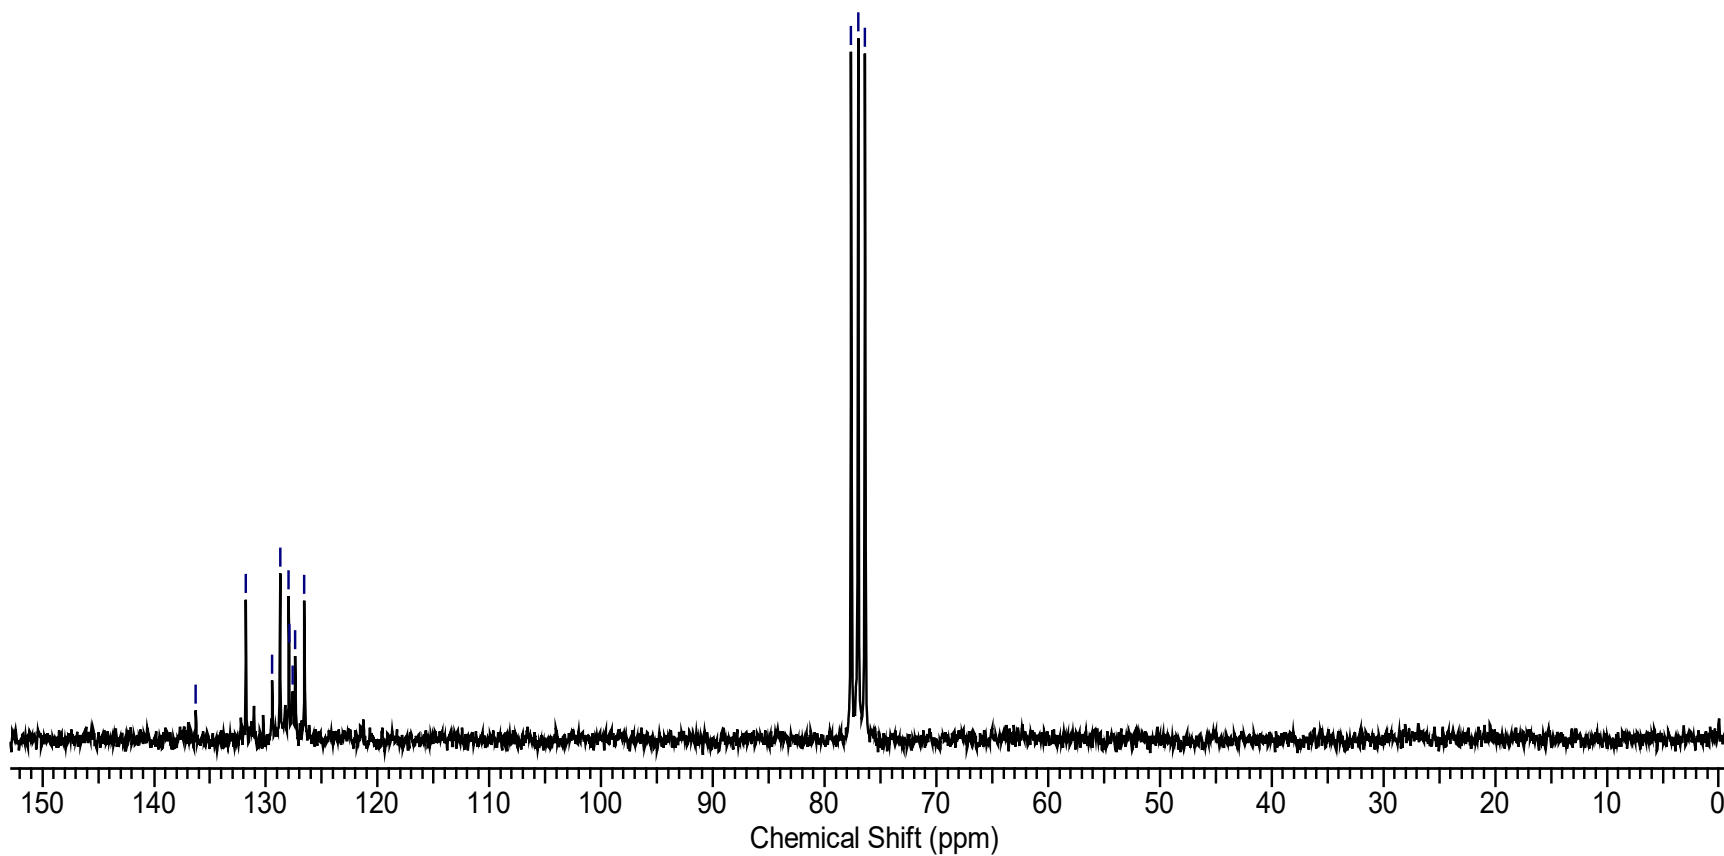

S70

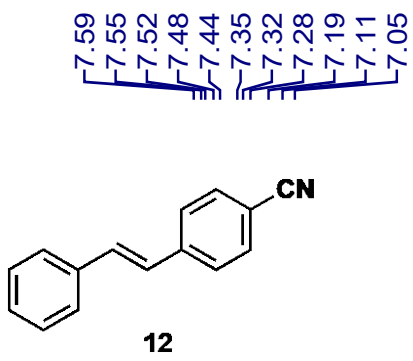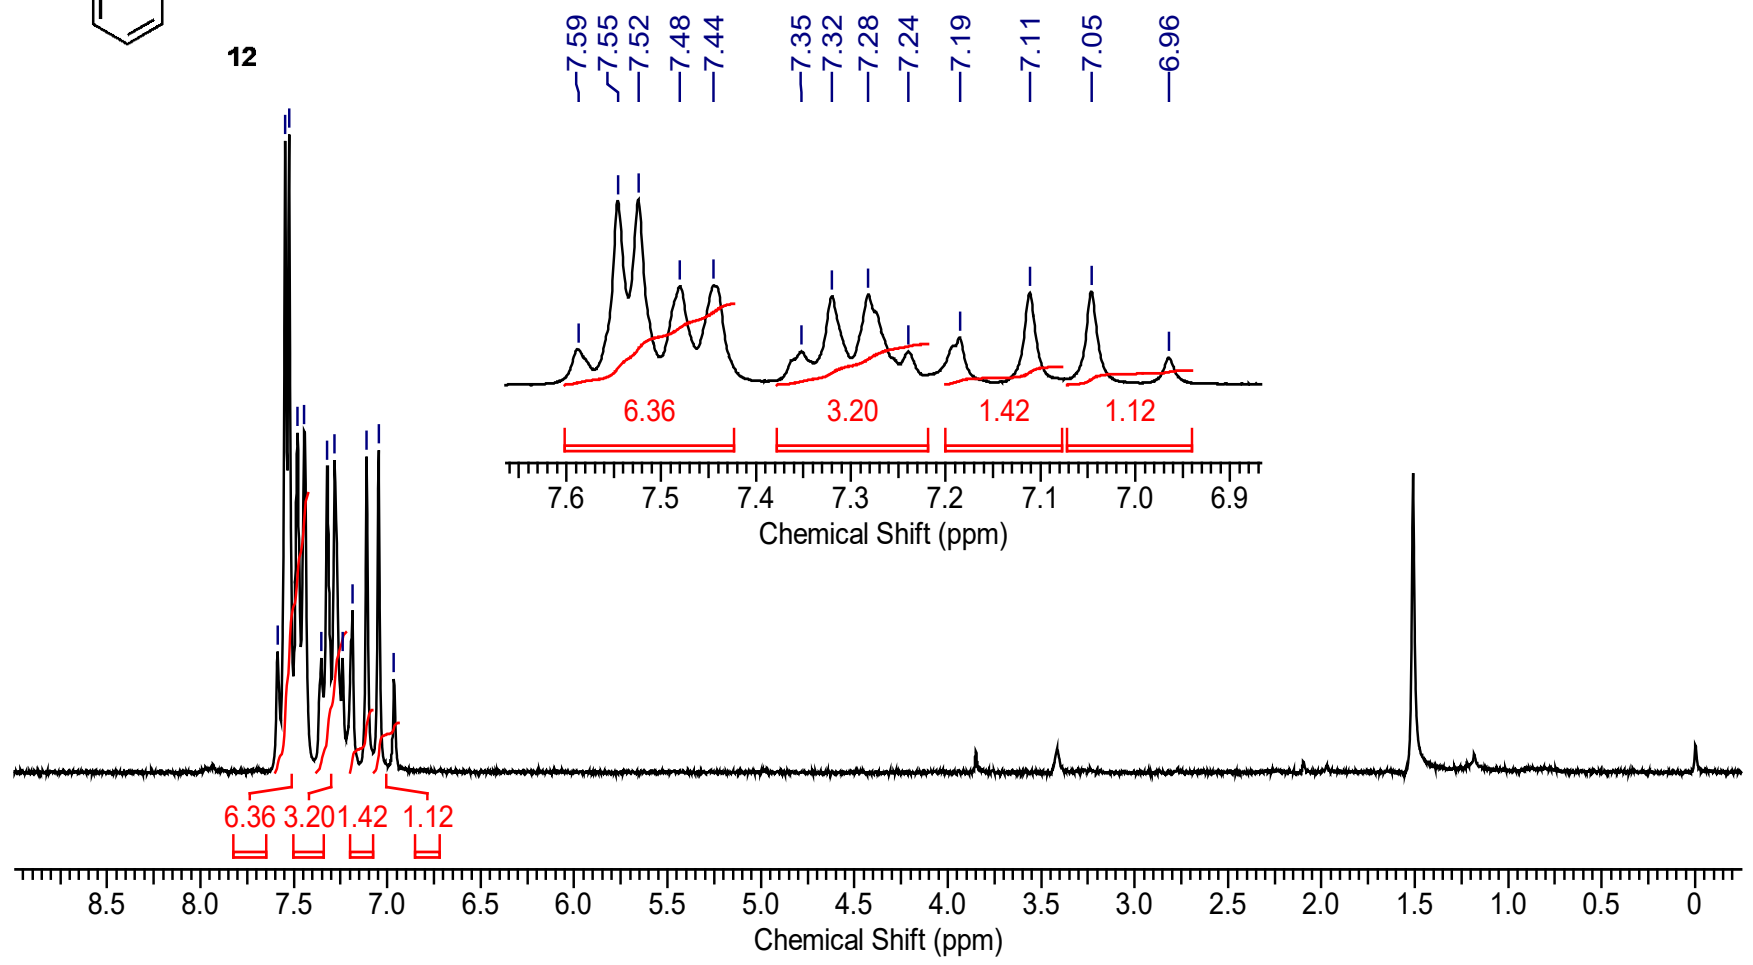

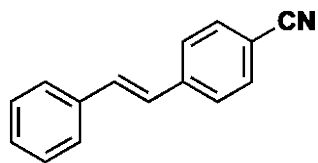

12

141.80  
136.25  
132.44  
128.82  
128.61  
126.87  
126.83  
126.69  
118.99  
110.54

77.64  
77.00  
76.37

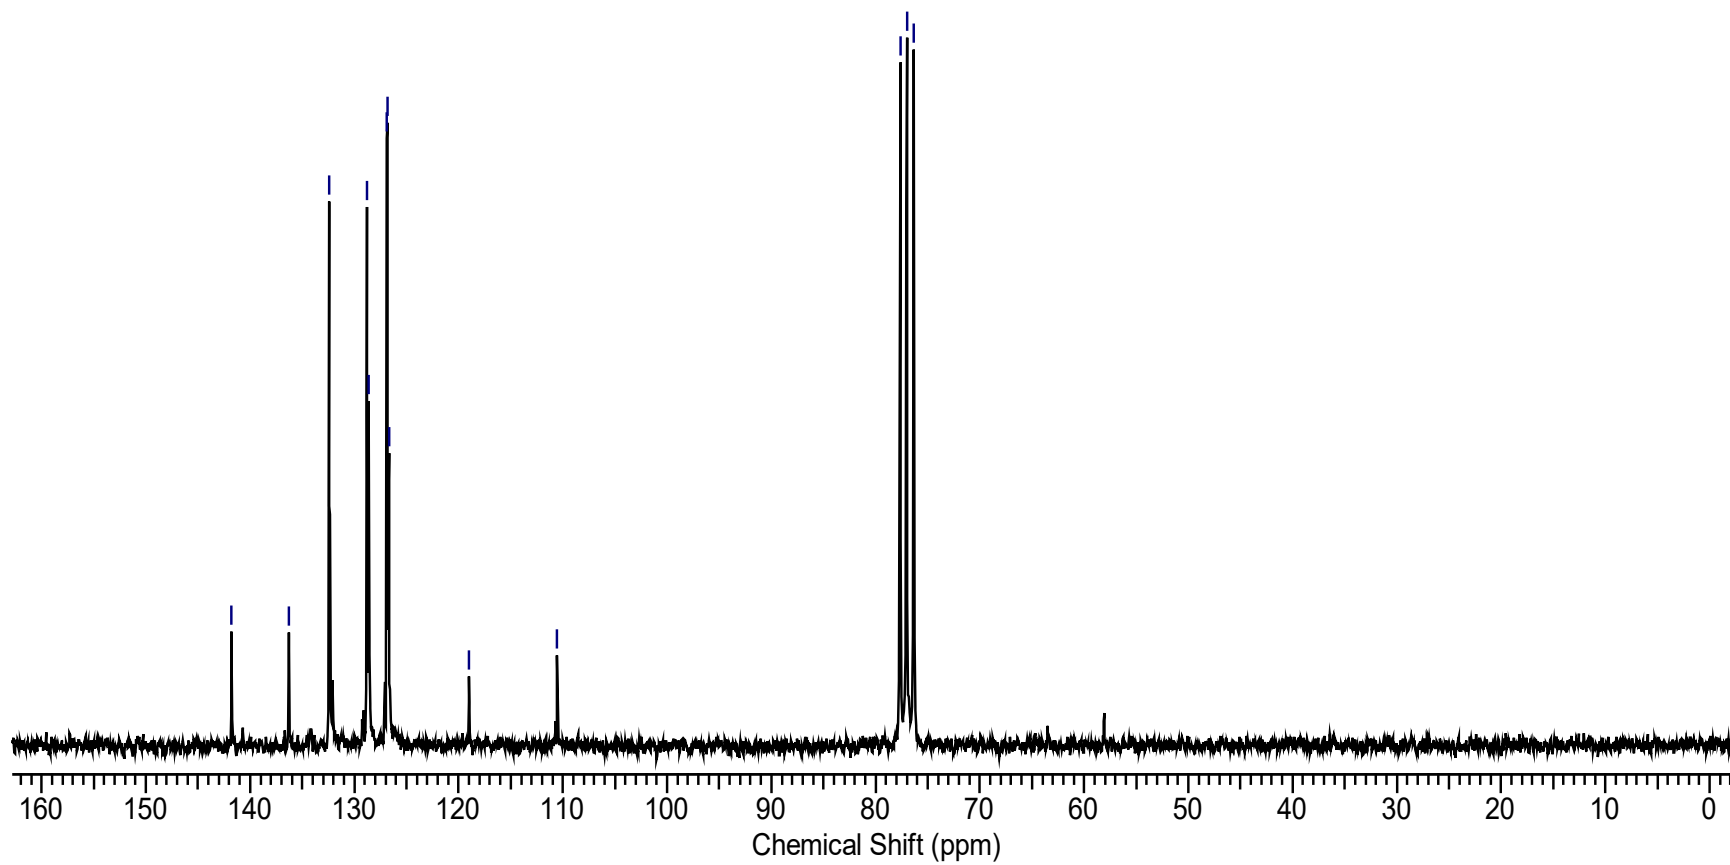



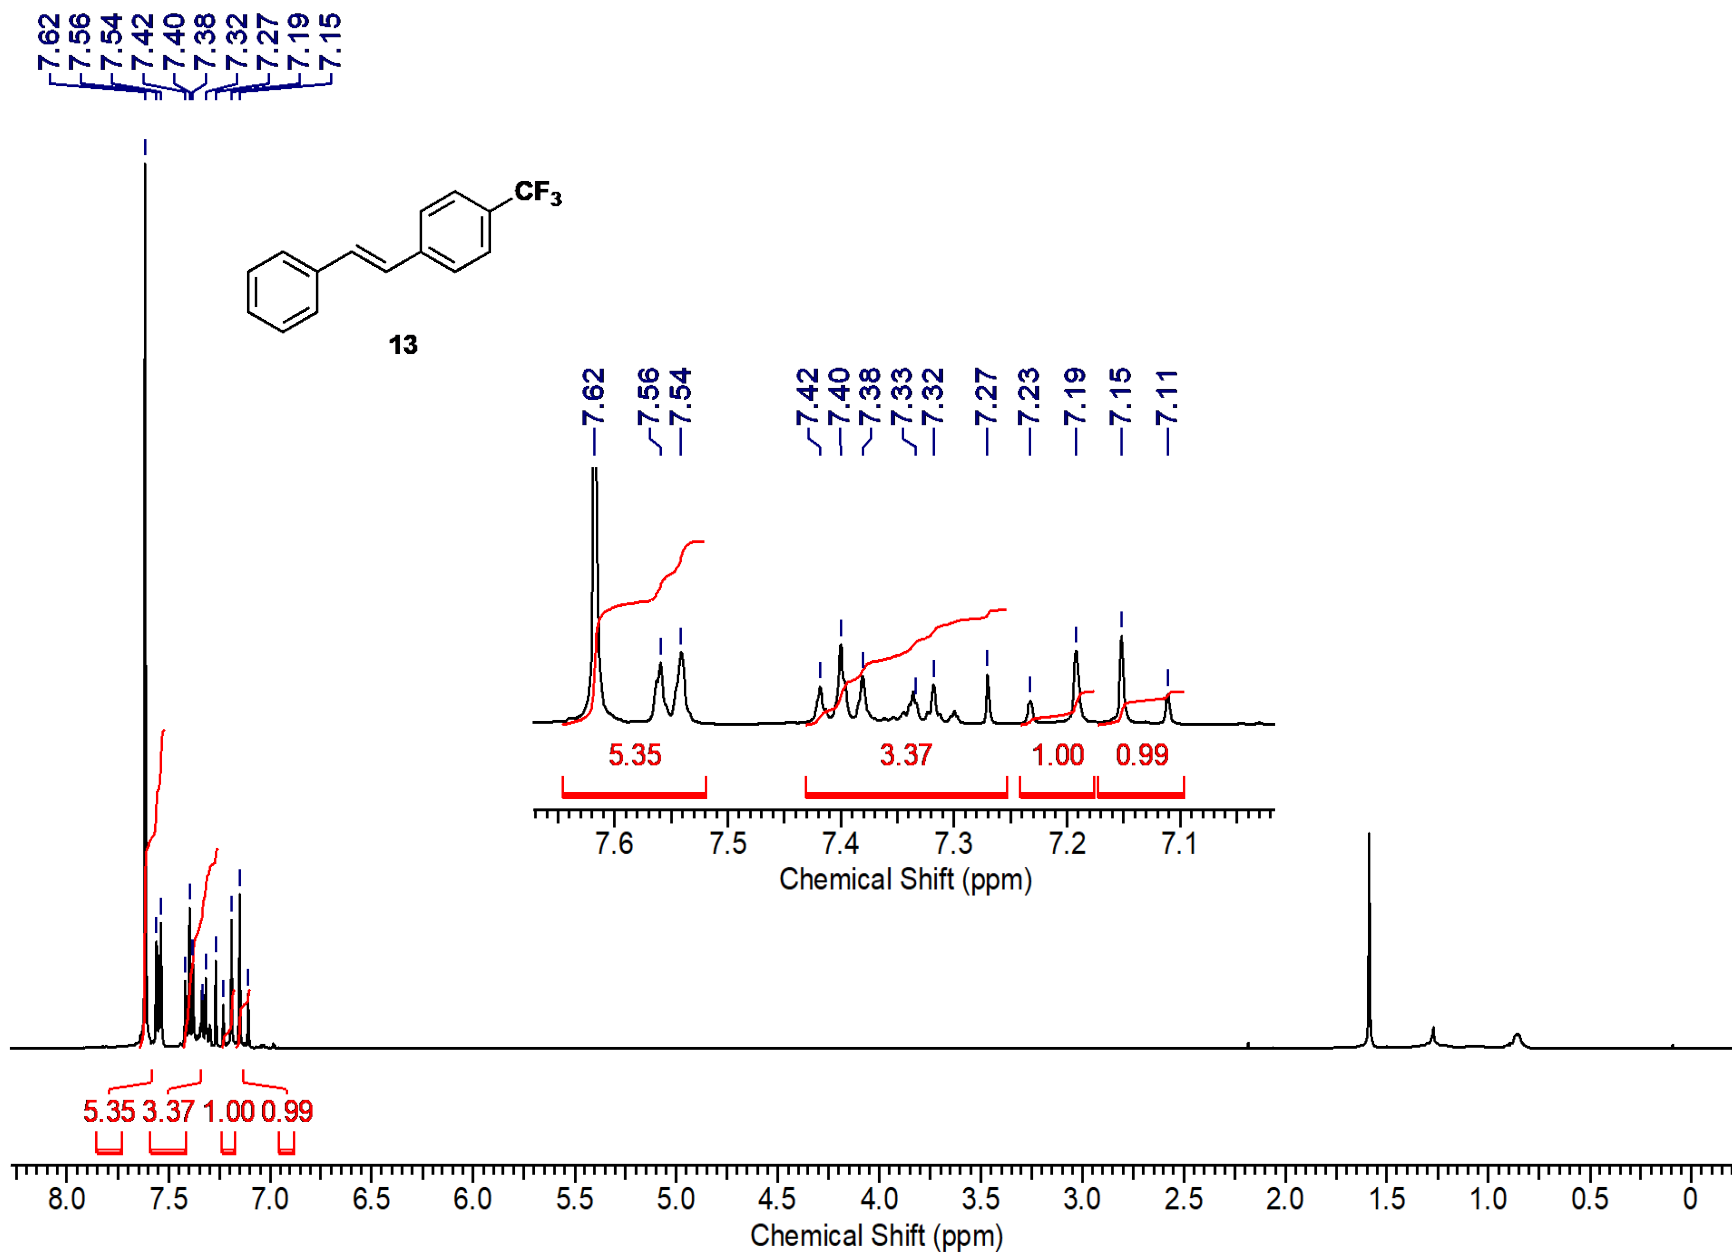

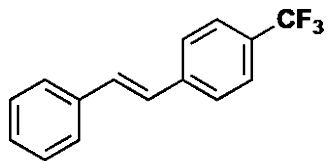

13

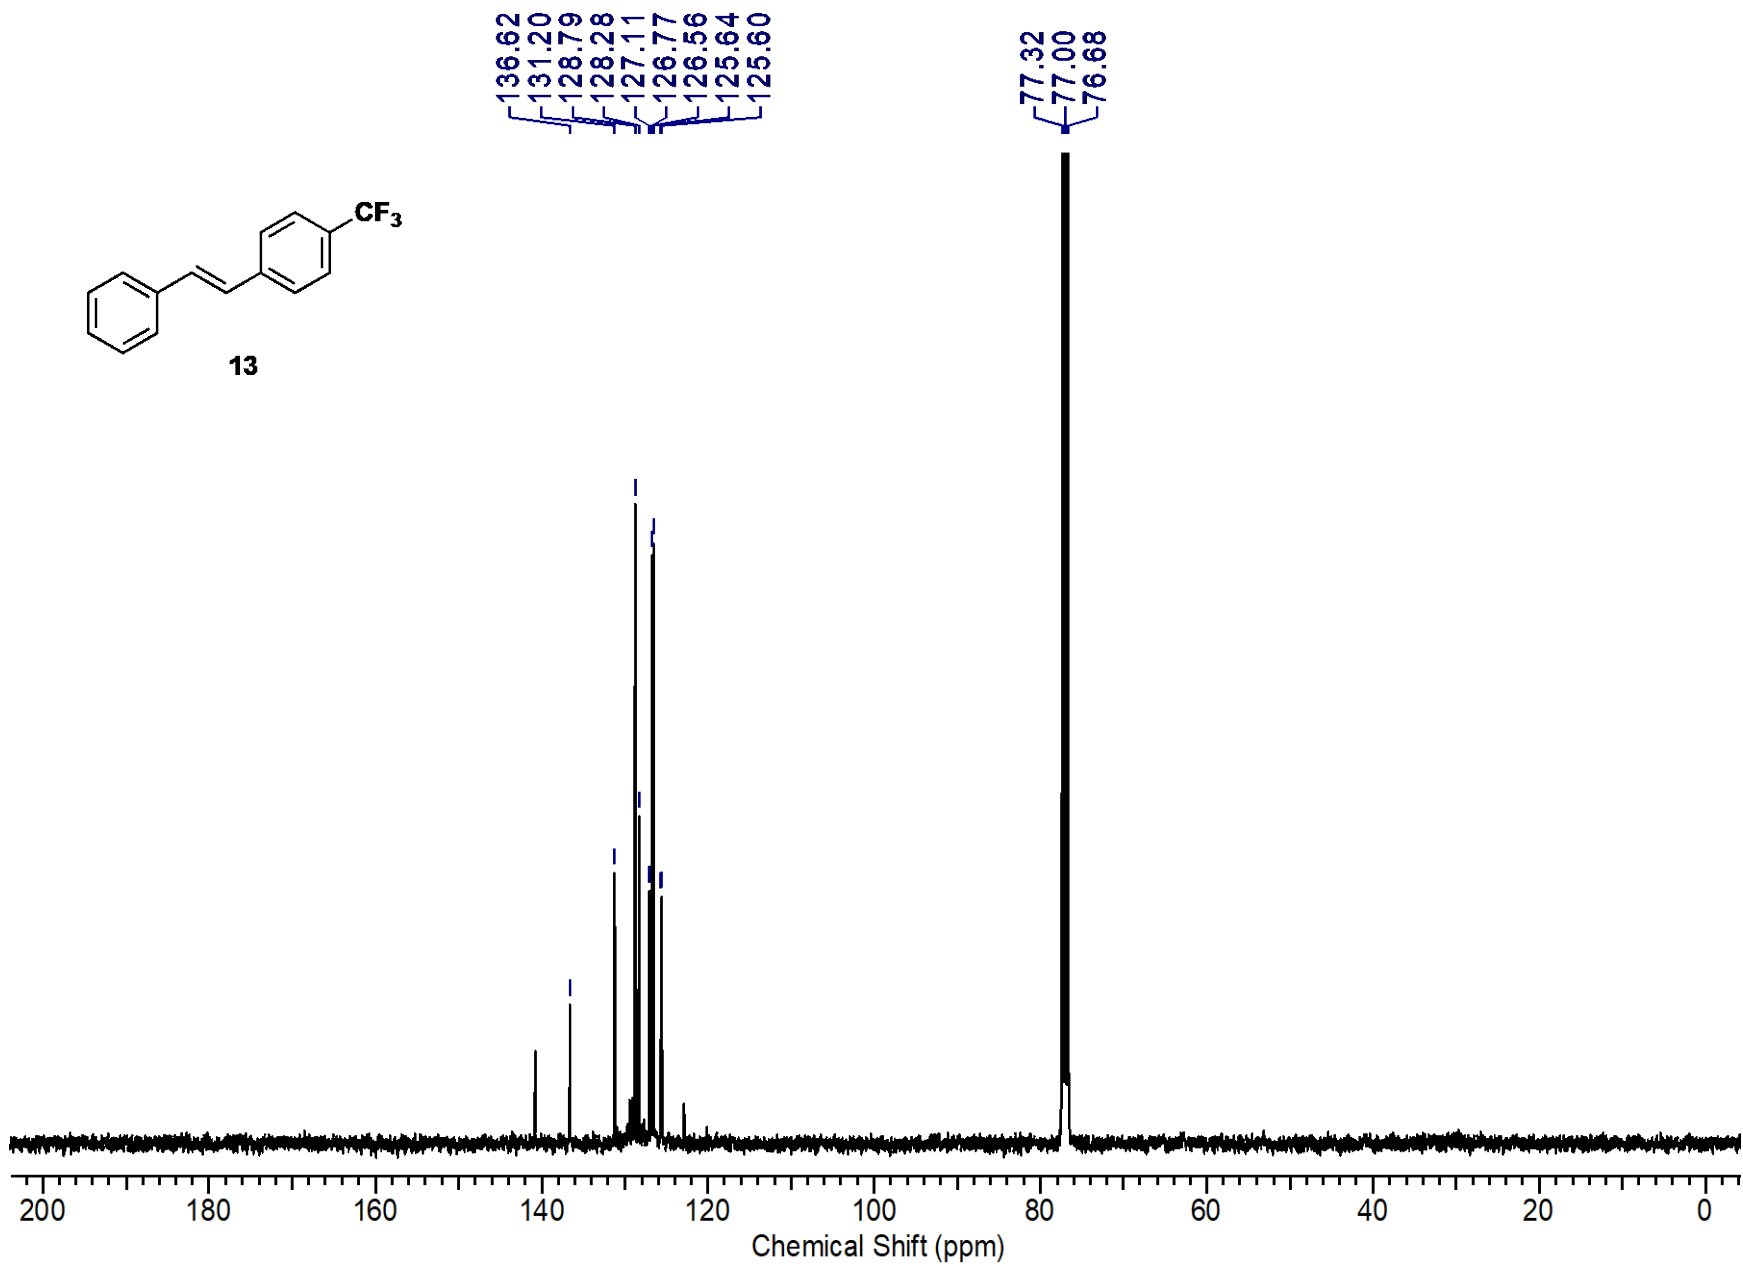

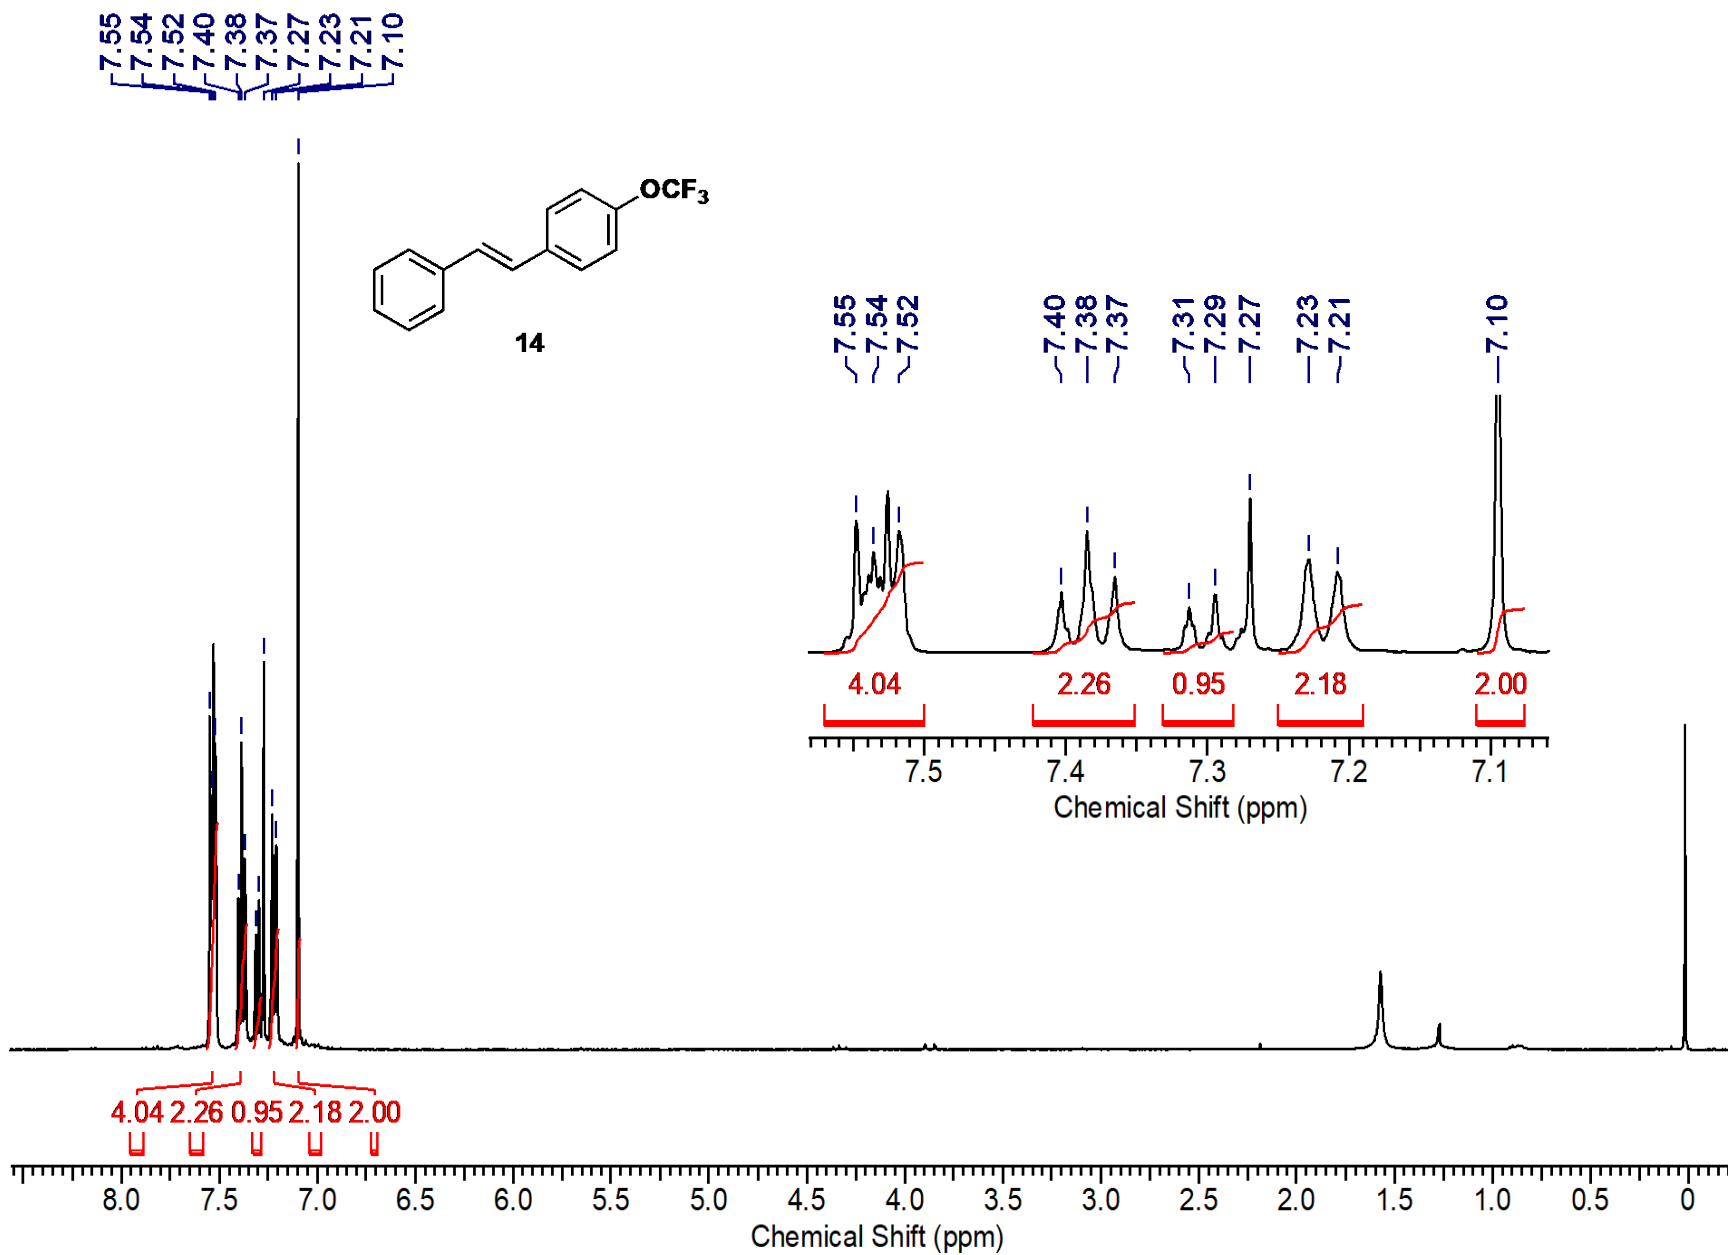

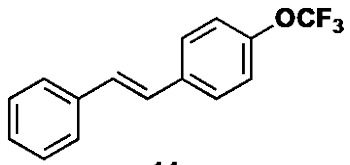

14

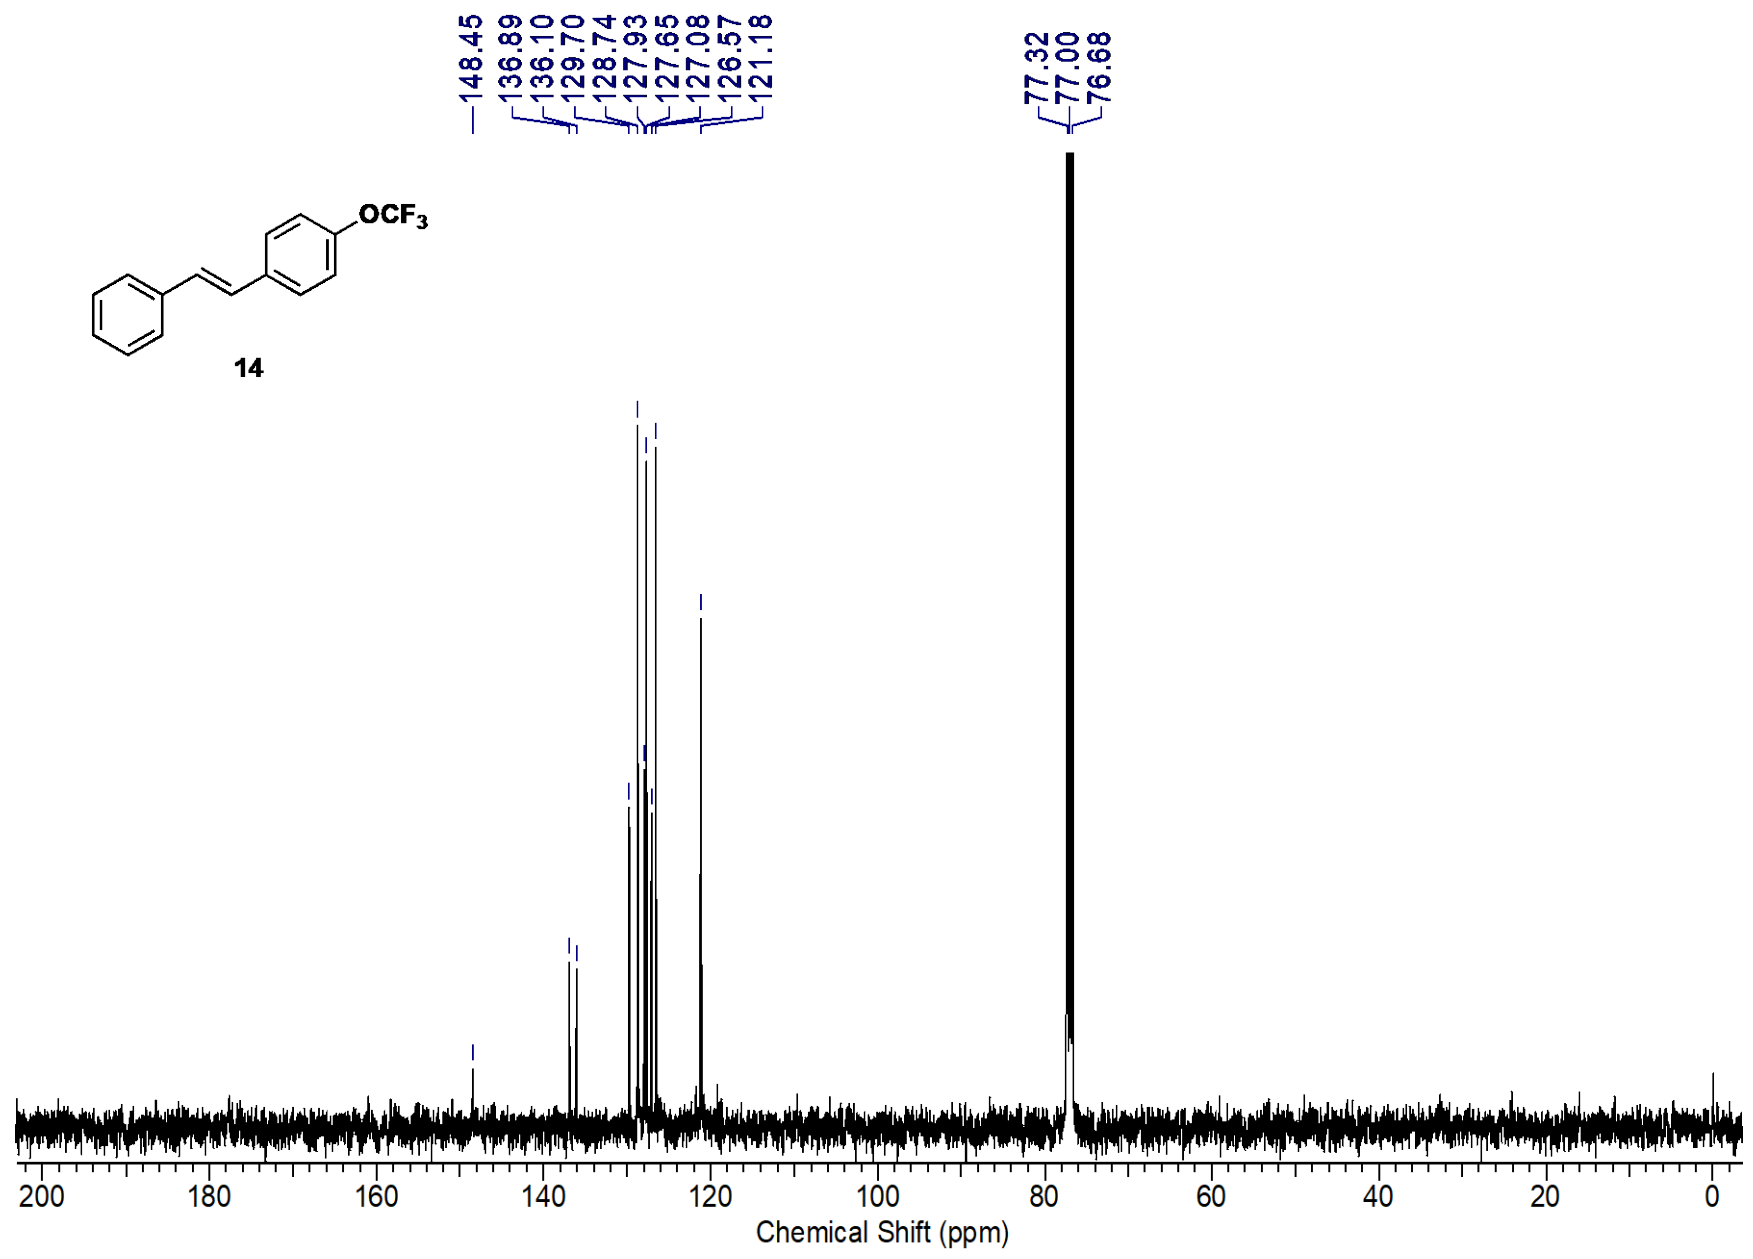

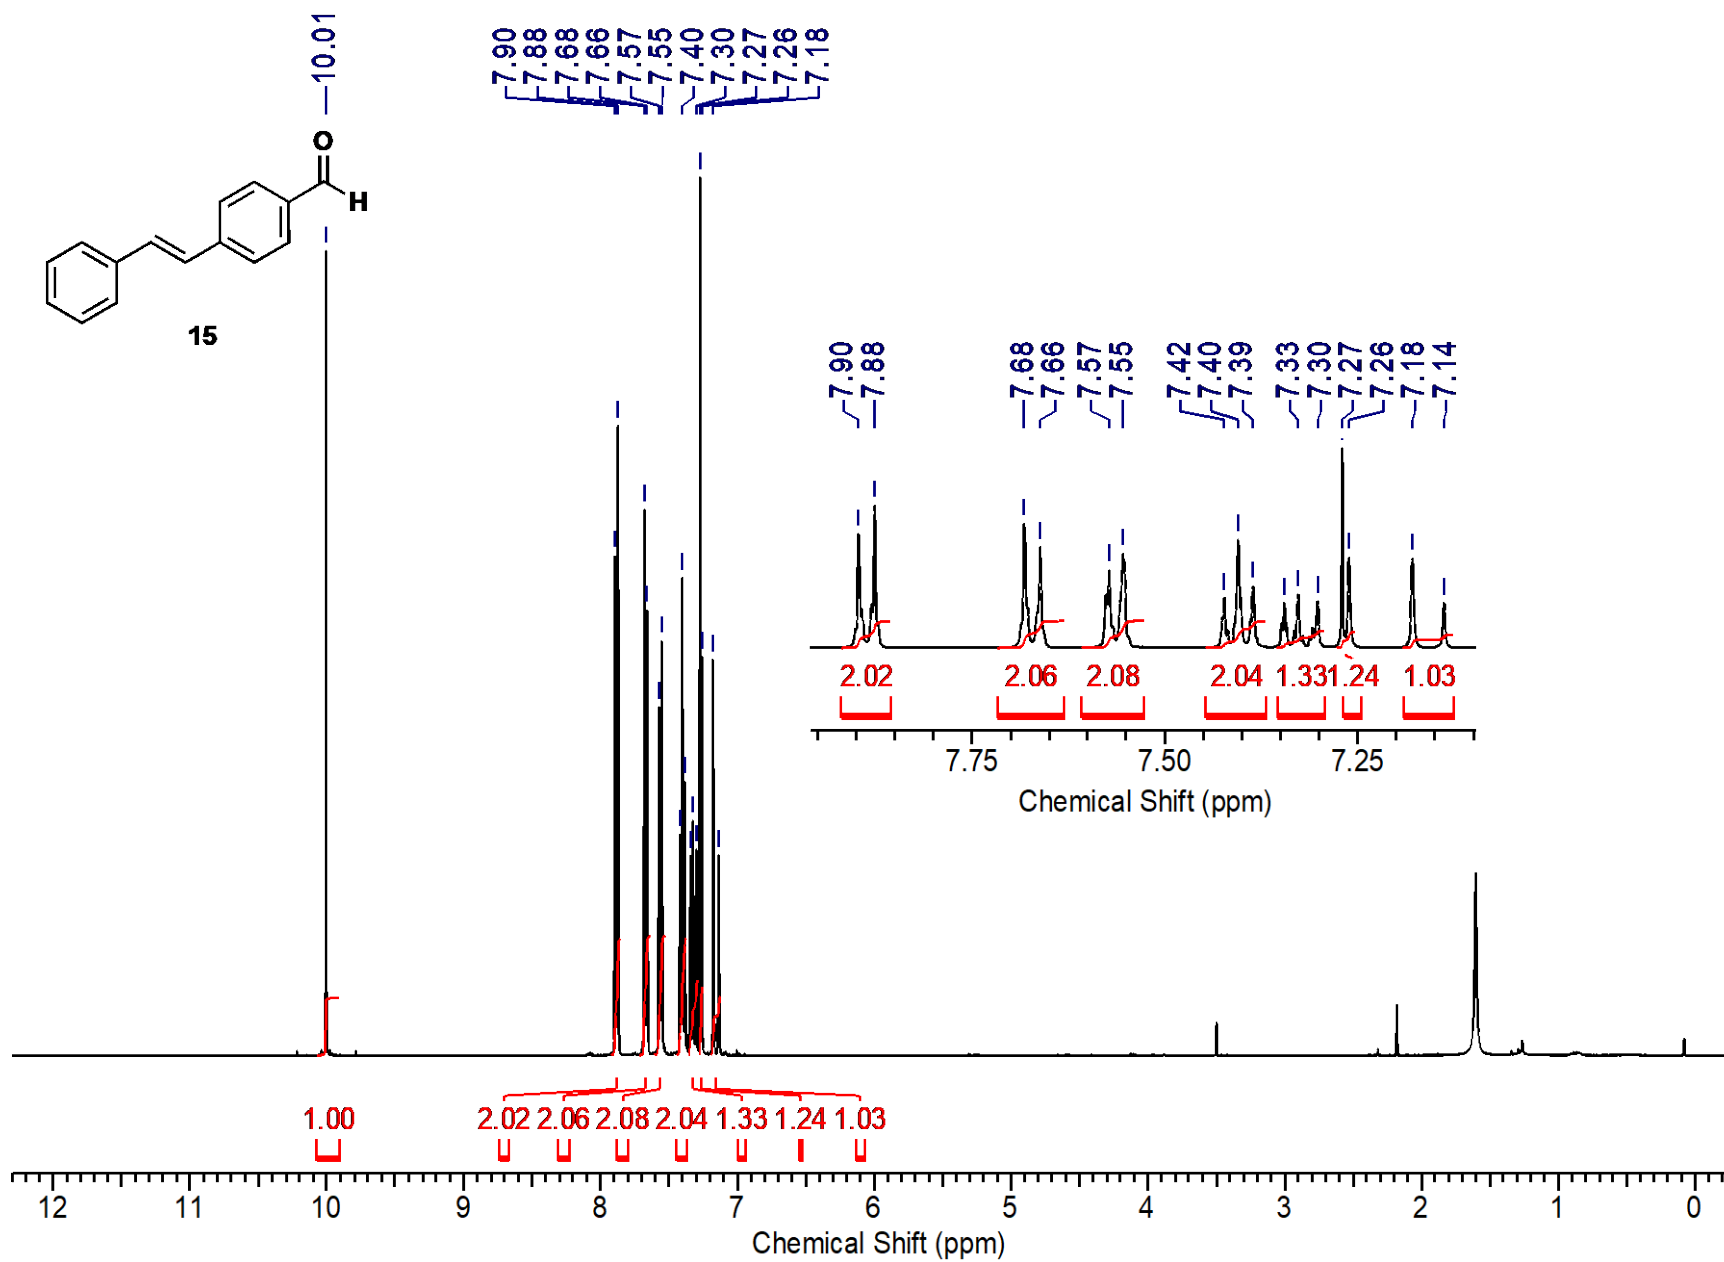

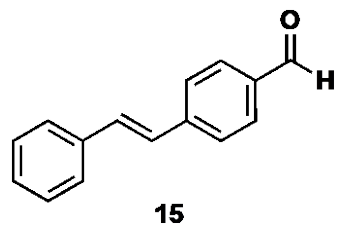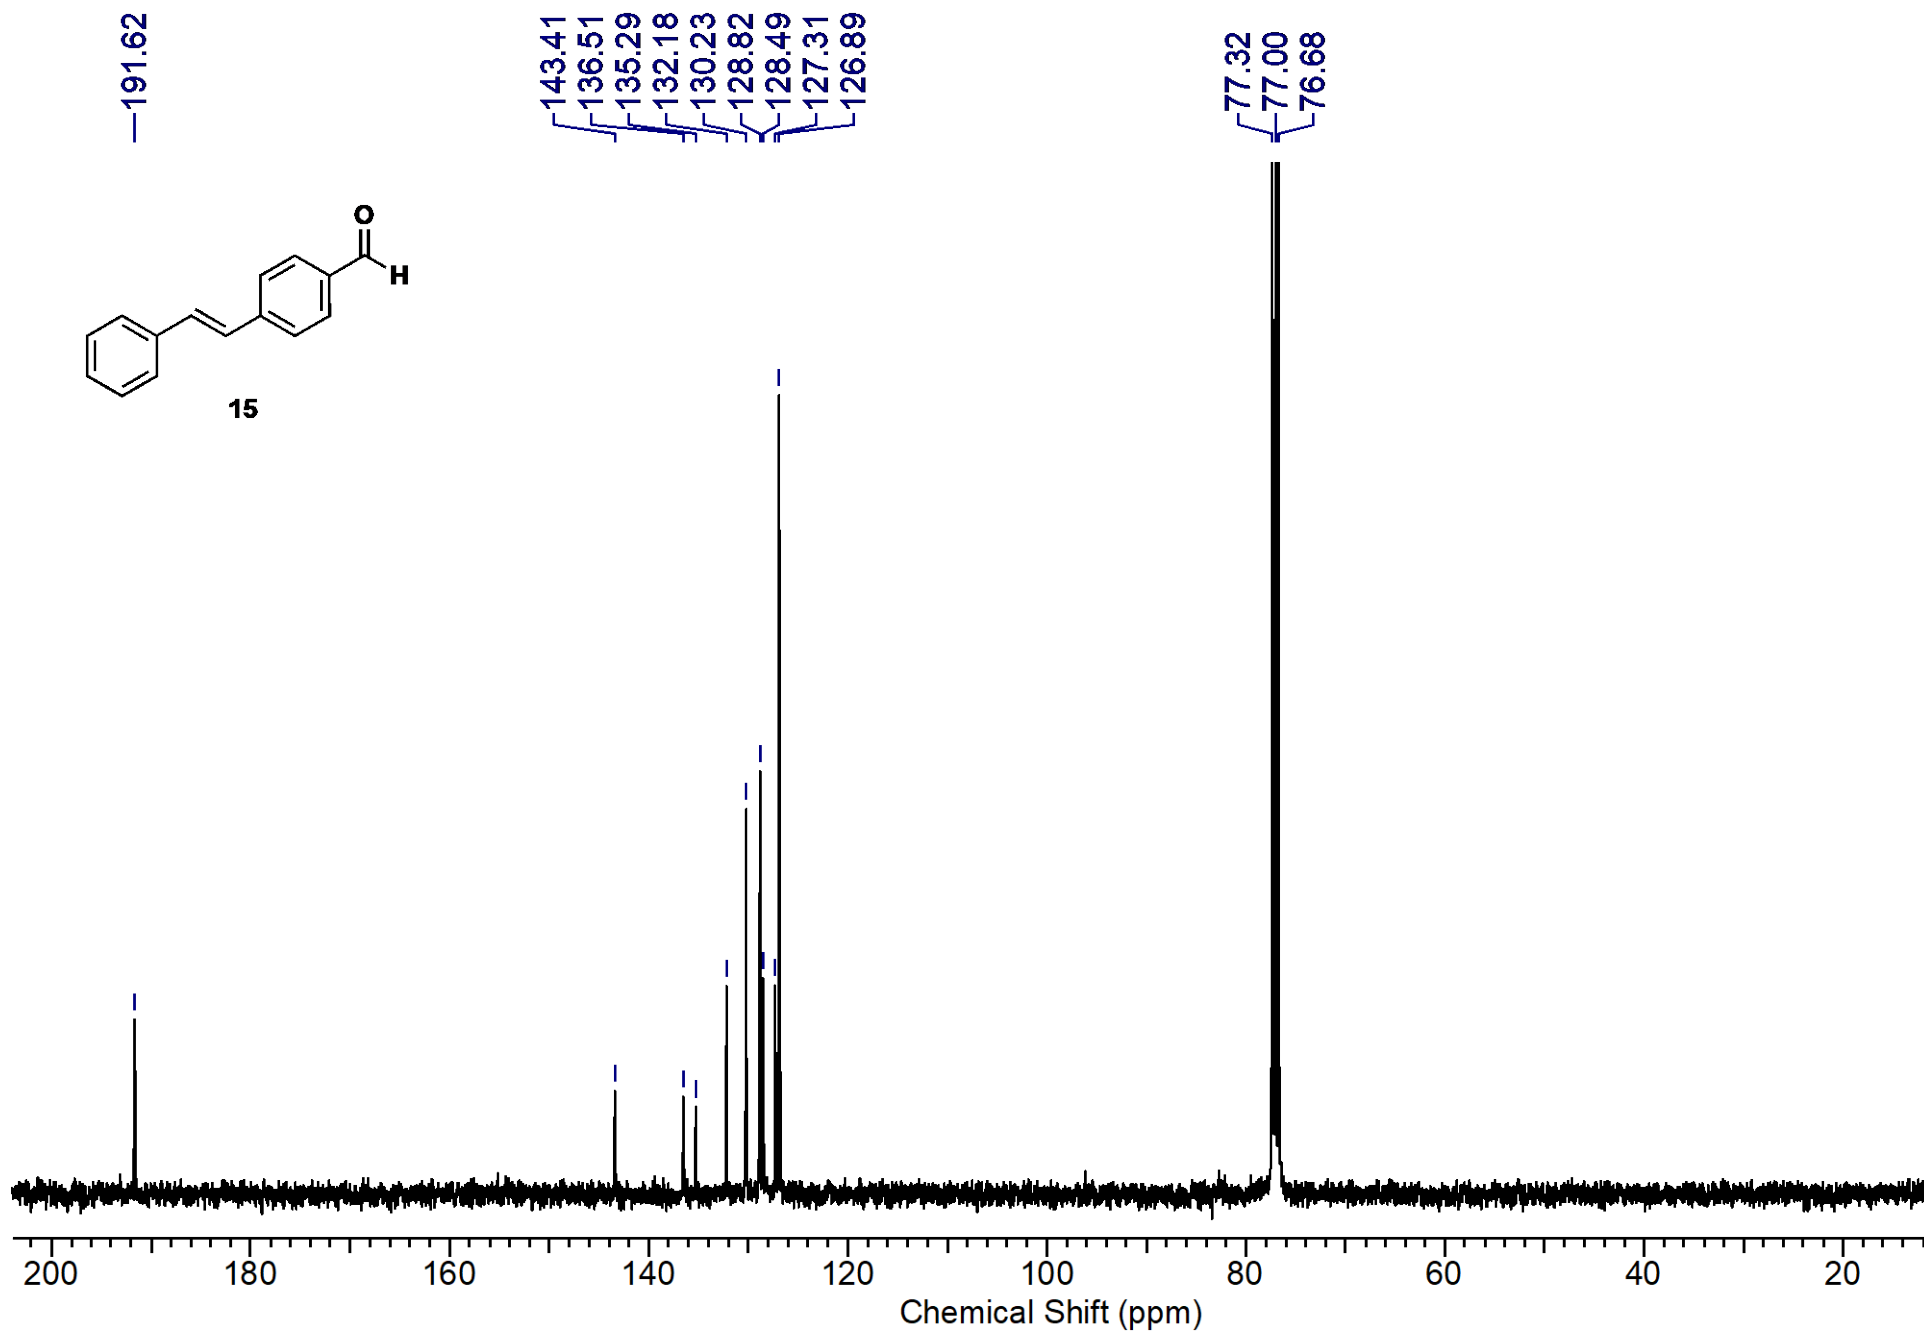

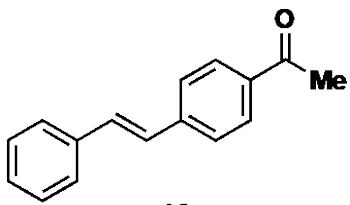

16

7.89  
7.87  
7.52  
7.50  
7.47  
7.46  
7.32  
7.31  
7.29  
7.23  
7.14  
7.07

7.89  
7.87

7.52  
7.50  
7.47  
7.46  
7.32  
7.31  
7.29  
7.24  
7.23  
7.17  
7.14  
7.07  
7.04

2.53

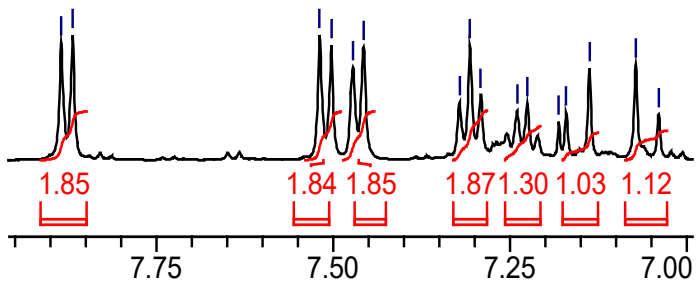

Chemical Shift (ppm)

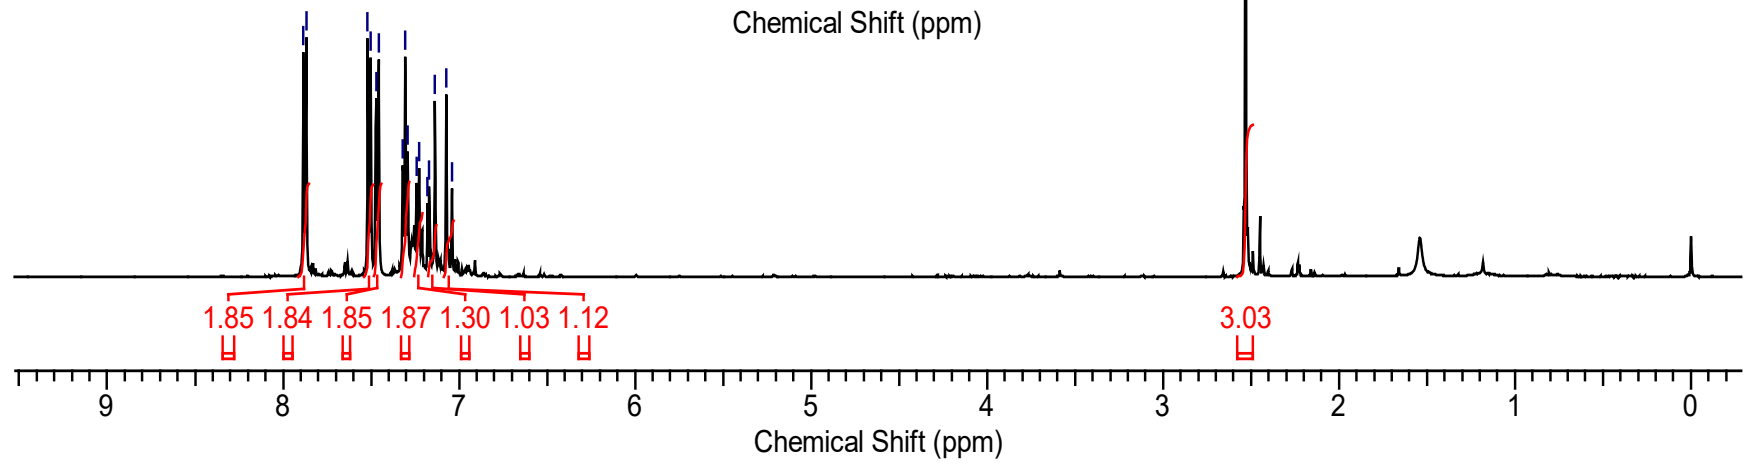

Chemical Shift (ppm)

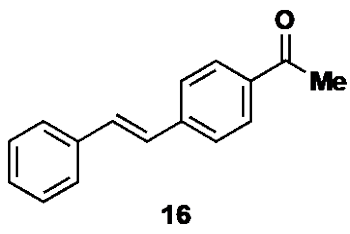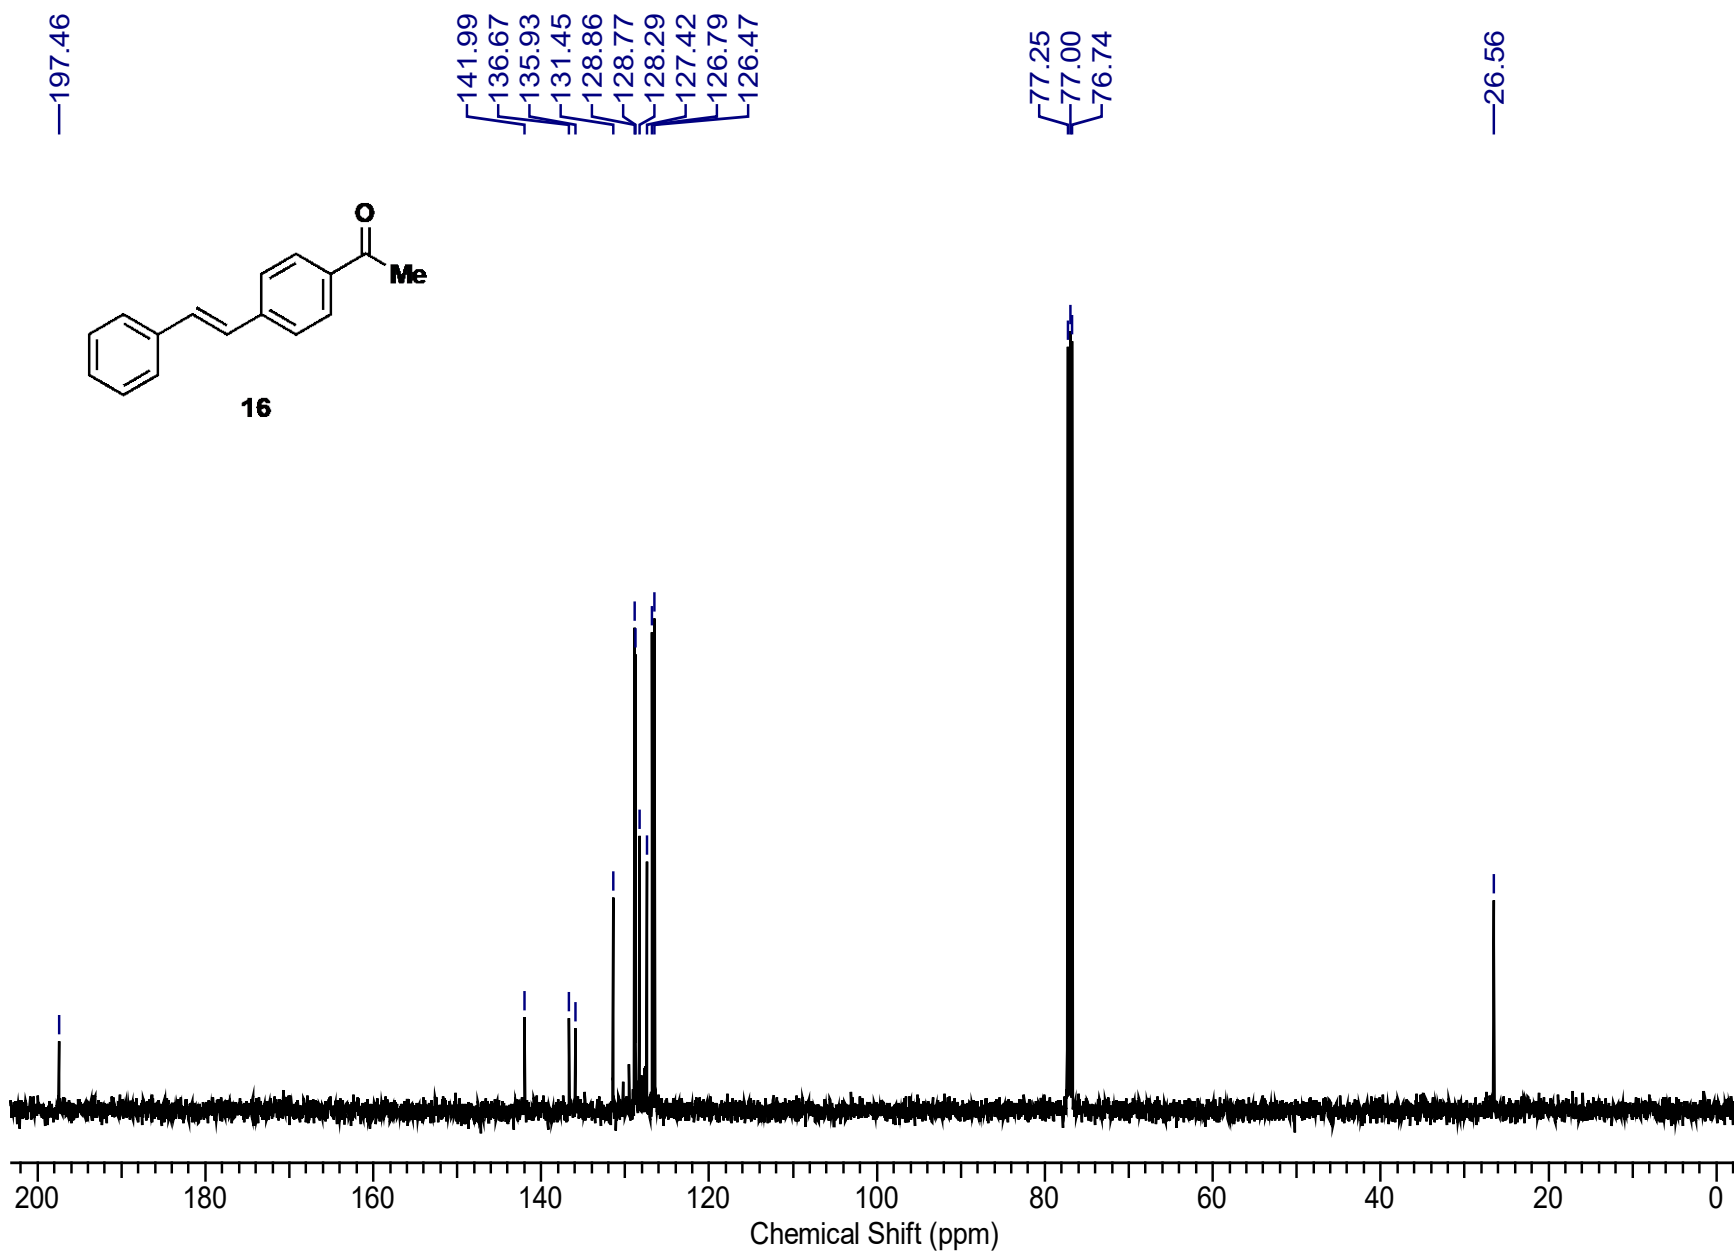



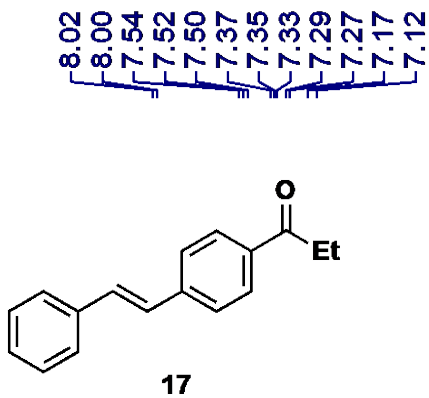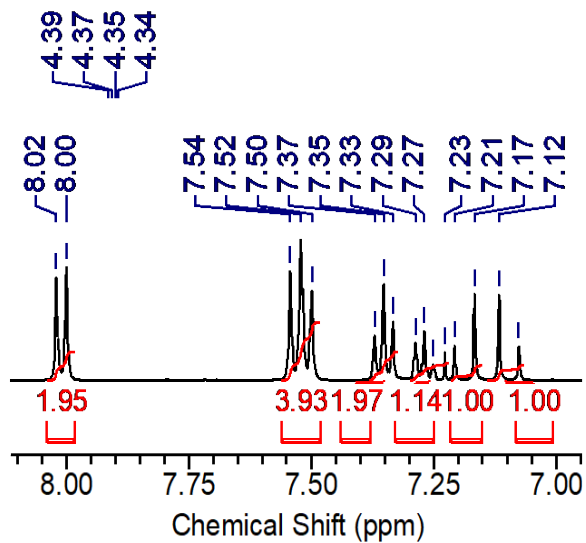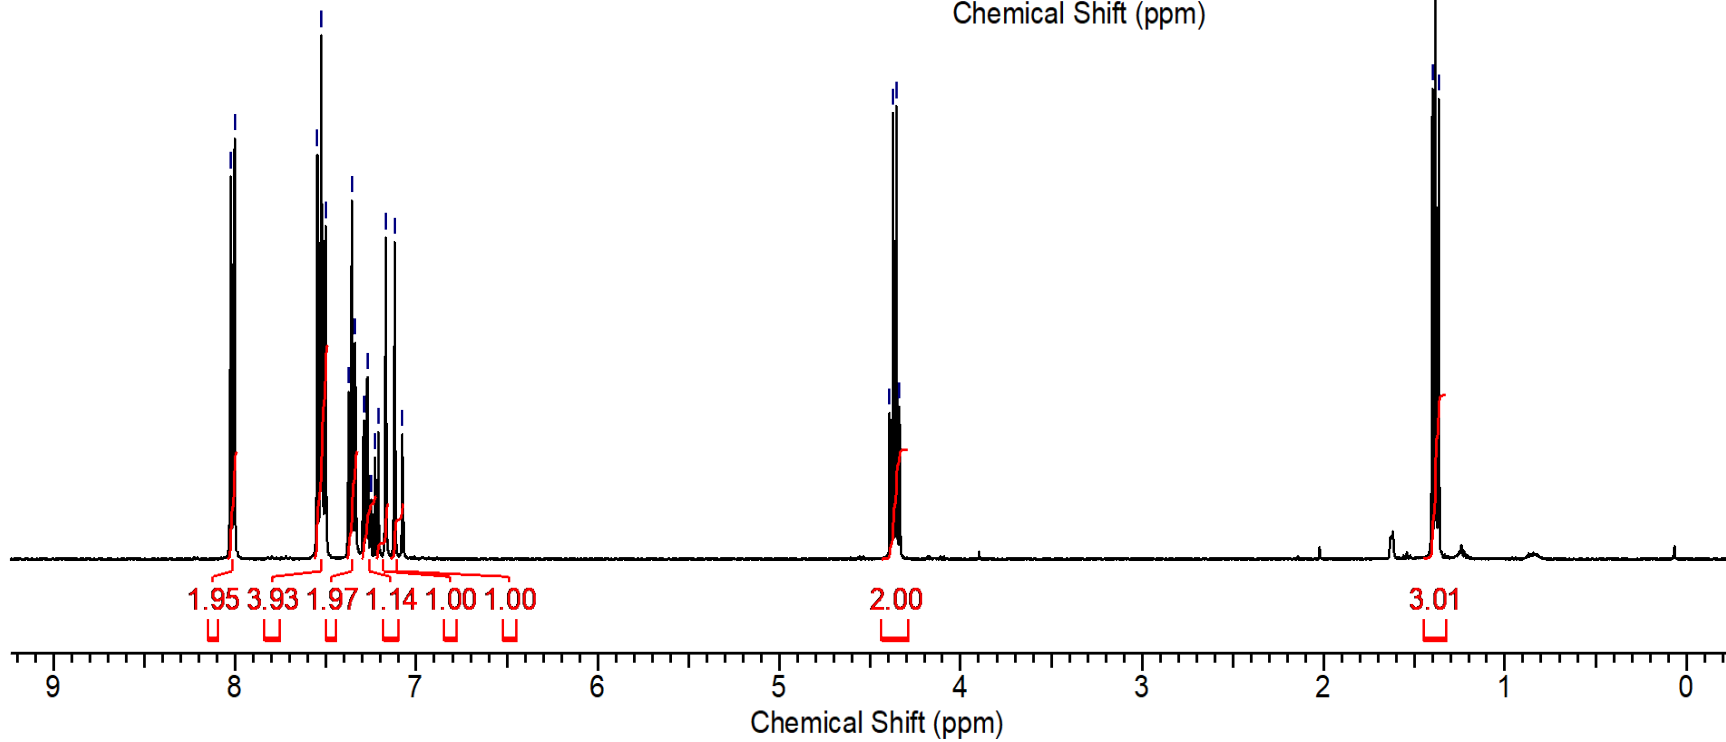

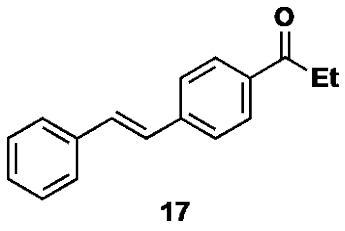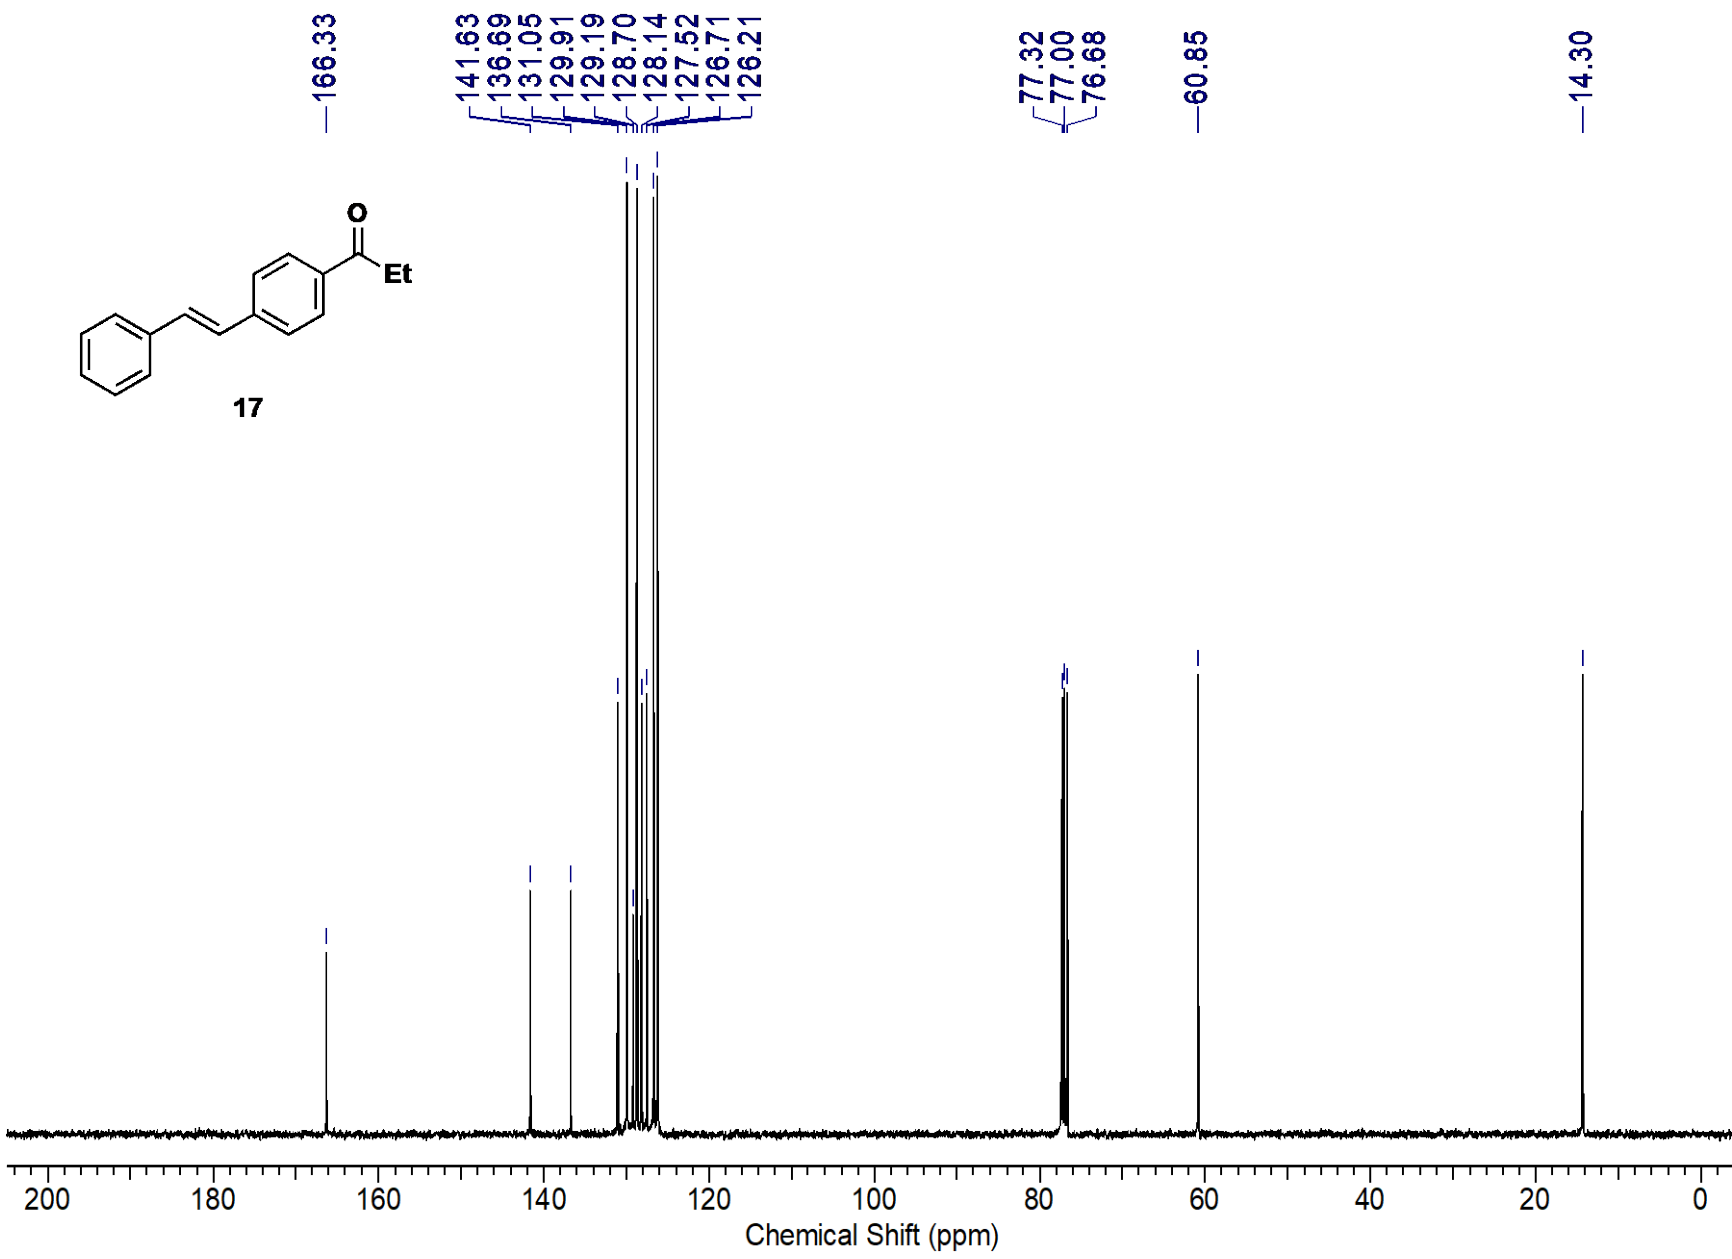

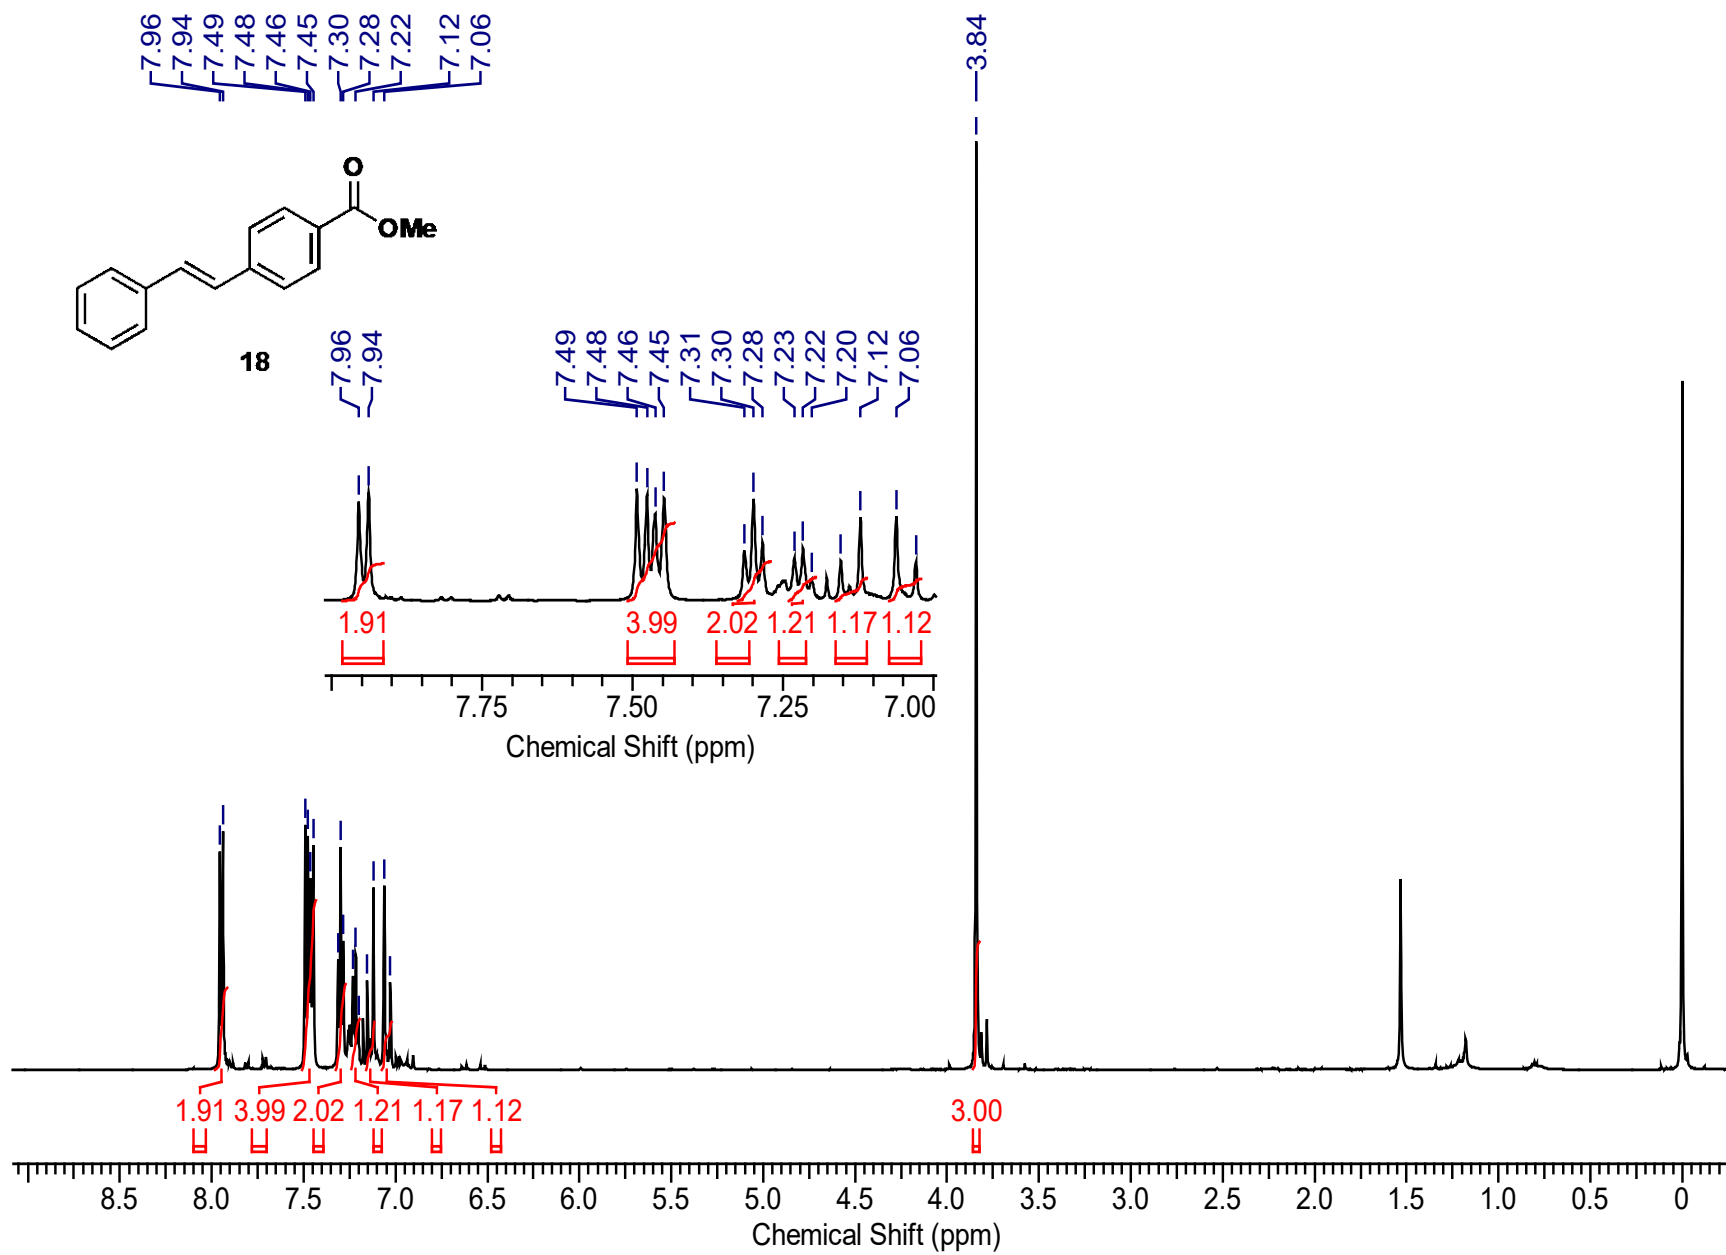

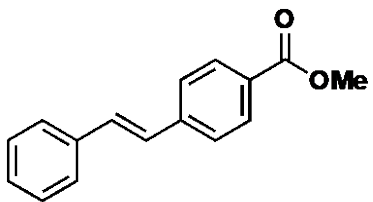

18

—166.87

141.81  
136.73  
131.21  
130.01  
128.89  
128.76  
128.22  
127.54  
126.76  
126.29

77.26  
77.00  
76.75

—52.05

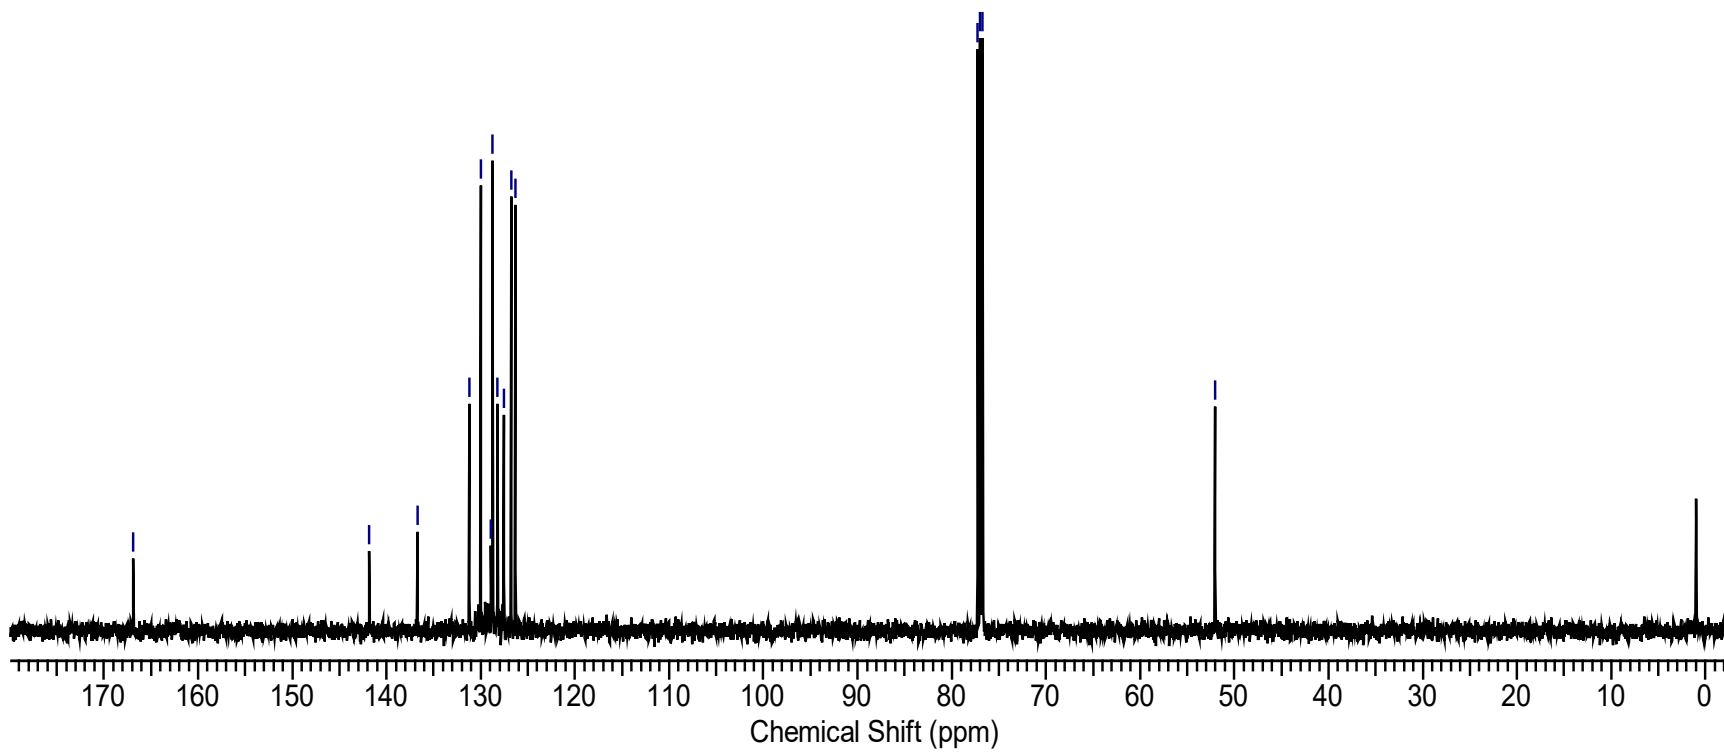

8.05  
8.00  
7.57  
7.55  
7.54  
7.52  
7.51  
7.50  
7.37  
7.33  
7.17  
7.14

4.43  
4.39  
4.36  
4.32

1.43  
1.39  
1.36

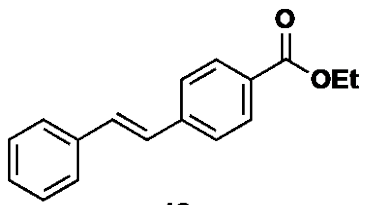

19

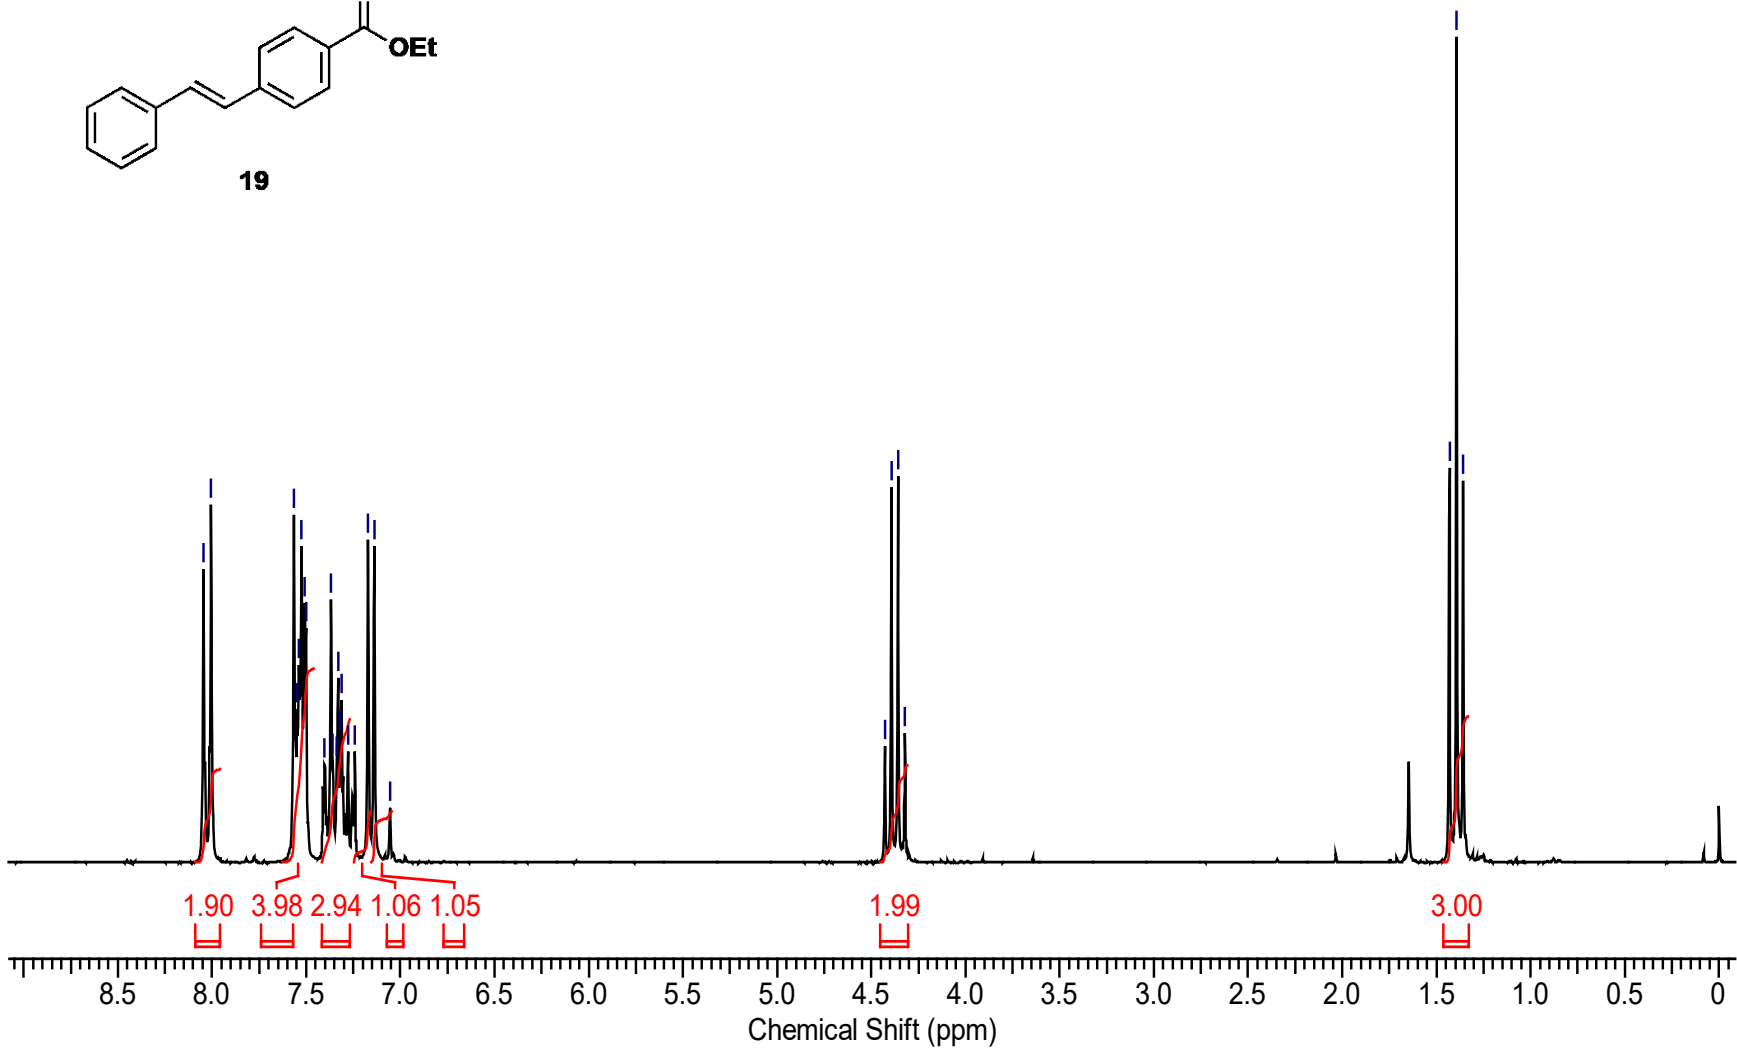

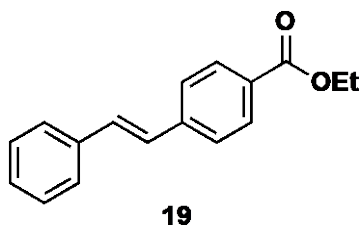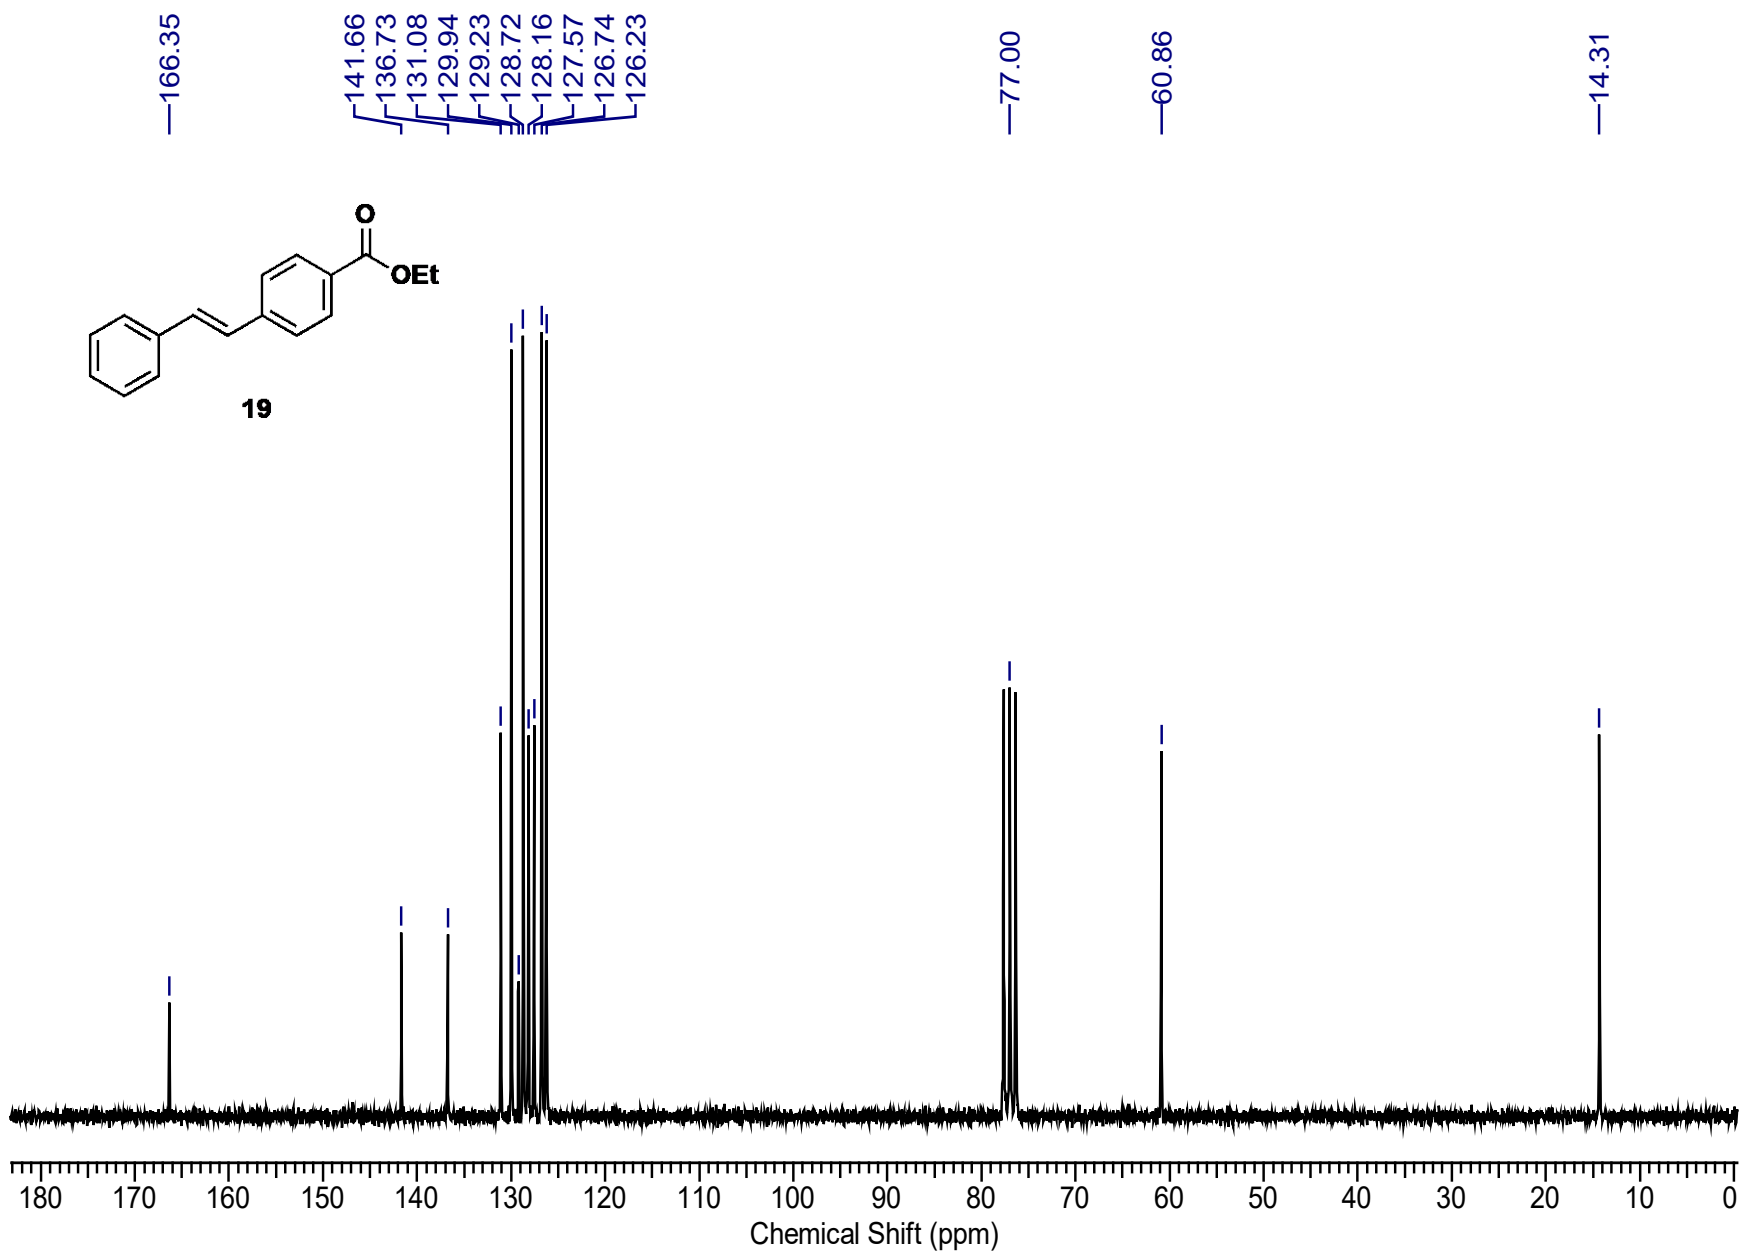

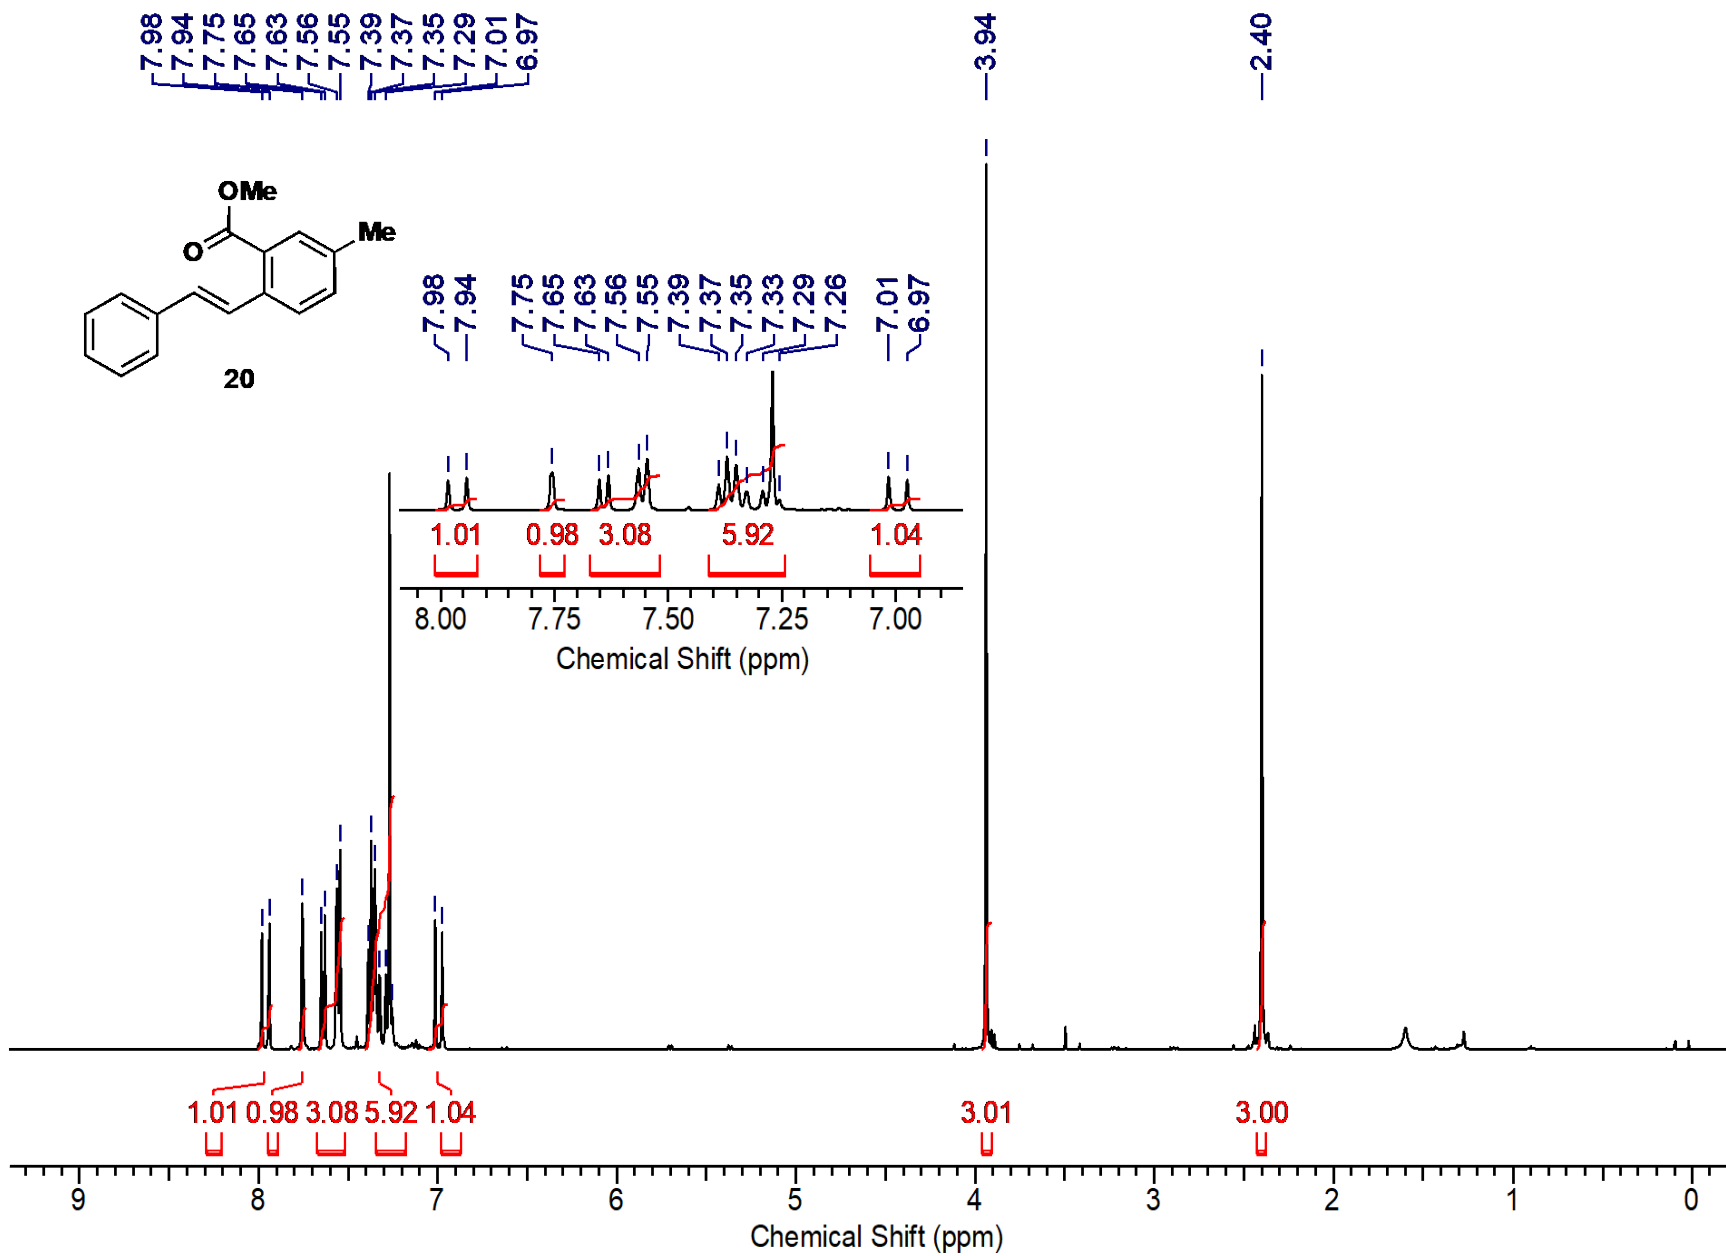

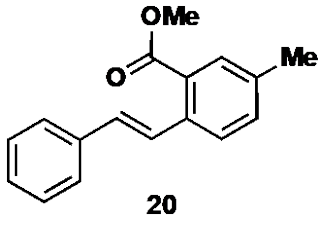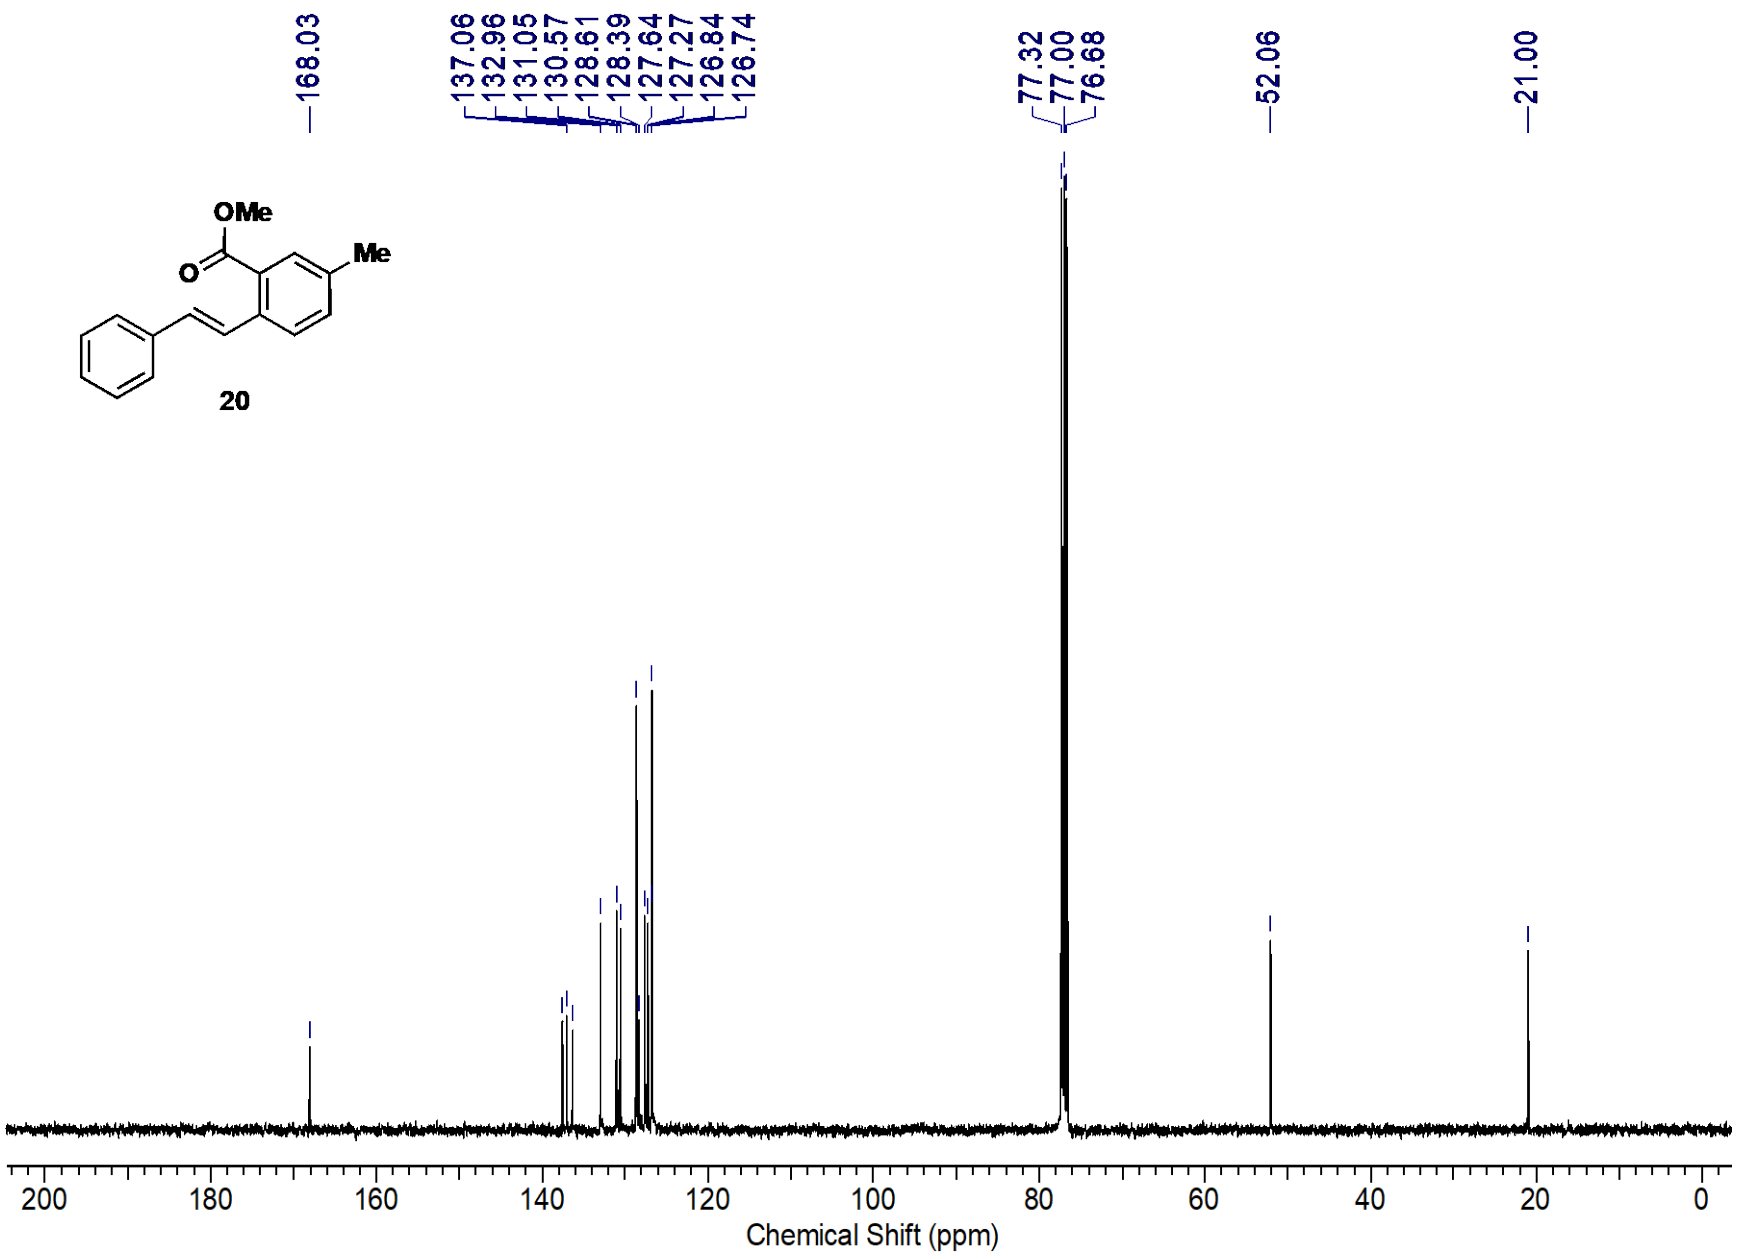



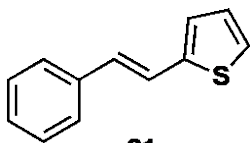

21

7.47  
7.46  
7.36  
7.29  
7.27  
7.21  
7.08  
7.04  
7.01  
6.98

7.51  
7.50  
7.47  
7.46  
7.39  
7.36  
7.35  
7.32  
7.29  
7.27  
7.26  
7.21  
7.20  
7.19  
7.09  
7.08  
7.04  
7.02  
7.01  
7.00  
6.98  
6.90

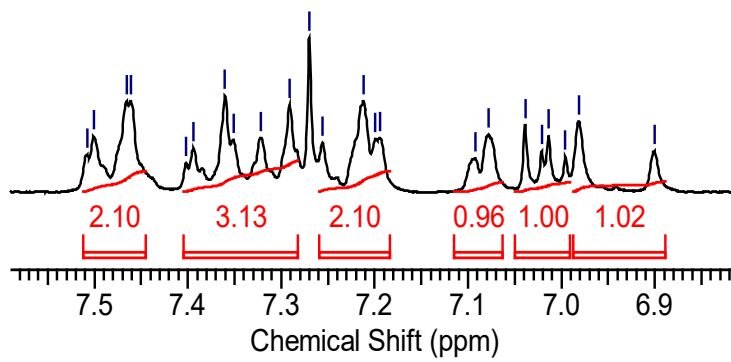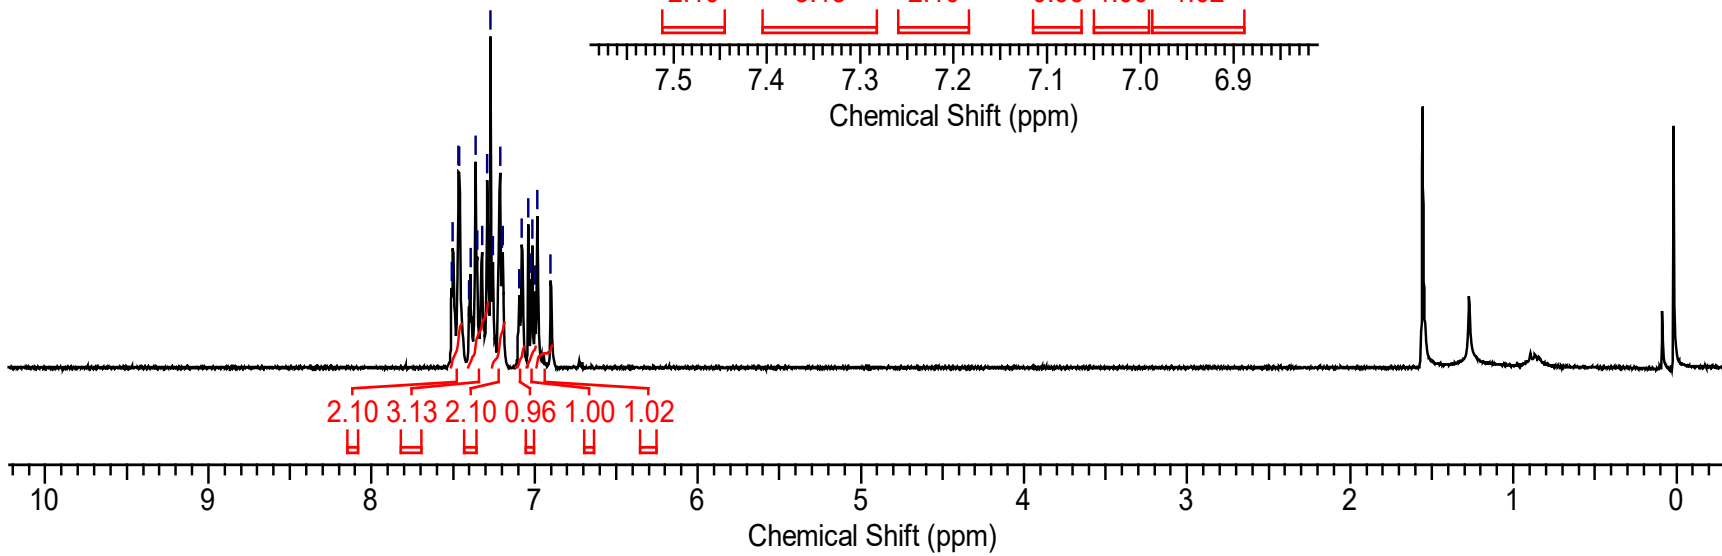

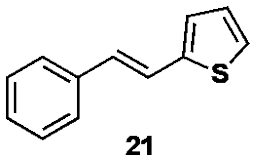

- 142.87
- 136.95
- 128.68
- 128.32
- 127.57
- 126.28
- 126.07
- 124.32
- 121.76

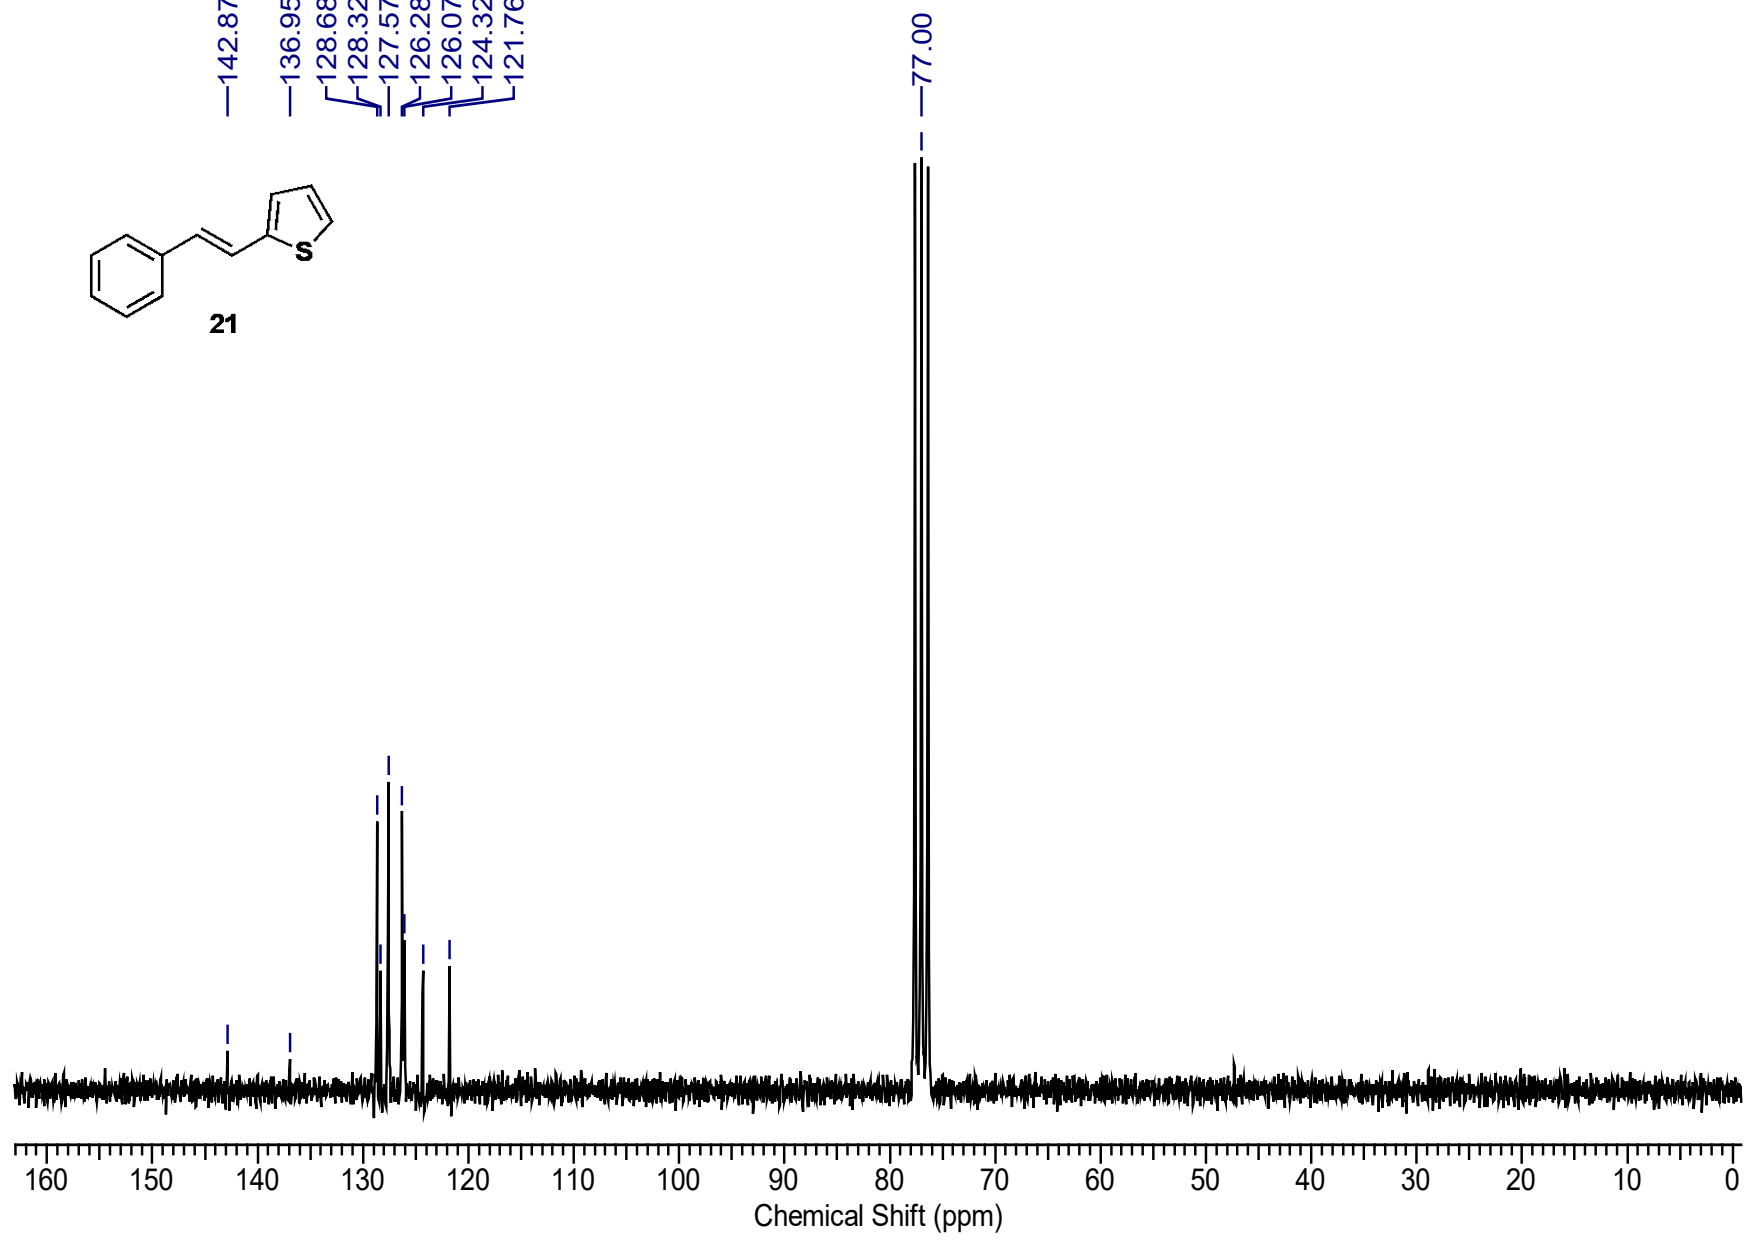

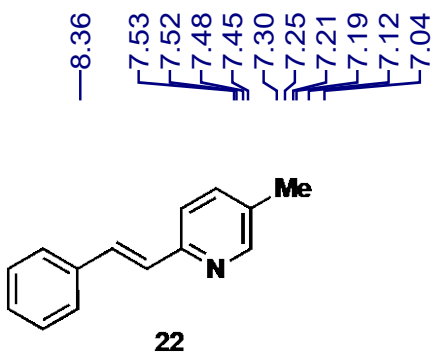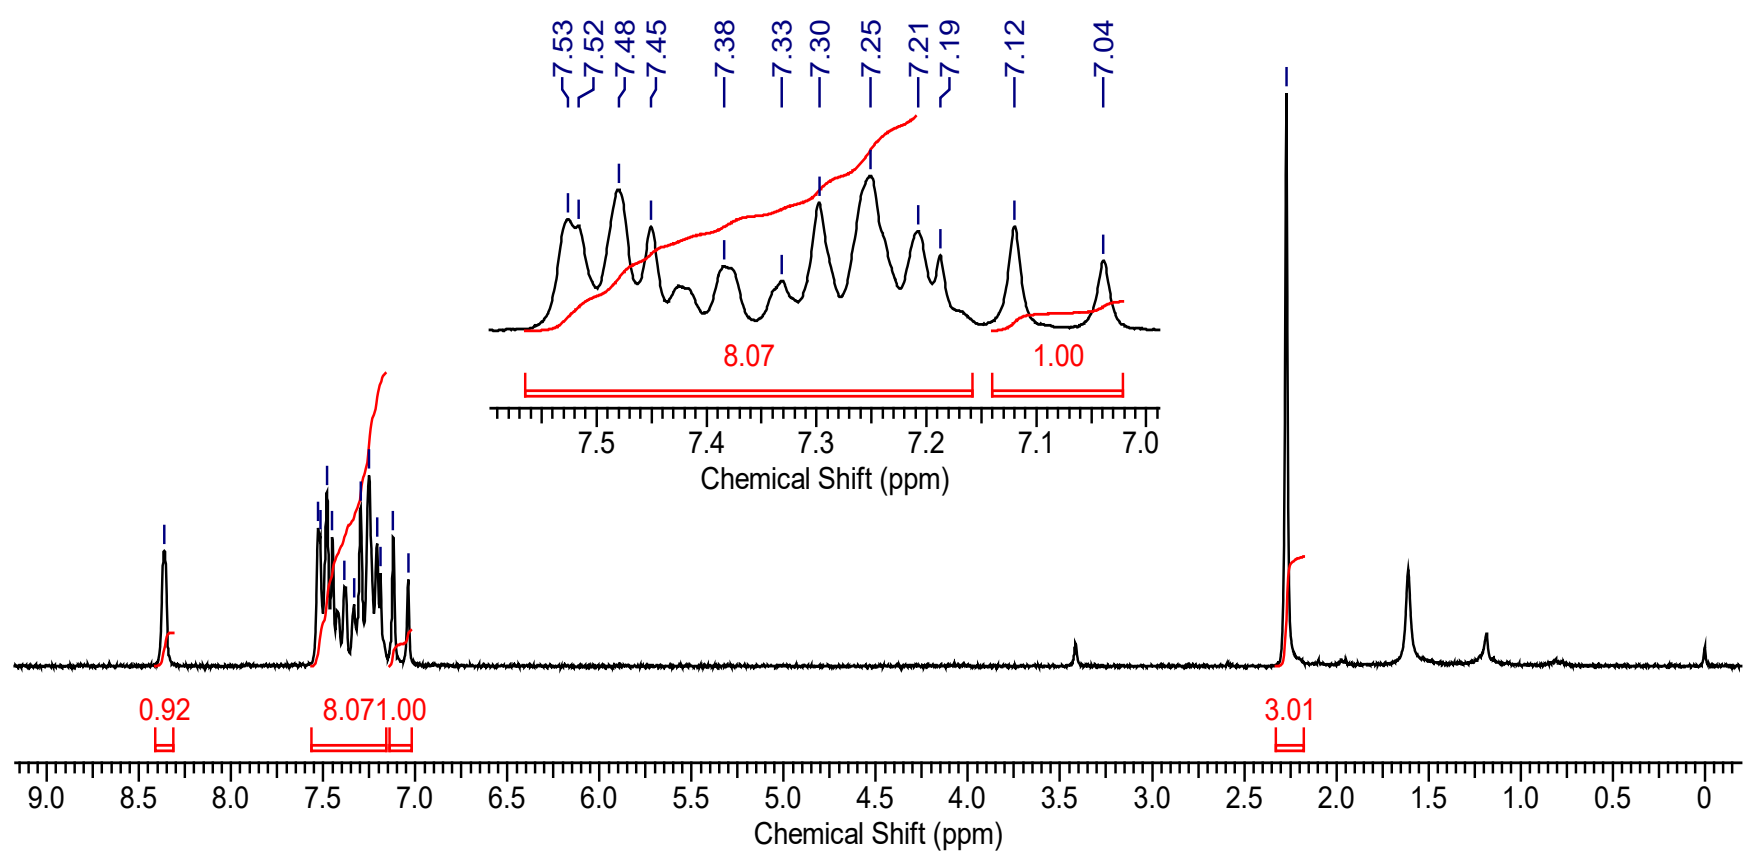

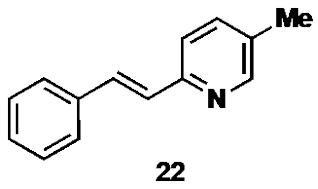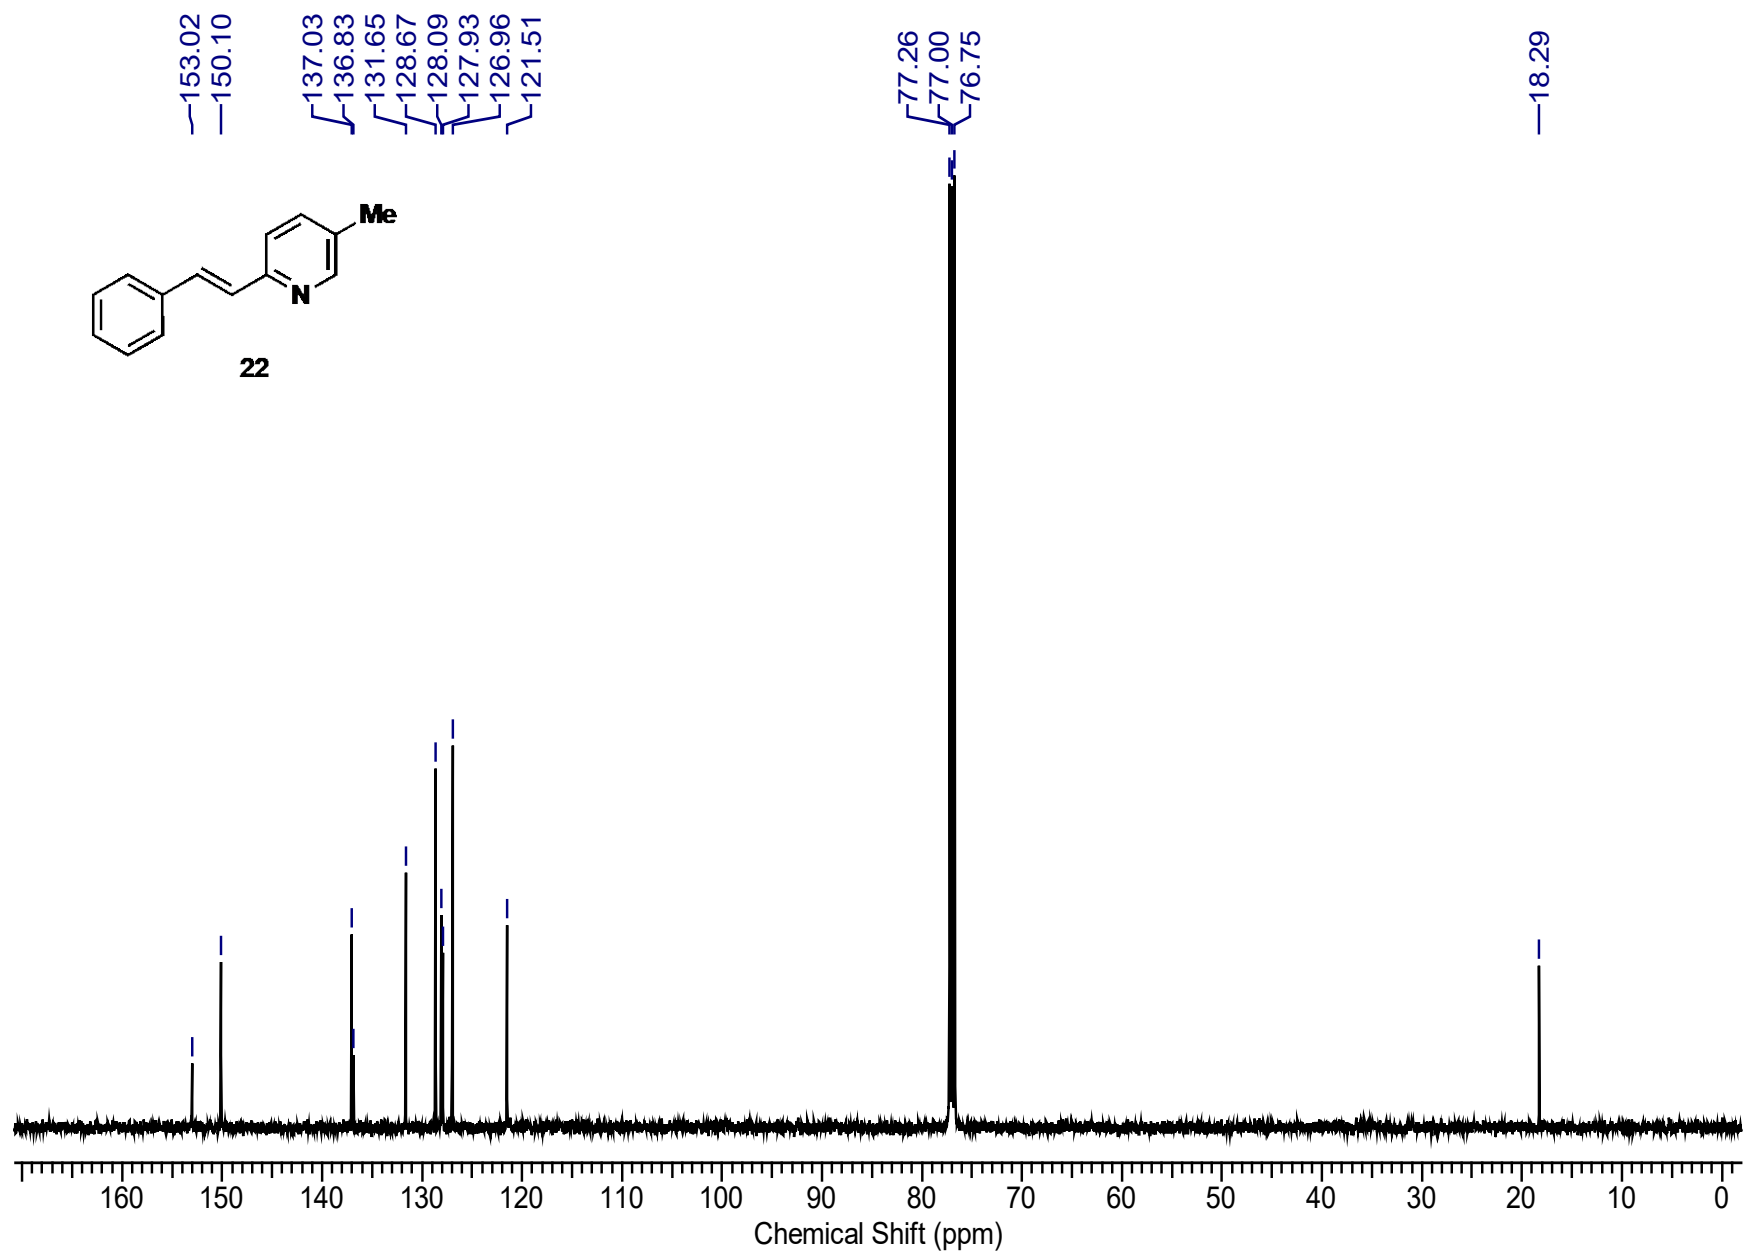

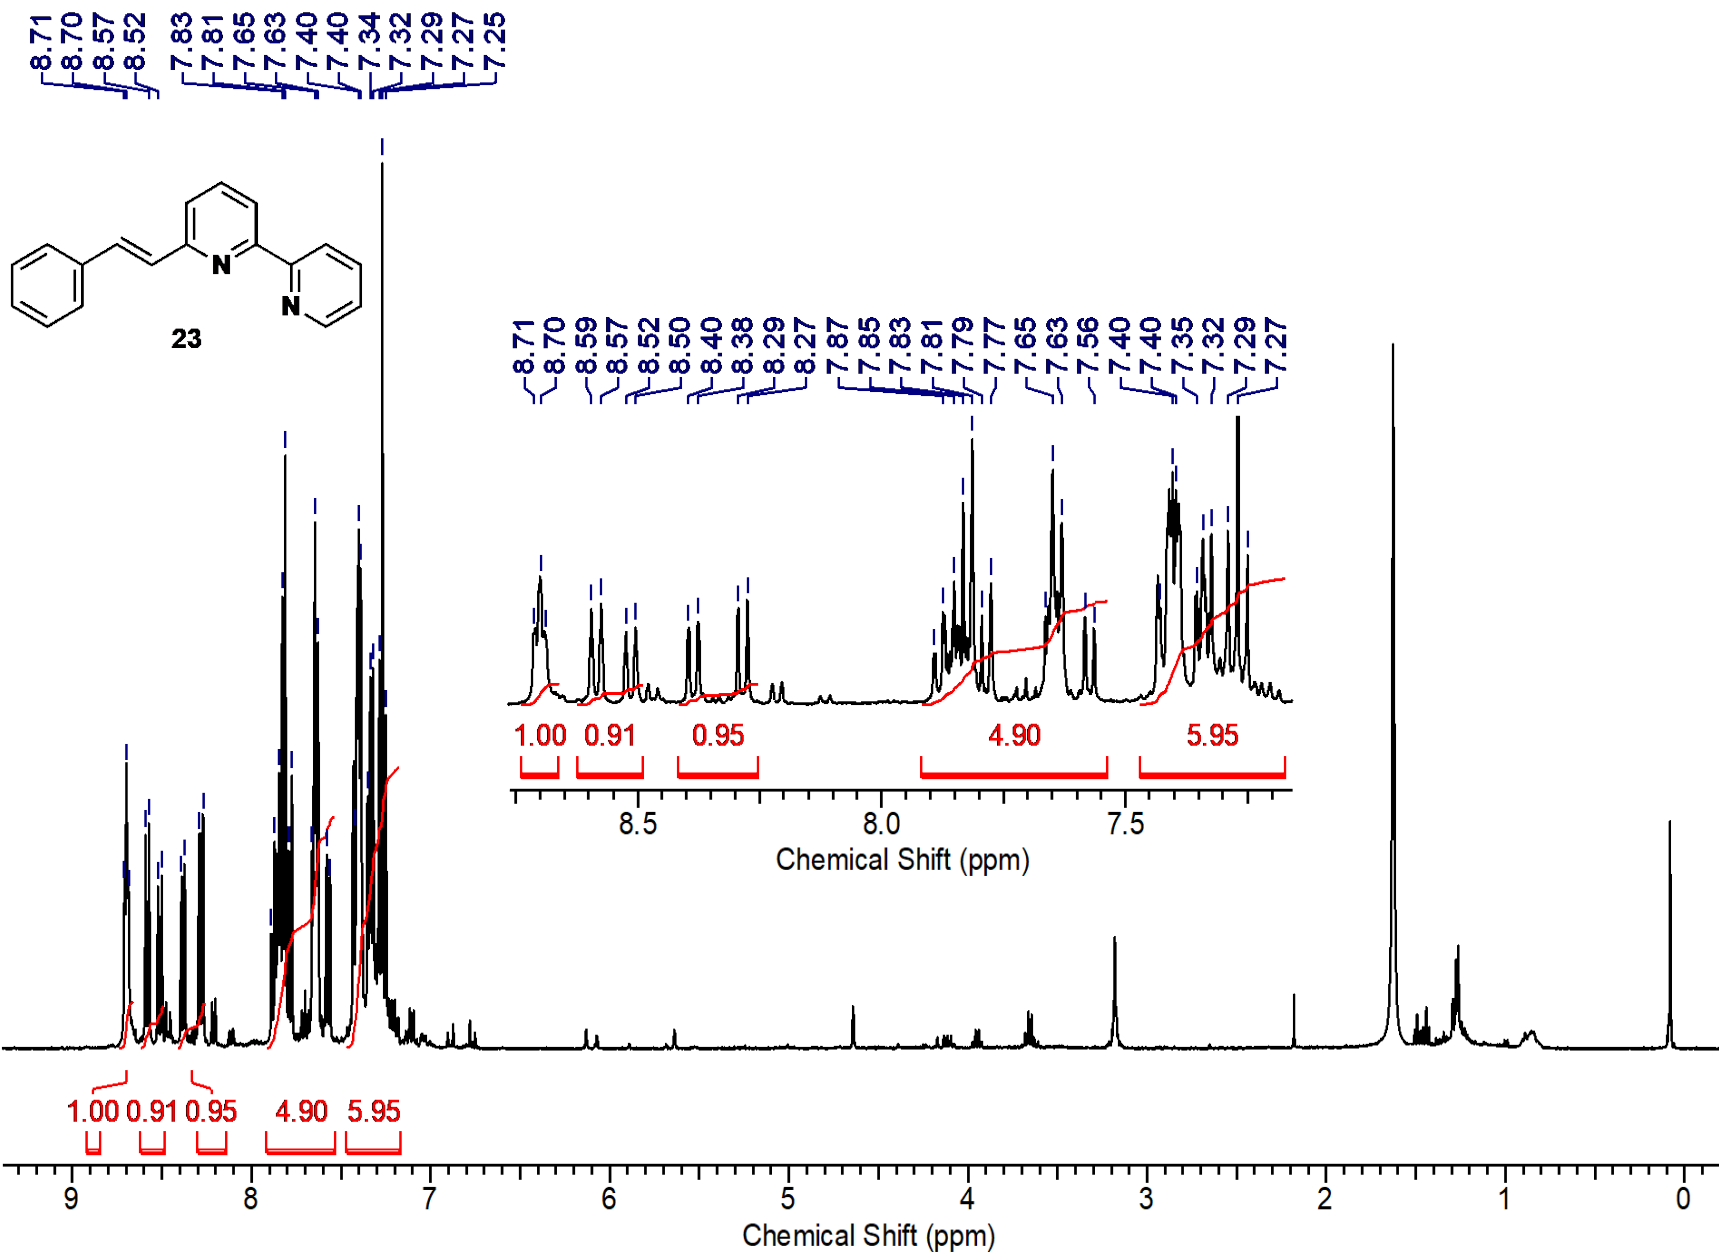

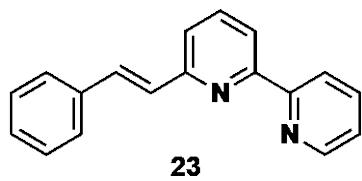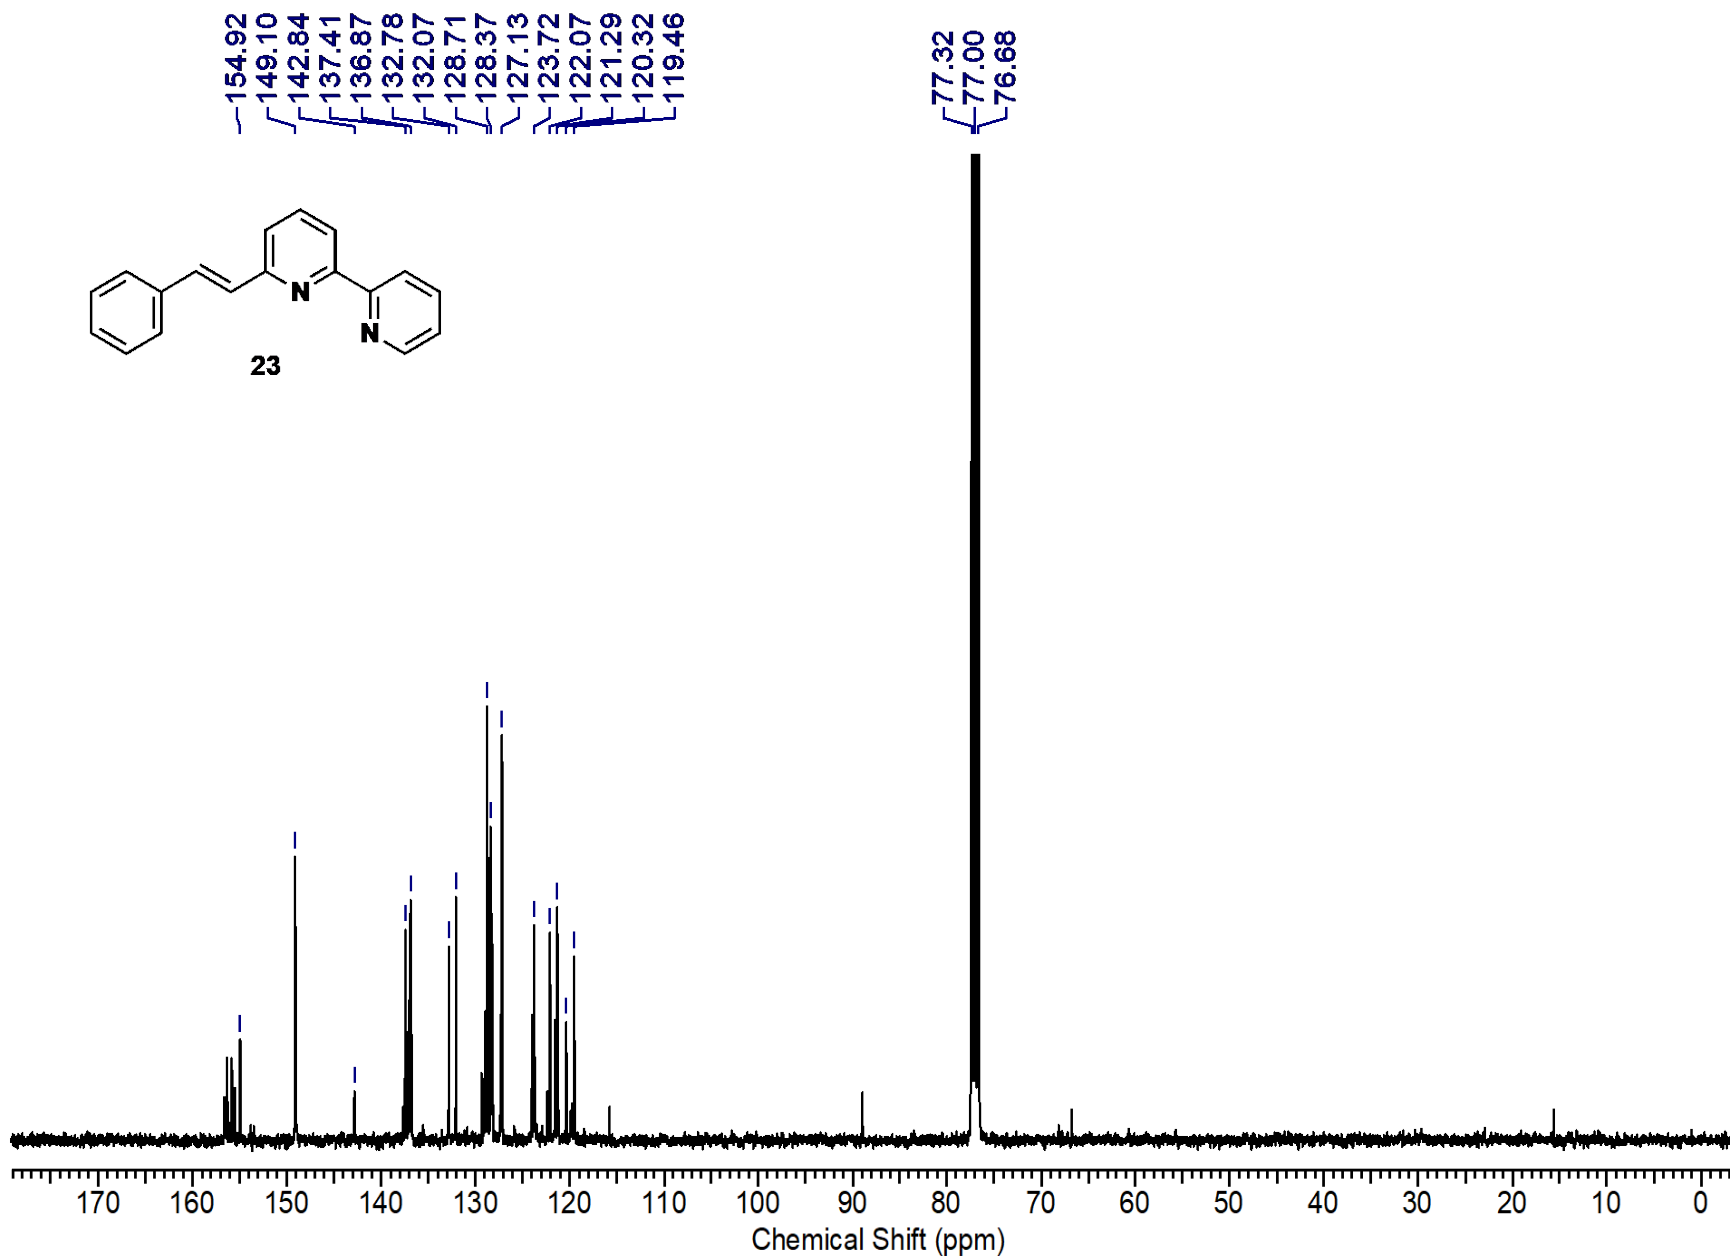

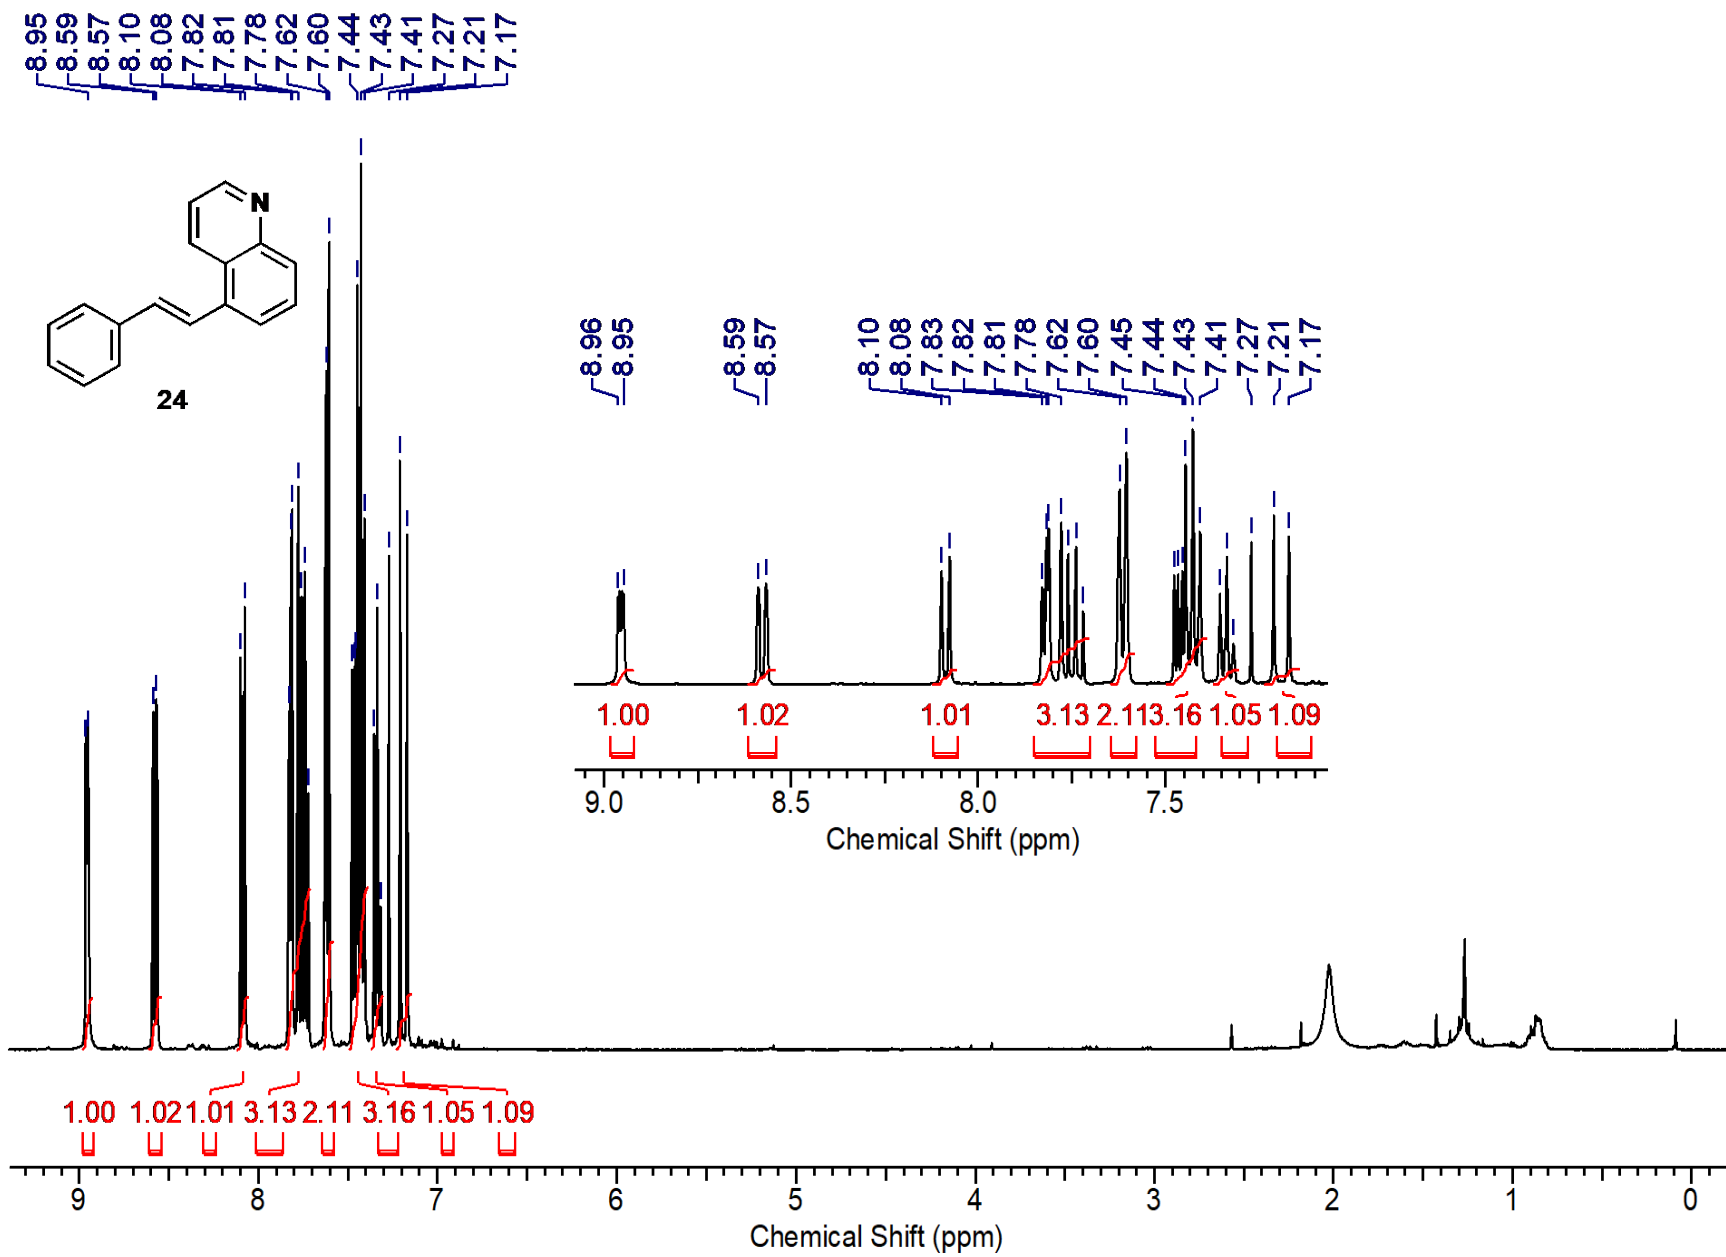

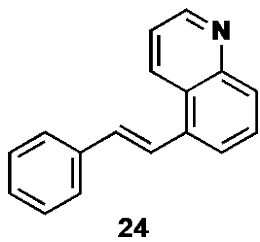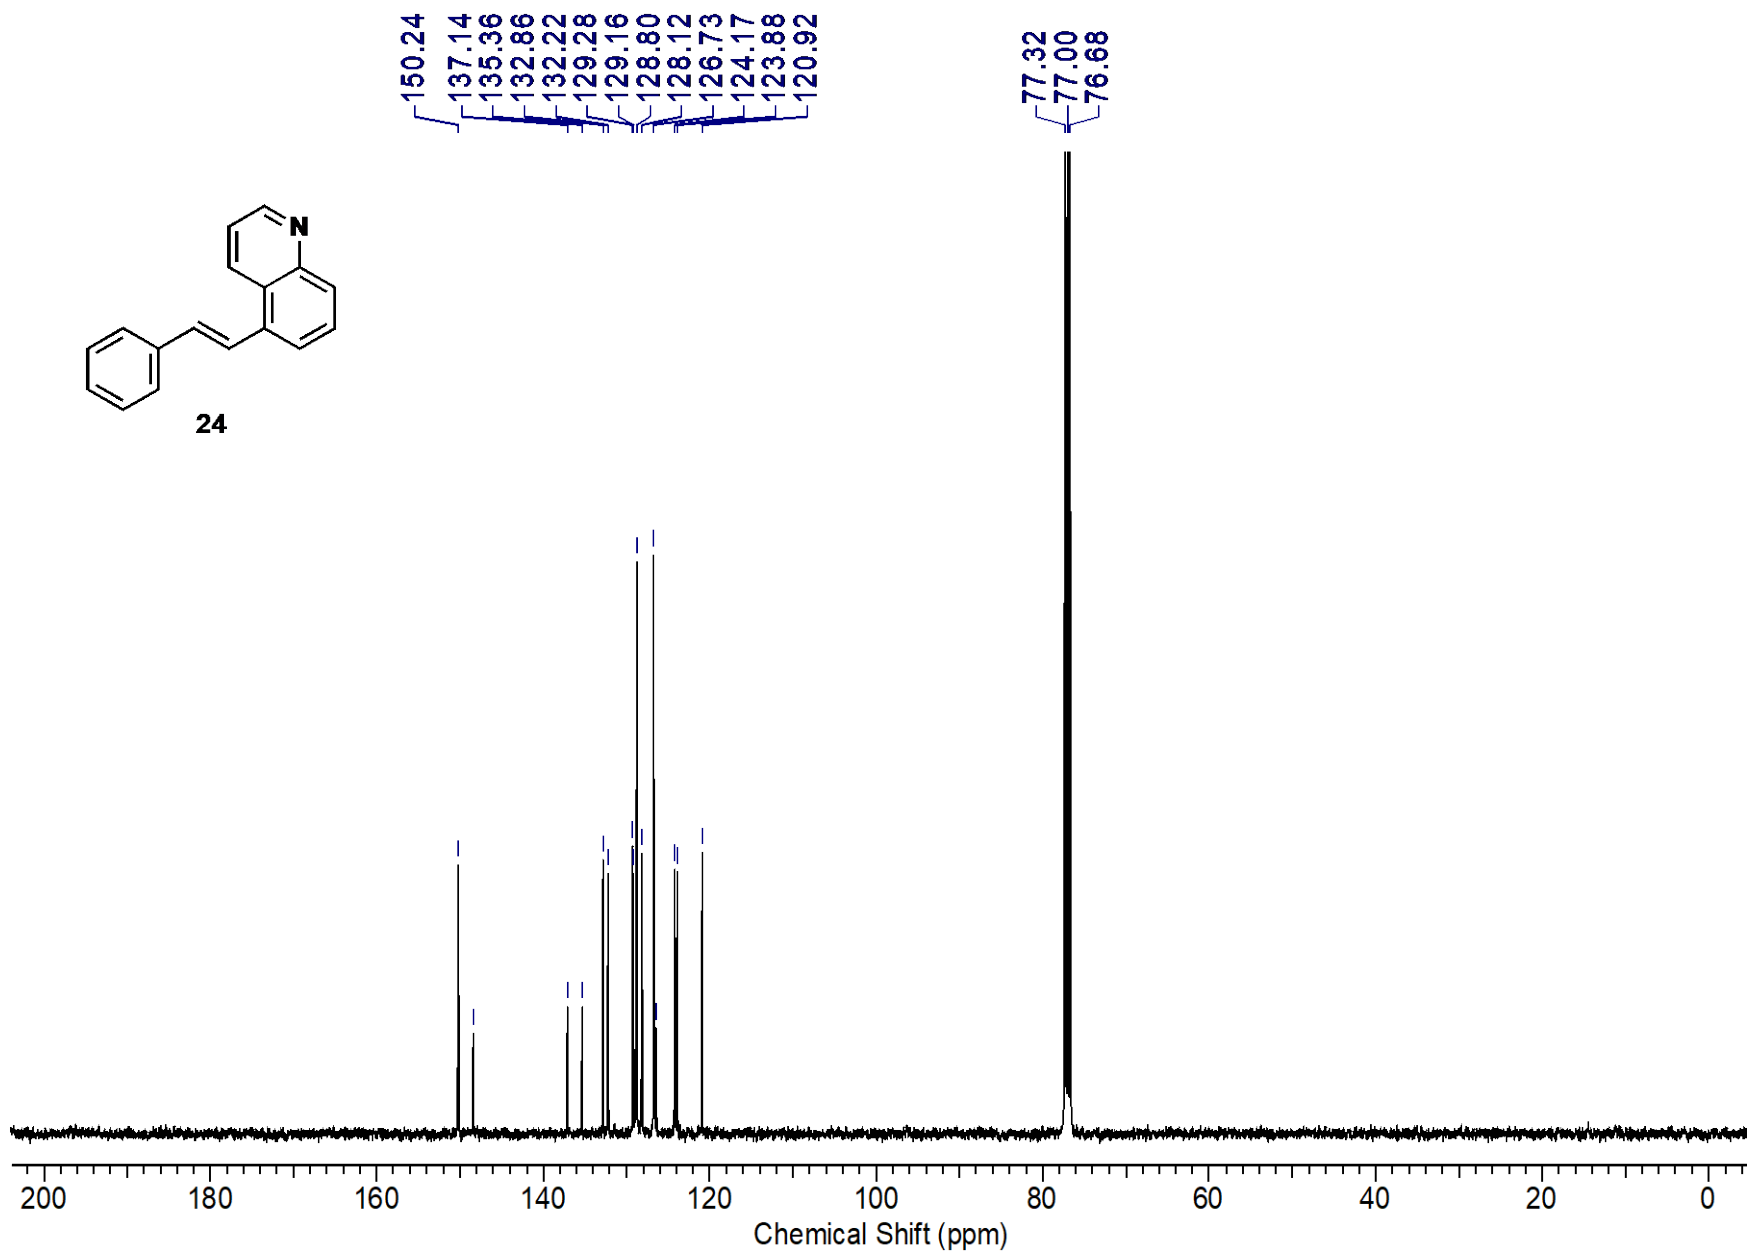



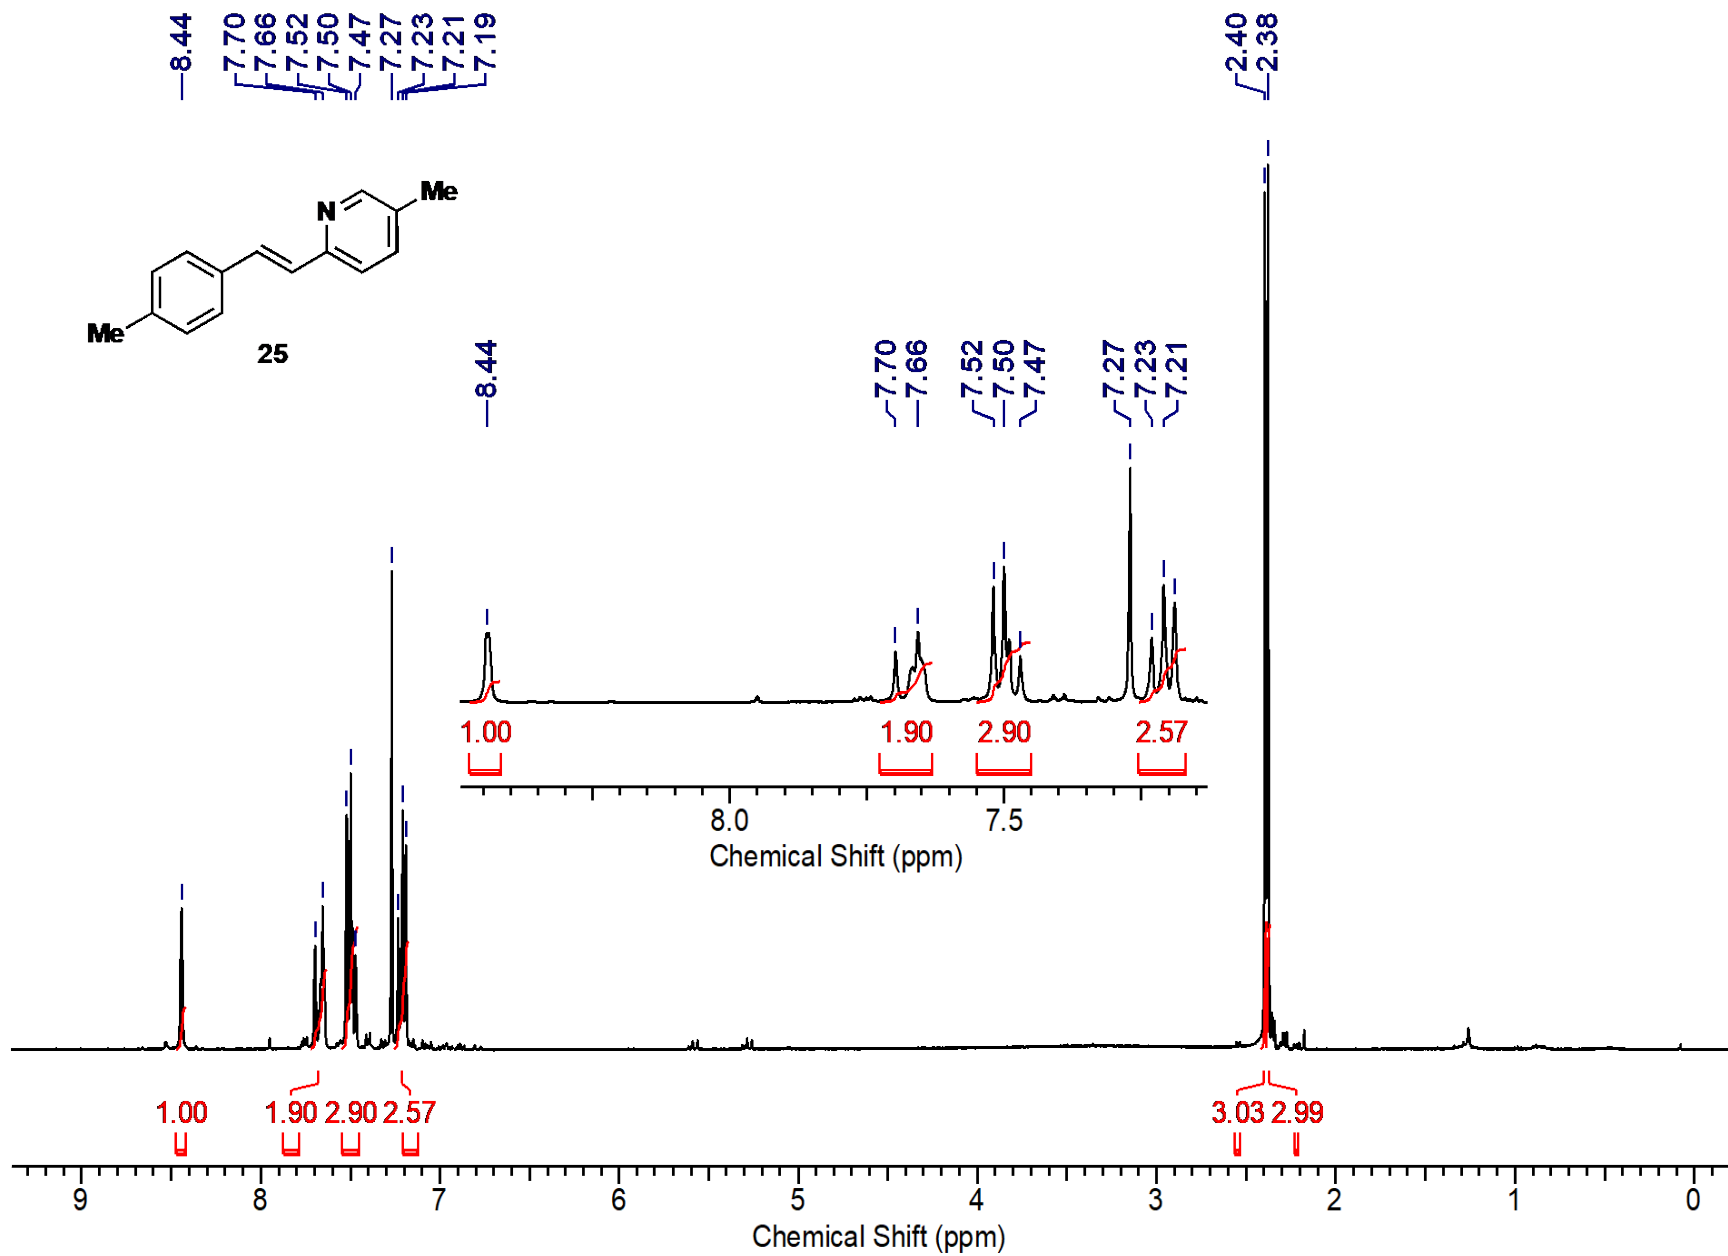

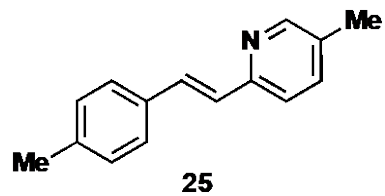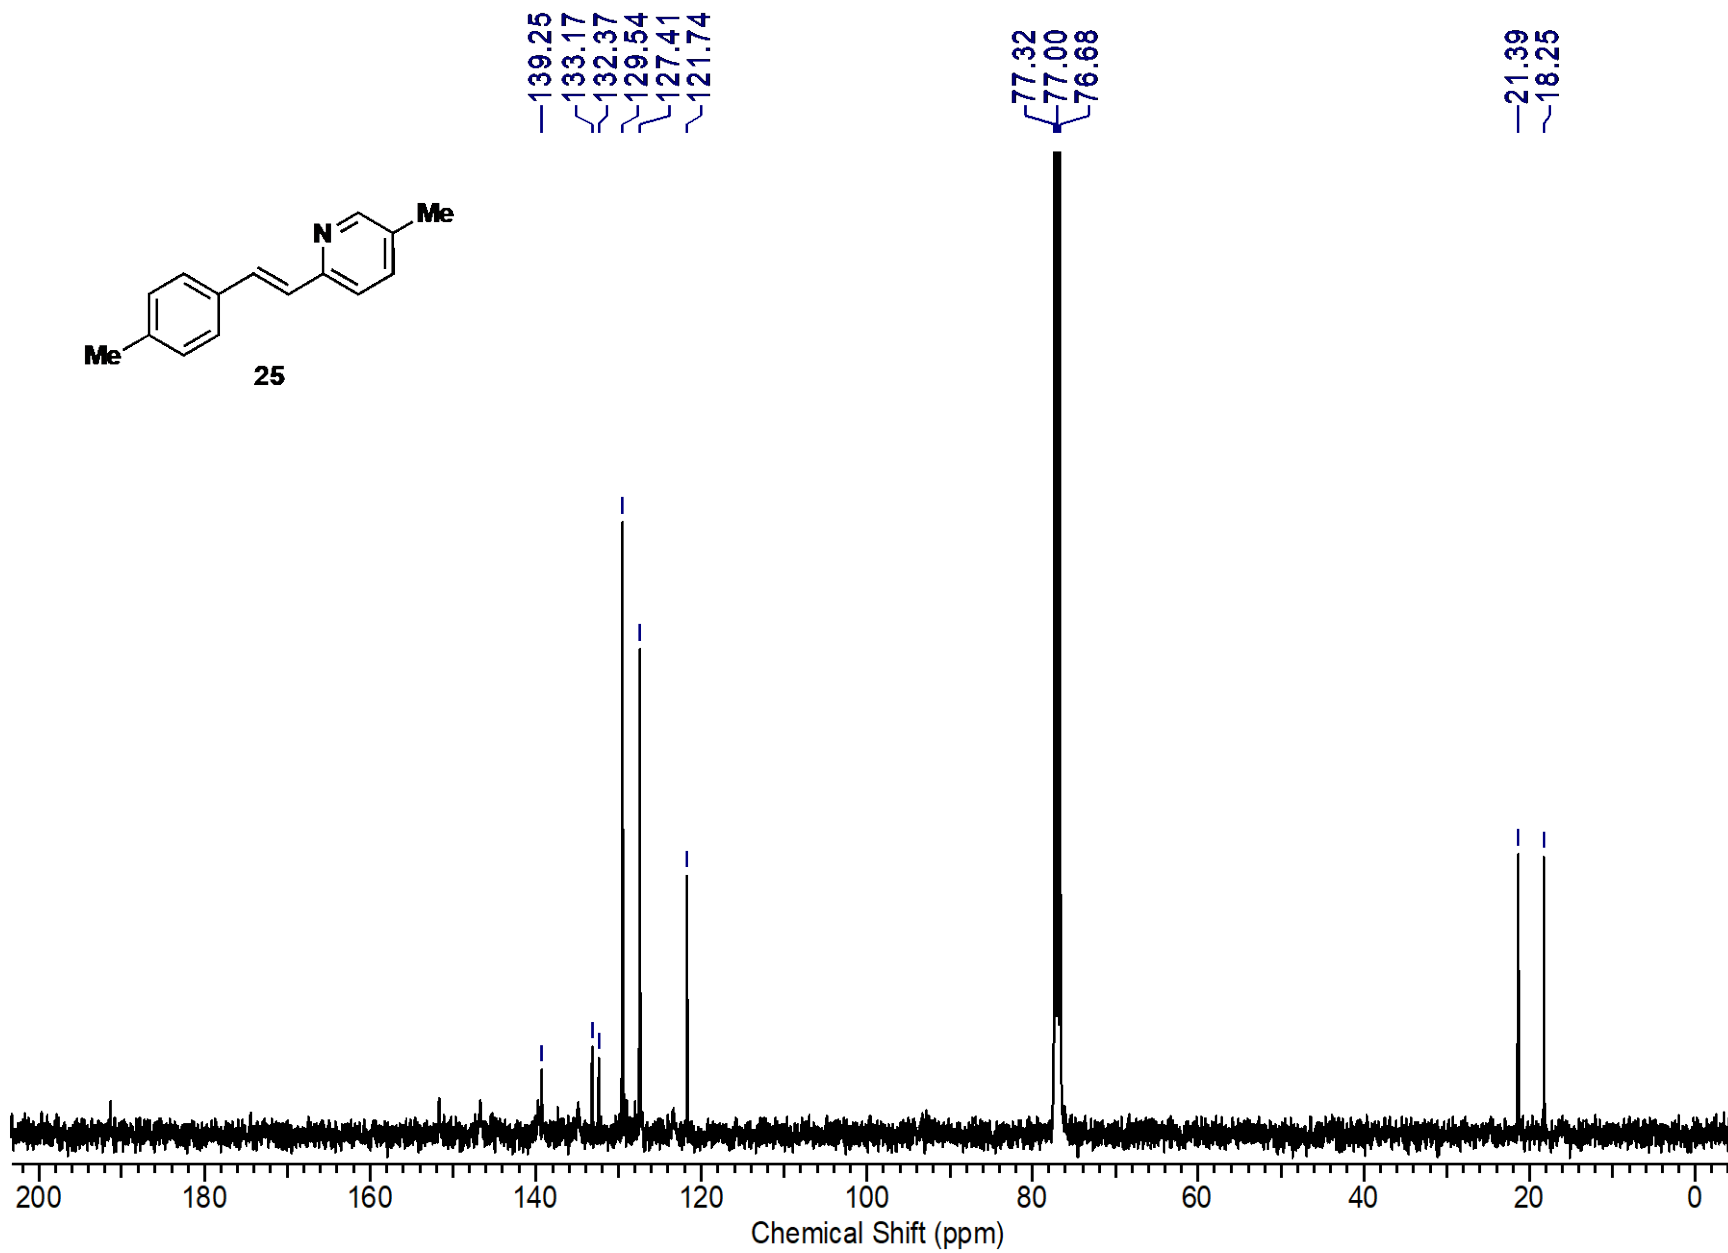

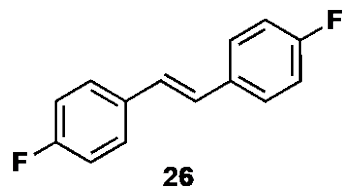

7.51  
7.48  
7.47  
7.44  
7.27  
7.11  
7.06  
7.02  
6.99

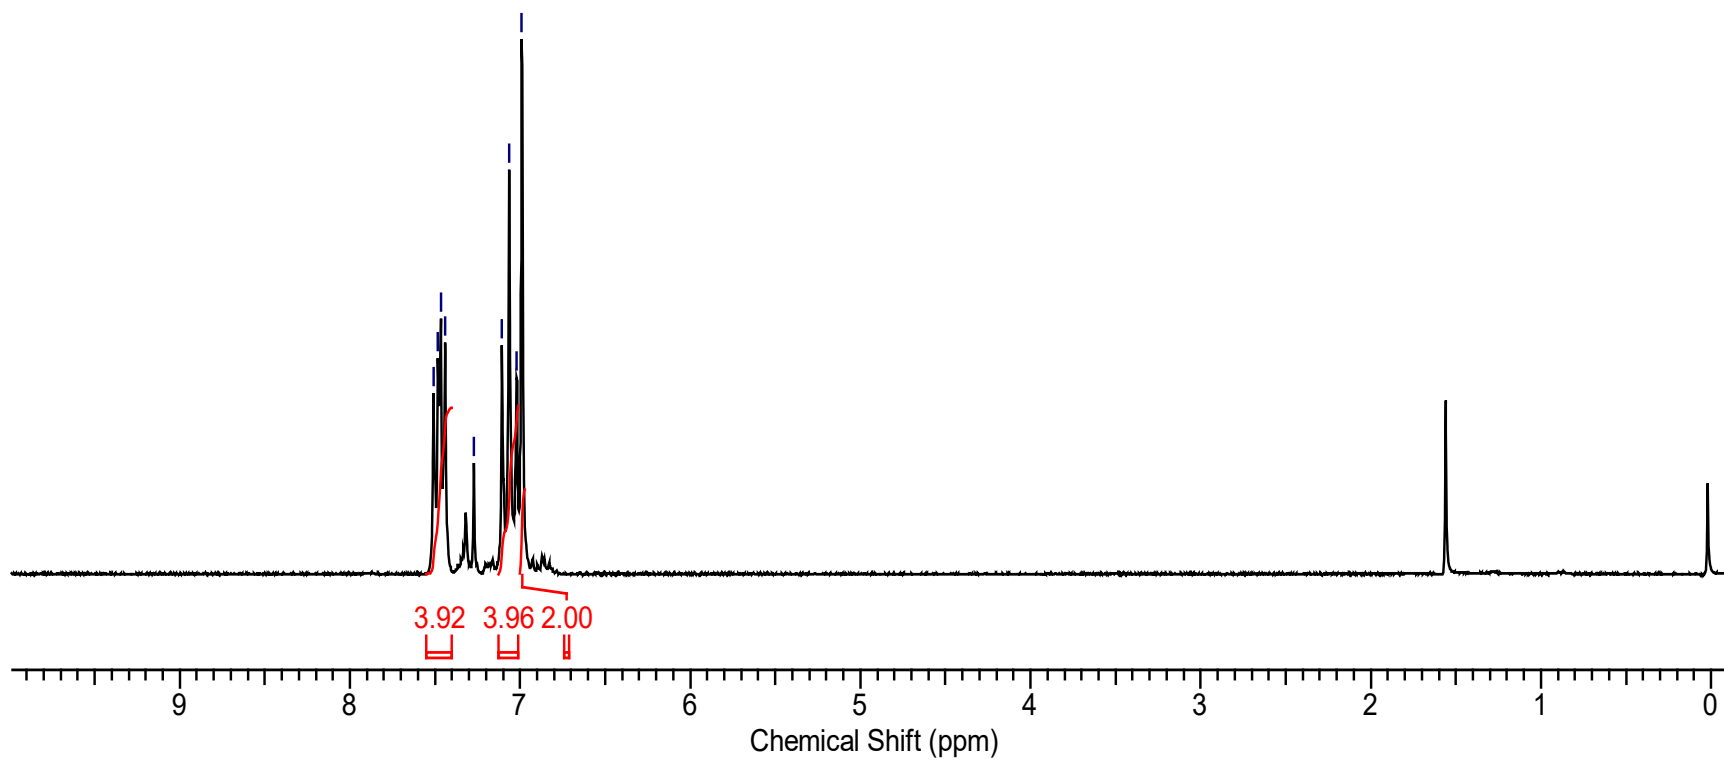

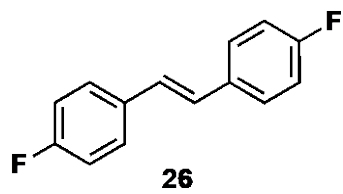

—164.80

—159.88

—133.38

—127.98

—127.82

—127.27

—115.85

—115.42

—77.00

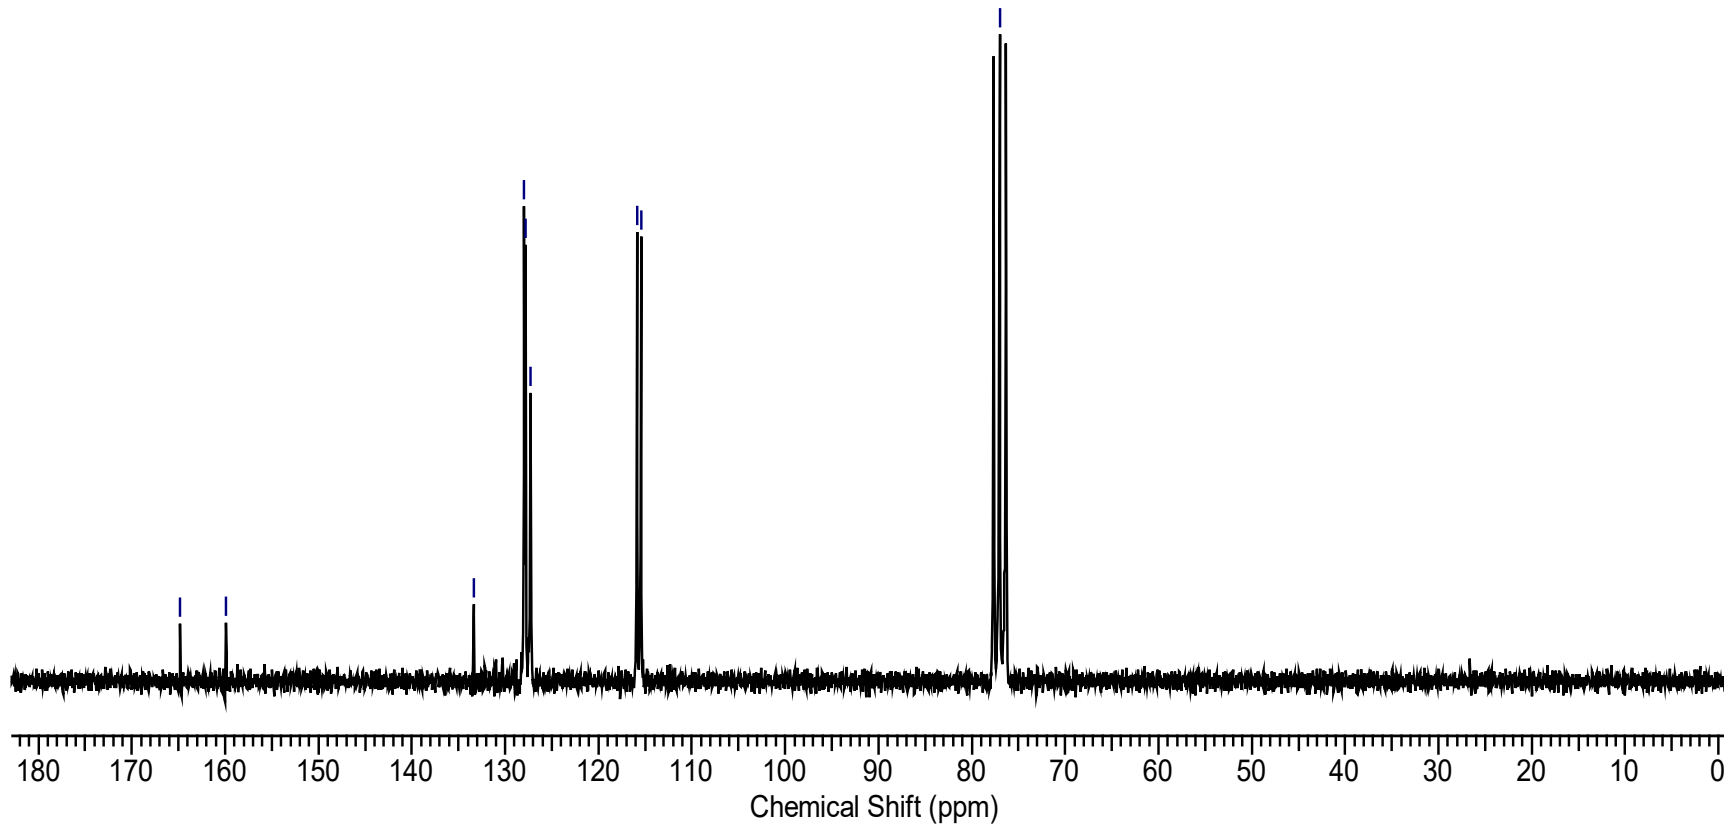

S100

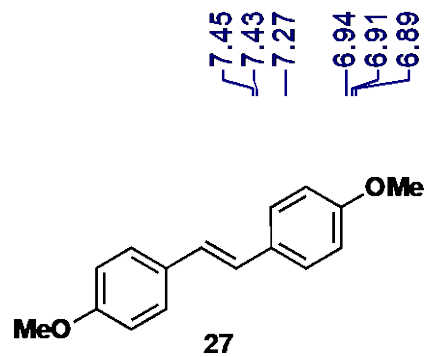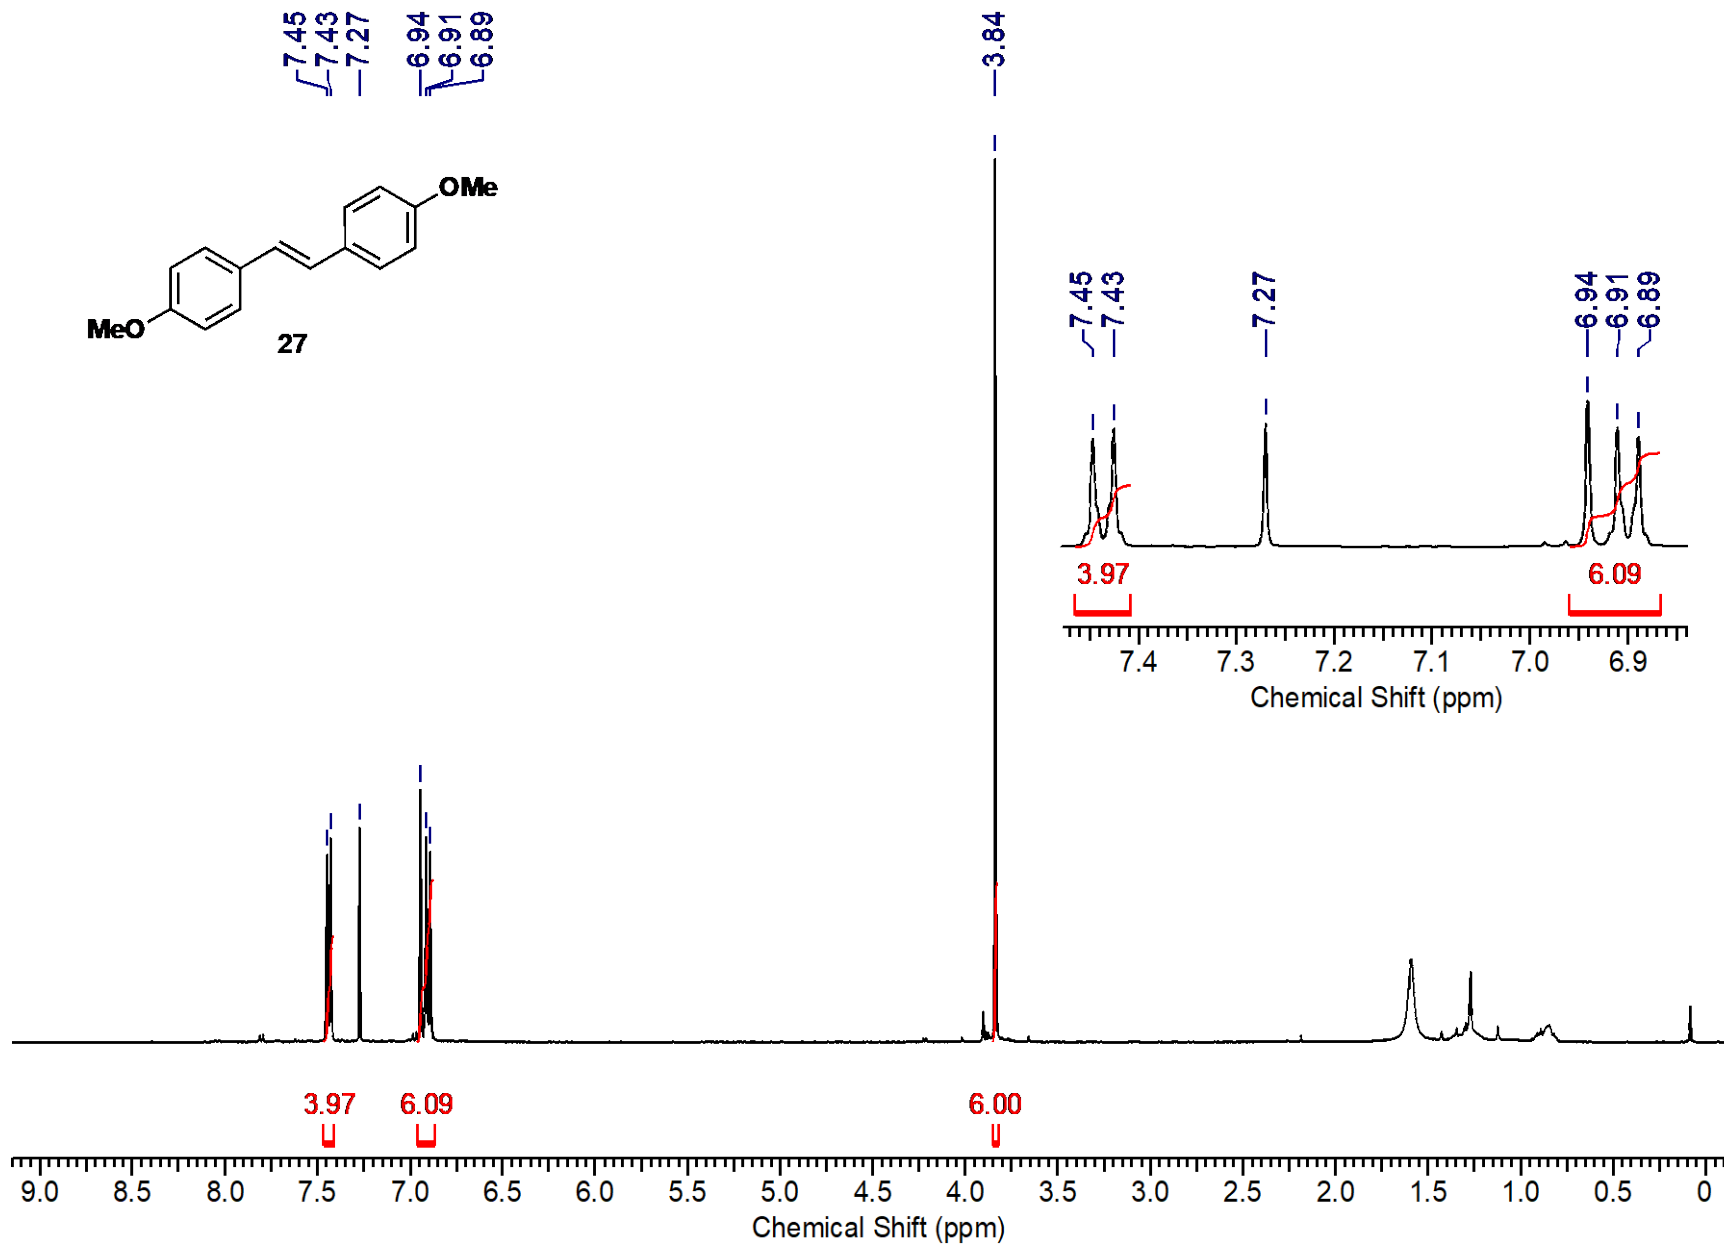

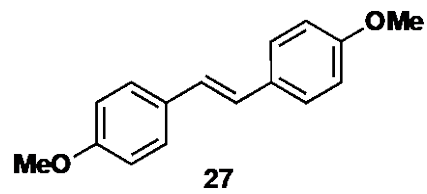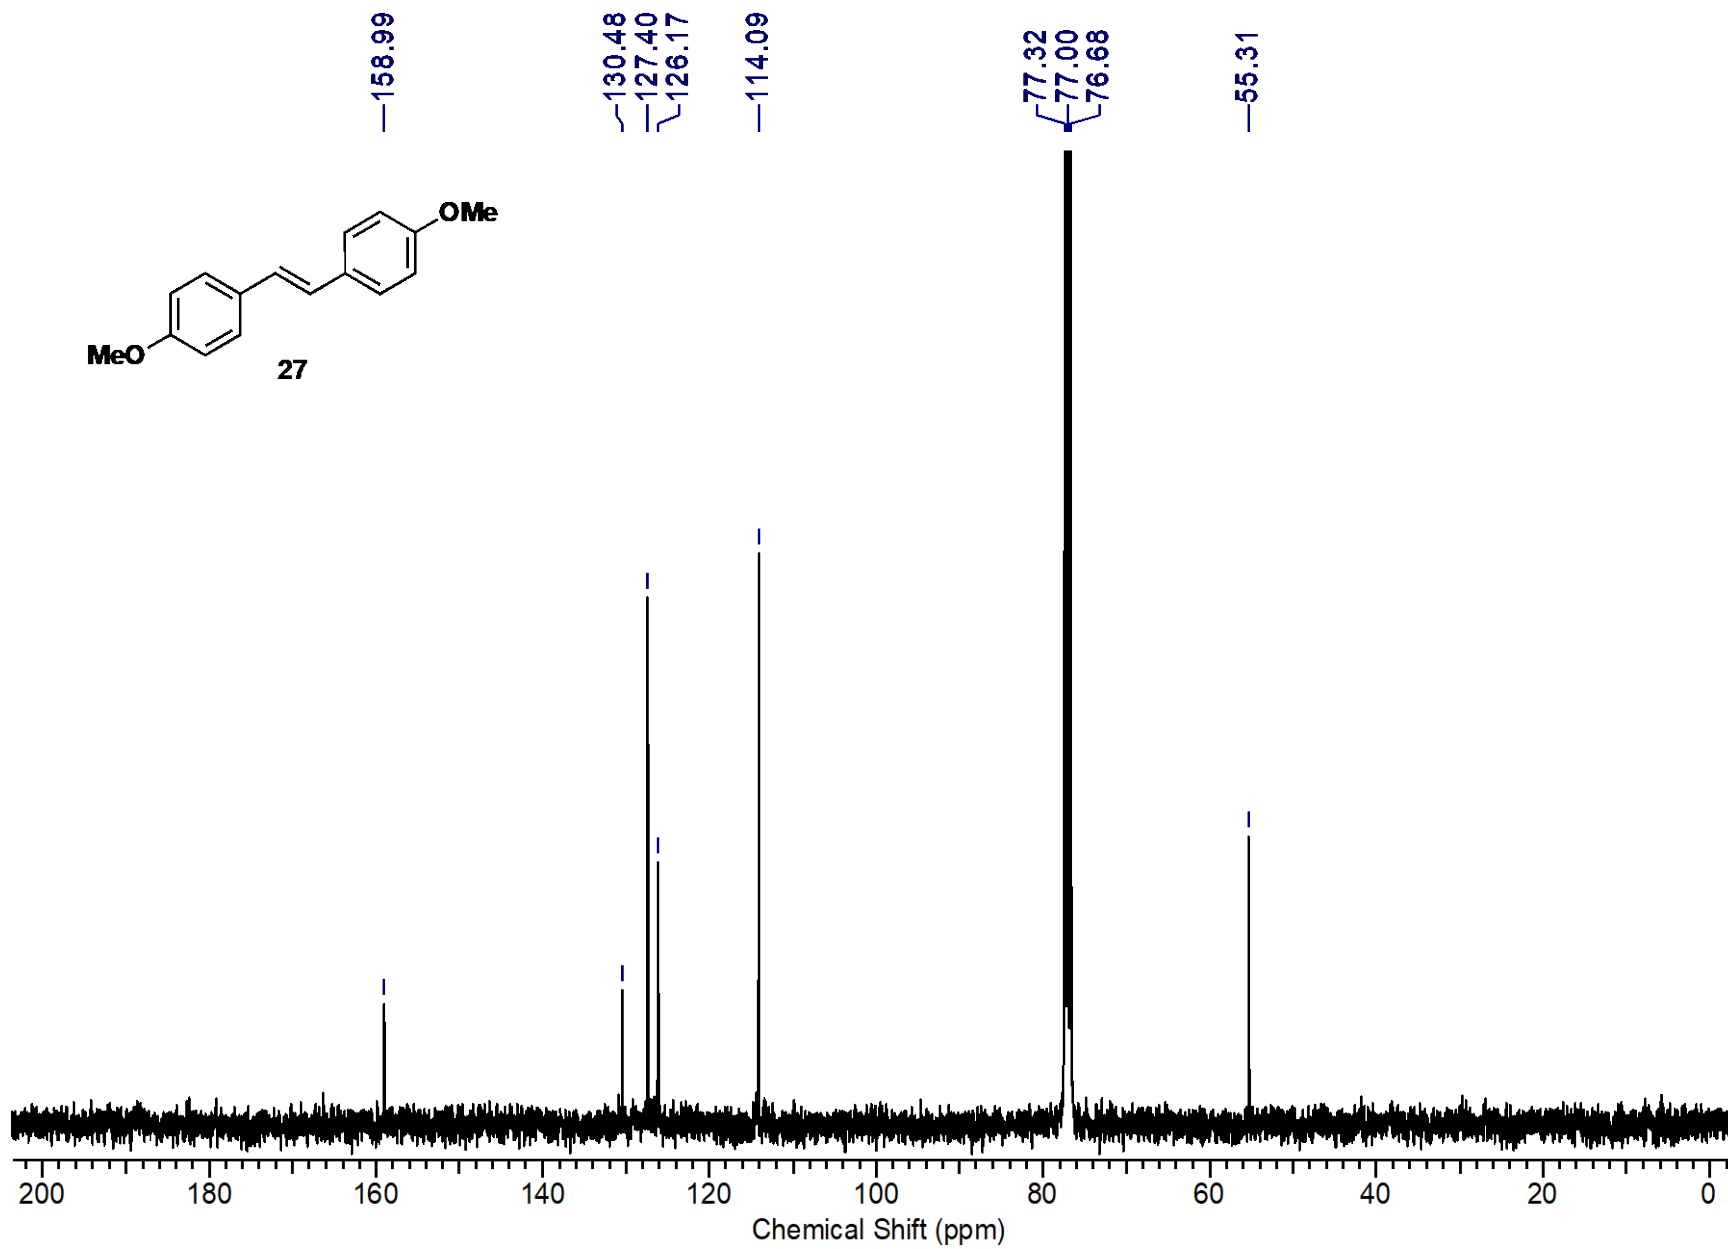

S102

7.48  
7.46  
7.44  
7.27  
7.07  
7.05  
7.03  
6.98  
6.96  
6.93

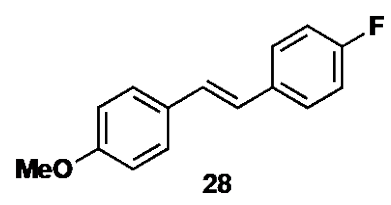

3.84

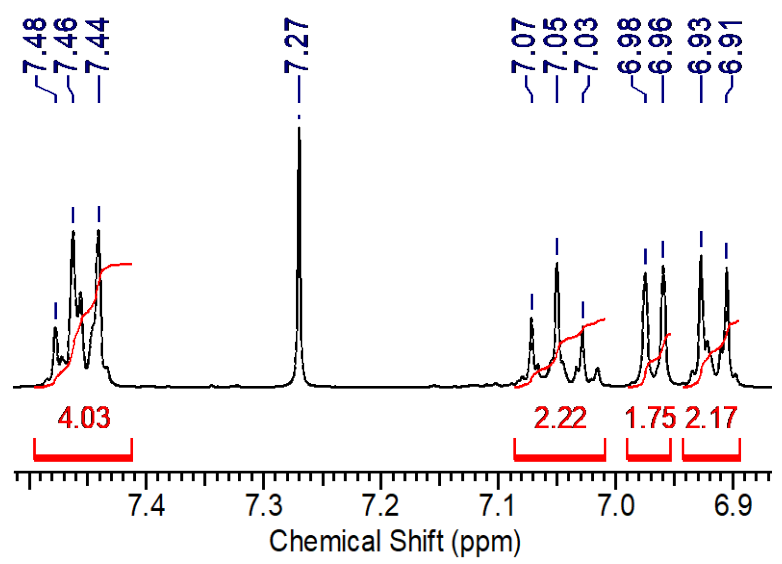

4.03  
2.22  
1.75  
2.17

3.00

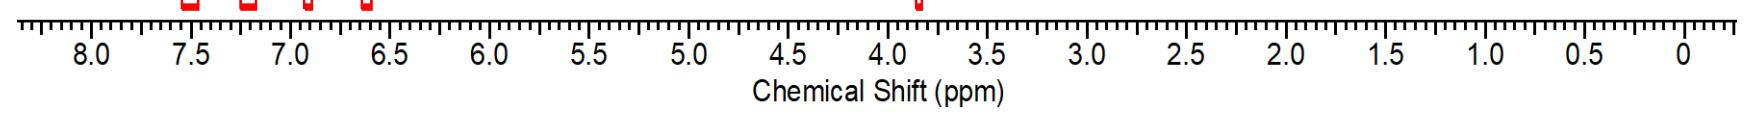

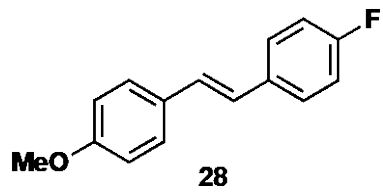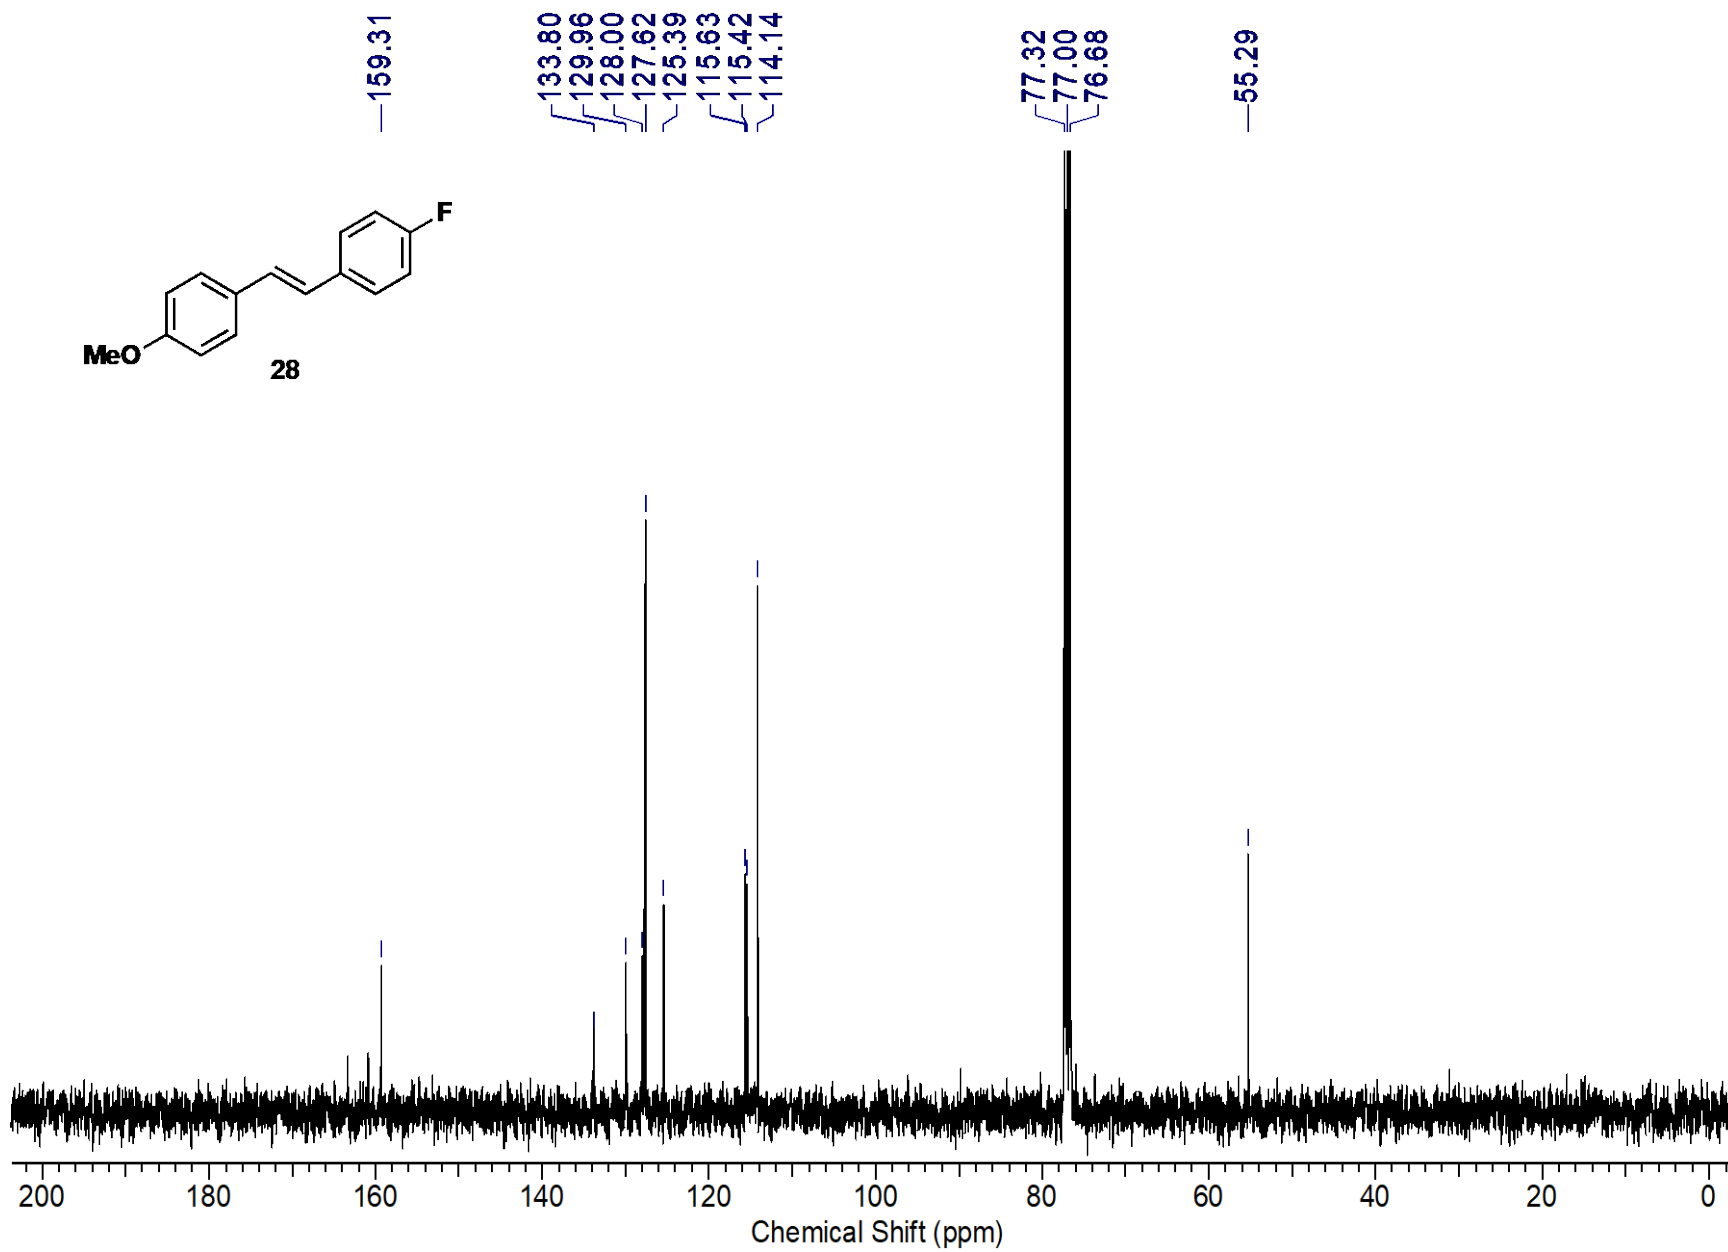

S104



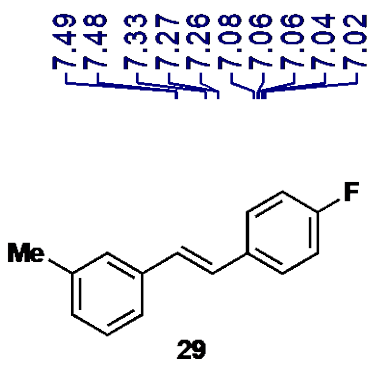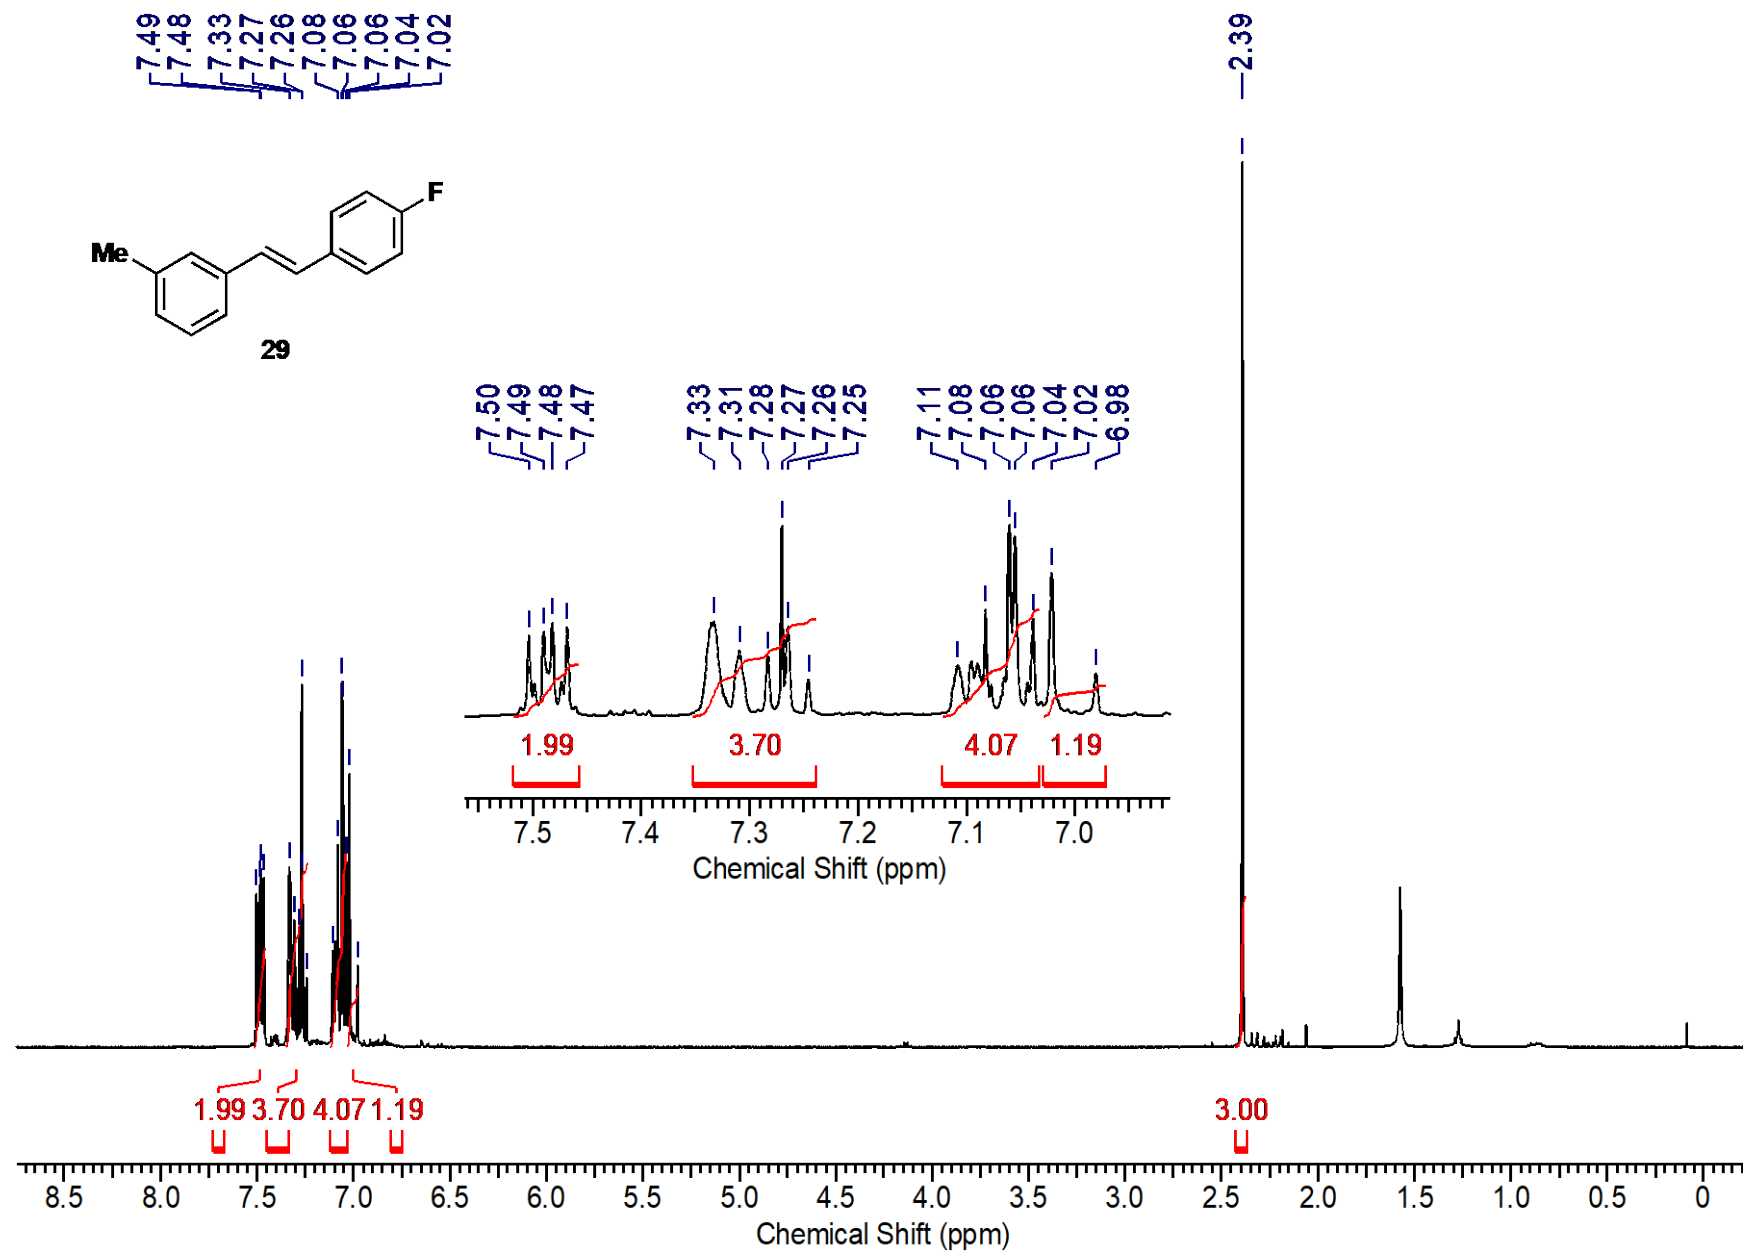

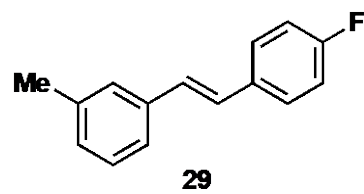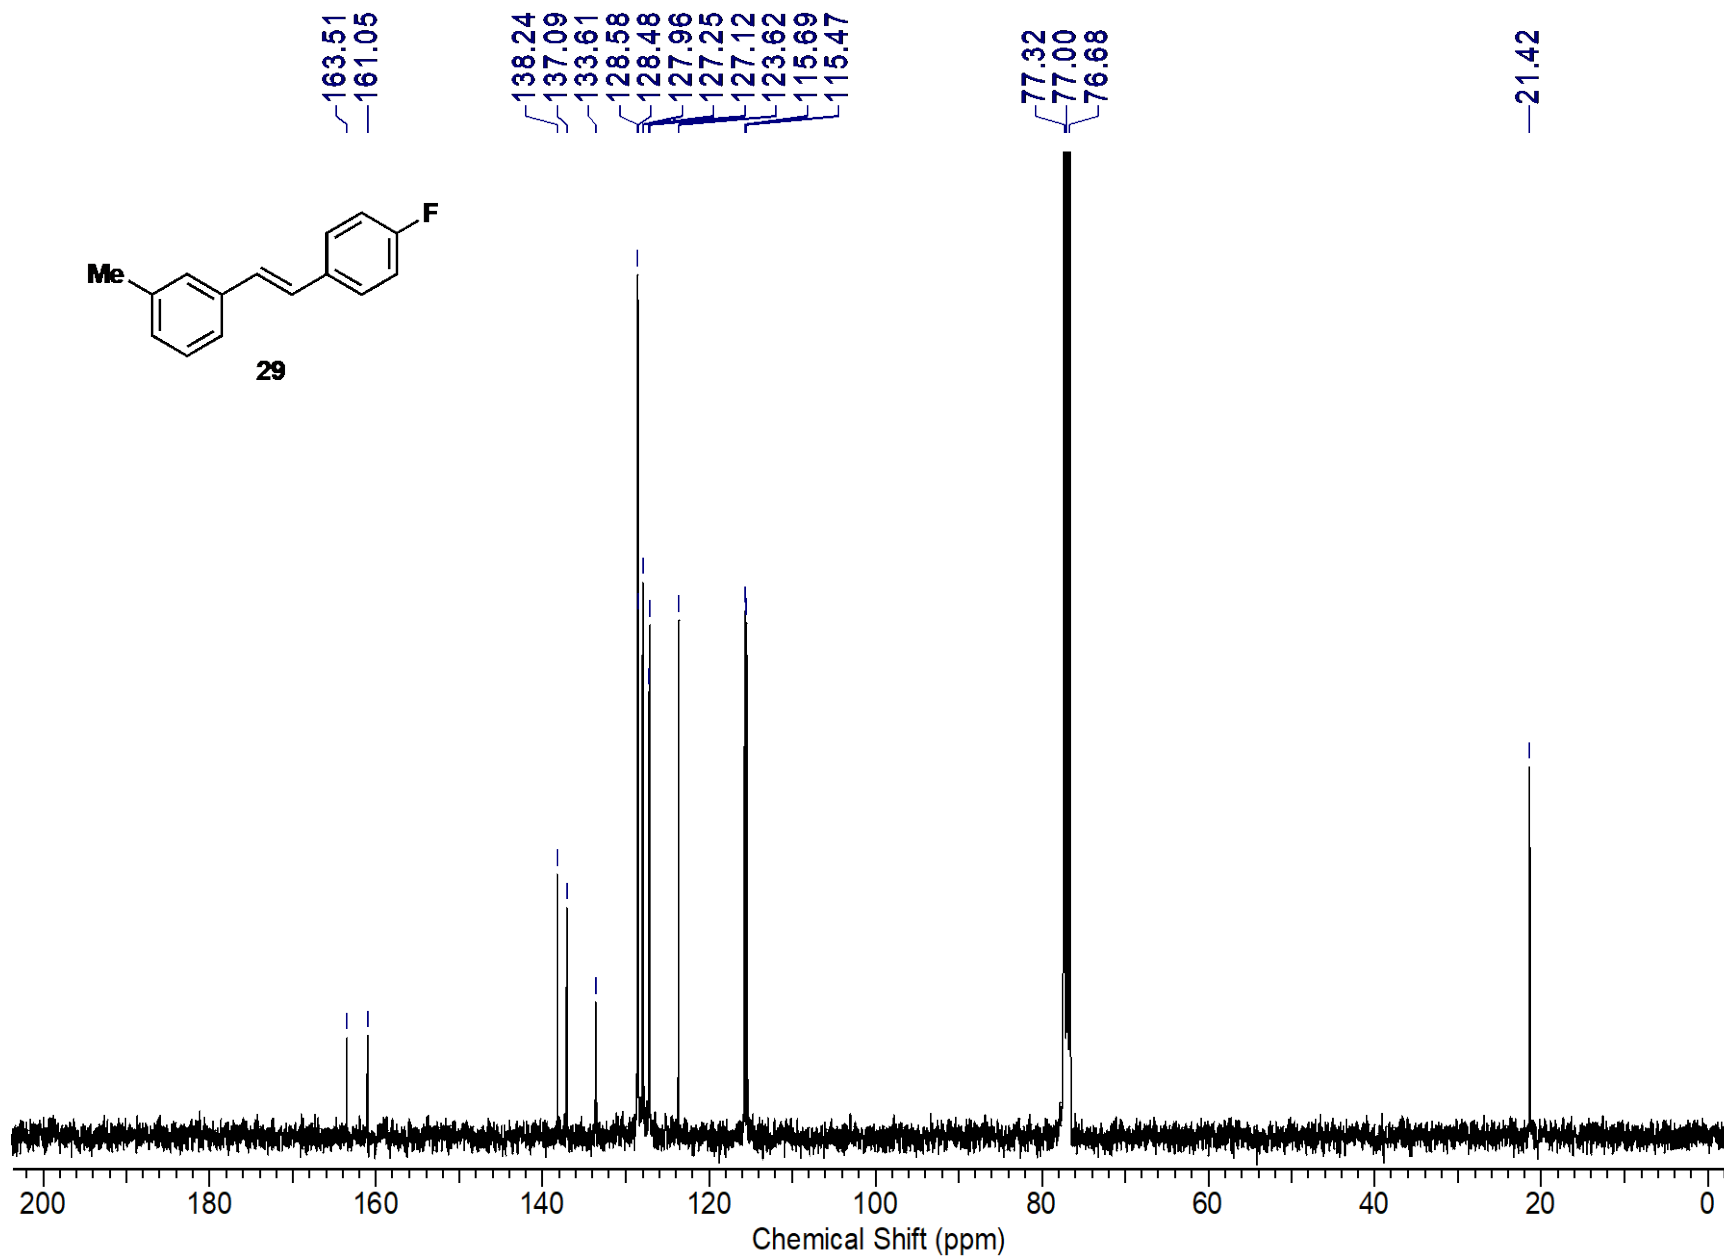

S106

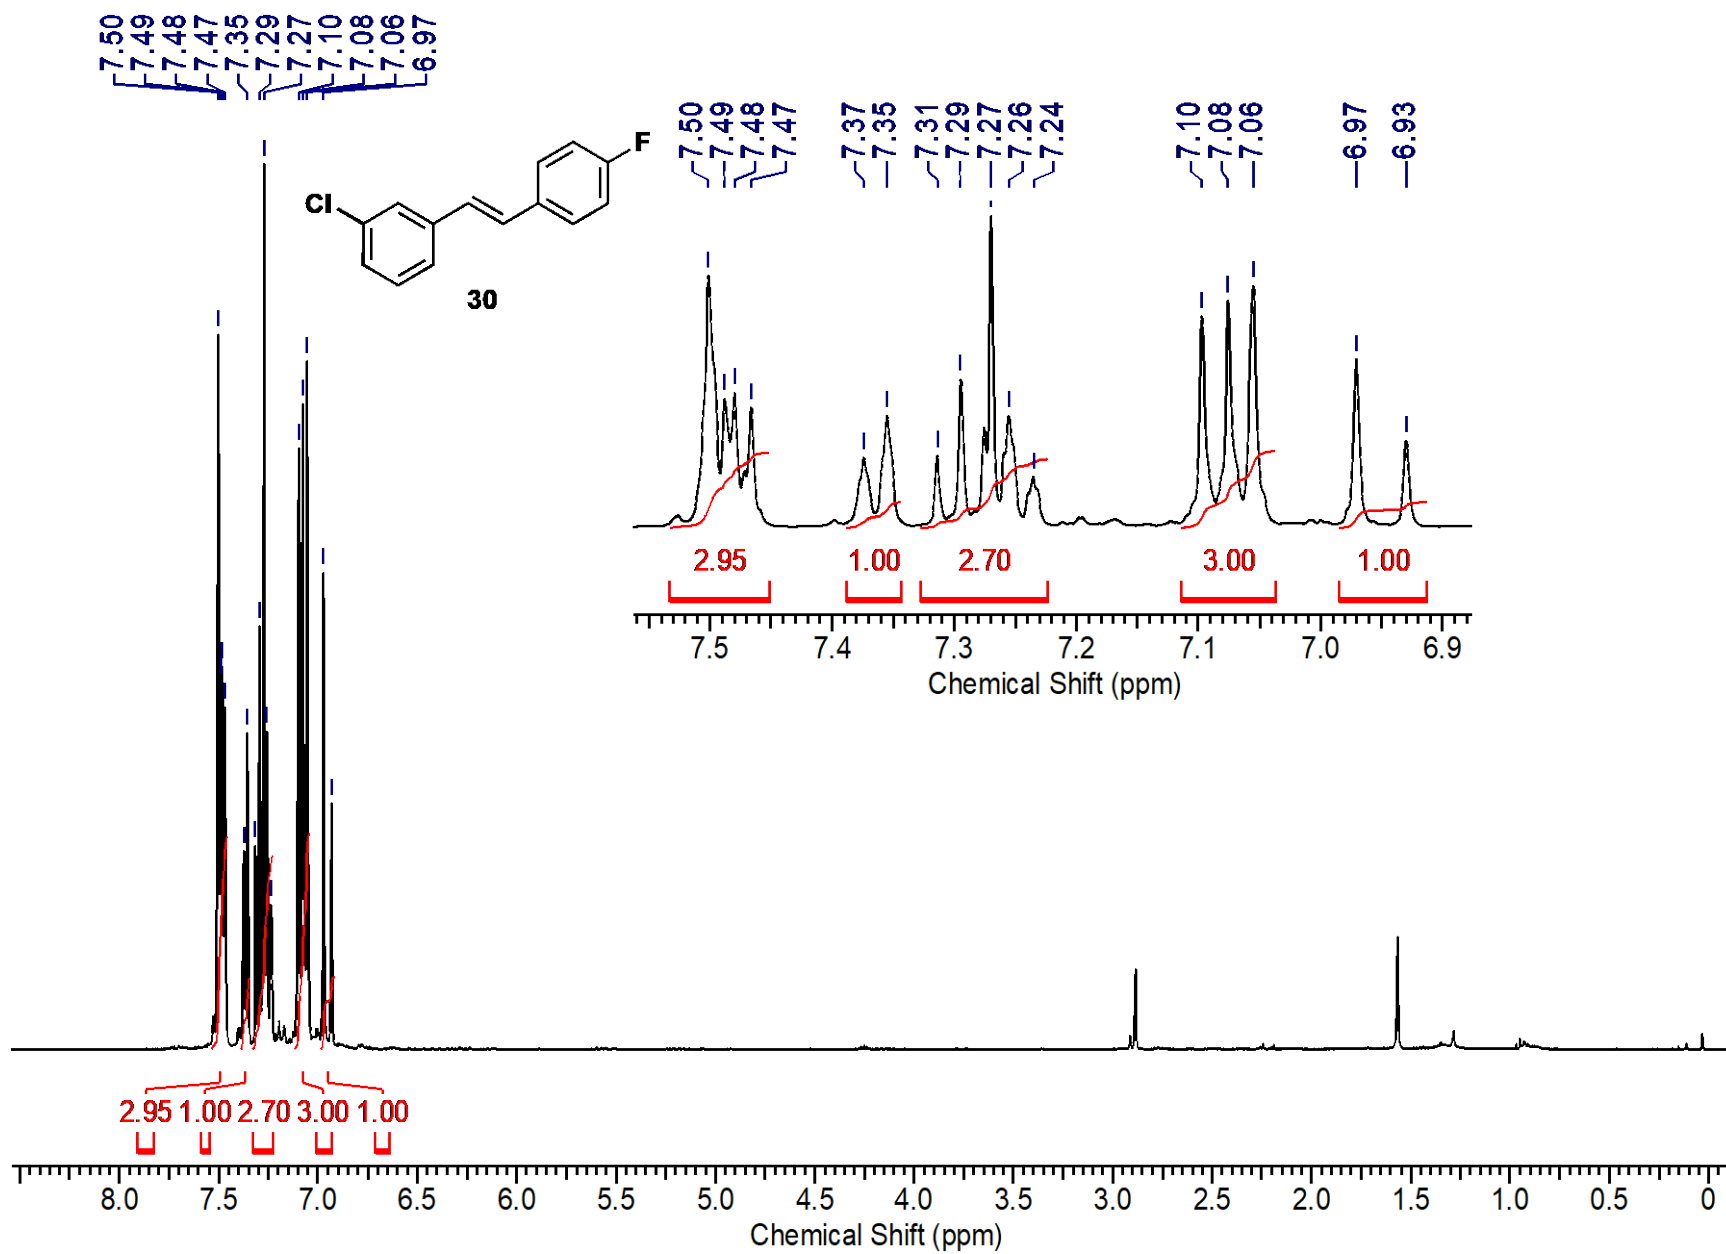

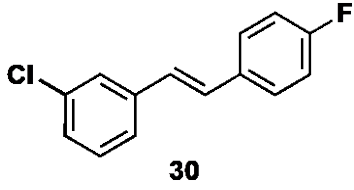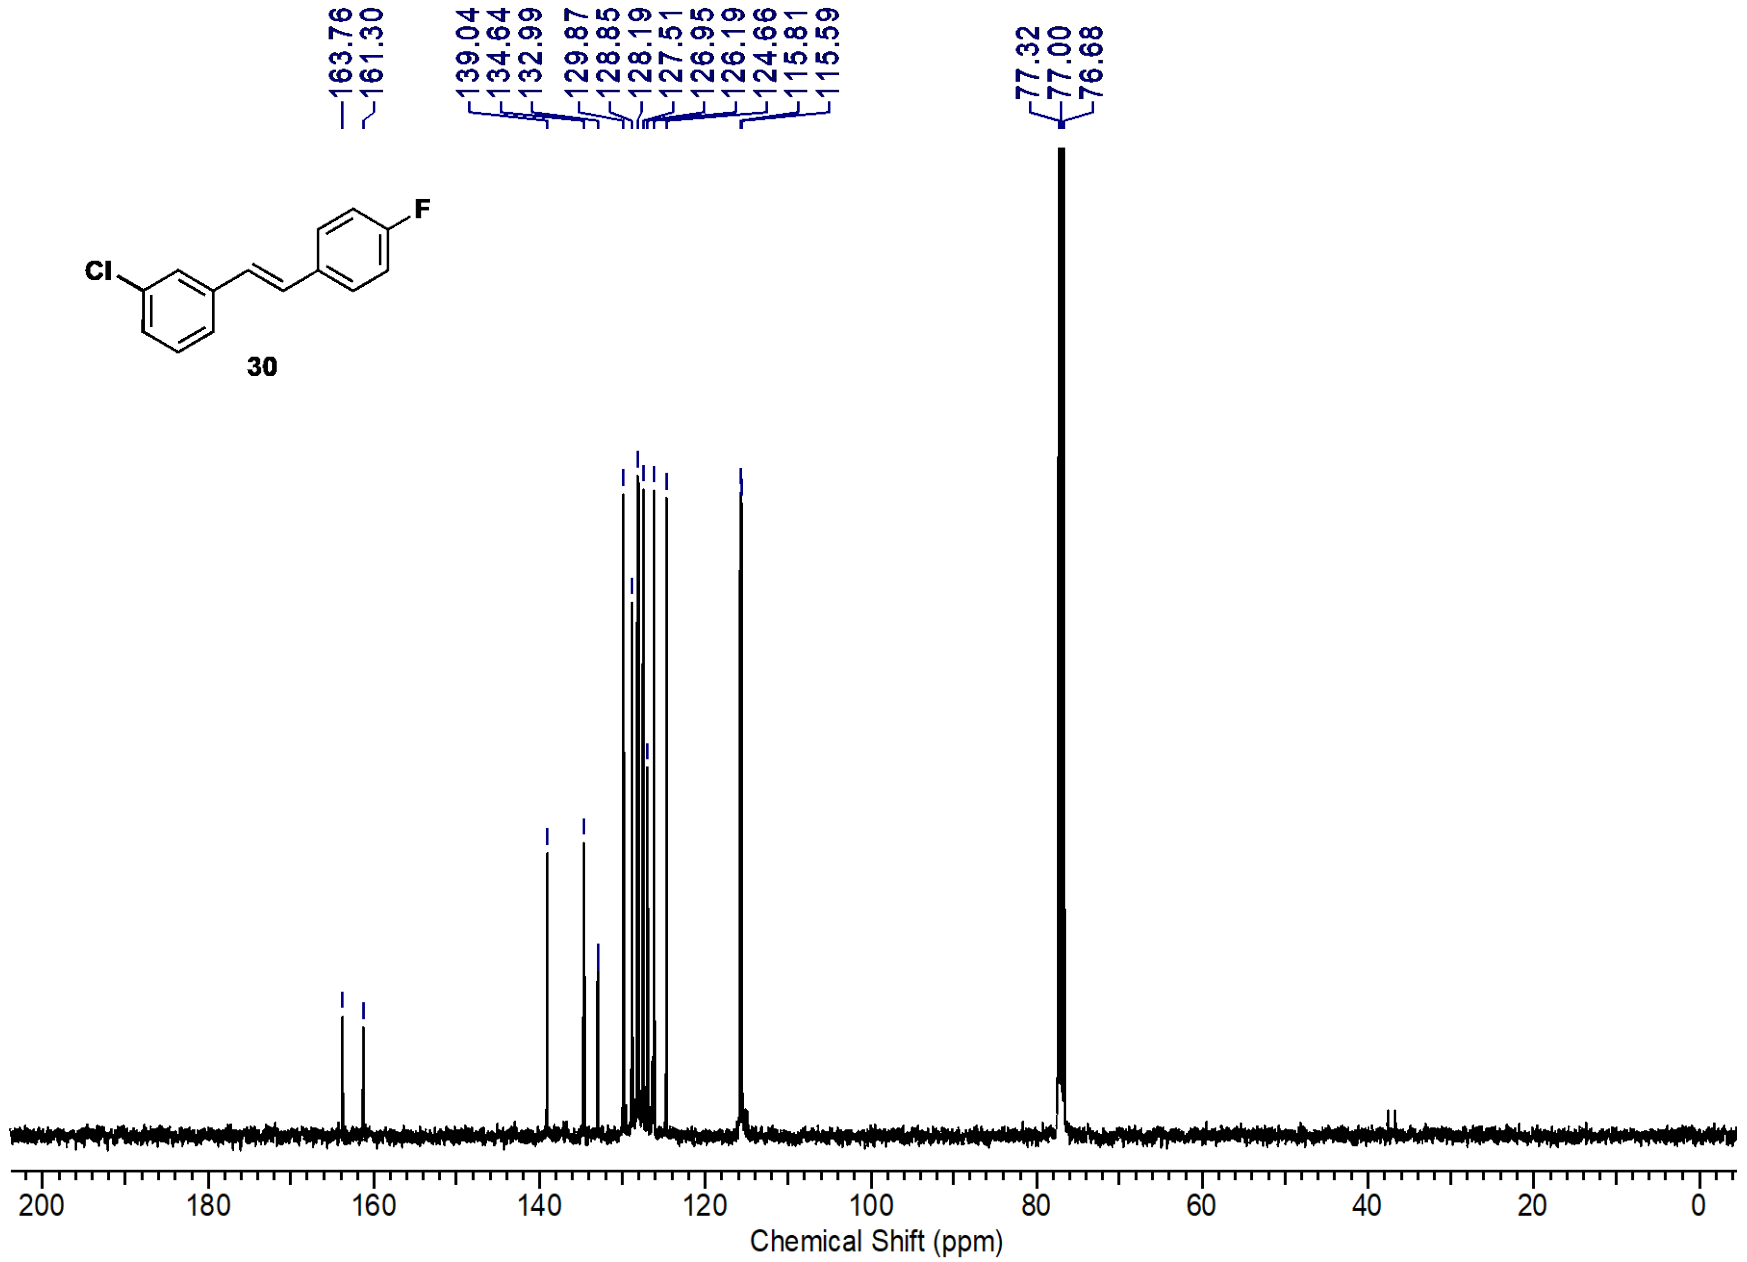

S108

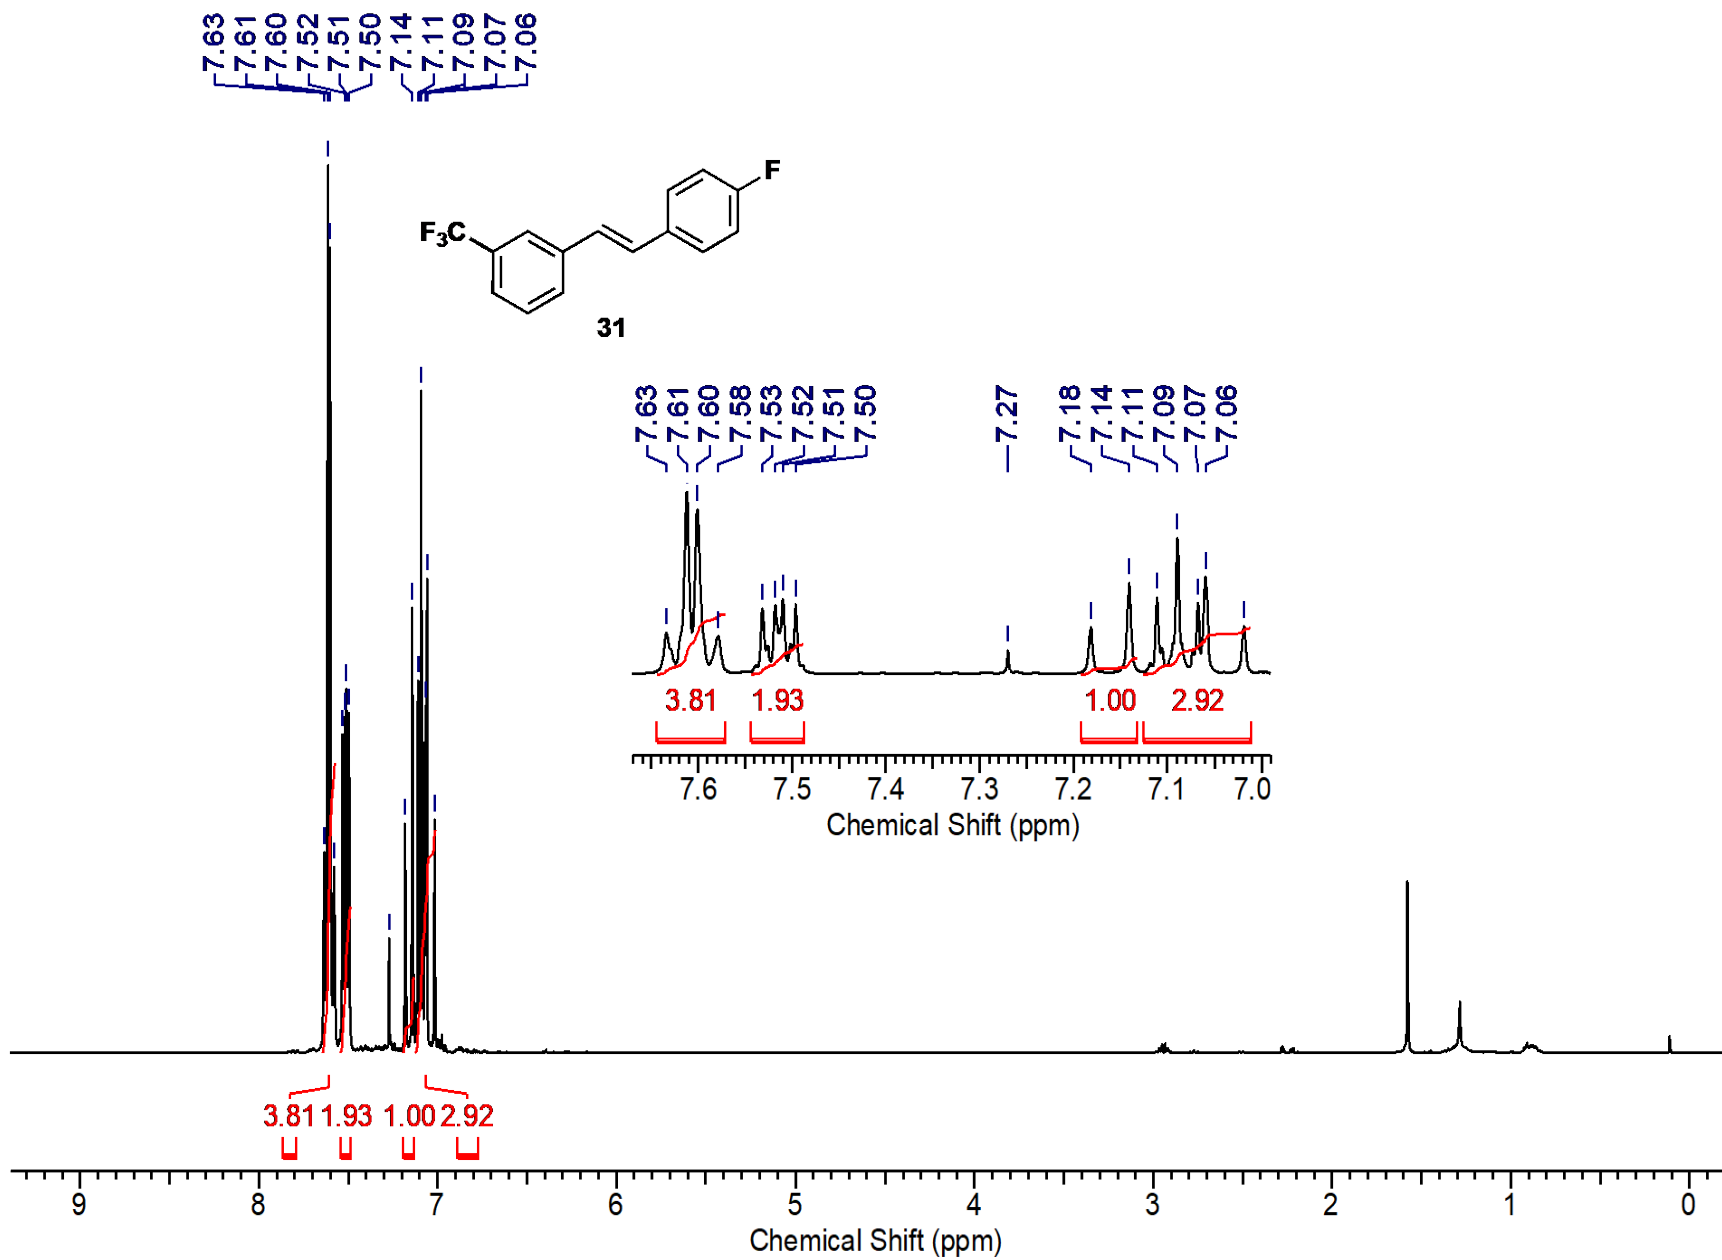

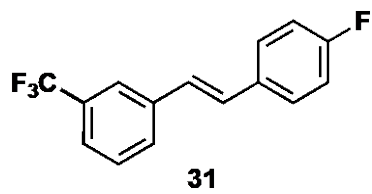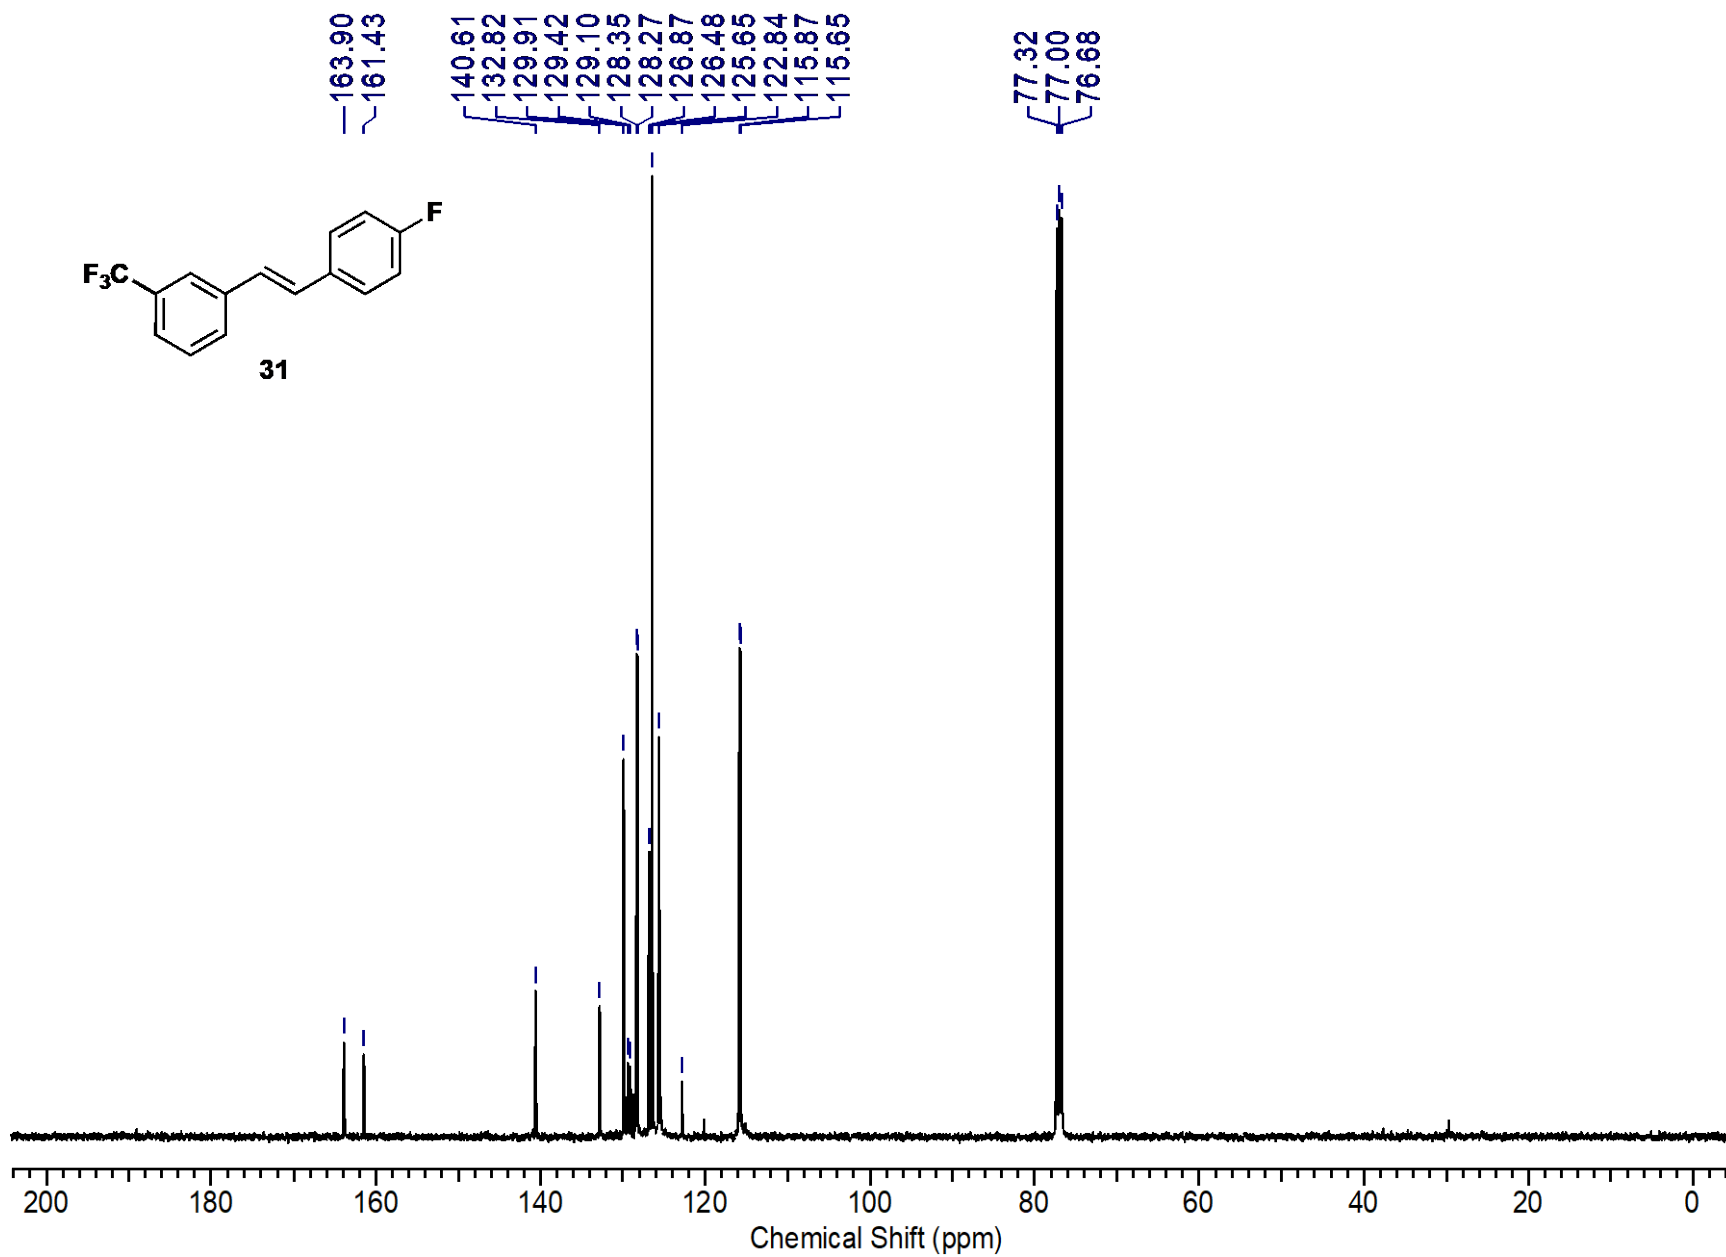

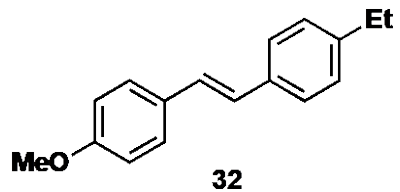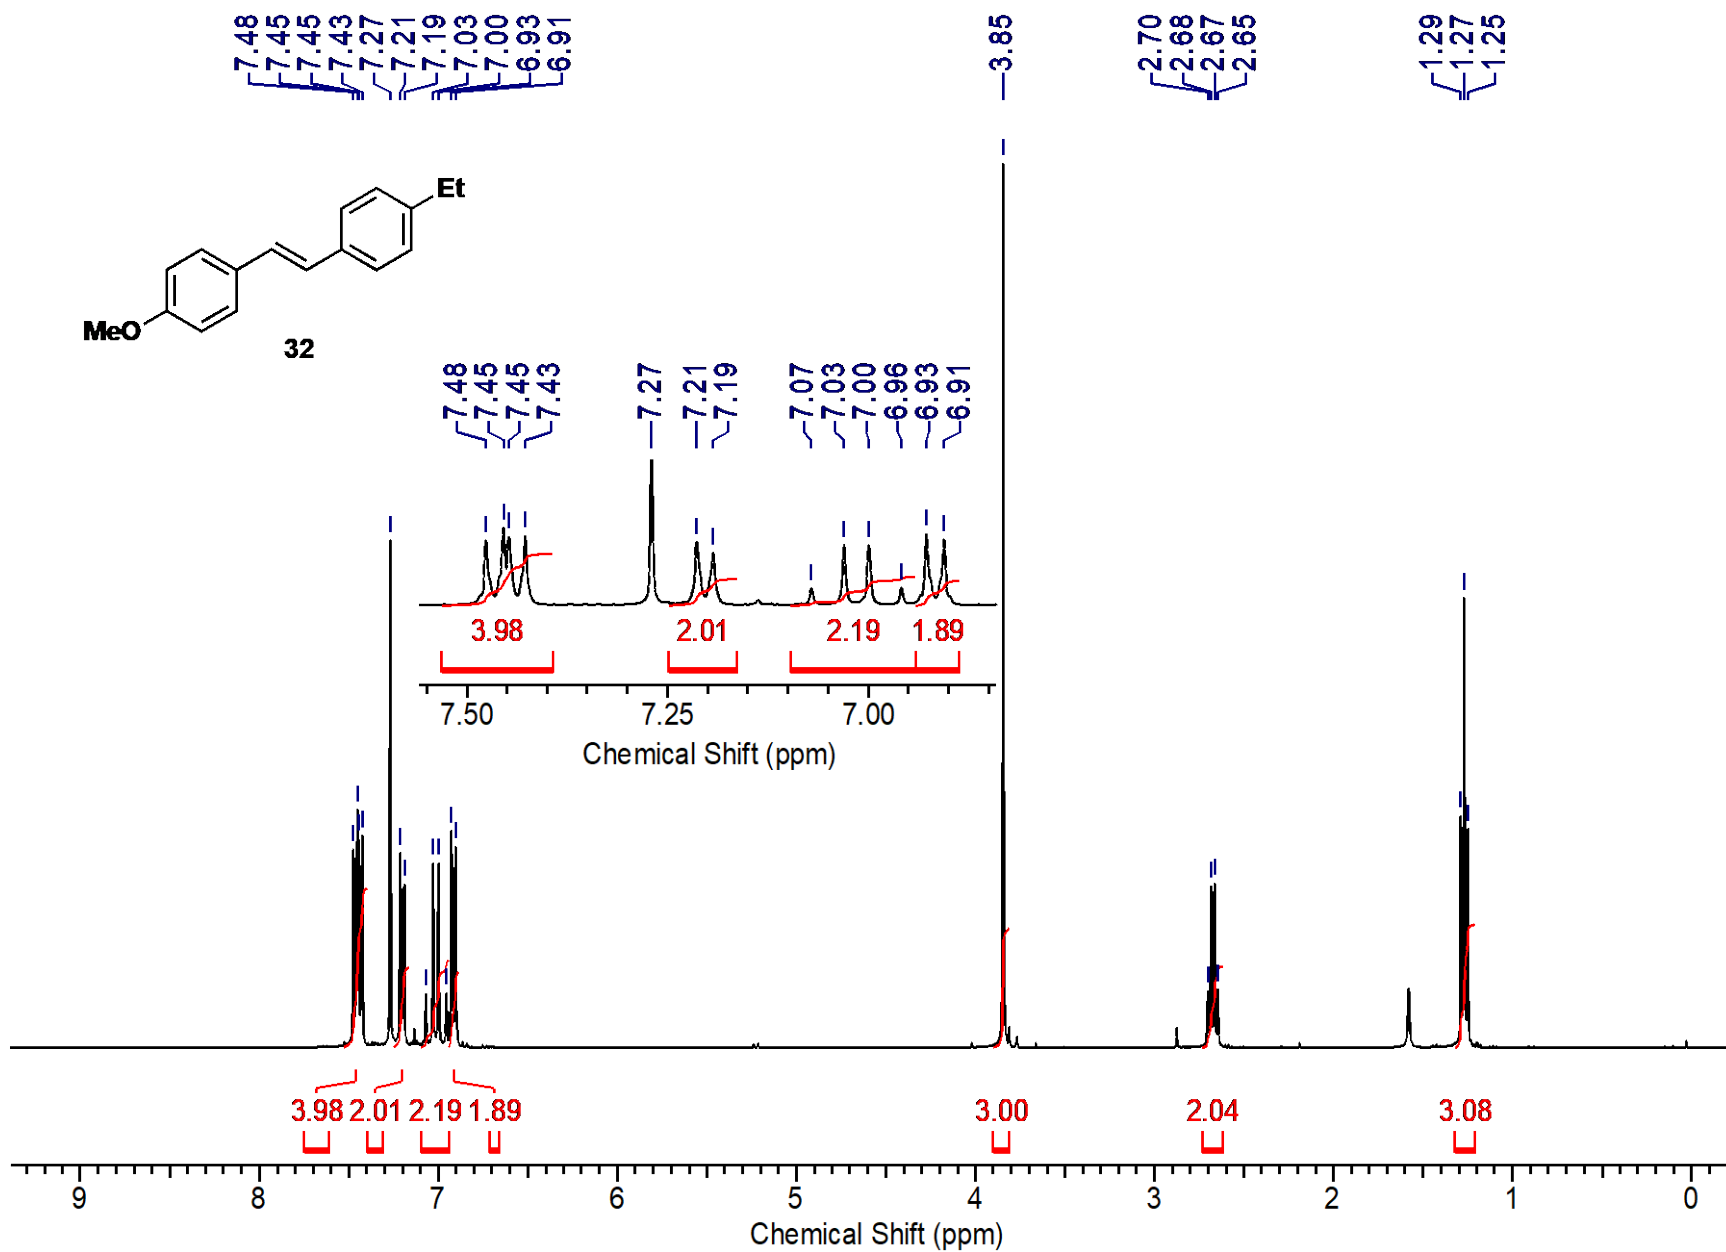

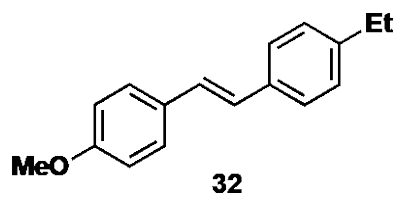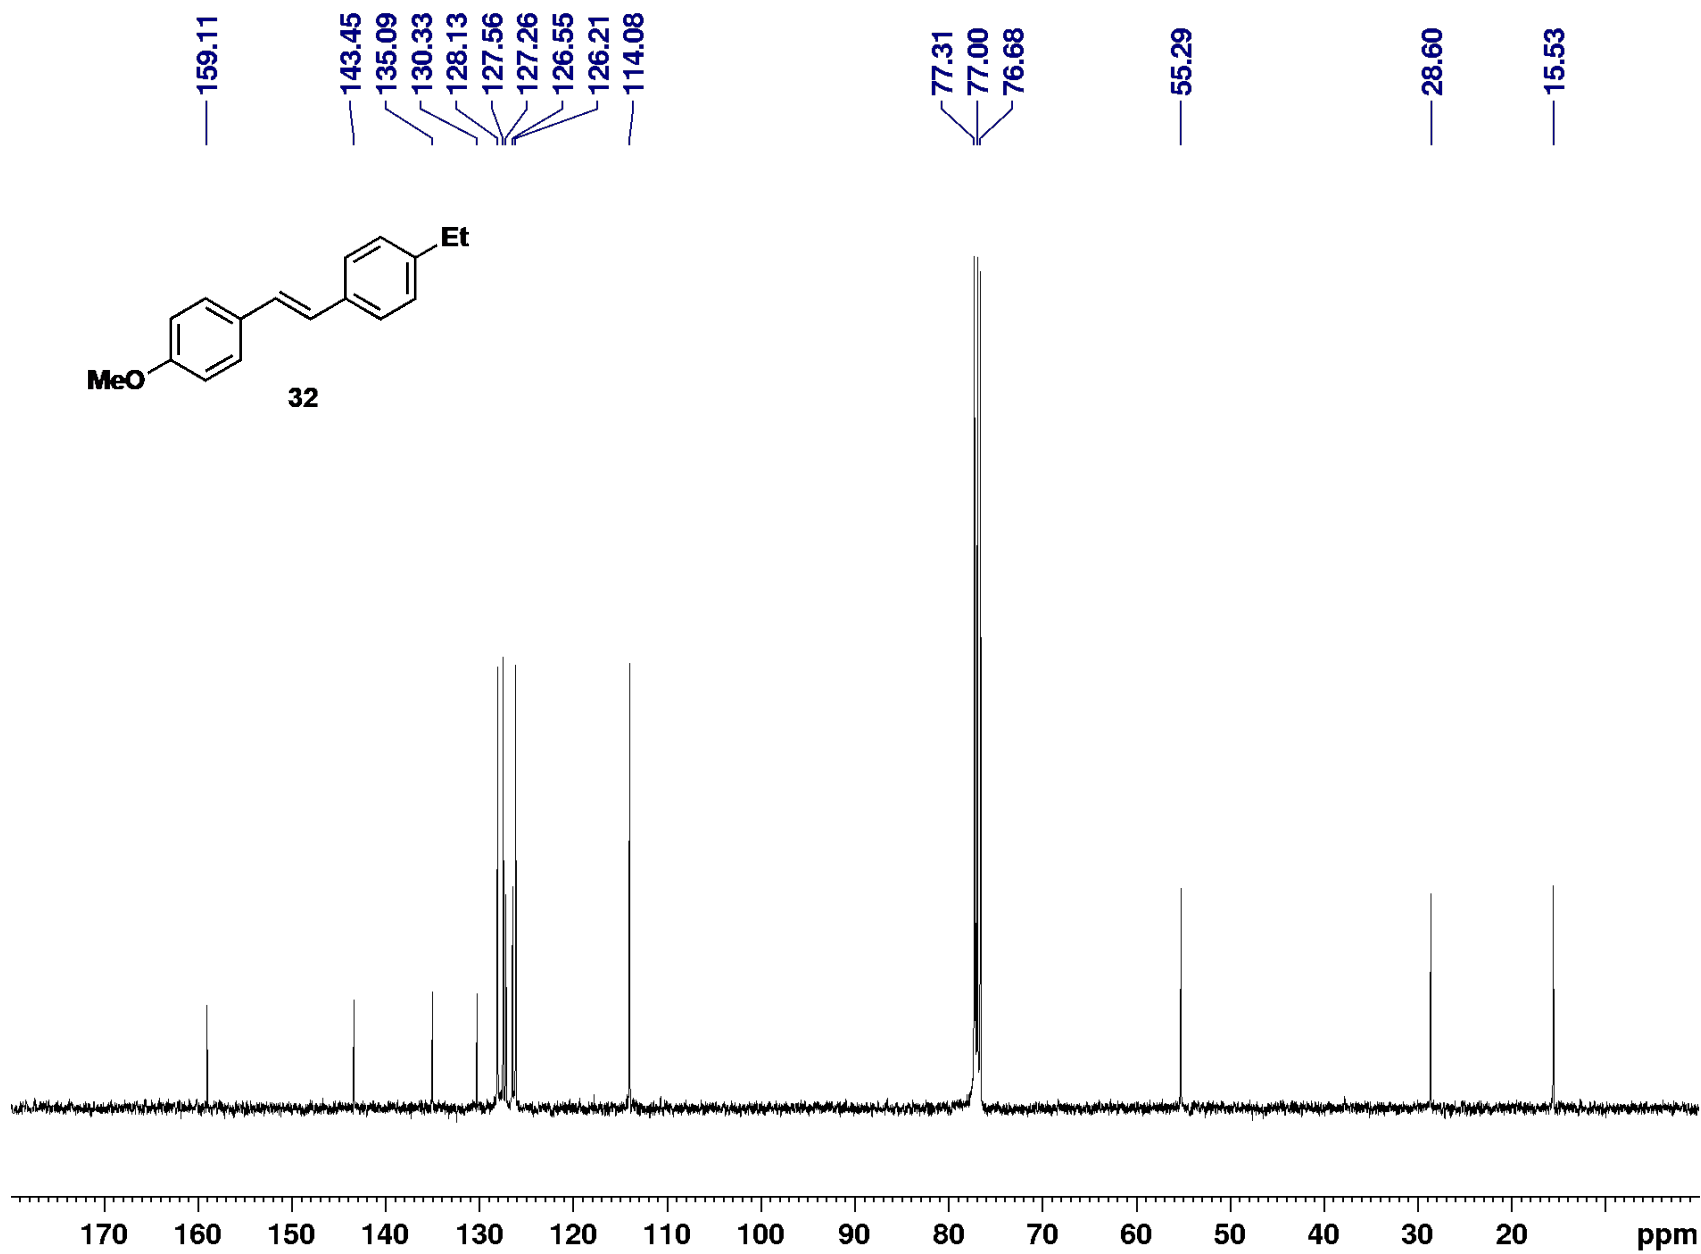



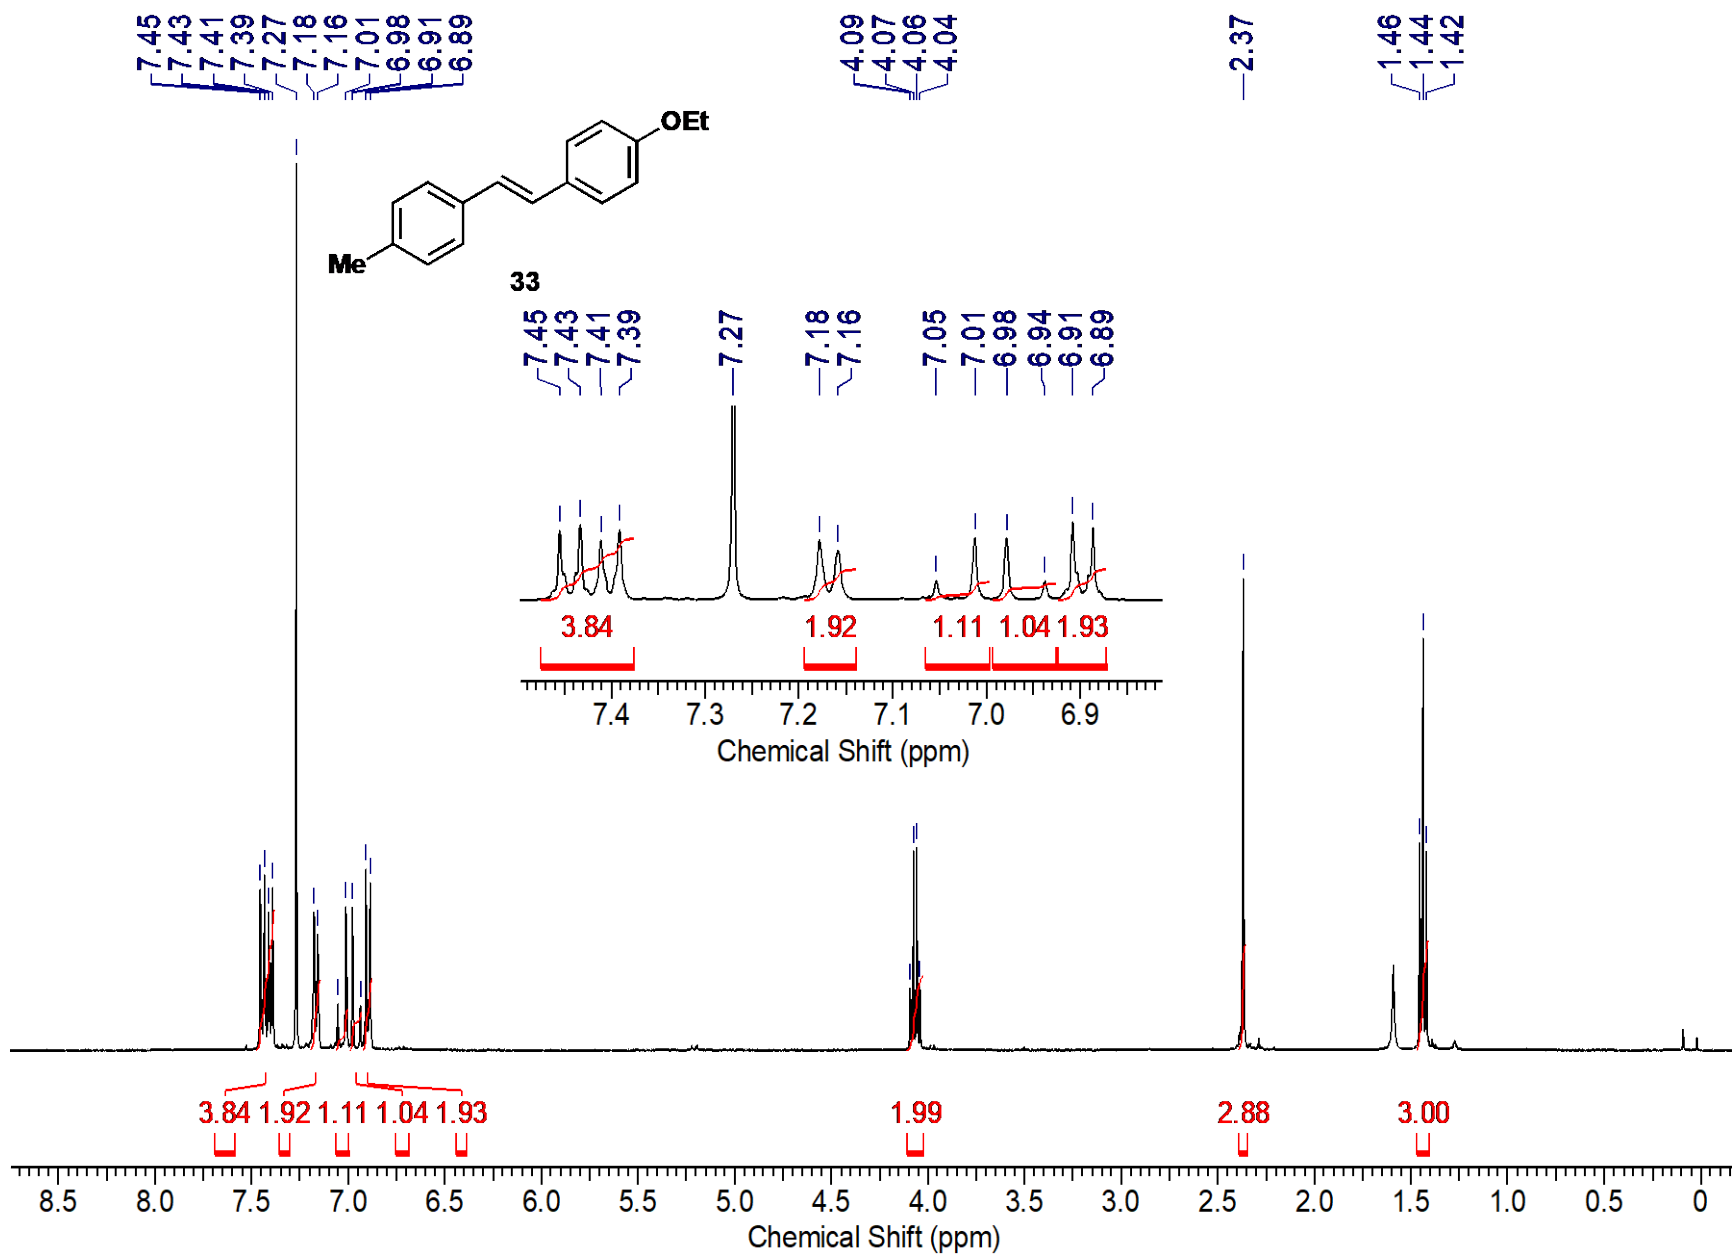

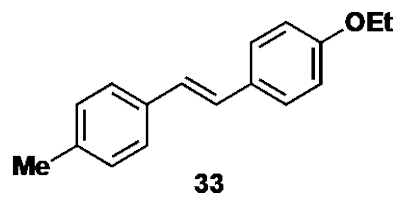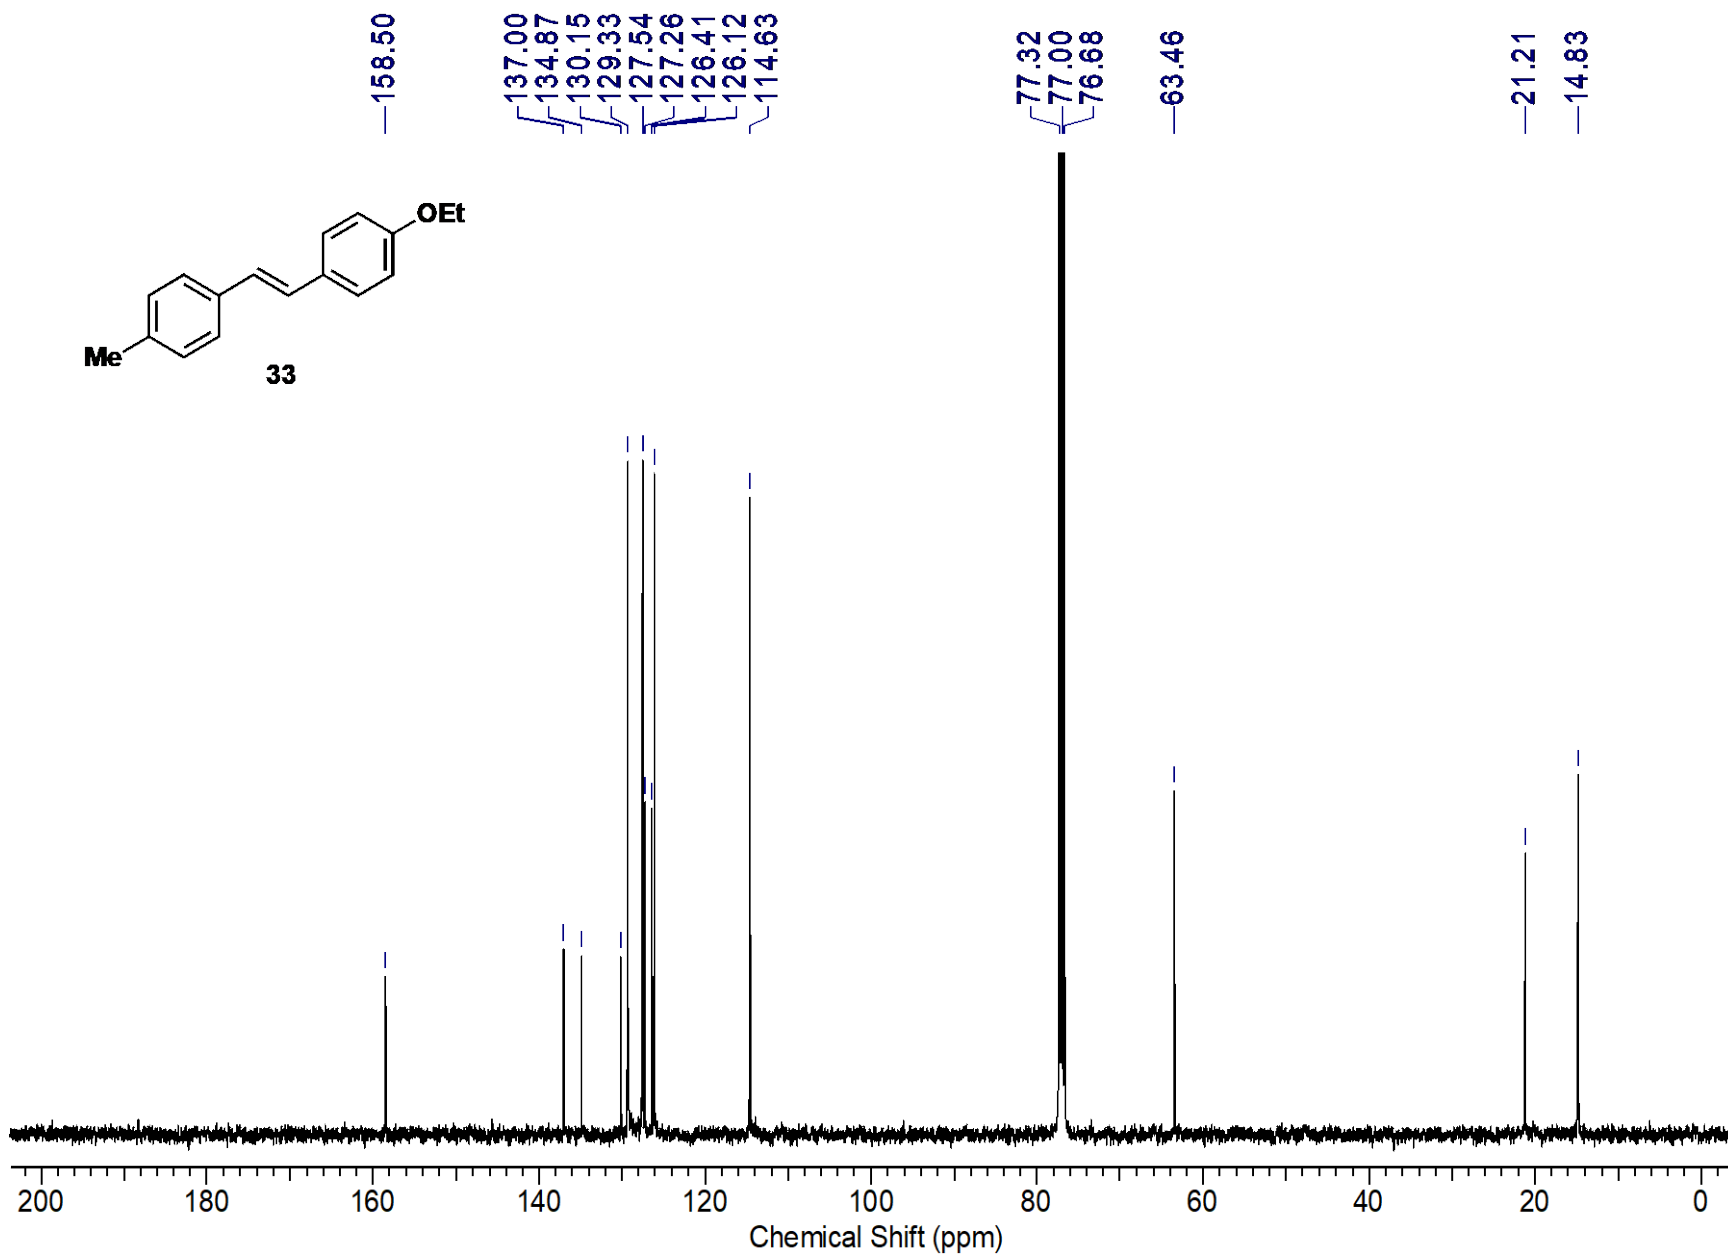

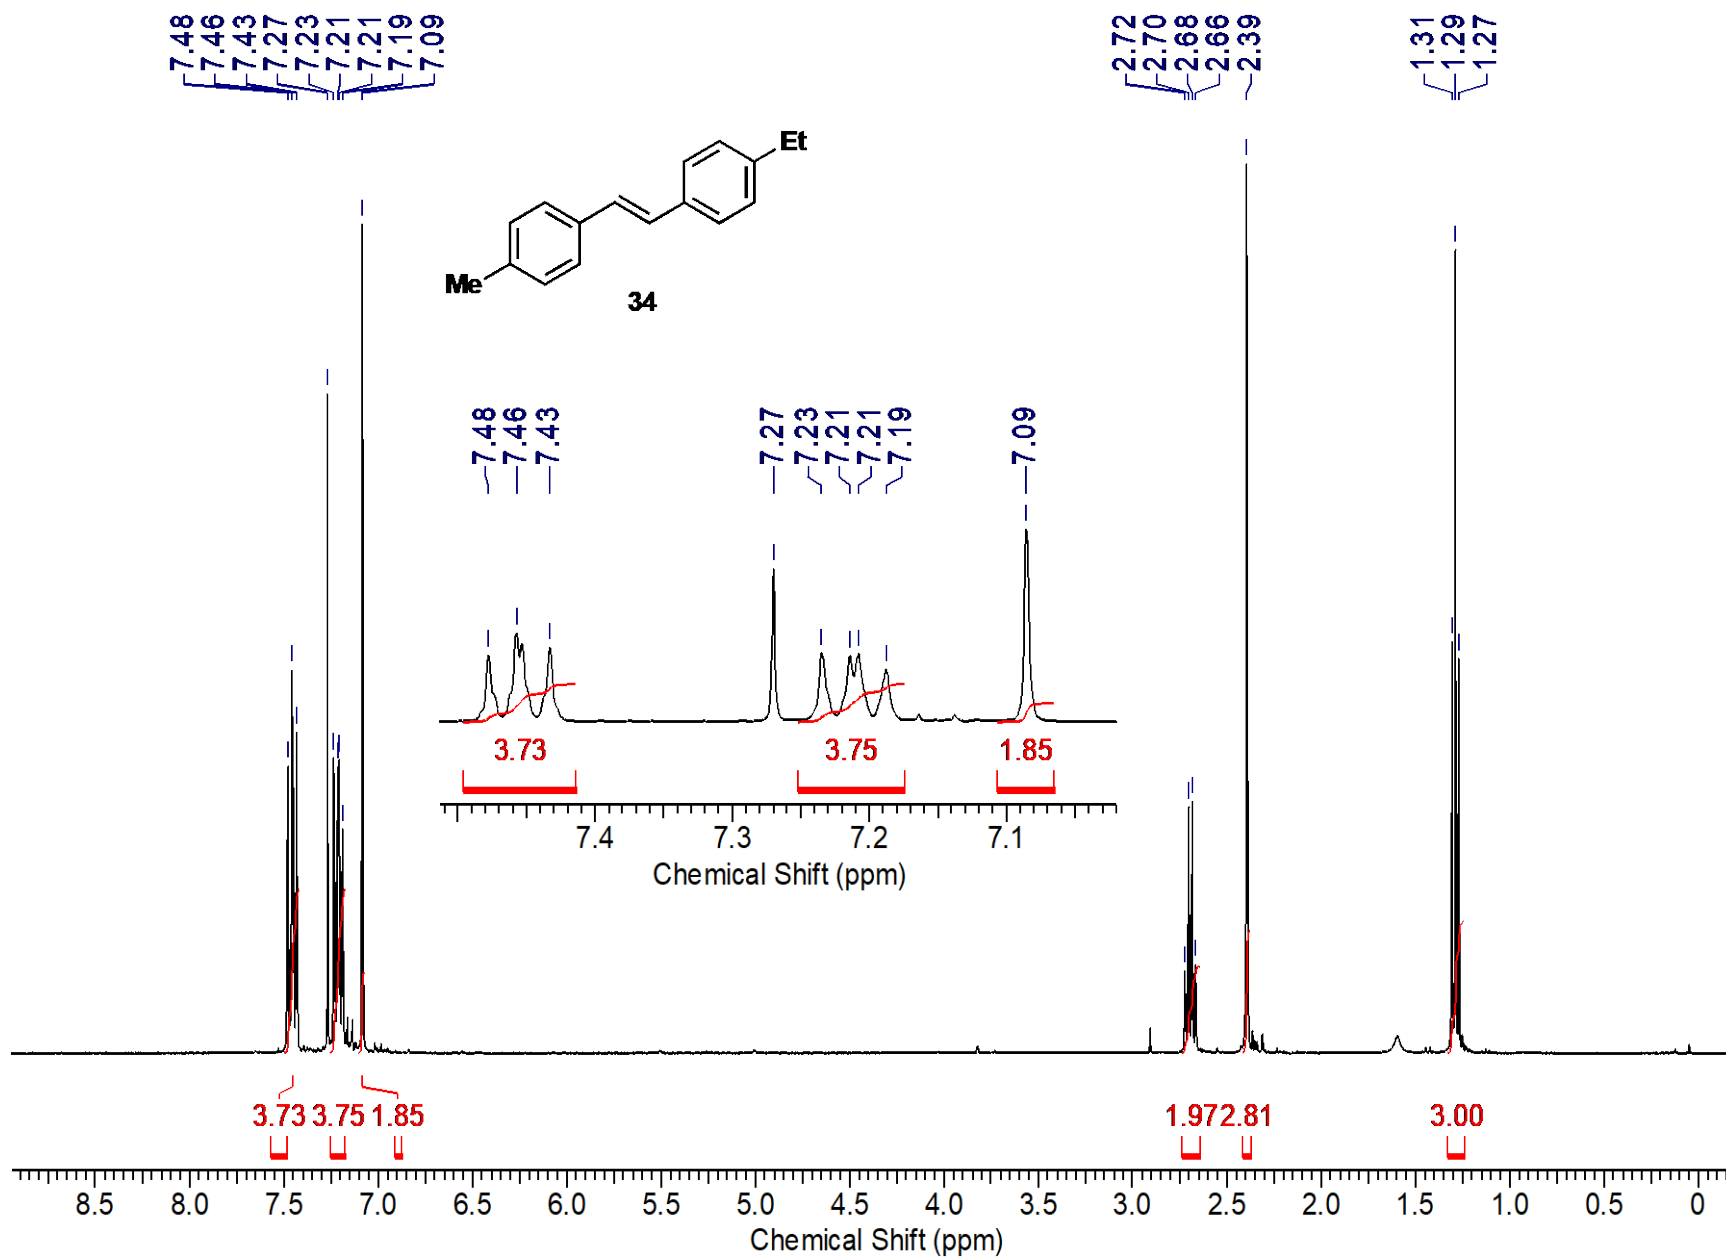

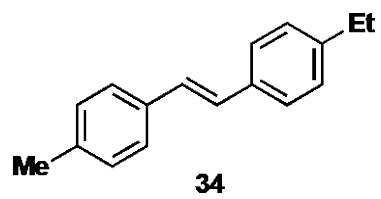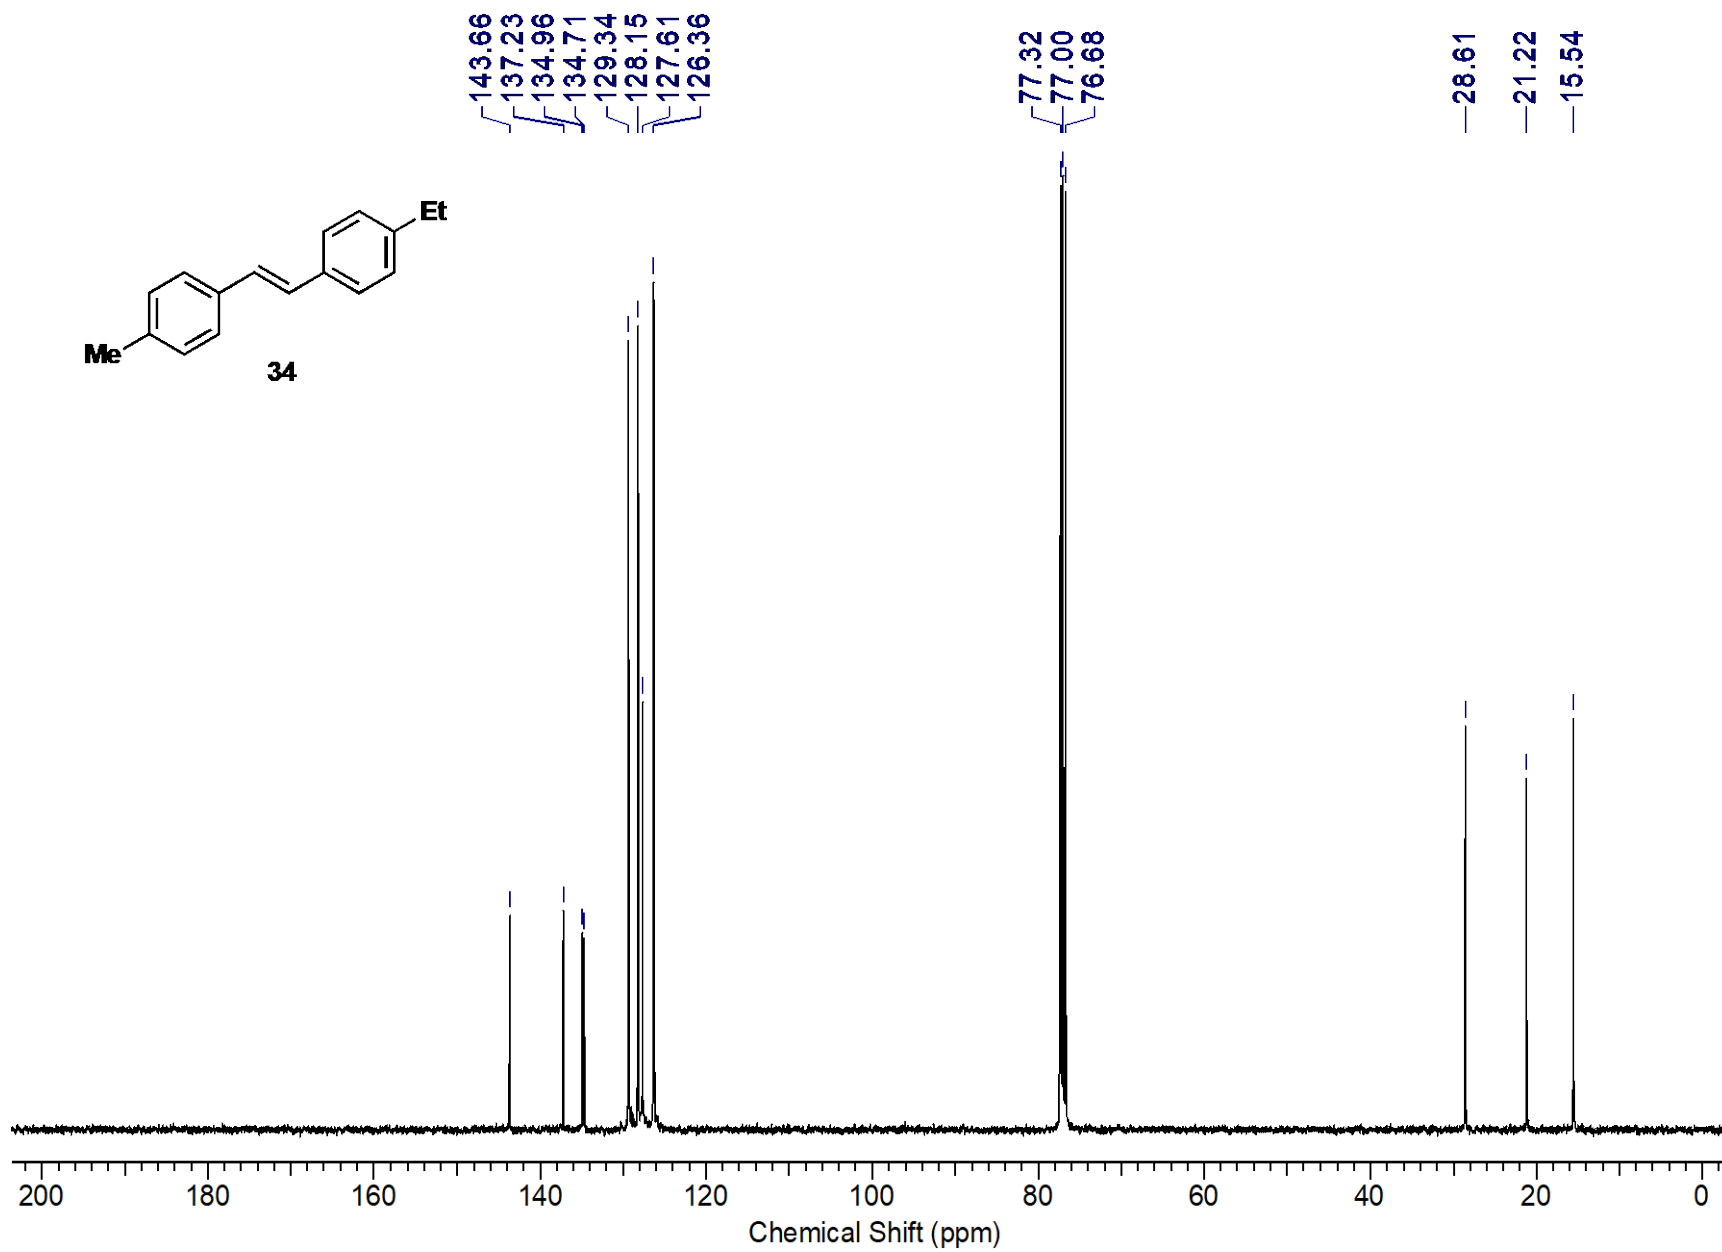

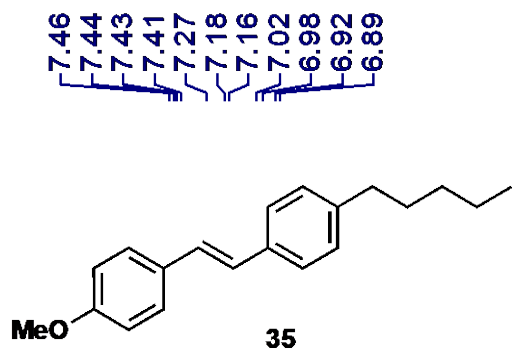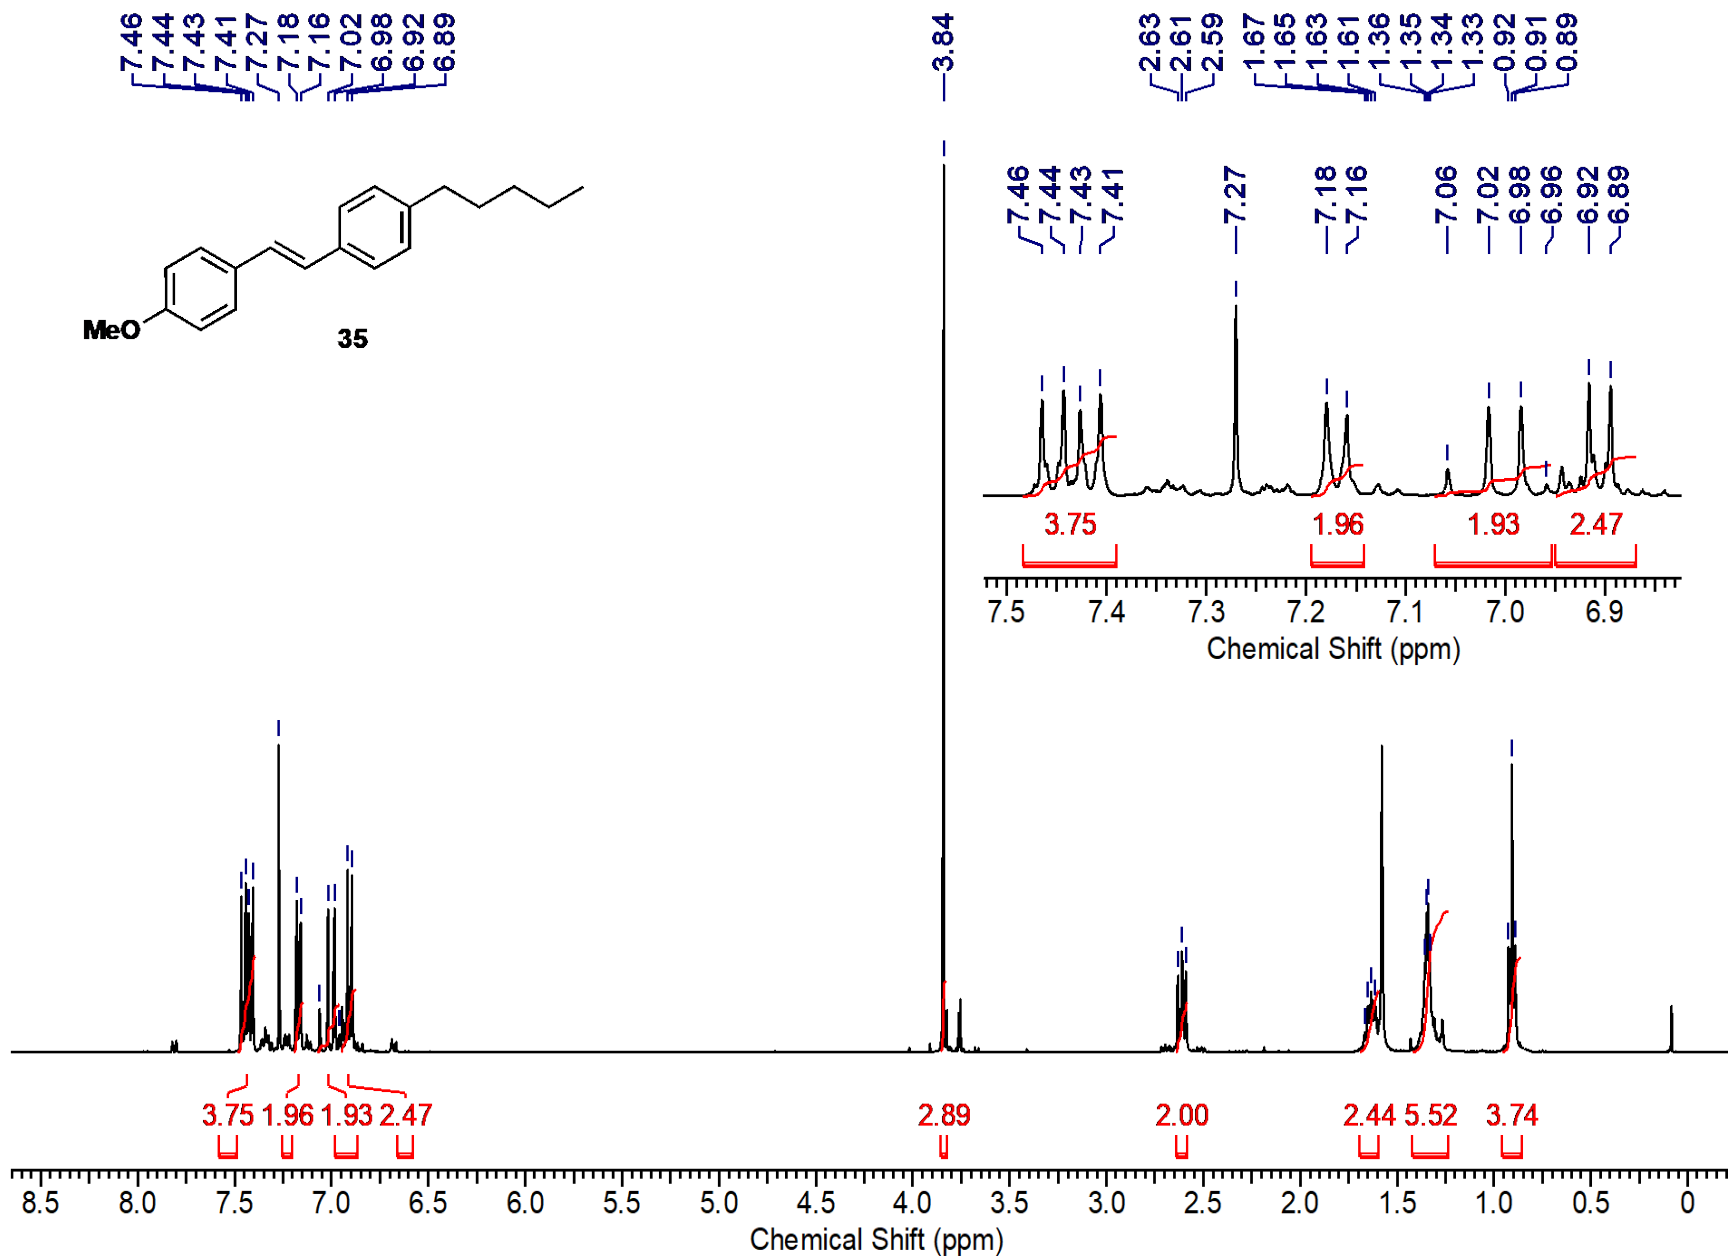

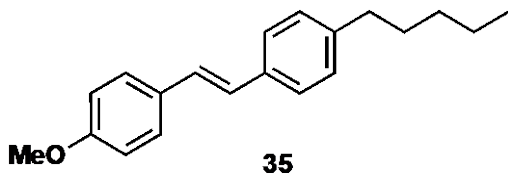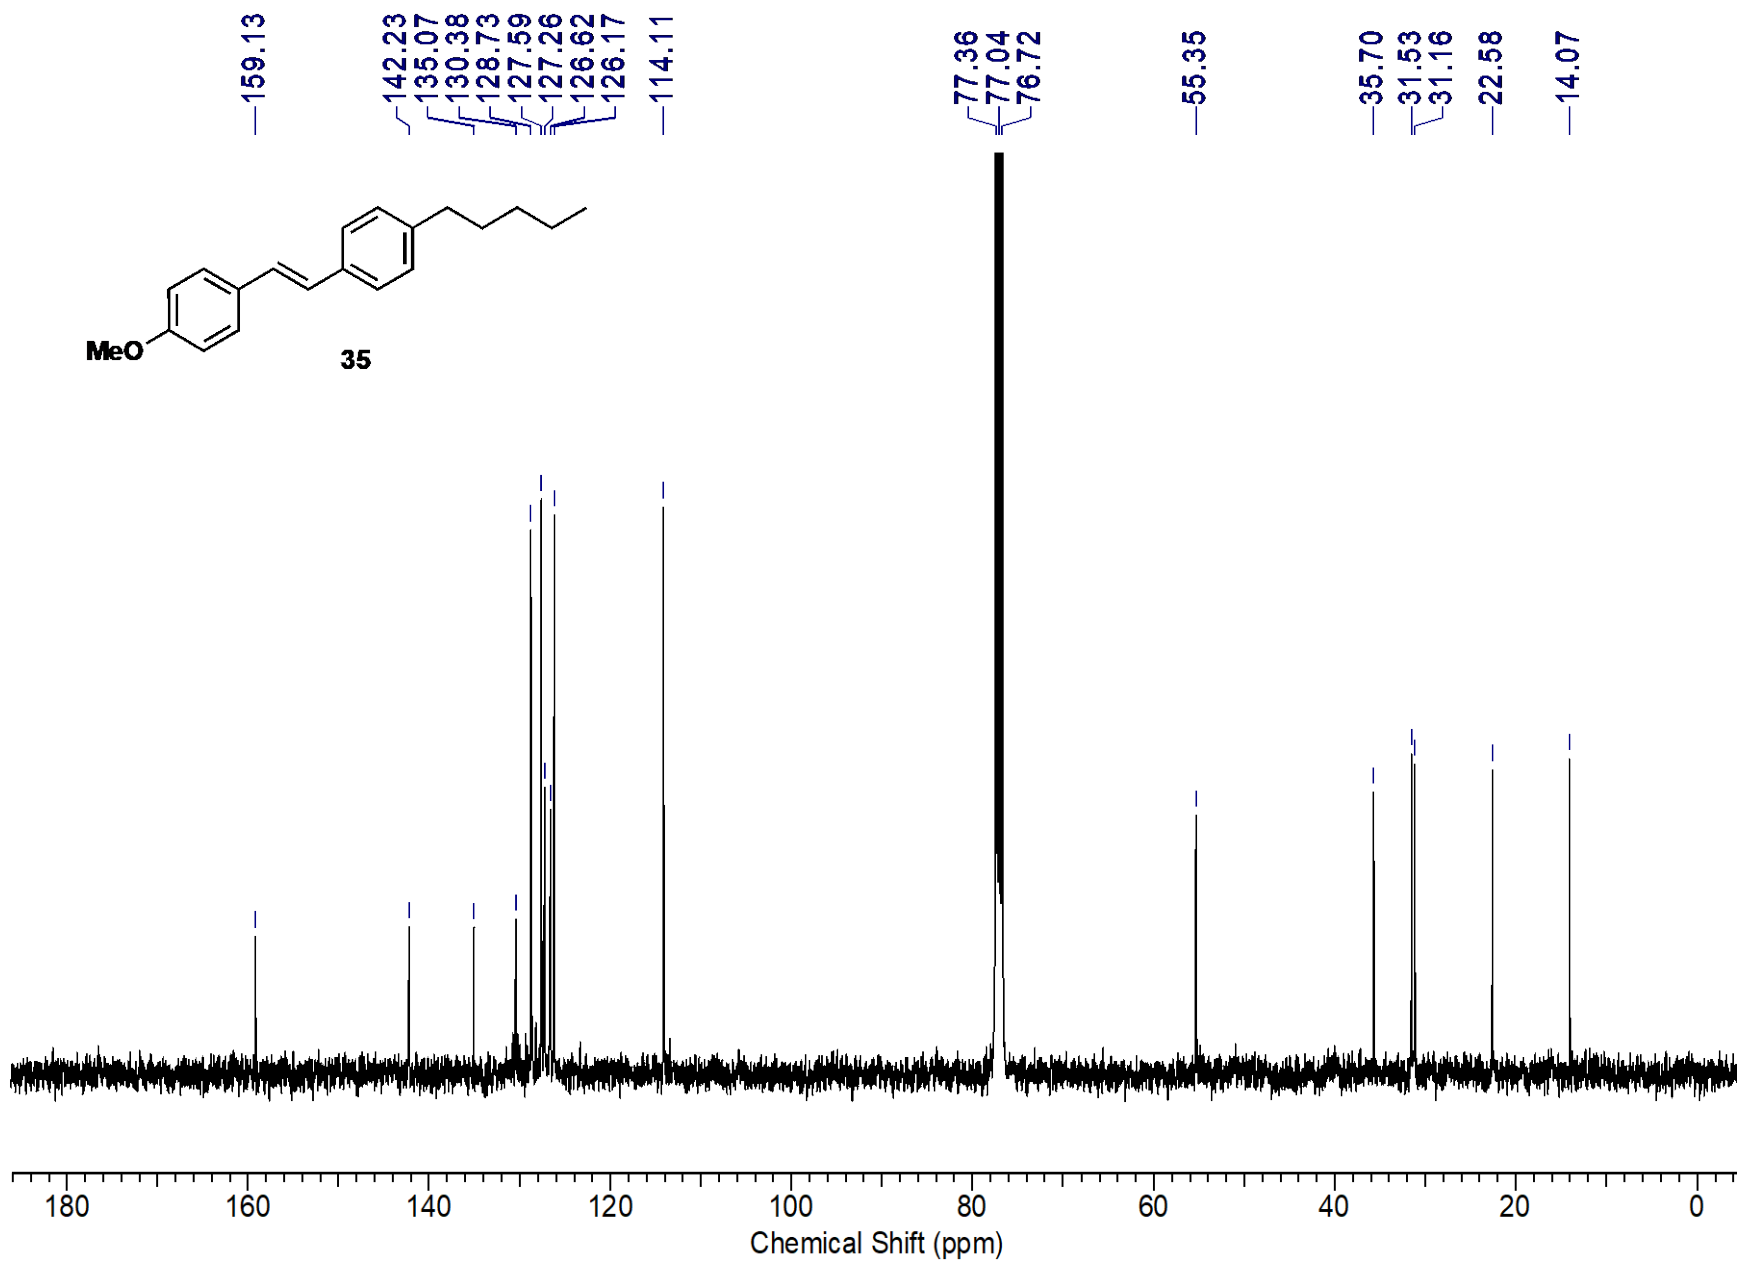

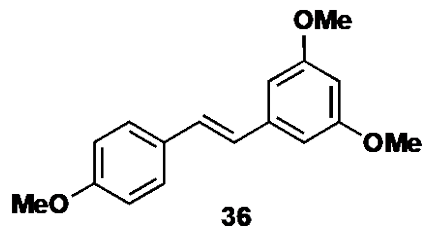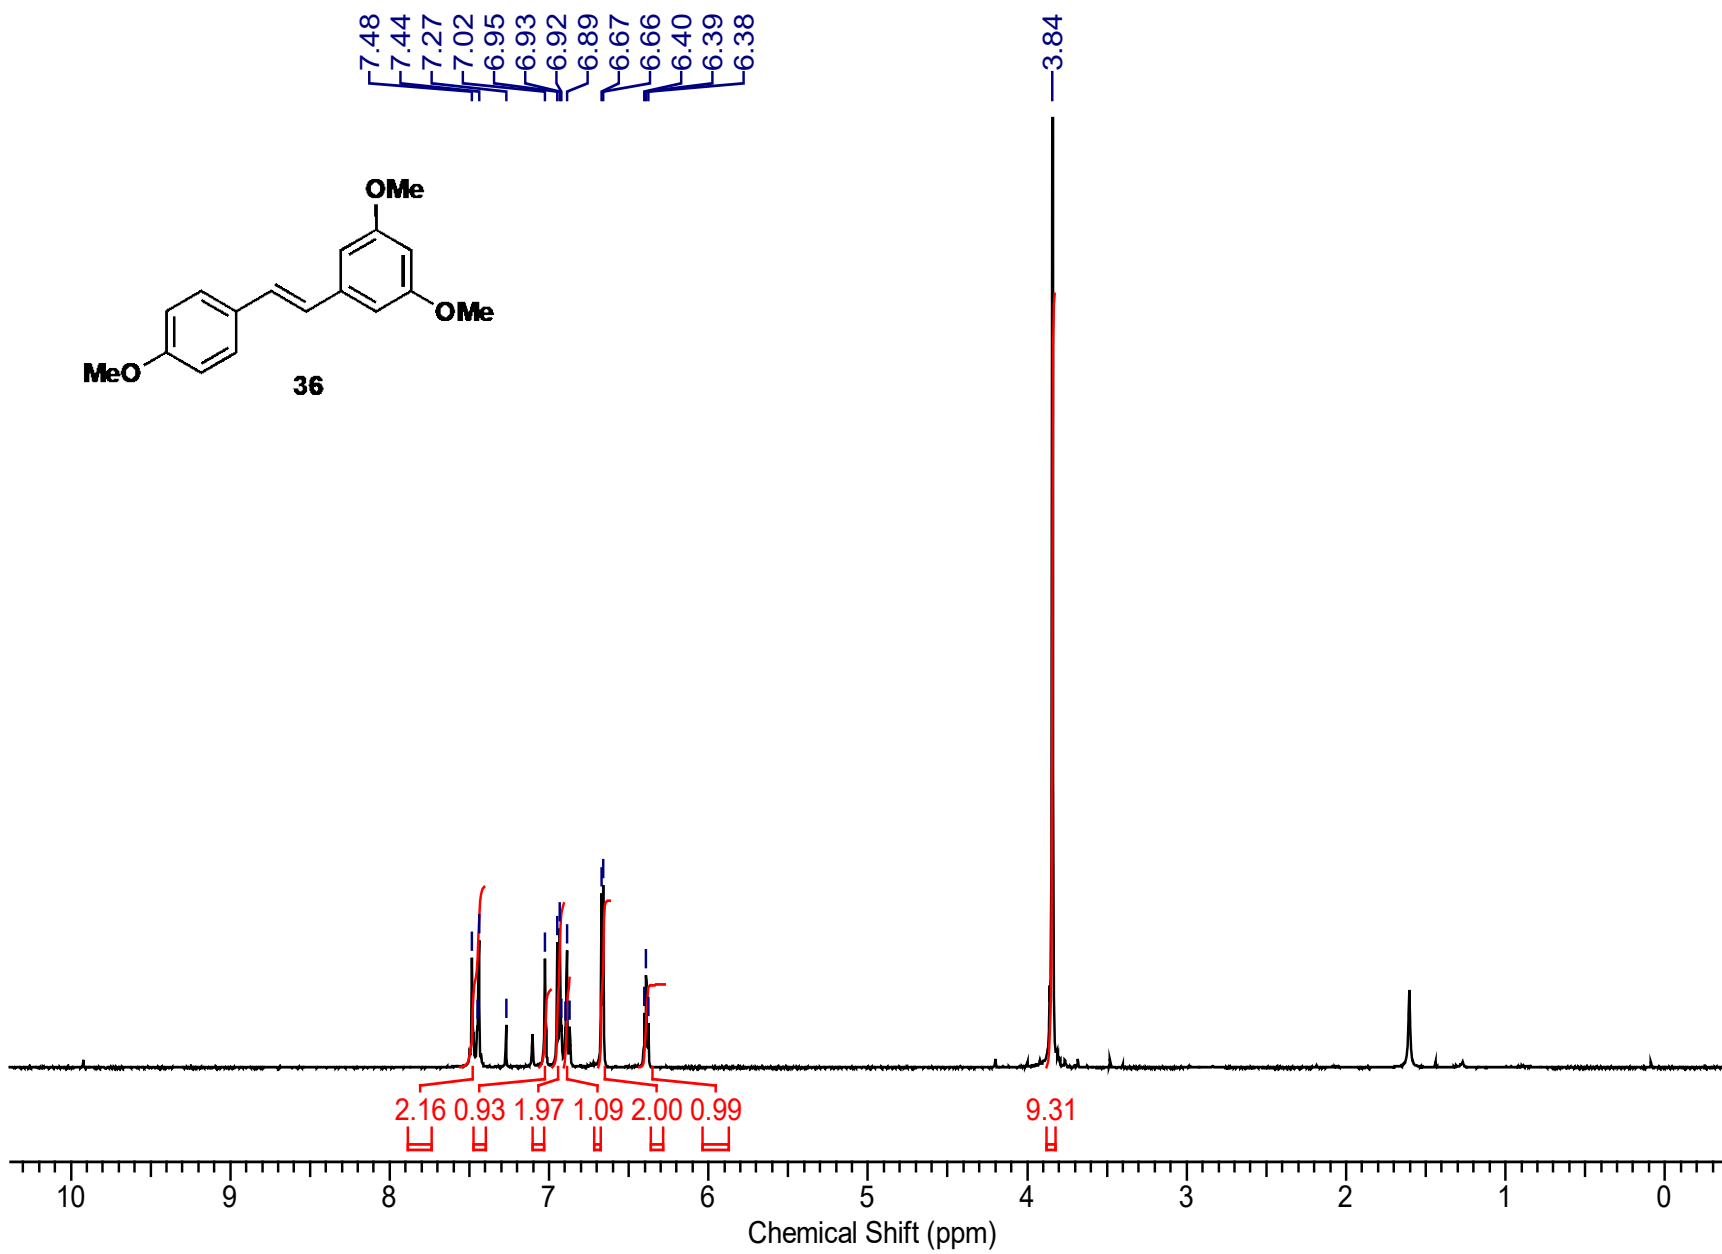

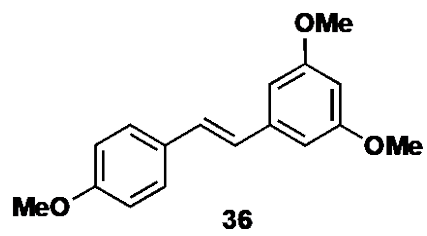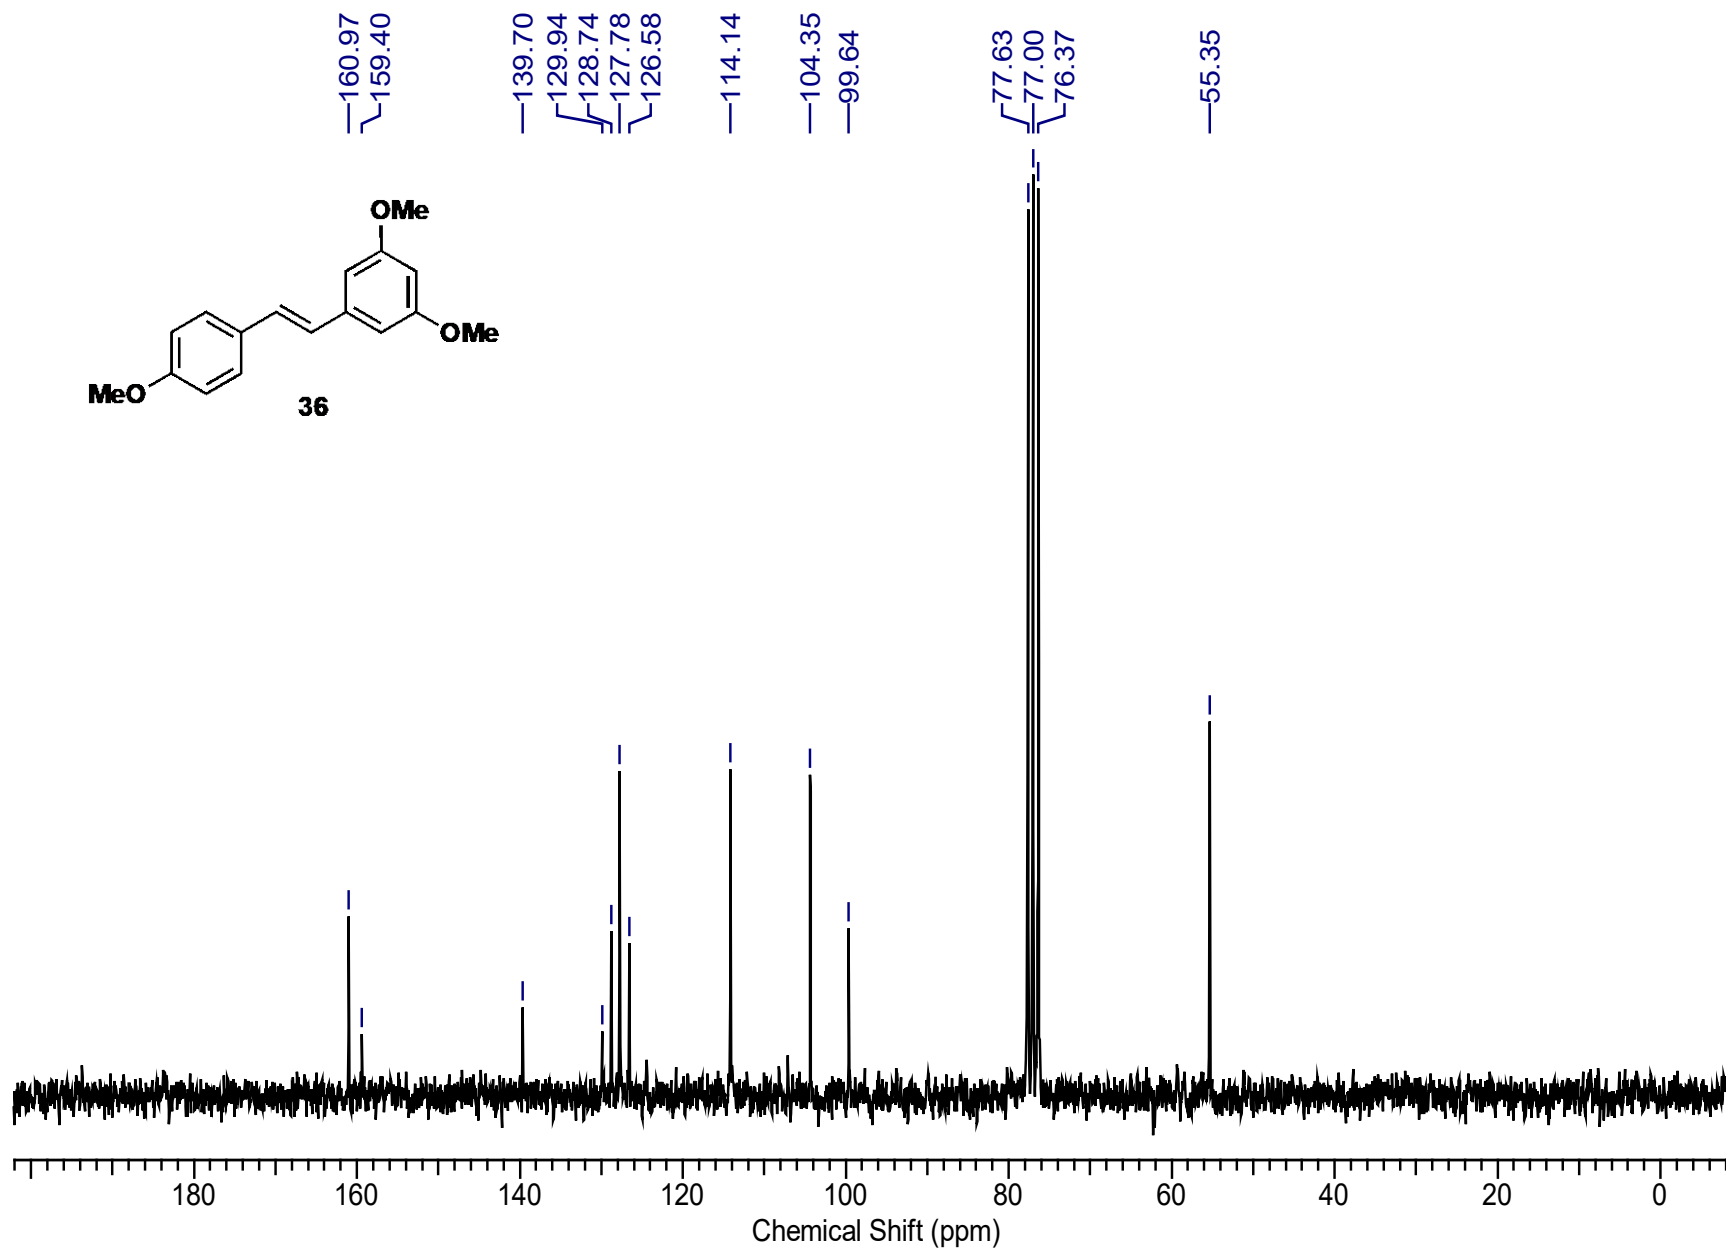

S120



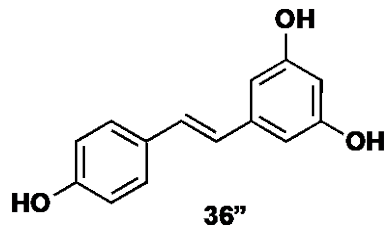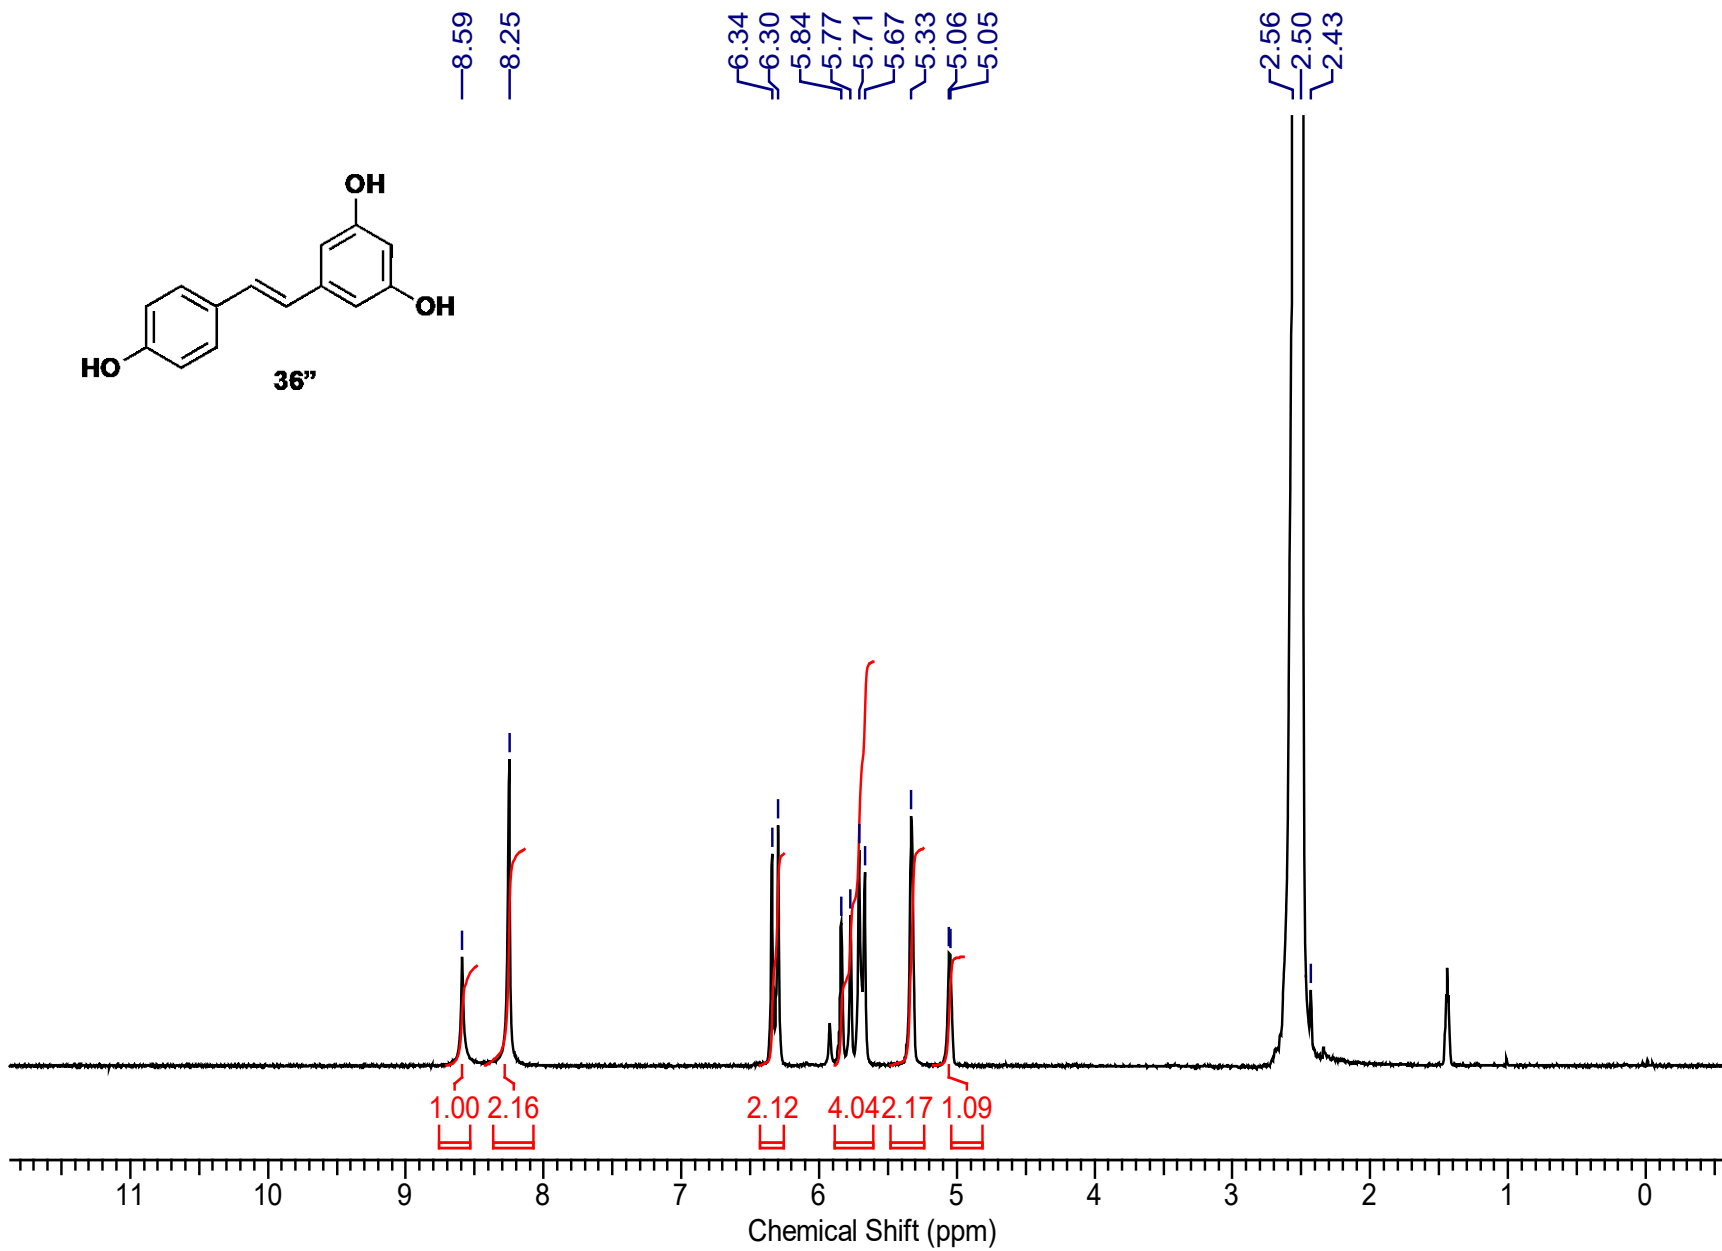

S121

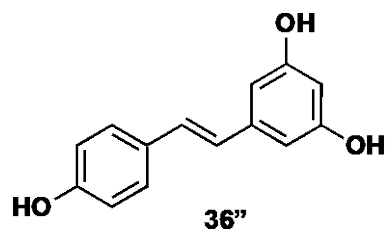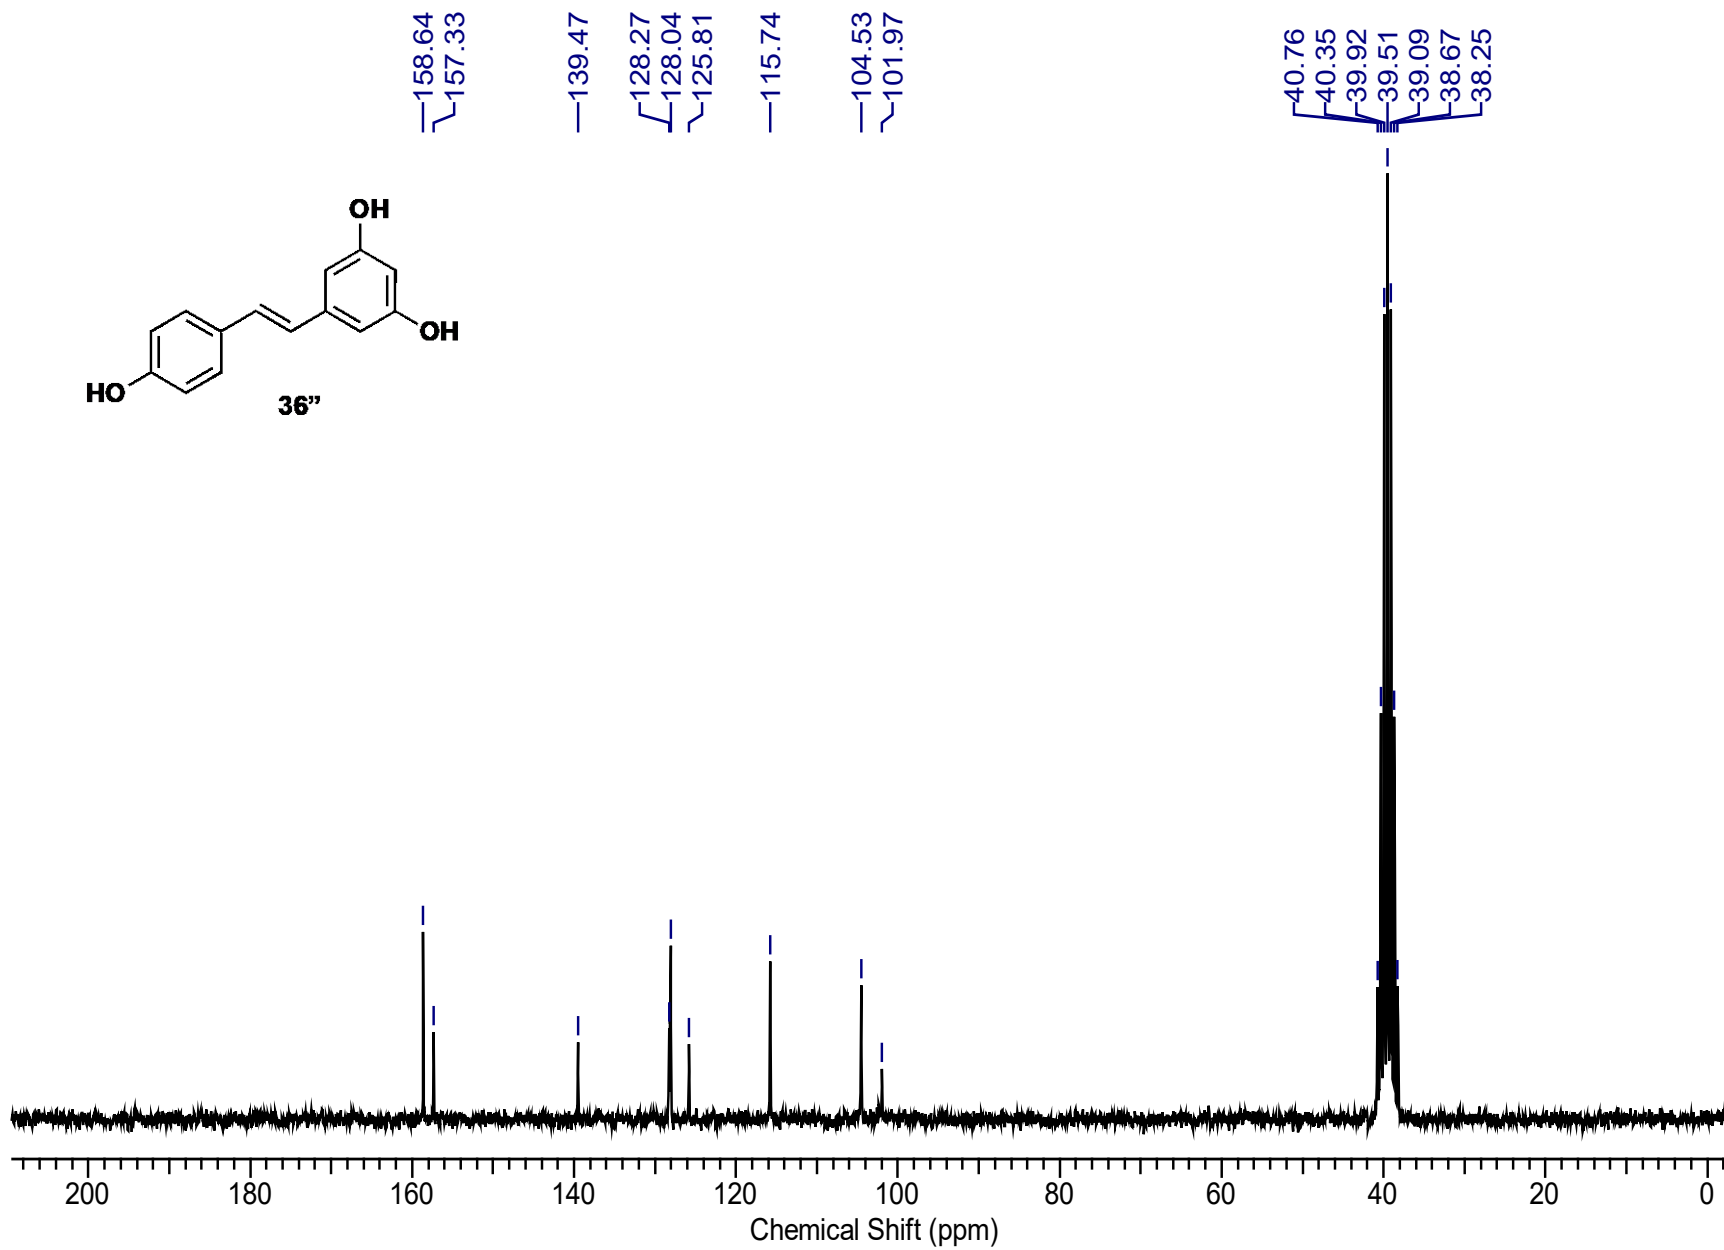

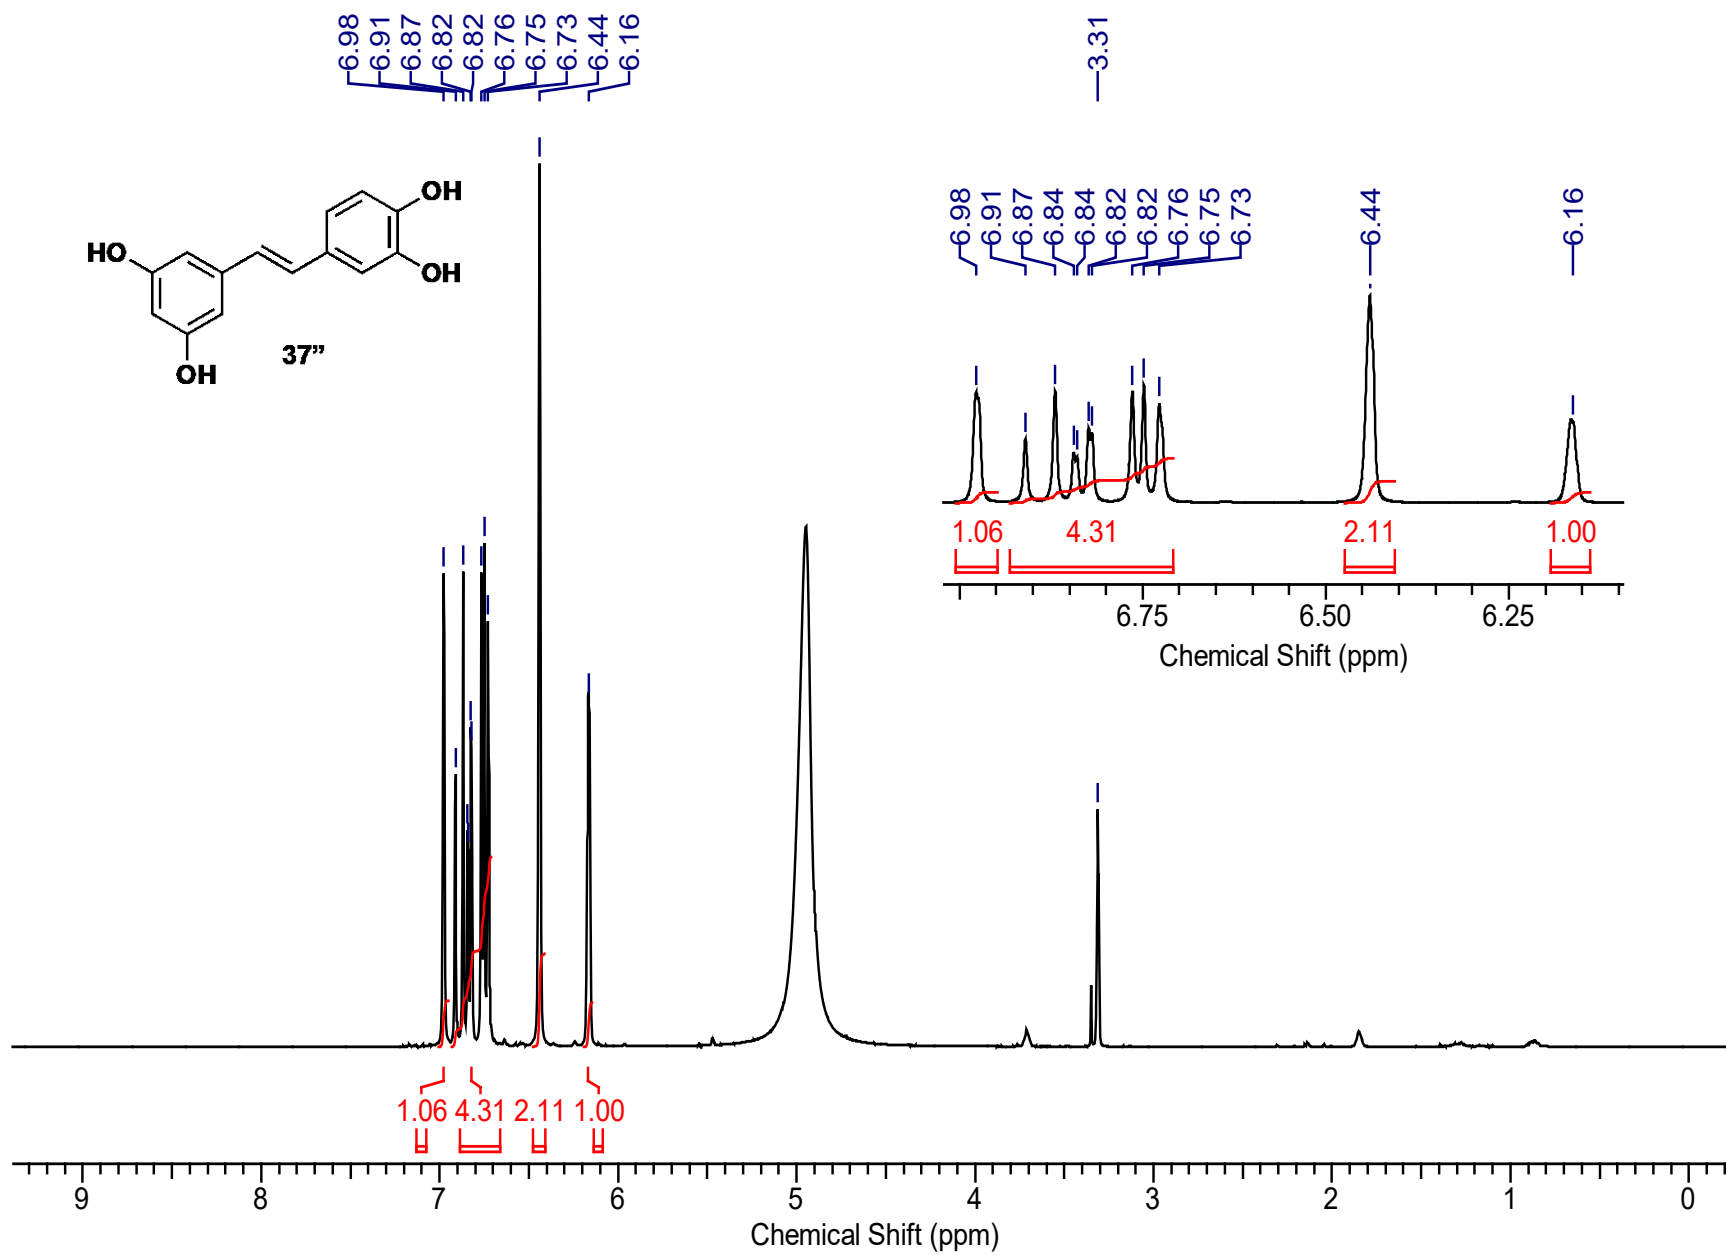

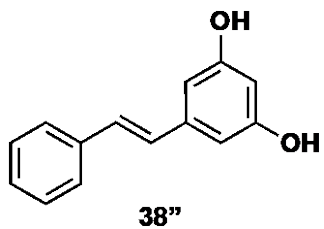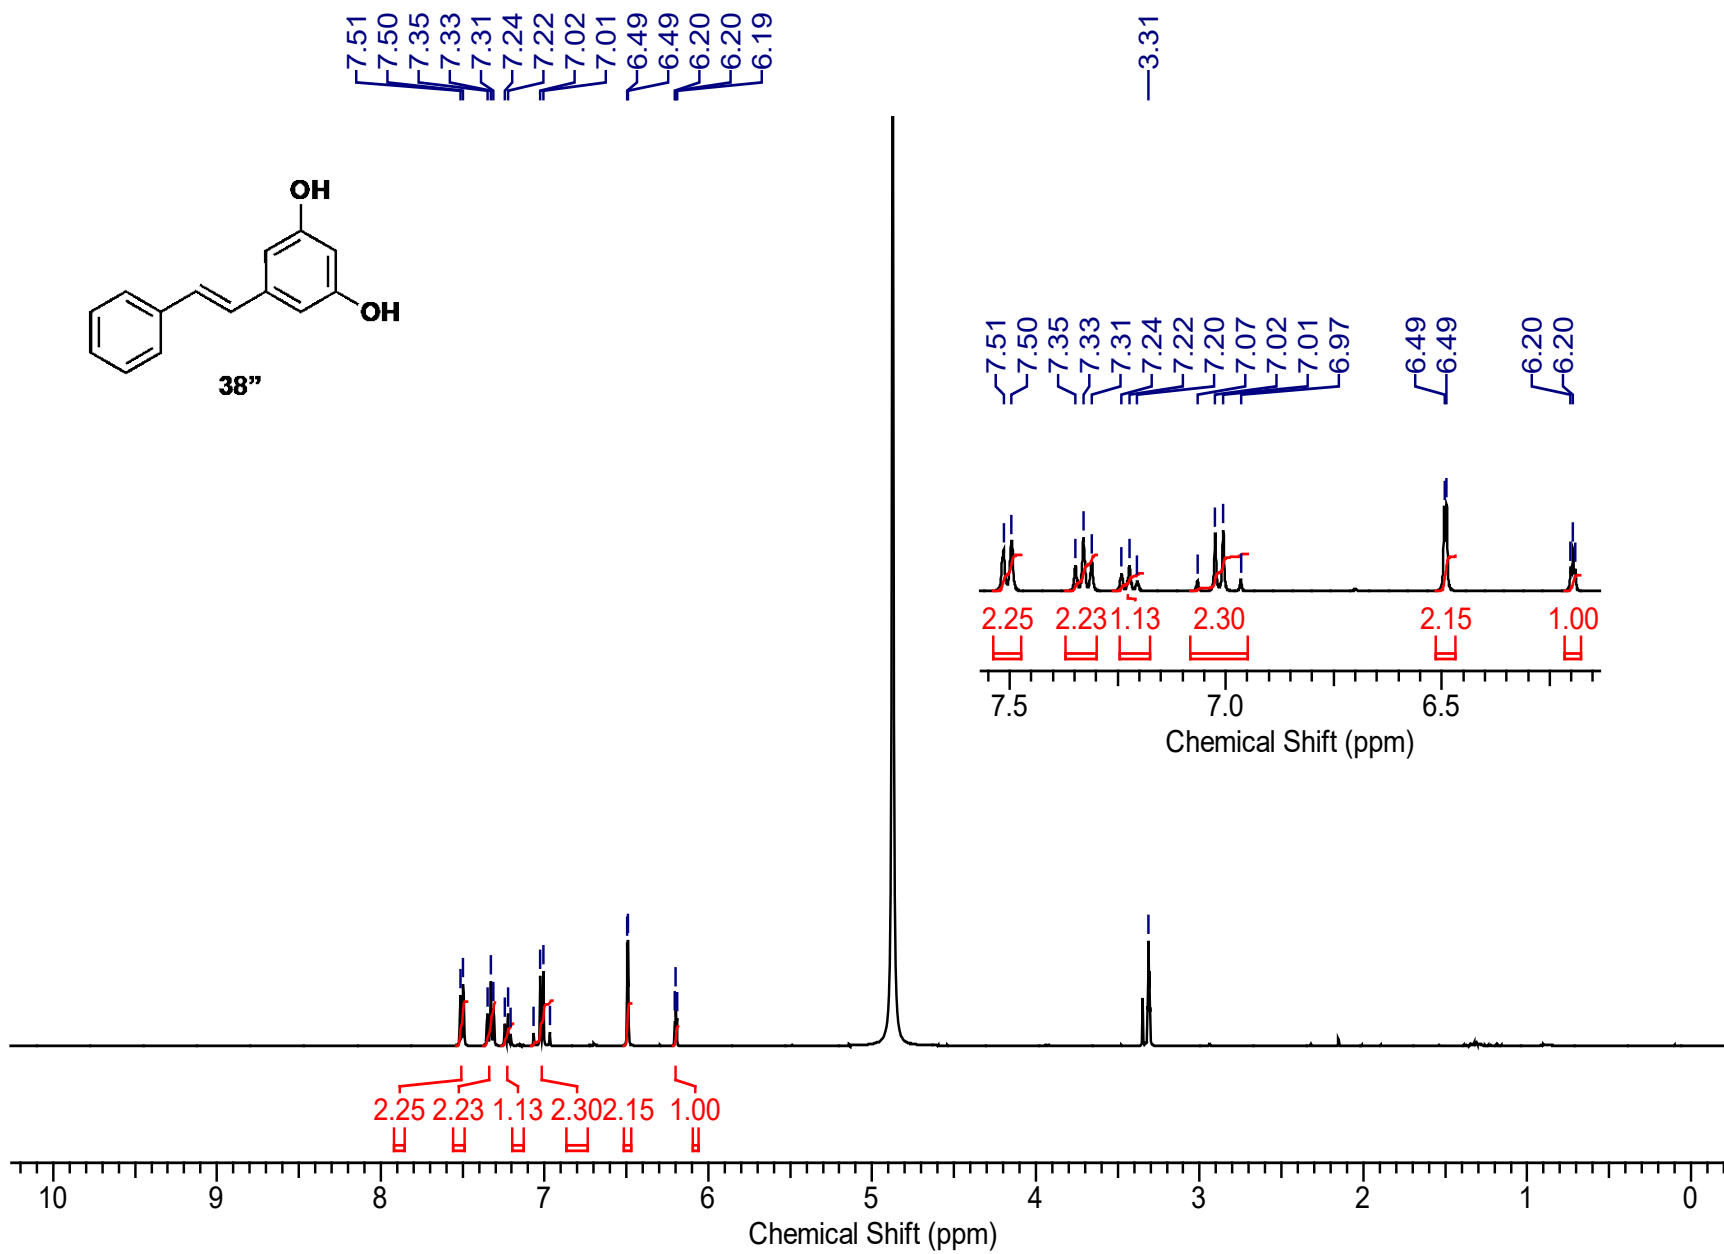

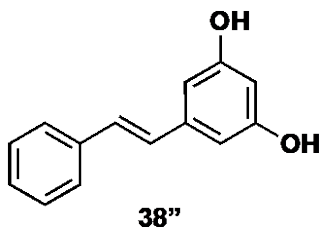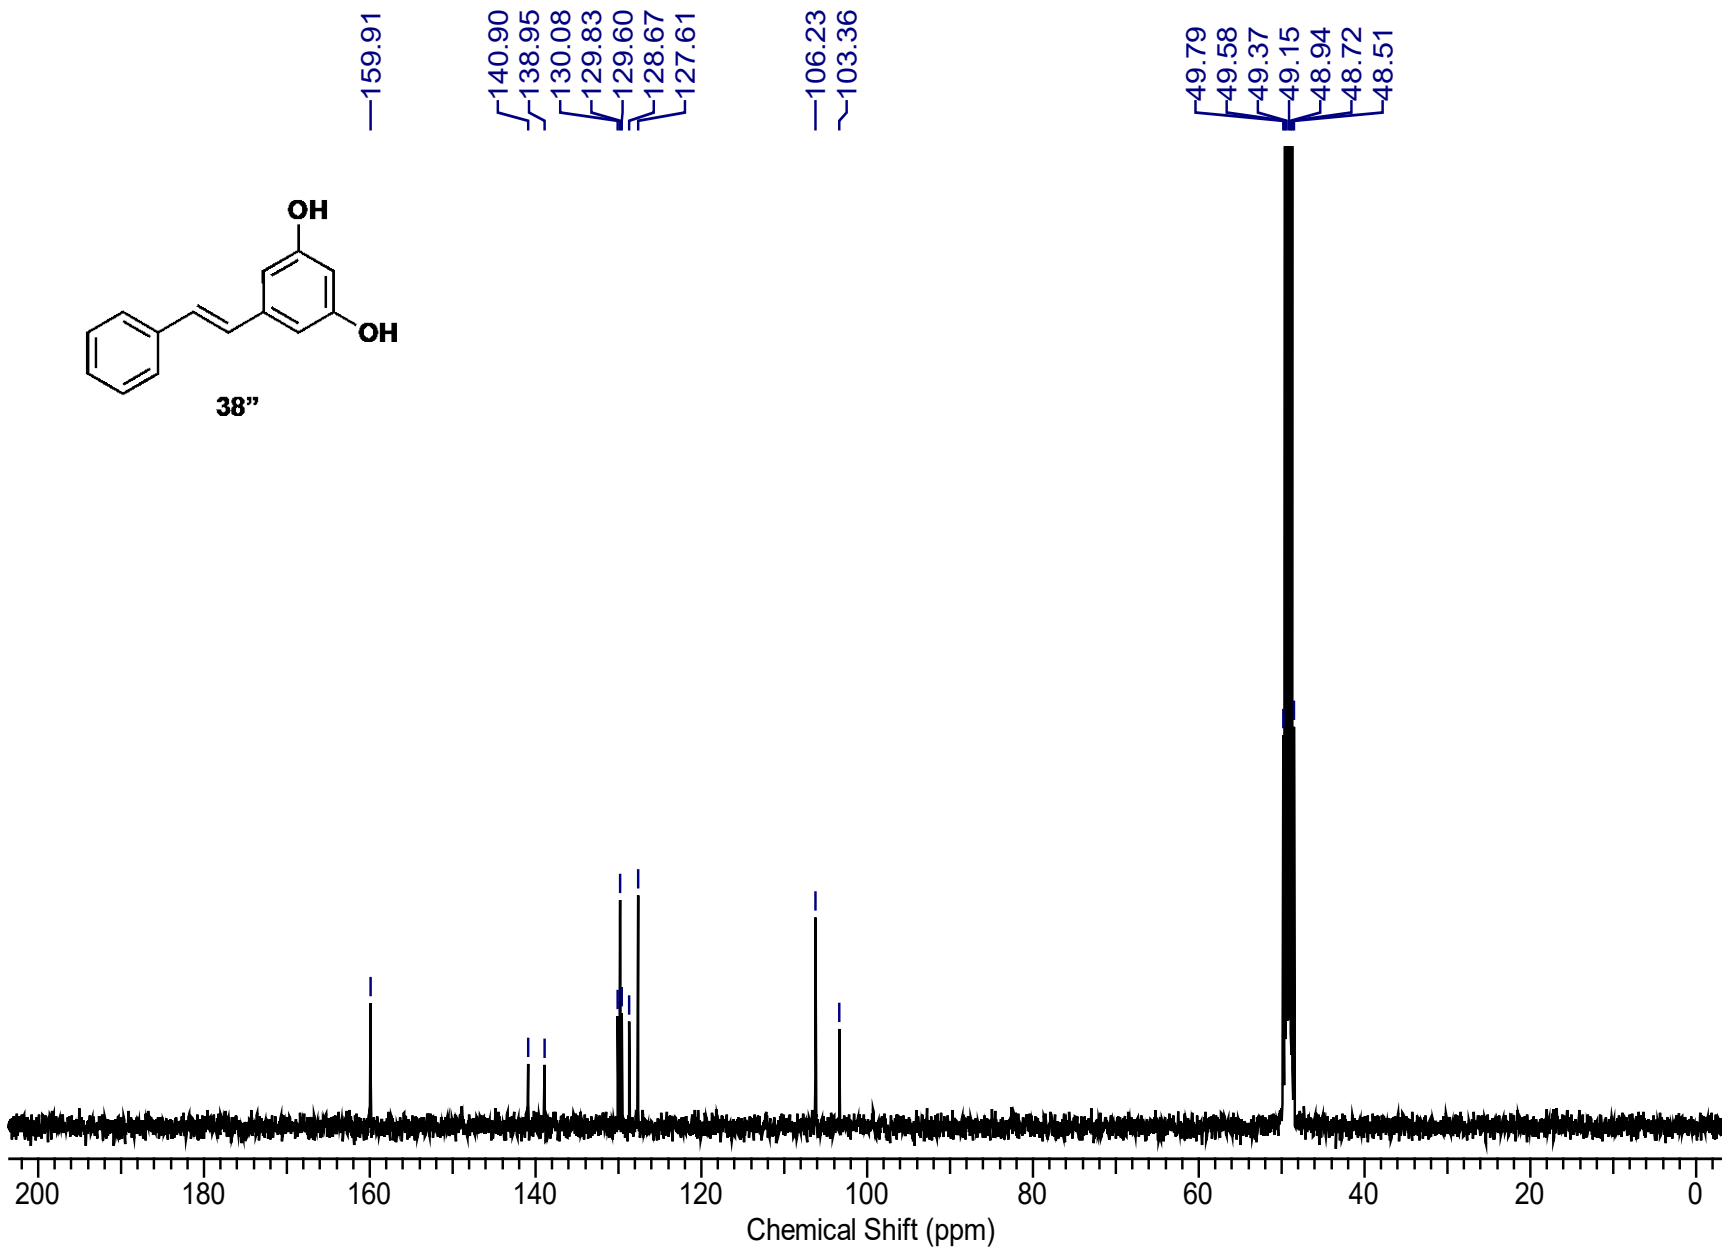

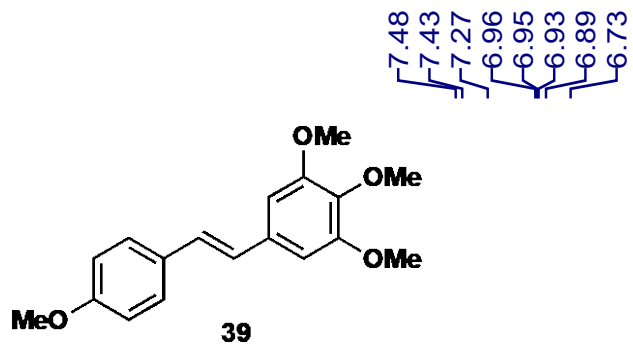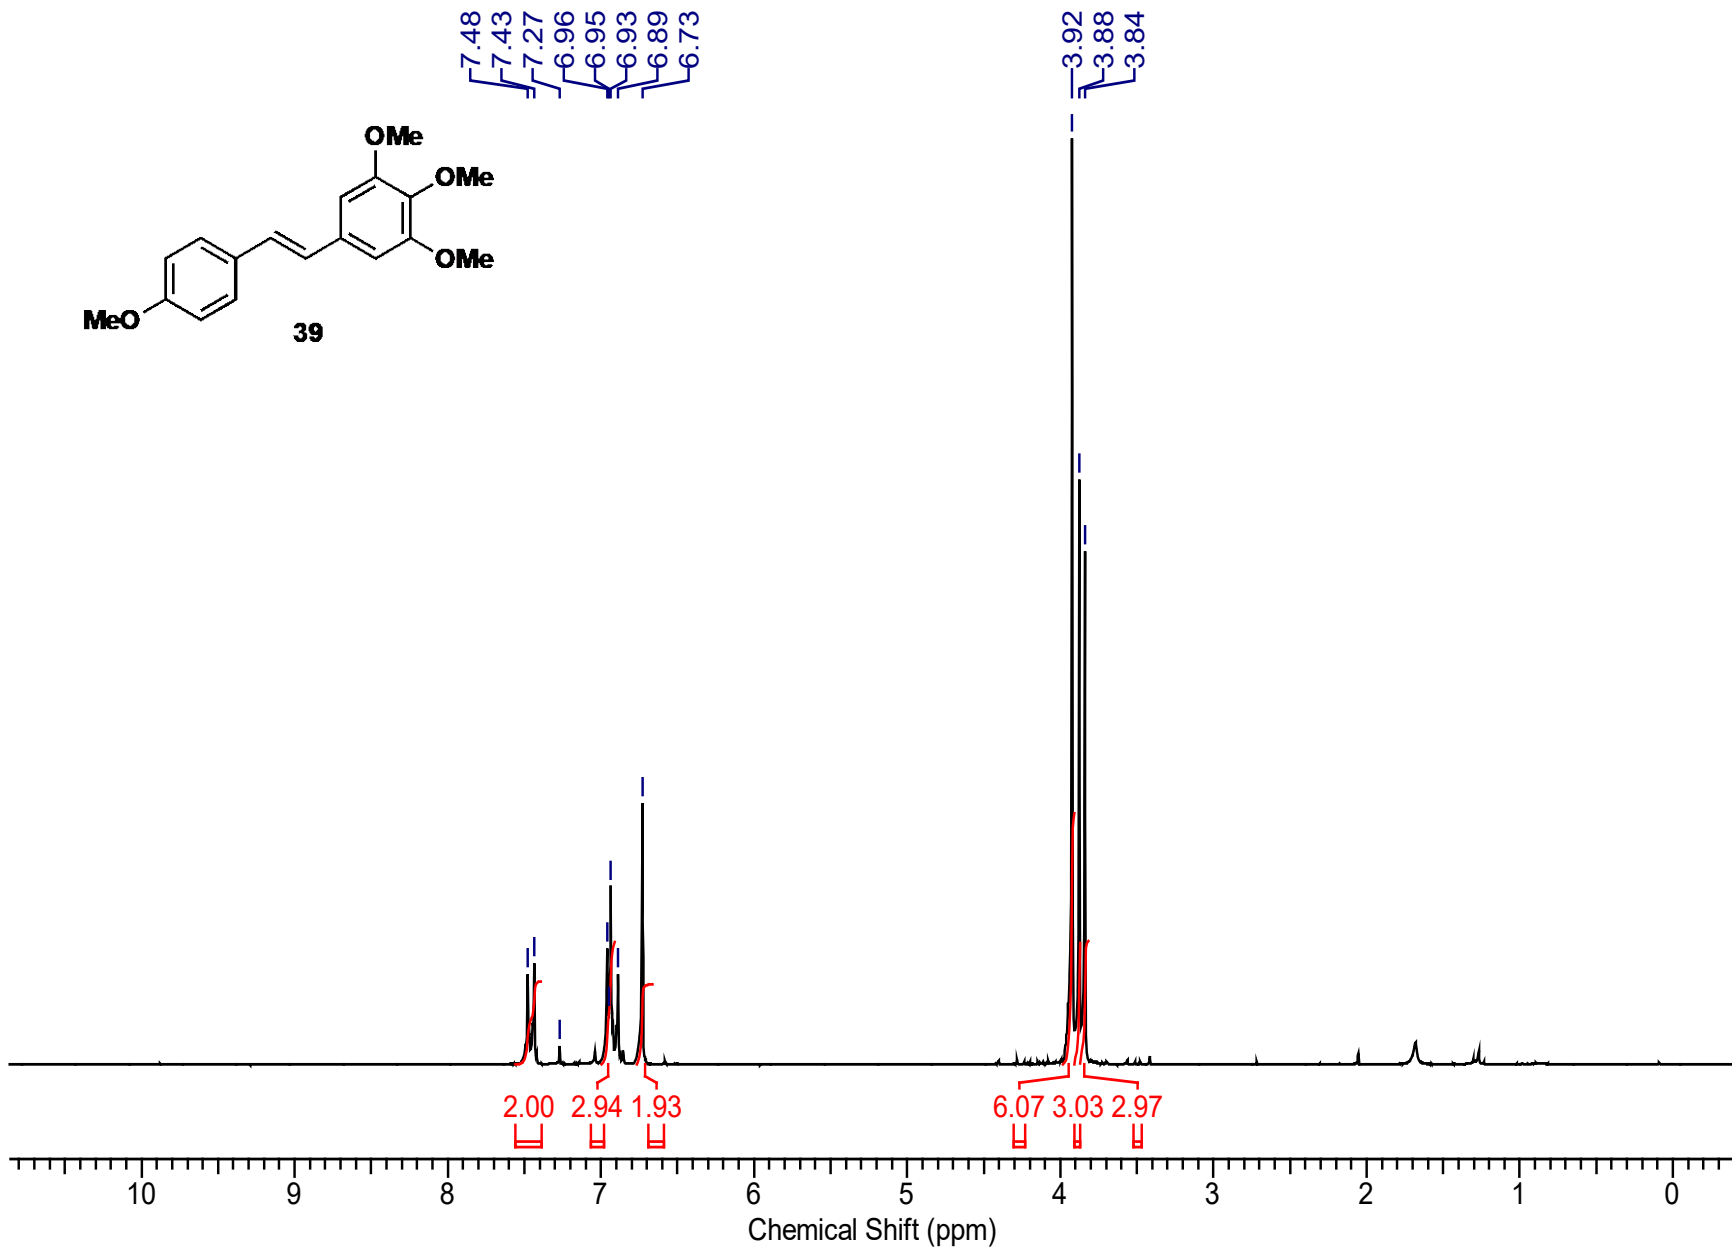

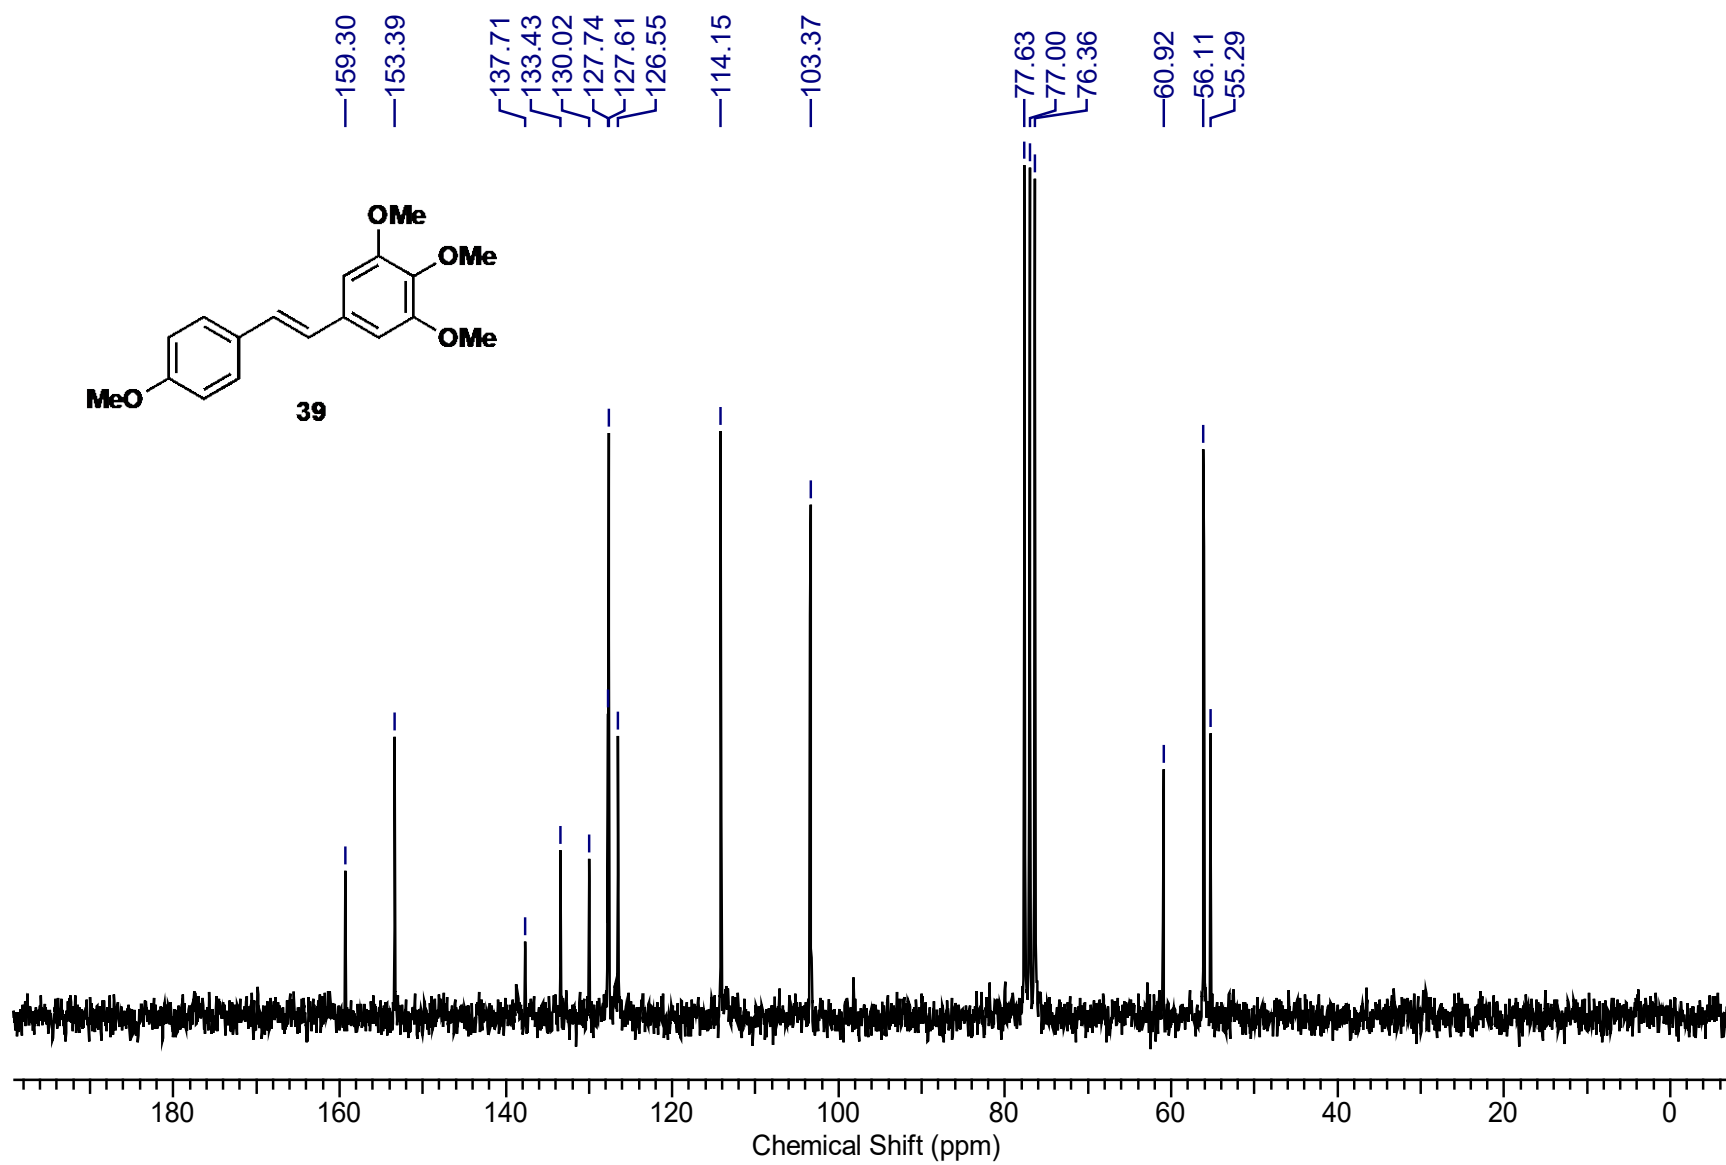

## 9. PBE/TZVP optimized geometries for all the compounds and transition states

### Diphenylacetylene

|   |           |           |           |
|---|-----------|-----------|-----------|
| C | -1.809439 | 0.772982  | -0.395728 |
| C | -1.197654 | 0.680749  | 0.659315  |
| C | -2.529793 | 0.864420  | -1.617085 |
| C | -2.485851 | 2.041894  | -2.398746 |
| C | -3.311379 | -0.225307 | -2.067133 |
| C | -3.203623 | 2.122378  | -3.591551 |
| H | -1.884613 | 2.886960  | -2.060106 |
| C | -4.027616 | -0.132344 | -3.260336 |
| H | -3.351830 | -1.136508 | -1.469700 |
| C | -3.978002 | 1.038610  | -4.027516 |
| H | -3.161024 | 3.037665  | -4.185697 |
| H | -4.631151 | -0.979653 | -3.592979 |
| H | -4.539593 | 1.106572  | -4.961244 |
| C | -0.487947 | 0.562369  | 1.886180  |
| C | -0.055985 | -0.703810 | 2.345026  |
| C | -0.206496 | 1.704680  | 2.669554  |
| C | 0.632426  | -0.816984 | 3.553361  |
| H | -0.266510 | -1.590649 | 1.744637  |
| C | 0.479713  | 1.578249  | 3.877232  |
| H | -0.536166 | 2.685999  | 2.321870  |
| C | 0.900854  | 0.320133  | 4.324486  |
| H | 0.960721  | -1.800931 | 3.894693  |
| H | 0.686045  | 2.469223  | 4.474343  |
| H | 1.438649  | 0.226846  | 5.269295  |

### Z-stilbene

|   |           |           |           |
|---|-----------|-----------|-----------|
| C | -3.599103 | 0.579378  | 0.201898  |
| C | -2.897335 | 0.174976  | 1.287769  |
| C | -5.045962 | 0.790024  | 0.033218  |
| C | -6.015037 | 0.003685  | 0.690523  |
| C | -5.493332 | 1.768011  | -0.878994 |
| C | -7.376206 | 0.213341  | 0.469488  |
| H | -5.694206 | -0.785102 | 1.372476  |
| C | -6.856981 | 1.986225  | -1.091634 |
| H | -4.757262 | 2.368454  | -1.419965 |
| C | -7.805569 | 1.211770  | -0.414978 |
| H | -8.108948 | -0.411743 | 0.984567  |
| H | -7.179282 | 2.757608  | -1.794453 |
| H | -8.871802 | 1.374415  | -0.584775 |
| C | -3.342004 | -0.040902 | 2.674638  |
| C | -2.728809 | -1.052382 | 3.442224  |
| C | -4.312010 | 0.770824  | 3.298766  |
| C | -3.104507 | -1.278210 | 4.768955  |
| H | -1.954812 | -1.673762 | 2.984157  |



|   |           |           |           |
|---|-----------|-----------|-----------|
| C | -4.678057 | 0.553807  | 4.627300  |
| H | -4.773825 | 1.583969  | 2.736594  |
| C | -4.084312 | -0.477930 | 5.366740  |
| H | -2.624986 | -2.076357 | 5.339679  |
| H | -5.426509 | 1.198239  | 5.093542  |
| H | -4.374882 | -0.647151 | 6.405556  |
| H | -1.829780 | -0.011635 | 1.125481  |
| H | -3.012340 | 0.766140  | -0.704461 |

#### E-stilbene

|   |           |           |           |
|---|-----------|-----------|-----------|
| C | -3.633500 | 0.858631  | 0.319454  |
| C | -2.917205 | -0.219398 | 0.719955  |
| C | -5.088313 | 0.944388  | 0.192978  |
| C | -5.968386 | -0.087261 | 0.592120  |
| C | -5.653402 | 2.117563  | -0.354435 |
| C | -7.346991 | 0.050007  | 0.439784  |
| H | -5.572299 | -1.004581 | 1.032246  |
| C | -7.034807 | 2.253607  | -0.507601 |
| H | -4.990874 | 2.929611  | -0.665170 |
| C | -7.889860 | 1.219543  | -0.111966 |
| H | -8.007489 | -0.759739 | 0.757411  |
| H | -7.444731 | 3.170430  | -0.936634 |
| H | -8.970517 | 1.322342  | -0.228049 |
| H | -3.100844 | 1.774289  | 0.040771  |
| C | -1.462235 | -0.305049 | 0.846204  |
| C | -0.596868 | 0.798255  | 0.666570  |
| C | -0.881618 | -1.552551 | 1.165509  |
| C | 0.783644  | 0.652280  | 0.791856  |
| H | -1.007164 | 1.782559  | 0.432323  |
| C | 0.501715  | -1.697753 | 1.290278  |
| H | -1.533179 | -2.417700 | 1.313751  |
| C | 1.342767  | -0.595757 | 1.102710  |
| H | 1.432200  | 1.519514  | 0.650197  |
| H | 0.924141  | -2.674400 | 1.535726  |
| H | 2.424636  | -0.704527 | 1.200716  |
| H | -3.447552 | -1.144859 | 0.969627  |

#### Complex A

|    |           |           |           |
|----|-----------|-----------|-----------|
| C  | -3.991885 | 0.134585  | 1.722830  |
| C  | -2.852507 | -0.433449 | 1.127304  |
| C  | -1.922250 | -1.117624 | 1.923990  |
| C  | -2.125064 | -1.230574 | 3.301066  |
| C  | -3.257458 | -0.661648 | 3.891308  |
| C  | -4.192256 | 0.016093  | 3.100373  |
| P  | -2.515828 | -0.249442 | -0.675261 |
| Ni | -0.436098 | -0.726029 | -1.133219 |
| Cl | -1.048842 | -2.886945 | -1.168564 |
| C  | -3.116253 | 1.462127  | -1.082191 |

|    |           |           |           |
|----|-----------|-----------|-----------|
| C  | -2.333039 | 2.585057  | -0.406405 |
| C  | -0.913546 | 2.734380  | -0.951560 |
| P  | 0.234025  | 1.300186  | -0.674740 |
| C  | 0.656409  | 1.314797  | 1.120968  |
| C  | 1.351264  | 0.212496  | 1.649420  |
| C  | 1.666120  | 0.167026  | 3.008236  |
| C  | 1.275017  | 1.209951  | 3.855171  |
| C  | 0.584301  | 2.307784  | 3.334024  |
| C  | 0.278419  | 2.365747  | 1.970746  |
| C  | 1.724191  | 1.921299  | -1.567936 |
| C  | 2.859177  | 2.372648  | -0.883791 |
| C  | 3.947138  | 2.882363  | -1.601651 |
| C  | 3.902929  | 2.944164  | -2.997465 |
| C  | 2.766524  | 2.492926  | -3.680751 |
| C  | 1.681231  | 1.978860  | -2.969762 |
| C  | -3.768656 | -1.259080 | -1.577650 |
| C  | -4.692665 | -2.070503 | -0.907592 |
| C  | -5.640841 | -2.795102 | -1.637752 |
| C  | -5.666463 | -2.715839 | -3.033478 |
| C  | -4.738216 | -1.909328 | -3.703252 |
| C  | -3.789797 | -1.184020 | -2.979313 |
| H  | -0.415535 | 3.625305  | -0.540911 |
| H  | -2.323224 | 2.437322  | 0.684656  |
| H  | -3.069348 | 1.555773  | -2.178268 |
| Cl | 1.674060  | -1.276025 | -1.652159 |
| H  | -1.039103 | -1.558612 | 1.459610  |
| H  | -4.730958 | 0.667944  | 1.122081  |
| H  | -1.390156 | -1.755563 | 3.913974  |
| H  | -5.079511 | 0.459322  | 3.556596  |
| H  | -3.413510 | -0.745114 | 4.968712  |
| H  | -4.673722 | -2.144195 | 0.180767  |
| H  | -3.056090 | -0.574101 | -3.512146 |
| H  | -6.358772 | -3.426630 | -1.110671 |
| H  | -4.749296 | -1.848163 | -4.793266 |
| H  | -6.406094 | -3.284536 | -3.600440 |
| H  | 1.641437  | -0.608885 | 0.990598  |
| H  | -0.252932 | 3.236715  | 1.586446  |
| H  | 2.206984  | -0.692657 | 3.408504  |
| H  | 0.279103  | 3.126251  | 3.988781  |
| H  | 1.508764  | 1.167099  | 4.920736  |
| H  | 2.901604  | 2.325679  | 0.205646  |
| H  | 0.808730  | 1.603078  | -3.510298 |
| H  | 4.831852  | 3.230183  | -1.064465 |
| H  | 2.729130  | 2.533907  | -4.771073 |
| H  | 4.753977  | 3.340668  | -3.554726 |
| H  | -4.179655 | 1.501067  | -0.805603 |
| H  | -2.865096 | 3.532579  | -0.583542 |
| H  | -0.939635 | 2.869110  | -2.044461 |

Complex B

|    |           |           |           |
|----|-----------|-----------|-----------|
| C  | -3.214220 | -0.132446 | 2.080288  |
| C  | -2.548246 | -0.841692 | 1.069183  |
| C  | -1.869555 | -2.029944 | 1.392324  |
| C  | -1.862376 | -2.500202 | 2.706237  |
| C  | -2.515891 | -1.782246 | 3.714335  |
| C  | -3.192319 | -0.600904 | 3.398182  |
| P  | -2.483601 | -0.255248 | -0.681537 |
| Ni | -0.447683 | -0.388393 | -1.500460 |
| O  | 1.264628  | -0.404610 | -2.283321 |
| C  | 2.260908  | -1.142249 | -1.620943 |
| C  | -3.290355 | 1.423667  | -0.682568 |
| C  | -2.479216 | 2.570130  | -0.074185 |
| C  | -1.213527 | 2.916126  | -0.858999 |
| P  | 0.088355  | 1.587136  | -0.803748 |
| C  | 0.575103  | 1.523260  | 0.976152  |
| C  | 0.761940  | 0.270376  | 1.578095  |
| C  | 1.094790  | 0.179570  | 2.931930  |
| C  | 1.246566  | 1.342584  | 3.692304  |
| C  | 1.069818  | 2.596938  | 3.095517  |
| C  | 0.734760  | 2.690415  | 1.742404  |
| C  | 1.498563  | 2.371150  | -1.690114 |
| C  | 2.750384  | 2.534921  | -1.082685 |
| C  | 3.799708  | 3.128904  | -1.791822 |
| C  | 3.605133  | 3.560778  | -3.106816 |
| C  | 2.355506  | 3.393604  | -3.716413 |
| C  | 1.306951  | 2.797118  | -3.014473 |
| C  | -3.783485 | -1.219875 | -1.573858 |
| C  | -3.813333 | -1.150637 | -2.975390 |
| C  | -4.819641 | -1.806344 | -3.687249 |
| C  | -5.795034 | -2.544702 | -3.005262 |
| C  | -5.762790 | -2.619365 | -1.609437 |
| C  | -4.760347 | -1.956460 | -0.891691 |
| H  | -0.757086 | 3.840046  | -0.475344 |
| H  | -2.221458 | 2.354619  | 0.974853  |
| H  | -3.500034 | 1.631081  | -1.744111 |
| H  | -1.347285 | -2.580592 | 0.606459  |
| H  | -3.756775 | 0.786860  | 1.857852  |
| H  | -1.333153 | -3.424704 | 2.946039  |
| H  | -3.707890 | -0.037243 | 4.178281  |
| H  | -2.498747 | -2.144142 | 4.744361  |
| H  | -3.038084 | -0.597827 | -3.511256 |
| H  | -4.740741 | -2.020143 | 0.197927  |
| H  | -4.836916 | -1.749761 | -4.777525 |
| H  | -6.519005 | -3.196069 | -1.072861 |
| H  | -6.577375 | -3.063499 | -3.562869 |
| H  | 0.627109  | -0.635449 | 0.983255  |
| H  | 0.601518  | 3.675882  | 1.291722  |
| H  | 1.224426  | -0.801442 | 3.392613  |
| H  | 1.189236  | 3.507169  | 3.686381  |

|    |           |           |           |
|----|-----------|-----------|-----------|
| H  | 1.501125  | 1.274261  | 4.751857  |
| H  | 2.911746  | 2.201824  | -0.056185 |
| H  | 0.343446  | 2.652228  | -3.508661 |
| H  | 4.772343  | 3.253850  | -1.311209 |
| H  | 2.198356  | 3.724617  | -4.745075 |
| H  | 4.424790  | 4.026095  | -3.657958 |
| H  | -4.266995 | 1.320834  | -0.186653 |
| H  | -3.122430 | 3.463881  | -0.052657 |
| H  | -1.447121 | 3.087232  | -1.921419 |
| H  | 3.146012  | -1.212774 | -2.283406 |
| H  | 2.605958  | -0.657435 | -0.681356 |
| H  | 1.945726  | -2.175363 | -1.370642 |
| Cl | -0.752684 | -2.585301 | -1.979233 |

#### Catalyst 1

|    |           |           |           |
|----|-----------|-----------|-----------|
| C  | 3.941499  | 2.955379  | -2.965742 |
| C  | 3.562110  | 3.529912  | -1.746621 |
| C  | 2.464832  | 3.024042  | -1.044048 |
| C  | 1.746921  | 1.930746  | -1.553852 |
| C  | 2.133684  | 1.353810  | -2.771175 |
| C  | 3.224767  | 1.869069  | -3.478434 |
| P  | 0.242419  | 1.293079  | -0.682761 |
| C  | 0.681971  | 1.316649  | 1.112930  |
| C  | 1.291254  | 0.169372  | 1.649104  |
| C  | 1.631378  | 0.117566  | 3.001560  |
| C  | 1.349964  | 1.204587  | 3.837354  |
| C  | 0.738608  | 2.346453  | 3.311297  |
| C  | 0.407294  | 2.406435  | 1.953315  |
| C  | -0.913549 | 2.734356  | -0.938179 |
| C  | -2.314153 | 2.594992  | -0.332015 |
| C  | -3.195335 | 1.534385  | -1.002879 |
| P  | -2.611607 | -0.209330 | -0.704691 |
| C  | -3.912983 | -1.194343 | -1.571354 |
| C  | -4.928459 | -1.884980 | -0.895951 |
| C  | -5.889069 | -2.603161 | -1.617748 |
| C  | -5.841534 | -2.634771 | -3.014877 |
| C  | -4.823113 | -1.952680 | -3.692329 |
| C  | -3.857665 | -1.243746 | -2.974356 |
| Ni | -0.485402 | -0.621388 | -1.214290 |
| C  | -2.903164 | -0.476589 | 1.100568  |
| C  | -2.006105 | -1.310832 | 1.786862  |
| C  | -2.153706 | -1.532120 | 3.158075  |
| C  | -3.195811 | -0.915553 | 3.857790  |
| C  | -4.094471 | -0.083207 | 3.180798  |
| C  | -3.950309 | 0.136780  | 1.807875  |
| H  | -0.410719 | 3.637606  | -0.559881 |
| H  | -2.248400 | 2.399272  | 0.750190  |
| H  | -3.201986 | 1.670712  | -2.095712 |
| H  | 0.980303  | -0.773616 | -1.385058 |

|    |           |           |           |
|----|-----------|-----------|-----------|
| H  | -1.184925 | -1.778418 | 1.238224  |
| H  | -4.660992 | 0.789315  | 1.296697  |
| H  | -1.445465 | -2.176360 | 3.682675  |
| H  | -4.909842 | 0.399927  | 3.723075  |
| H  | -3.307879 | -1.081179 | 4.931314  |
| H  | -4.974117 | -1.867019 | 0.194477  |
| H  | -3.048006 | -0.738061 | -3.506627 |
| H  | -6.676341 | -3.139106 | -1.083340 |
| H  | -4.774669 | -1.982033 | -4.782858 |
| H  | -6.592548 | -3.194566 | -3.575973 |
| H  | 1.481557  | -0.689121 | 1.000438  |
| H  | -0.068361 | 3.308161  | 1.565089  |
| H  | 2.104301  | -0.779175 | 3.406935  |
| H  | 0.514807  | 3.196966  | 3.958389  |
| H  | 1.604399  | 1.160064  | 4.898202  |
| H  | 2.182248  | 3.474790  | -0.089704 |
| H  | 1.582378  | 0.491069  | -3.153779 |
| H  | 4.124078  | 4.372493  | -1.338570 |
| H  | 3.519464  | 1.415313  | -4.426864 |
| H  | 4.799064  | 3.352459  | -3.512666 |
| H  | -4.237032 | 1.623890  | -0.662398 |
| H  | -2.819164 | 3.568676  | -0.433944 |
| H  | -0.979362 | 2.849096  | -2.031890 |
| Cl | -0.707577 | -2.767257 | -1.769230 |

#### Int-1

|    |           |           |           |
|----|-----------|-----------|-----------|
| C  | 0.958400  | -3.895578 | -5.980162 |
| C  | -0.413576 | -3.610850 | -5.981188 |
| C  | -0.940400 | -2.687399 | -5.081293 |
| C  | -0.098191 | -2.029573 | -4.153498 |
| C  | 1.280619  | -2.323845 | -4.160138 |
| C  | 1.799780  | -3.246397 | -5.068882 |
| C  | -0.675739 | -1.096338 | -3.228164 |
| C  | -1.614557 | -0.309641 | -2.882559 |
| C  | -2.902932 | 0.302216  | -3.061828 |
| C  | -3.994662 | -0.503053 | -3.464224 |
| C  | -5.261552 | 0.055114  | -3.636935 |
| C  | -5.469989 | 1.421690  | -3.413888 |
| C  | -4.395434 | 2.228837  | -3.020491 |
| C  | -3.127258 | 1.677115  | -2.839622 |
| Ni | -0.244590 | -0.323559 | -1.387429 |
| P  | -0.778671 | 1.219046  | 0.128004  |
| C  | -0.684640 | 3.012188  | -0.368800 |
| C  | -1.136741 | 4.003279  | 0.520101  |
| C  | -1.070660 | 5.352792  | 0.167111  |
| C  | -0.542964 | 5.730628  | -1.073556 |
| C  | -0.077649 | 4.751785  | -1.955803 |
| C  | -0.149654 | 3.399872  | -1.602787 |
| C  | -2.557265 | 1.083226  | 0.680517  |

|   |           |           |           |
|---|-----------|-----------|-----------|
| C | -3.011102 | -0.273178 | 1.241051  |
| C | -3.055843 | -1.427153 | 0.230696  |
| P | -1.352479 | -1.991404 | -0.257296 |
| C | -1.621446 | -3.486623 | -1.300688 |
| C | -2.873421 | -3.854165 | -1.812948 |
| C | -2.987412 | -4.968104 | -2.653065 |
| C | -1.856181 | -5.718676 | -2.983859 |
| C | -0.604109 | -5.352588 | -2.475983 |
| C | -0.484895 | -4.238976 | -1.644966 |
| C | -0.729949 | -2.713880 | 1.329613  |
| C | 0.393121  | -2.166880 | 1.962956  |
| C | 0.819062  | -2.672038 | 3.197042  |
| C | 0.130993  | -3.729246 | 3.798854  |
| C | -0.985641 | -4.288133 | 3.161798  |
| C | -1.414692 | -3.784336 | 1.931895  |
| C | 0.212164  | 1.265819  | 1.689649  |
| C | 1.611534  | 1.300362  | 1.562549  |
| C | 2.420975  | 1.335965  | 2.699850  |
| C | 1.843591  | 1.330260  | 3.975069  |
| C | 0.452201  | 1.301082  | 4.106075  |
| C | -0.362480 | 1.272692  | 2.969306  |
| H | -2.752347 | 1.875488  | 1.417805  |
| H | -2.393398 | -0.564659 | 2.105520  |
| H | -3.578507 | -1.114850 | -0.686855 |
| H | 0.385227  | 0.824855  | -2.023718 |
| H | 0.939877  | -1.358094 | 1.479936  |
| H | -2.281930 | -4.230797 | 1.439448  |
| H | 1.691546  | -2.233901 | 3.686054  |
| H | -1.522532 | -5.118592 | 3.625024  |
| H | 0.463316  | -4.122636 | 4.761843  |
| H | -3.768110 | -3.282184 | -1.563261 |
| H | 0.497261  | -3.933423 | -1.276030 |
| H | -3.966138 | -5.246105 | -3.049989 |
| H | 0.285748  | -5.924444 | -2.746211 |
| H | -1.947553 | -6.583564 | -3.644031 |
| H | 2.065772  | 1.266982  | 0.570804  |
| H | -1.445017 | 1.253784  | 3.098926  |
| H | 3.507217  | 1.358991  | 2.589577  |
| H | -0.006182 | 1.299560  | 5.097237  |
| H | 2.477096  | 1.348168  | 4.864109  |
| H | -1.530405 | 3.730626  | 1.501532  |
| H | 0.213782  | 2.635377  | -2.295435 |
| H | -1.427804 | 6.112066  | 0.865787  |
| H | 0.341970  | 5.036364  | -2.922705 |
| H | -0.490202 | 6.786165  | -1.347774 |
| H | -3.603156 | -2.279418 | 0.659590  |
| H | -4.030489 | -0.132604 | 1.633665  |
| H | -3.146001 | 1.335629  | -0.215371 |
| H | -6.093014 | -0.583135 | -3.943170 |
| H | -3.836984 | -1.570627 | -3.629105 |

|    |           |           |           |
|----|-----------|-----------|-----------|
| H  | -2.294747 | 2.309037  | -2.528742 |
| H  | -4.548044 | 3.296455  | -2.848294 |
| H  | -6.463271 | 1.854694  | -3.545914 |
| H  | -2.011827 | -2.480416 | -5.071894 |
| H  | 1.918420  | -1.838290 | -3.420017 |
| H  | -1.077705 | -4.119138 | -6.683697 |
| H  | 2.869417  | -3.468015 | -5.061073 |
| H  | 1.367185  | -4.624212 | -6.683337 |
| Cl | 1.957774  | -1.062729 | -0.973066 |

## TS1

|    |           |           |           |
|----|-----------|-----------|-----------|
| C  | -1.902421 | -4.017561 | -2.296576 |
| C  | -2.784607 | -3.353106 | -1.428098 |
| C  | -4.135223 | -3.736062 | -1.394555 |
| C  | -4.594713 | -4.769470 | -2.217428 |
| C  | -3.711845 | -5.428613 | -3.078801 |
| C  | -2.363537 | -5.053430 | -3.112255 |
| P  | -2.099547 | -1.959103 | -0.419965 |
| C  | -3.611842 | -1.003394 | 0.103281  |
| C  | -3.271544 | 0.219261  | 0.966455  |
| C  | -2.634035 | 1.381886  | 0.197483  |
| P  | -0.883195 | 1.098396  | -0.379486 |
| C  | 0.147167  | 1.231170  | 1.159137  |
| C  | -0.356587 | 1.733624  | 2.368966  |
| C  | 0.459230  | 1.787004  | 3.504751  |
| C  | 1.785005  | 1.348640  | 3.441914  |
| C  | 2.294381  | 0.850919  | 2.236554  |
| C  | 1.478505  | 0.782322  | 1.105627  |
| Ni | -0.460856 | -0.748376 | -1.325835 |
| Cl | 1.146703  | -2.396460 | -1.342388 |
| C  | -1.623672 | -2.761420 | 1.184686  |
| C  | -0.472709 | -2.317452 | 1.850473  |
| C  | -0.135590 | -2.840740 | 3.102776  |
| C  | -0.936614 | -3.825567 | 3.689597  |
| C  | -2.079220 | -4.283762 | 3.021519  |
| C  | -2.423184 | -3.753374 | 1.774840  |
| C  | -0.543585 | 2.696248  | -1.258850 |
| C  | -0.676545 | 3.927242  | -0.595863 |
| C  | -0.445629 | 5.122092  | -1.283088 |
| C  | -0.087019 | 5.098282  | -2.636840 |
| C  | 0.047775  | 3.874632  | -3.300169 |
| C  | -0.177774 | 2.678431  | -2.611231 |
| C  | -1.662178 | -0.546351 | -3.656105 |
| C  | -0.533102 | -0.861351 | -4.030791 |
| C  | 0.733111  | -1.193625 | -4.575660 |
| C  | 1.647647  | -0.178881 | -4.938425 |
| C  | 2.884301  | -0.510370 | -5.489450 |
| C  | 3.232466  | -1.852973 | -5.687972 |
| C  | 2.332241  | -2.864906 | -5.332075 |

|   |           |           |           |
|---|-----------|-----------|-----------|
| C | 1.095069  | -2.544302 | -4.776302 |
| C | -3.044810 | -0.208755 | -3.549461 |
| C | -3.456824 | 1.124309  | -3.327206 |
| C | -4.812473 | 1.437673  | -3.235321 |
| C | -5.781625 | 0.434112  | -3.361334 |
| C | -5.383335 | -0.886633 | -3.599093 |
| C | -4.030097 | -1.209852 | -3.698118 |
| H | -2.655850 | 2.304875  | 0.795742  |
| H | -2.634071 | -0.081894 | 1.814479  |
| H | -4.139102 | -0.697368 | -0.813726 |
| H | 0.628198  | 0.210484  | -1.650789 |
| H | 0.159823  | -1.566287 | 1.376167  |
| H | -3.315250 | -4.121550 | 1.262715  |
| H | 0.759781  | -2.481936 | 3.615401  |
| H | -2.703974 | -5.057993 | 3.472042  |
| H | -0.671085 | -4.239343 | 4.664702  |
| H | -4.846290 | -3.223568 | -0.745531 |
| H | -0.854066 | -3.709454 | -2.326522 |
| H | -5.648724 | -5.053420 | -2.189514 |
| H | -1.670474 | -5.562889 | -3.785620 |
| H | -4.073903 | -6.231170 | -3.724759 |
| H | 1.862046  | 0.350669  | 0.178422  |
| H | -1.387047 | 2.081901  | 2.446963  |
| H | 3.326560  | 0.499282  | 2.180229  |
| H | 0.052122  | 2.172454  | 4.441813  |
| H | 2.418264  | 1.389065  | 4.330352  |
| H | -0.941677 | 3.961790  | 0.463199  |
| H | -0.075248 | 1.716041  | -3.116517 |
| H | -0.542610 | 6.075064  | -0.758931 |
| H | 0.327998  | 3.849537  | -4.355258 |
| H | 0.091069  | 6.033626  | -3.171108 |
| H | -4.273708 | -1.677374 | 0.665865  |
| H | -4.208780 | 0.589713  | 1.410689  |
| H | -3.207432 | 1.589304  | -0.718616 |
| H | -6.132172 | -1.674093 | -3.706435 |
| H | -3.720409 | -2.238824 | -3.879755 |
| H | -2.703183 | 1.906206  | -3.226145 |
| H | -5.115043 | 2.472046  | -3.060739 |
| H | -6.841594 | 0.681820  | -3.280503 |
| H | 0.397196  | -3.330639 | -4.488074 |
| H | 1.377322  | 0.867686  | -4.788228 |
| H | 2.600154  | -3.912750 | -5.482198 |
| H | 3.580523  | 0.283154  | -5.768372 |
| H | 4.201474  | -2.108862 | -6.120880 |

#### Int-2

|   |          |          |           |
|---|----------|----------|-----------|
| C | 6.980605 | 6.312291 | -4.501452 |
| C | 6.242220 | 5.736078 | -5.544583 |
| C | 5.794048 | 6.548399 | -6.599909 |



|    |           |           |           |
|----|-----------|-----------|-----------|
| C  | 6.093684  | 7.912987  | -6.616048 |
| C  | 6.833678  | 8.482061  | -5.574100 |
| C  | 7.273423  | 7.679109  | -4.517101 |
| P  | 5.769070  | 3.947642  | -5.555684 |
| Ni | 3.689088  | 3.461373  | -5.204281 |
| C  | 3.654189  | 4.813837  | -3.801171 |
| C  | 3.409597  | 6.115304  | -4.066341 |
| C  | 3.166312  | 7.219279  | -3.124356 |
| C  | 3.470734  | 8.537060  | -3.531262 |
| C  | 3.260125  | 9.626216  | -2.683125 |
| C  | 2.723485  | 9.430125  | -1.404838 |
| C  | 2.394457  | 8.131600  | -0.992779 |
| C  | 2.608050  | 7.042823  | -1.839492 |
| C  | 6.443511  | 3.448472  | -7.229500 |
| C  | 6.403657  | 1.946074  | -7.512407 |
| C  | 5.003613  | 1.418655  | -7.836737 |
| P  | 3.760668  | 1.578258  | -6.460256 |
| C  | 2.229782  | 1.046384  | -7.350611 |
| C  | 1.669433  | -0.227975 | -7.194683 |
| C  | 0.528690  | -0.586304 | -7.922245 |
| C  | -0.052184 | 0.322016  | -8.812093 |
| C  | 0.506884  | 1.596355  | -8.970125 |
| C  | 1.637273  | 1.960571  | -8.236378 |
| C  | 4.136272  | 0.193379  | -5.294922 |
| C  | 5.151296  | -0.748538 | -5.517746 |
| C  | 5.435114  | -1.718977 | -4.550201 |
| C  | 4.706305  | -1.760298 | -3.357899 |
| C  | 3.682667  | -0.830970 | -3.136428 |
| C  | 3.402975  | 0.143532  | -4.095690 |
| C  | 6.954282  | 3.097878  | -4.420188 |
| C  | 6.462503  | 2.183093  | -3.480146 |
| C  | 7.343259  | 1.460848  | -2.670914 |
| C  | 8.721733  | 1.653854  | -2.791339 |
| C  | 9.220346  | 2.568746  | -3.727952 |
| C  | 8.342203  | 3.287589  | -4.541588 |
| C  | 3.934297  | 4.242536  | -2.471205 |
| C  | 3.214719  | 3.148901  | -1.945397 |
| C  | 3.565885  | 2.580146  | -0.719834 |
| C  | 4.651246  | 3.079489  | 0.009731  |
| C  | 5.371646  | 4.169249  | -0.494145 |
| C  | 5.017821  | 4.742903  | -1.714574 |
| H  | 5.034320  | 0.367292  | -8.159504 |
| H  | 6.847740  | 1.392062  | -6.669672 |
| H  | 5.876324  | 4.000829  | -7.994104 |
| H  | 5.386712  | 2.034121  | -3.381962 |
| H  | 8.744333  | 3.996461  | -5.268876 |
| H  | 6.945918  | 0.749162  | -1.944687 |
| H  | 10.296960 | 2.722236  | -3.825830 |
| H  | 9.411612  | 1.090932  | -2.159106 |
| H  | 5.194750  | 6.125462  | -7.409310 |

|    |           |           |           |
|----|-----------|-----------|-----------|
| H  | 7.332871  | 5.695058  | -3.674074 |
| H  | 5.739807  | 8.533630  | -7.441740 |
| H  | 7.848236  | 8.116207  | -3.698003 |
| H  | 7.062032  | 9.549578  | -5.583244 |
| H  | 2.615816  | 0.878971  | -3.917900 |
| H  | 5.733101  | -0.736708 | -6.439916 |
| H  | 3.108781  | -0.856159 | -2.207958 |
| H  | 6.232696  | -2.442278 | -4.731167 |
| H  | 4.934963  | -2.514447 | -2.602280 |
| H  | 2.117993  | -0.944710 | -6.504105 |
| H  | 2.051447  | 2.966412  | -8.342292 |
| H  | 0.095392  | -1.580285 | -7.791746 |
| H  | 0.053939  | 2.312464  | -9.659009 |
| H  | -0.941324 | 0.040248  | -9.379901 |
| H  | 7.478397  | 3.819346  | -7.259759 |
| H  | 7.049629  | 1.745964  | -8.381830 |
| H  | 4.573272  | 1.990608  | -8.673893 |
| H  | 2.992318  | 1.733628  | -0.334709 |
| H  | 2.369850  | 2.759047  | -2.514236 |
| H  | 5.580412  | 5.592372  | -2.104903 |
| H  | 6.220039  | 4.570809  | 0.065293  |
| H  | 4.933747  | 2.623463  | 0.960996  |
| H  | 3.896802  | 8.695747  | -4.525374 |
| H  | 2.333357  | 6.040339  | -1.509441 |
| H  | 3.514240  | 10.633587 | -3.021486 |
| H  | 1.957290  | 7.968131  | -0.004692 |
| H  | 2.553438  | 10.279787 | -0.740222 |
| H  | 3.402856  | 6.426491  | -5.117250 |
| Cl | 1.436765  | 3.263630  | -4.966758 |

## TS2

|    |           |           |           |
|----|-----------|-----------|-----------|
| C  | -0.016620 | 0.583488  | -5.998941 |
| C  | -0.760729 | -0.449847 | -5.382485 |
| C  | -1.542916 | -1.279595 | -6.216127 |
| C  | -1.555803 | -1.093436 | -7.599284 |
| C  | -0.798063 | -0.074066 | -8.193572 |
| C  | -0.029668 | 0.768208  | -7.381458 |
| C  | -0.700011 | -0.538993 | -3.919116 |
| C  | -1.138483 | -1.447002 | -3.010499 |
| C  | -1.574380 | -2.822540 | -3.215247 |
| C  | -2.661787 | -3.361861 | -2.496147 |
| C  | -3.043105 | -4.692293 | -2.665304 |
| C  | -2.334038 | -5.527897 | -3.536483 |
| C  | -1.237458 | -5.016367 | -4.241194 |
| C  | -0.859167 | -3.684529 | -4.079149 |
| Ni | -1.122723 | -0.376819 | -1.385008 |
| Cl | -3.358563 | 0.031873  | -1.592534 |
| P  | 0.479312  | -1.516615 | -0.499753 |
| C  | 0.065977  | -3.311479 | -0.298552 |

|   |           |           |           |
|---|-----------|-----------|-----------|
| C | 0.810630  | -4.336418 | -0.897204 |
| C | 0.446536  | -5.672944 | -0.703031 |
| C | -0.653735 | -5.995760 | 0.095491  |
| C | -1.403269 | -4.975042 | 0.690724  |
| C | -1.054896 | -3.639746 | 0.483783  |
| C | 2.159429  | -1.489507 | -1.273070 |
| C | 3.316312  | -1.177022 | -0.541292 |
| C | 4.554971  | -1.086979 | -1.184059 |
| C | 4.656196  | -1.317742 | -2.558887 |
| C | 3.510482  | -1.645513 | -3.291761 |
| C | 2.270588  | -1.724631 | -2.655473 |
| C | 0.758371  | -1.080031 | 1.300658  |
| C | 1.033141  | 0.383791  | 1.663358  |
| C | -0.179755 | 1.311783  | 1.524880  |
| P | -0.655813 | 1.514424  | -0.262114 |
| C | -1.962462 | 2.813856  | -0.275539 |
| C | -2.944959 | 2.866883  | 0.723962  |
| C | -3.986297 | 3.795844  | 0.636606  |
| C | -4.063477 | 4.669103  | -0.453025 |
| C | -3.093025 | 4.609432  | -1.459412 |
| C | -2.050648 | 3.684586  | -1.373490 |
| C | 0.823402  | 2.415229  | -0.932077 |
| C | 1.197611  | 3.662243  | -0.400423 |
| C | 2.333725  | 4.318020  | -0.879476 |
| C | 3.109583  | 3.737286  | -1.891715 |
| C | 2.744976  | 2.497127  | -2.421359 |
| C | 1.605503  | 1.842547  | -1.942883 |
| H | 3.997608  | 4.252525  | -2.263410 |
| H | 2.615515  | 5.287024  | -0.462396 |
| H | 0.597169  | 4.130367  | 0.382803  |
| H | -3.146507 | 5.285493  | -2.315537 |
| H | -1.298860 | 3.645787  | -2.165037 |
| H | 3.346702  | 2.031219  | -3.204335 |
| H | 1.334238  | 0.866757  | -2.345427 |
| H | 5.443894  | -0.831927 | -0.603861 |
| H | 5.623993  | -1.241385 | -3.058437 |
| H | -2.148957 | -2.070601 | -5.773482 |
| H | -2.170695 | -1.746454 | -8.223036 |
| H | -0.814089 | 0.067532  | -9.275991 |
| H | 0.556970  | 1.576036  | -7.825064 |
| H | 0.577691  | 1.252557  | -5.369616 |
| H | -0.256409 | 0.378059  | -3.496611 |
| H | 3.269592  | -0.994642 | 0.532176  |
| H | -4.879229 | 5.391819  | -0.520502 |
| H | 0.037805  | 2.302310  | 1.950244  |
| H | -4.743332 | 3.833284  | 1.422802  |
| H | 1.357809  | 0.404564  | 2.715653  |
| H | -2.911110 | 2.183200  | 1.574267  |
| H | -1.045748 | 0.893561  | 2.059781  |
| H | -0.152936 | -1.420675 | 1.815503  |

|   |           |           |           |
|---|-----------|-----------|-----------|
| H | 1.676444  | -4.098286 | -1.516477 |
| H | -3.196876 | -2.708831 | -1.804857 |
| H | 0.000517  | -3.295082 | -4.628530 |
| H | -0.667613 | -5.662943 | -4.912642 |
| H | -2.624435 | -6.573972 | -3.654645 |
| H | -3.885733 | -5.089406 | -2.094674 |
| H | -0.933236 | -7.040262 | 0.247145  |
| H | -2.272097 | -5.218011 | 1.305750  |
| H | -1.671817 | -2.851371 | 0.922390  |
| H | 1.028353  | -6.463799 | -1.180727 |
| H | 1.376699  | -1.946415 | -3.238256 |
| H | 3.578896  | -1.832317 | -4.365460 |
| H | 1.876069  | 0.784653  | 1.078361  |
| H | 1.572447  | -1.731150 | 1.653267  |

### Int-3

|    |           |           |           |
|----|-----------|-----------|-----------|
| C  | -3.453530 | -1.739705 | -5.152362 |
| C  | -3.856917 | -0.645422 | -4.360312 |
| C  | -5.221163 | -0.528193 | -4.022315 |
| C  | -6.156497 | -1.452678 | -4.491111 |
| C  | -5.745188 | -2.524575 | -5.291970 |
| C  | -4.389833 | -2.665987 | -5.613154 |
| C  | -2.894277 | 0.376682  | -3.930976 |
| C  | -2.597982 | 1.488135  | -4.669428 |
| C  | -3.216375 | 2.025765  | -5.893095 |
| C  | -4.119869 | 1.345364  | -6.741474 |
| C  | -4.646732 | 1.967550  | -7.875346 |
| C  | -4.298728 | 3.285232  | -8.198638 |
| C  | -3.402836 | 3.975686  | -7.373413 |
| C  | -2.869554 | 3.352613  | -6.244913 |
| Ni | -2.381925 | 0.716287  | -2.092443 |
| Cl | -0.288354 | 1.734725  | -2.368484 |
| P  | -3.006529 | 1.973193  | -0.323369 |
| C  | -3.185335 | 3.675574  | -1.027796 |
| C  | -2.671170 | 4.816382  | -0.395463 |
| C  | -2.821528 | 6.073926  | -0.990367 |
| C  | -3.481937 | 6.201190  | -2.216743 |
| C  | -3.998277 | 5.064247  | -2.849365 |
| C  | -3.850246 | 3.807511  | -2.259536 |
| C  | -2.054870 | 2.190186  | 1.238154  |
| C  | -0.673677 | 2.437622  | 1.138788  |
| C  | 0.099337  | 2.580199  | 2.291798  |
| C  | -0.490676 | 2.457561  | 3.554859  |
| C  | -1.861262 | 2.203516  | 3.658745  |
| C  | -2.644066 | 2.075242  | 2.506674  |
| C  | -4.757362 | 1.585936  | 0.180231  |
| C  | -4.998966 | 0.150881  | 0.663934  |
| C  | -4.856676 | -0.935740 | -0.408880 |
| P  | -3.149439 | -1.058553 | -1.131759 |

|   |           |           |           |
|---|-----------|-----------|-----------|
| C | -3.097308 | -2.681099 | -2.009954 |
| C | -1.848517 | -3.105592 | -2.493595 |
| C | -1.722129 | -4.345841 | -3.118097 |
| C | -2.842306 | -5.172481 | -3.267860 |
| C | -4.086797 | -4.748770 | -2.794846 |
| C | -4.218102 | -3.506021 | -2.167031 |
| O | -0.102628 | -0.973344 | -4.555272 |
| C | 0.374460  | -0.054398 | -5.544830 |
| C | -2.067615 | -1.430077 | 0.332048  |
| C | -0.776072 | -0.889673 | 0.398795  |
| C | 0.054657  | -1.187709 | 1.482872  |
| C | -0.399507 | -2.023227 | 2.506701  |
| C | -1.685380 | -2.573062 | 2.438790  |
| C | -2.516070 | -2.284081 | 1.353512  |
| H | -0.972676 | -2.460545 | -2.391703 |
| H | -4.967026 | -5.382362 | -2.920821 |
| H | -2.745293 | -6.142632 | -3.759393 |
| H | -0.748108 | -4.665840 | -3.493564 |
| H | -5.201154 | -3.188358 | -1.819729 |
| H | -5.536619 | -0.747627 | -1.253500 |
| H | -5.128968 | -1.911952 | 0.017742  |
| H | -6.027816 | 0.096911  | 1.052800  |
| H | -4.339343 | -0.084556 | 1.513531  |
| H | -3.511726 | -2.730903 | 1.312132  |
| H | -2.044669 | -3.229665 | 3.233866  |
| H | 0.246331  | -2.247673 | 3.357970  |
| H | 1.054226  | -0.751648 | 1.531978  |
| H | -0.430210 | -0.214712 | -0.389136 |
| H | -0.209217 | 2.501629  | 0.151824  |
| H | -3.713050 | 1.889388  | 2.614737  |
| H | -2.329394 | 2.107894  | 4.640656  |
| H | 0.116888  | 2.559095  | 4.456372  |
| H | 1.170032  | 2.775558  | 2.202927  |
| H | -5.070786 | 2.314868  | 0.942512  |
| H | -1.818061 | 2.148042  | -4.279410 |
| H | -4.231292 | 2.922253  | -2.774961 |
| H | -4.509053 | 5.152257  | -3.810280 |
| H | -3.592716 | 7.183674  | -2.679913 |
| H | -2.418644 | 6.957309  | -0.490467 |
| H | -2.151912 | 4.729118  | 0.560175  |
| H | -5.338117 | 1.414729  | -8.515689 |
| H | -4.717656 | 3.765735  | -9.085088 |
| H | -3.117397 | 5.003018  | -7.611078 |
| H | -2.170482 | 3.898773  | -5.606123 |
| H | -5.545322 | 0.324082  | -3.420275 |
| H | -2.394899 | -1.847036 | -5.397155 |
| H | -4.058738 | -3.509679 | -6.222512 |
| H | -6.475122 | -3.251199 | -5.654313 |
| H | -5.359670 | 1.790838  | -0.718981 |
| H | -7.211314 | -1.334618 | -4.232544 |

|   |           |           |           |
|---|-----------|-----------|-----------|
| H | -4.407528 | 0.319395  | -6.519307 |
| H | 1.101237  | -0.593416 | -6.168137 |
| H | 0.868835  | 0.819001  | -5.086251 |
| H | -0.442869 | 0.312361  | -6.191060 |
| H | -0.747997 | -0.478107 | -4.002426 |

TS3

|    |           |           |           |
|----|-----------|-----------|-----------|
| C  | -3.921362 | -1.463912 | -5.478693 |
| C  | -3.899505 | -0.456426 | -4.487699 |
| C  | -5.100629 | -0.230859 | -3.778174 |
| C  | -6.266114 | -0.945722 | -4.054922 |
| C  | -6.269287 | -1.931059 | -5.051204 |
| C  | -5.086260 | -2.181074 | -5.758855 |
| C  | -2.667932 | 0.275362  | -4.173700 |
| C  | -2.363945 | 1.505240  | -4.679322 |
| C  | -3.125948 | 2.451689  | -5.510218 |
| C  | -4.367909 | 2.190787  | -6.133179 |
| C  | -5.033122 | 3.185897  | -6.851900 |
| C  | -4.482205 | 4.467814  | -6.979458 |
| C  | -3.246168 | 4.741499  | -6.383200 |
| C  | -2.581287 | 3.746727  | -5.667962 |
| Ni | -1.945726 | 0.429829  | -2.028007 |
| Cl | -0.251097 | 1.956111  | -2.072584 |
| P  | -3.053586 | 1.773698  | -0.737552 |
| C  | -3.474118 | 3.334925  | -1.631150 |
| C  | -2.590515 | 4.425589  | -1.578394 |
| C  | -2.900605 | 5.612123  | -2.244808 |
| C  | -4.084640 | 5.718450  | -2.982439 |
| C  | -4.958411 | 4.631288  | -3.051710 |
| C  | -4.653720 | 3.443050  | -2.383948 |
| C  | -2.272754 | 2.336630  | 0.841373  |
| C  | -1.102239 | 1.722690  | 1.300857  |
| C  | -0.564318 | 2.076684  | 2.541981  |
| C  | -1.188248 | 3.054825  | 3.322335  |
| C  | -2.352063 | 3.681533  | 2.858801  |
| C  | -2.896518 | 3.323417  | 1.623295  |
| C  | -4.707058 | 1.181547  | -0.122257 |
| C  | -4.626519 | -0.133682 | 0.653450  |
| C  | -4.364518 | -1.344229 | -0.246839 |
| P  | -2.692632 | -1.370459 | -1.046463 |
| C  | -2.725088 | -2.960190 | -1.993908 |
| C  | -1.573810 | -3.762764 | -2.058146 |
| C  | -1.599030 | -4.975991 | -2.746819 |
| C  | -2.769027 | -5.397736 | -3.390026 |
| C  | -3.911232 | -4.595157 | -3.341447 |
| C  | -3.890463 | -3.378445 | -2.653253 |
| O  | -0.626228 | -1.116167 | -3.152413 |
| C  | 0.664091  | -0.783525 | -3.658673 |
| C  | -1.497774 | -1.712299 | 0.328508  |

|   |           |           |           |
|---|-----------|-----------|-----------|
| C | -0.132190 | -1.458919 | 0.108539  |
| C | 0.801437  | -1.693363 | 1.119708  |
| C | 0.379968  | -2.161773 | 2.369448  |
| C | -0.976928 | -2.409995 | 2.595381  |
| C | -1.913688 | -2.195384 | 1.578458  |
| H | -0.655168 | -3.441922 | -1.568804 |
| H | -4.825261 | -4.903292 | -3.852484 |
| H | -2.786595 | -6.346519 | -3.930440 |
| H | -0.698912 | -5.593237 | -2.783310 |
| H | -4.787926 | -2.759952 | -2.657684 |
| H | -5.092184 | -1.358555 | -1.072107 |
| H | -4.488649 | -2.288264 | 0.303001  |
| H | -5.588995 | -0.292794 | 1.163122  |
| H | -3.866807 | -0.062468 | 1.448994  |
| H | -2.964778 | -2.406086 | 1.778575  |
| H | -1.313948 | -2.773400 | 3.568264  |
| H | 1.107394  | -2.330480 | 3.165965  |
| H | 1.859384  | -1.495597 | 0.935620  |
| H | 0.185592  | -1.060450 | -0.856378 |
| H | -0.614972 | 0.972314  | 0.679685  |
| H | -3.800829 | 3.823304  | 1.268547  |
| H | -2.838409 | 4.451916  | 3.460590  |
| H | -0.768970 | 3.332946  | 4.291355  |
| H | 0.344678  | 1.586631  | 2.896705  |
| H | -5.108048 | 1.986271  | 0.510697  |
| H | -1.401501 | 1.929971  | -4.372799 |
| H | -5.349143 | 2.607432  | -2.463868 |
| H | -5.874355 | 4.697094  | -3.641460 |
| H | -4.319045 | 6.643484  | -3.512433 |
| H | -2.209133 | 6.455758  | -2.193285 |
| H | -1.660094 | 4.343572  | -1.016014 |
| H | -5.995166 | 2.959546  | -7.318475 |
| H | -5.012036 | 5.244330  | -7.535415 |
| H | -2.805014 | 5.737653  | -6.466143 |
| H | -1.626986 | 3.973469  | -5.184021 |
| H | -5.107277 | 0.545087  | -3.012603 |
| H | -3.002495 | -1.682372 | -6.028127 |
| H | -5.068170 | -2.956373 | -6.529015 |
| H | -7.175903 | -2.500330 | -5.265568 |
| H | -5.386119 | 1.071528  | -0.979444 |
| H | -7.177591 | -0.733408 | -3.489931 |
| H | -4.819242 | 1.203709  | -6.042924 |
| H | 1.101702  | -1.661010 | -4.165835 |
| H | 1.331596  | -0.485820 | -2.833814 |
| H | 0.616282  | 0.058343  | -4.368338 |
| H | -1.427779 | -0.625314 | -3.727041 |

Int-4

|   |           |           |           |
|---|-----------|-----------|-----------|
| C | -0.353650 | -5.315715 | -4.440780 |
|---|-----------|-----------|-----------|

|    |           |           |           |
|----|-----------|-----------|-----------|
| C  | -1.604946 | -4.702260 | -4.322919 |
| C  | -1.708323 | -3.371363 | -3.911973 |
| C  | -0.560833 | -2.618662 | -3.590272 |
| C  | 0.697023  | -3.249900 | -3.733904 |
| C  | 0.799411  | -4.575720 | -4.151028 |
| C  | -0.569745 | -1.185080 | -3.267201 |
| C  | -1.720555 | -0.220821 | -2.843599 |
| C  | -3.105276 | -0.471977 | -2.432988 |
| C  | -3.587443 | -1.680765 | -1.888390 |
| C  | -4.918194 | -1.817393 | -1.495917 |
| C  | -5.812607 | -0.745996 | -1.622066 |
| C  | -5.353873 | 0.465275  | -2.151480 |
| C  | -4.022838 | 0.598475  | -2.550854 |
| Ni | -0.244600 | -0.323600 | -1.387400 |
| P  | -0.825165 | 1.504594  | -0.261195 |
| C  | -1.368048 | 2.903751  | -1.364742 |
| C  | -2.545440 | 3.630539  | -1.127382 |
| C  | -2.912866 | 4.680540  | -1.976198 |
| C  | -2.107442 | 5.023650  | -3.064914 |
| C  | -0.927036 | 4.310537  | -3.302436 |
| C  | -0.566354 | 3.255250  | -2.462301 |
| C  | -2.292257 | 1.286118  | 0.859859  |
| C  | -2.178819 | 0.157817  | 1.891721  |
| C  | -2.321479 | -1.253091 | 1.309123  |
| P  | -0.836592 | -1.773991 | 0.305983  |
| C  | -1.146558 | -3.557947 | -0.061239 |
| C  | -2.360289 | -4.207844 | 0.208701  |
| C  | -2.512475 | -5.565987 | -0.092203 |
| C  | -1.454493 | -6.283109 | -0.656902 |
| C  | -0.242027 | -5.638148 | -0.925499 |
| C  | -0.089257 | -4.282532 | -0.636143 |
| C  | 0.396445  | -1.912238 | 1.693909  |
| C  | 1.318292  | -0.882494 | 1.921860  |
| C  | 2.153673  | -0.913294 | 3.043246  |
| C  | 2.086633  | -1.984117 | 3.939494  |
| C  | 1.175220  | -3.022725 | 3.711676  |
| C  | 0.331801  | -2.986230 | 2.597493  |
| C  | 0.476642  | 2.322369  | 0.769501  |
| C  | 1.785963  | 2.352854  | 0.259334  |
| C  | 2.812594  | 2.952521  | 0.992548  |
| C  | 2.546107  | 3.511316  | 2.247424  |
| C  | 1.246459  | 3.474080  | 2.762837  |
| C  | 0.212581  | 2.886490  | 2.027057  |
| H  | -2.488194 | 2.241399  | 1.367657  |
| H  | -1.240104 | 0.244030  | 2.462748  |
| H  | -3.208451 | -1.304477 | 0.660745  |
| H  | 0.309767  | 0.814062  | -2.104658 |
| H  | 1.397494  | -0.065077 | 1.208904  |
| H  | -0.376203 | -3.801064 | 2.432274  |
| H  | 2.863309  | -0.099402 | 3.208506  |



|    |           |           |           |
|----|-----------|-----------|-----------|
| H  | 1.118796  | -3.865226 | 4.404262  |
| H  | 2.742343  | -2.012898 | 4.812307  |
| H  | -3.195060 | -3.668546 | 0.658633  |
| H  | 0.851191  | -3.774739 | -0.861962 |
| H  | -3.461915 | -6.062245 | 0.120110  |
| H  | 0.582873  | -6.189336 | -1.379896 |
| H  | -1.575029 | -7.342591 | -0.892188 |
| H  | 2.007833  | 1.866450  | -0.692846 |
| H  | -0.793629 | 2.873105  | 2.448184  |
| H  | 3.826701  | 2.970036  | 0.587995  |
| H  | 1.032367  | 3.904769  | 3.743154  |
| H  | 3.350901  | 3.969721  | 2.825526  |
| H  | -3.197191 | 3.388977  | -0.288461 |
| H  | 0.348558  | 2.694219  | -2.673108 |
| H  | -3.837067 | 5.228771  | -1.782373 |
| H  | -0.289566 | 4.567489  | -4.150665 |
| H  | -2.397312 | 5.841849  | -3.727080 |
| H  | -2.447466 | -1.983067 | 2.122031  |
| H  | -2.990051 | 0.300823  | 2.622534  |
| H  | -3.143406 | 1.096691  | 0.186886  |
| H  | -5.260250 | -2.767612 | -1.078781 |
| H  | -2.906545 | -2.520060 | -1.759344 |
| H  | -3.674220 | 1.551081  | -2.956302 |
| H  | -6.035567 | 1.312332  | -2.254259 |
| H  | -6.852709 | -0.854855 | -1.309015 |
| H  | -2.690528 | -2.901308 | -3.878482 |
| H  | 1.594389  | -2.677605 | -3.488186 |
| H  | -2.512291 | -5.259914 | -4.566269 |
| H  | 1.784613  | -5.038981 | -4.243410 |
| H  | -0.277193 | -6.356968 | -4.760554 |
| Cl | 2.055629  | -0.899989 | -1.323302 |
| H  | -1.582379 | 0.776198  | -3.270007 |
| H  | 0.212870  | -0.636107 | -3.797252 |

#### TS4

|   |           |           |           |
|---|-----------|-----------|-----------|
| C | -1.922281 | -4.595934 | -0.630556 |
| C | -2.701102 | -3.423534 | -0.644807 |
| C | -3.992240 | -3.463870 | -1.191900 |
| C | -4.502172 | -4.661932 | -1.703852 |
| C | -3.729351 | -5.826091 | -1.677703 |
| C | -2.436635 | -5.789150 | -1.139508 |
| P | -1.937460 | -1.858028 | -0.035354 |
| C | -3.377075 | -0.831474 | 0.548376  |
| C | -2.906693 | 0.470605  | 1.214375  |
| C | -2.424884 | 1.542105  | 0.229184  |
| P | -0.785407 | 1.199602  | -0.596463 |
| C | 0.483392  | 1.713434  | 0.660727  |
| C | 0.269927  | 2.790751  | 1.535593  |
| C | 1.258275  | 3.157113  | 2.454126  |

|    |           |           |           |
|----|-----------|-----------|-----------|
| C  | 2.469495  | 2.457178  | 2.503118  |
| C  | 2.690536  | 1.389701  | 1.626910  |
| C  | 1.700945  | 1.017186  | 0.712500  |
| Ni | -0.454715 | -0.786566 | -1.298053 |
| Cl | 1.113914  | -2.467472 | -1.236806 |
| C  | -1.244505 | -2.377841 | 1.605770  |
| C  | -0.006848 | -1.878128 | 2.029081  |
| C  | 0.478246  | -2.178700 | 3.306283  |
| C  | -0.268951 | -2.989949 | 4.165445  |
| C  | -1.504321 | -3.499376 | 3.744276  |
| C  | -1.992428 | -3.192667 | 2.471563  |
| C  | -0.675480 | 2.571830  | -1.851935 |
| C  | -1.623827 | 3.605487  | -1.926754 |
| C  | -1.489854 | 4.620588  | -2.880948 |
| C  | -0.406124 | 4.622433  | -3.762665 |
| C  | 0.547259  | 3.600290  | -3.688880 |
| C  | 0.409139  | 2.581556  | -2.744963 |
| C  | -1.769776 | -0.469671 | -3.520637 |
| C  | -0.598087 | -1.077518 | -3.897583 |
| C  | -0.300750 | -2.435719 | -4.364749 |
| C  | 0.718474  | -2.597042 | -5.326012 |
| C  | 1.059705  | -3.861521 | -5.811343 |
| C  | 0.406803  | -4.999401 | -5.323724 |
| C  | -0.579740 | -4.856726 | -4.339103 |
| C  | -0.923955 | -3.593635 | -3.861674 |
| C  | -3.178781 | -0.886362 | -3.593602 |
| C  | -4.140258 | -0.050005 | -2.983483 |
| C  | -5.504990 | -0.330494 | -3.049089 |
| C  | -5.954396 | -1.449071 | -3.760461 |
| C  | -5.021247 | -2.263482 | -4.412710 |
| C  | -3.655980 | -1.989353 | -4.331751 |
| H  | -2.366440 | 2.517359  | 0.732845  |
| H  | -2.130256 | 0.259392  | 1.967746  |
| H  | -4.016935 | -0.605686 | -0.317493 |
| H  | 0.636798  | 0.108302  | -1.752975 |
| H  | 0.577201  | -1.264196 | 1.344216  |
| H  | -2.955621 | -3.596188 | 2.151153  |
| H  | 1.443232  | -1.779970 | 3.626882  |
| H  | -2.090254 | -4.136952 | 4.409704  |
| H  | 0.108886  | -3.228464 | 5.161784  |
| H  | -4.608285 | -2.565032 | -1.236884 |
| H  | -0.906000 | -4.563670 | -0.234181 |
| H  | -5.506649 | -4.678401 | -2.131190 |
| H  | -1.823720 | -6.692821 | -1.123118 |
| H  | -4.129899 | -6.759612 | -2.078309 |
| H  | 1.861951  | 0.172314  | 0.037125  |
| H  | -0.660584 | 3.360361  | 1.506784  |
| H  | 3.632430  | 0.838215  | 1.658624  |
| H  | 1.080705  | 3.994358  | 3.132054  |
| H  | 3.239091  | 2.745307  | 3.221973  |

|   |           |           |           |
|---|-----------|-----------|-----------|
| H | -2.476476 | 3.638863  | -1.248333 |
| H | 1.149751  | 1.778144  | -2.705787 |
| H | -2.238811 | 5.413676  | -2.930121 |
| H | 1.397478  | 3.590445  | -4.373822 |
| H | -0.304789 | 5.414833  | -4.506849 |
| H | -3.965339 | -1.435245 | 1.254134  |
| H | -3.758327 | 0.894612  | 1.768981  |
| H | -3.161060 | 1.649636  | -0.581046 |
| H | -5.360028 | -3.126927 | -4.989075 |
| H | -2.953718 | -2.635768 | -4.855390 |
| H | -3.800556 | 0.843068  | -2.454281 |
| H | -6.219350 | 0.330587  | -2.553923 |
| H | -7.020722 | -1.675958 | -3.816832 |
| H | -1.661590 | -3.501396 | -3.066331 |
| H | 1.242766  | -1.713407 | -5.699735 |
| H | -1.073620 | -5.738733 | -3.925193 |
| H | 1.843670  | -3.959797 | -6.565487 |
| H | 0.675416  | -5.990445 | -5.695525 |
| H | -1.667142 | 0.597263  | -3.301450 |
| H | 0.257234  | -0.400083 | -3.977293 |

#### Int-5

|    |           |           |           |
|----|-----------|-----------|-----------|
| C  | 7.300680  | 6.194656  | -4.735324 |
| C  | 6.377142  | 5.614428  | -5.616583 |
| C  | 5.782282  | 6.412861  | -6.610302 |
| C  | 6.108311  | 7.765576  | -6.720933 |
| C  | 7.024775  | 8.340939  | -5.832717 |
| C  | 7.619035  | 7.553254  | -4.842615 |
| P  | 5.835011  | 3.845040  | -5.532709 |
| Ni | 3.705250  | 3.540769  | -5.246370 |
| C  | 3.541177  | 4.808571  | -3.630032 |
| C  | 3.477236  | 6.274194  | -4.059899 |
| C  | 2.828007  | 7.163981  | -3.017582 |
| C  | 3.552048  | 8.179258  | -2.373224 |
| C  | 2.952113  | 8.989279  | -1.401604 |
| C  | 1.609719  | 8.795968  | -1.058932 |
| C  | 0.873630  | 7.789253  | -1.697858 |
| C  | 1.478892  | 6.982526  | -2.665526 |
| C  | 6.468089  | 3.282462  | -7.206520 |
| C  | 6.387013  | 1.773378  | -7.440177 |
| C  | 4.976653  | 1.287053  | -7.776579 |
| P  | 3.682770  | 1.646785  | -6.485966 |
| C  | 2.175781  | 1.141333  | -7.435766 |
| C  | 1.545109  | -0.095376 | -7.246530 |
| C  | 0.436449  | -0.445408 | -8.026309 |
| C  | -0.043197 | 0.433853  | -9.001502 |
| C  | 0.586456  | 1.670138  | -9.193844 |
| C  | 1.684899  | 2.026183  | -8.409356 |
| C  | 3.877090  | 0.337766  | -5.196817 |

|   |           |           |           |
|---|-----------|-----------|-----------|
| C | 4.834741  | -0.684155 | -5.265414 |
| C | 4.982997  | -1.581708 | -4.202634 |
| C | 4.173390  | -1.471532 | -3.068857 |
| C | 3.205086  | -0.462647 | -3.000591 |
| C | 3.062028  | 0.441211  | -4.054025 |
| C | 7.030303  | 2.966620  | -4.429388 |
| C | 6.534585  | 2.032191  | -3.512870 |
| C | 7.410932  | 1.276845  | -2.729647 |
| C | 8.791078  | 1.447813  | -2.860322 |
| C | 9.295096  | 2.371801  | -3.784688 |
| C | 8.420839  | 3.125392  | -4.570383 |
| C | 4.390439  | 4.454655  | -2.469318 |
| C | 4.045264  | 3.328275  | -1.686555 |
| C | 4.806021  | 2.939813  | -0.586543 |
| C | 5.942946  | 3.673557  | -0.222072 |
| C | 6.287983  | 4.806370  | -0.965267 |
| C | 5.519213  | 5.194657  | -2.064692 |
| H | 4.960901  | 0.209828  | -8.000649 |
| H | 6.791613  | 1.234665  | -6.568226 |
| H | 5.902009  | 3.828885  | -7.976597 |
| H | 5.458111  | 1.899371  | -3.410930 |
| H | 8.829545  | 3.832679  | -5.295085 |
| H | 7.008697  | 0.555576  | -2.015703 |
| H | 10.373302 | 2.503958  | -3.896734 |
| H | 9.477620  | 0.859478  | -2.247709 |
| H | 5.038277  | 5.983847  | -7.286544 |
| H | 7.767456  | 5.593345  | -3.955072 |
| H | 5.636082  | 8.374150  | -7.494599 |
| H | 8.334571  | 7.994899  | -4.145986 |
| H | 7.273972  | 9.400844  | -5.912910 |
| H | 2.318258  | 1.240204  | -3.995541 |
| H | 5.480089  | -0.787681 | -6.138738 |
| H | 2.567918  | -0.372171 | -2.118395 |
| H | 5.739384  | -2.367028 | -4.262084 |
| H | 4.295870  | -2.170330 | -2.238843 |
| H | 1.914426  | -0.790583 | -6.489917 |
| H | 2.151960  | 3.005074  | -8.541038 |
| H | -0.050728 | -1.410313 | -7.869918 |
| H | 0.212131  | 2.364354  | -9.949238 |
| H | -0.907579 | 0.159285  | -9.609755 |
| H | 7.511094  | 3.626231  | -7.261667 |
| H | 7.044323  | 1.518742  | -8.286836 |
| H | 4.613029  | 1.801111  | -8.680284 |
| H | 4.516300  | 2.057032  | -0.011254 |
| H | 3.164762  | 2.743974  | -1.968508 |
| H | 5.796860  | 6.092284  | -2.616184 |
| H | 7.161694  | 5.399238  | -0.682823 |
| H | 6.546918  | 3.368707  | 0.635022  |
| H | 4.600730  | 8.339822  | -2.639472 |
| H | 0.899757  | 6.198435  | -3.162012 |

|    |           |          |           |
|----|-----------|----------|-----------|
| H  | 3.534712  | 9.773366 | -0.912345 |
| H  | -0.177424 | 7.635203 | -1.442062 |
| H  | 1.137858  | 9.426068 | -0.302005 |
| H  | 4.472567  | 6.669220 | -4.299398 |
| Cl | 1.436887  | 3.681177 | -5.435870 |
| H  | 2.523953  | 4.458635 | -3.417726 |
| H  | 2.889098  | 6.323333 | -4.990307 |

TS5

|    |           |           |           |
|----|-----------|-----------|-----------|
| C  | 1.705302  | 1.829165  | -2.225058 |
| C  | 0.895884  | 2.495119  | -1.295357 |
| C  | 1.317856  | 3.735391  | -0.785937 |
| C  | 2.530595  | 4.289280  | -1.203622 |
| C  | 3.331030  | 3.616026  | -2.136303 |
| C  | 2.916142  | 2.384302  | -2.647620 |
| P  | -0.686472 | 1.702986  | -0.743937 |
| C  | -1.955920 | 2.998444  | -1.096202 |
| C  | -3.063451 | 3.166570  | -0.247714 |
| C  | -4.054754 | 4.101370  | -0.560692 |
| C  | -3.962951 | 4.862104  | -1.731568 |
| C  | -2.869398 | 4.687337  | -2.587508 |
| C  | -1.871255 | 3.761329  | -2.272027 |
| Ni | -1.074137 | -0.315797 | -1.576176 |
| P  | 0.364608  | -1.321521 | -0.256613 |
| C  | 0.408330  | -0.638380 | 1.484104  |
| C  | 0.616072  | 0.873427  | 1.626833  |
| C  | -0.546603 | 1.726537  | 1.110352  |
| C  | -1.272851 | -1.759705 | -2.991770 |
| C  | -2.537279 | -2.504018 | -3.083520 |
| C  | -2.620165 | -3.716875 | -2.360657 |
| C  | -3.785046 | -4.479842 | -2.342831 |
| C  | -4.901164 | -4.078327 | -3.088642 |
| C  | -4.824832 | -2.903086 | -3.844864 |
| C  | -3.667852 | -2.120795 | -3.835493 |
| C  | -0.844666 | -0.550500 | -3.779115 |
| C  | -1.686390 | 0.221074  | -4.769747 |
| C  | -1.361001 | 0.188136  | -6.134106 |
| C  | -2.043629 | 0.999160  | -7.047994 |
| C  | -3.056920 | 1.856302  | -6.606361 |
| C  | -3.387266 | 1.892327  | -5.245886 |
| C  | -2.702055 | 1.087287  | -4.335212 |
| Cl | -3.289111 | -0.273612 | -0.819698 |
| C  | 0.052270  | -3.104189 | 0.141620  |
| C  | 0.968992  | -4.128592 | -0.137792 |
| C  | 0.659738  | -5.456523 | 0.178295  |
| C  | -0.560353 | -5.770657 | 0.784949  |
| C  | -1.479856 | -4.751634 | 1.063419  |
| C  | -1.183124 | -3.428051 | 0.732001  |
| C  | 2.134994  | -1.306395 | -0.808289 |

|   |           |           |           |
|---|-----------|-----------|-----------|
| C | 3.197229  | -0.898622 | 0.012992  |
| C | 4.498626  | -0.821947 | -0.495575 |
| C | 4.759927  | -1.169280 | -1.823386 |
| C | 3.710988  | -1.597931 | -2.645448 |
| C | 2.410454  | -1.654641 | -2.143339 |
| H | 4.278168  | 4.051776  | -2.460516 |
| H | 2.854235  | 5.251076  | -0.800829 |
| H | 0.699843  | 4.275825  | -0.065320 |
| H | -2.793819 | 5.270928  | -3.507068 |
| H | -1.024454 | 3.630900  | -2.948550 |
| H | 3.533655  | 1.845539  | -3.368936 |
| H | 1.399330  | 0.853645  | -2.601877 |
| H | 5.310667  | -0.487824 | 0.153537  |
| H | 5.775759  | -1.106173 | -2.218307 |
| H | -2.945242 | 1.120653  | -3.269430 |
| H | -4.165076 | 2.570464  | -4.887818 |
| H | -3.577410 | 2.503196  | -7.315736 |
| H | -1.768392 | 0.974693  | -8.104738 |
| H | -0.553248 | -0.461759 | -6.481350 |
| H | -0.506293 | 0.301154  | -3.023487 |
| H | 3.024599  | -0.629782 | 1.055578  |
| H | -4.741518 | 5.587494  | -1.976519 |
| H | -0.435893 | 2.772130  | 1.433822  |
| H | -4.905838 | 4.229728  | 0.111560  |
| H | 0.743272  | 1.090626  | 2.699394  |
| H | -3.164916 | 2.564749  | 0.654991  |
| H | -1.502695 | 1.348415  | 1.501761  |
| H | -0.564390 | -0.920435 | 1.915981  |
| H | 1.930750  | -3.893874 | -0.597191 |
| H | -1.756811 | -4.040405 | -1.777550 |
| H | -3.643365 | -1.207626 | -4.425161 |
| H | -5.678714 | -2.587381 | -4.449203 |
| H | -5.815918 | -4.674681 | -3.082426 |
| H | -3.822345 | -5.394451 | -1.746172 |
| H | -0.796529 | -6.806495 | 1.036709  |
| H | -2.439843 | -4.991595 | 1.525097  |
| H | -1.927127 | -2.644887 | 0.901875  |
| H | 1.381317  | -6.245441 | -0.045125 |
| H | 1.600038  | -1.971335 | -2.802782 |
| H | 3.903549  | -1.876538 | -3.683547 |
| H | 1.553926  | 1.188399  | 1.141411  |
| H | 1.175335  | -1.193318 | 2.044946  |
| H | 0.139133  | -0.760211 | -4.228740 |
| H | -0.442407 | -2.458834 | -2.846259 |

Int-6

|   |          |          |           |
|---|----------|----------|-----------|
| C | 7.130379 | 6.176645 | -4.309332 |
| C | 6.214977 | 5.779921 | -5.296907 |
| C | 5.833249 | 6.700289 | -6.289021 |

|    |           |           |           |
|----|-----------|-----------|-----------|
| C  | 6.354311  | 7.995701  | -6.286957 |
| C  | 7.256790  | 8.389898  | -5.292974 |
| C  | 7.644761  | 7.477123  | -4.306624 |
| P  | 5.510415  | 4.062473  | -5.359503 |
| Ni | 3.431468  | 3.562959  | -4.898768 |
| C  | 3.113982  | 5.125659  | -3.579931 |
| C  | 3.328549  | 6.561764  | -4.024299 |
| C  | 6.068452  | 3.640315  | -7.101457 |
| C  | 6.068184  | 2.153654  | -7.451026 |
| C  | 4.667159  | 1.577895  | -7.634303 |
| P  | 3.566643  | 1.652403  | -6.131830 |
| C  | 2.004296  | 1.076428  | -6.942189 |
| C  | 1.476523  | -0.205510 | -6.749318 |
| C  | 0.311805  | -0.592689 | -7.423017 |
| C  | -0.324765 | 0.293545  | -8.296936 |
| C  | 0.205526  | 1.574807  | -8.495948 |
| C  | 1.360957  | 1.965678  | -7.818054 |
| C  | 4.105281  | 0.243874  | -5.059191 |
| C  | 5.108030  | -0.660336 | -5.440691 |
| C  | 5.528297  | -1.661178 | -4.558256 |
| C  | 4.945116  | -1.775499 | -3.293460 |
| C  | 3.935227  | -0.884667 | -2.912142 |
| C  | 3.524465  | 0.125016  | -3.783696 |
| C  | 6.687156  | 3.068333  | -4.331324 |
| C  | 6.192505  | 2.319393  | -3.257311 |
| C  | 7.048823  | 1.515938  | -2.500452 |
| C  | 8.408908  | 1.456010  | -2.812240 |
| C  | 8.913614  | 2.208994  | -3.880441 |
| C  | 8.058523  | 3.011548  | -4.638249 |
| C  | 3.794720  | 4.712269  | -2.325313 |
| C  | 3.296864  | 3.613599  | -1.581228 |
| C  | 3.934945  | 3.162875  | -0.427209 |
| C  | 5.093390  | 3.800730  | 0.039275  |
| C  | 5.583230  | 4.907486  | -0.659857 |
| C  | 4.941898  | 5.360347  | -1.816342 |
| H  | 4.697326  | 0.537498  | -7.990723 |
| H  | 6.630354  | 1.587827  | -6.691664 |
| H  | 5.416121  | 4.200766  | -7.788697 |
| H  | 5.131065  | 2.365373  | -3.013650 |
| H  | 8.468158  | 3.594292  | -5.465904 |
| H  | 6.645441  | 0.934353  | -1.669505 |
| H  | 9.976843  | 2.169186  | -4.126435 |
| H  | 9.079208  | 0.824495  | -2.225240 |
| H  | 5.105183  | 6.420788  | -7.052644 |
| H  | 7.441685  | 5.470855  | -3.538900 |
| H  | 6.040660  | 8.703313  | -7.056837 |
| H  | 8.352044  | 7.774854  | -3.529800 |
| H  | 7.657977  | 9.405343  | -5.288351 |
| H  | 2.751188  | 0.833586  | -3.479224 |
| H  | 5.576793  | -0.596181 | -6.423413 |

|    |           |           |           |
|----|-----------|-----------|-----------|
| H  | 3.474465  | -0.967731 | -1.925522 |
| H  | 6.316472  | -2.352479 | -4.863719 |
| H  | 5.277536  | -2.555206 | -2.605084 |
| H  | 1.967481  | -0.904031 | -6.069001 |
| H  | 1.757211  | 2.974885  | -7.960833 |
| H  | -0.096352 | -1.593106 | -7.263385 |
| H  | -0.286621 | 2.272508  | -9.176975 |
| H  | -1.233008 | -0.010655 | -8.821343 |
| H  | 7.079799  | 4.057846  | -7.204602 |
| H  | 6.618049  | 2.026562  | -8.397274 |
| H  | 4.126525  | 2.154262  | -8.401343 |
| H  | 3.528726  | 2.303801  | 0.112466  |
| H  | 2.403695  | 3.102429  | -1.947473 |
| H  | 5.345132  | 6.231877  | -2.331434 |
| H  | 6.475085  | 5.428107  | -0.301850 |
| H  | 5.600569  | 3.442759  | 0.937589  |
| H  | 4.398022  | 6.808977  | -4.085959 |
| Cl | 1.275085  | 2.866066  | -4.419858 |
| H  | 2.037438  | 4.938418  | -3.486291 |
| C  | 2.700285  | 6.994168  | -5.333456 |
| C  | 2.053851  | 6.110729  | -6.210295 |
| C  | 2.807694  | 8.343101  | -5.720400 |
| C  | 1.550566  | 6.551374  | -7.441275 |
| H  | 1.945602  | 5.058306  | -5.931035 |
| C  | 2.307136  | 8.789434  | -6.944880 |
| H  | 3.312998  | 9.048664  | -5.054830 |
| C  | 1.677332  | 7.891156  | -7.817350 |
| H  | 1.054617  | 5.840472  | -8.107332 |
| H  | 2.412901  | 9.840412  | -7.223902 |
| H  | 1.287681  | 8.235827  | -8.777662 |
| H  | 2.935654  | 7.224257  | -3.226206 |

#### TS6

|    |           |          |            |
|----|-----------|----------|------------|
| C  | 0.408419  | 4.189431 | -4.482826  |
| C  | 0.779202  | 3.063315 | -5.237327  |
| C  | -0.171783 | 2.050508 | -5.465302  |
| C  | -1.467870 | 2.169105 | -4.962619  |
| C  | -1.831379 | 3.293730 | -4.209450  |
| C  | -0.890536 | 4.301600 | -3.973481  |
| P  | 2.520855  | 2.739521 | -5.747672  |
| C  | 2.352382  | 2.187814 | -7.513135  |
| C  | 1.658695  | 2.974539 | -8.448317  |
| C  | 1.615830  | 2.592190 | -9.791331  |
| C  | 2.264503  | 1.422946 | -10.210952 |
| C  | 2.949977  | 0.635392 | -9.281860  |
| C  | 2.992853  | 1.015478 | -7.936121  |
| Ni | 3.947795  | 1.519265 | -4.637117  |
| P  | 5.936189  | 2.124240 | -5.237304  |
| C  | 5.890879  | 3.947217 | -5.640923  |



|    |           |           |            |
|----|-----------|-----------|------------|
| C  | 4.726843  | 4.384089  | -6.560336  |
| C  | 3.303134  | 4.429474  | -5.962858  |
| Cl | 3.569996  | -0.697123 | -4.708137  |
| C  | 6.483688  | 1.313479  | -6.815499  |
| C  | 6.363109  | -0.083482 | -6.911655  |
| C  | 6.718656  | -0.743492 | -8.089833  |
| C  | 7.181314  | -0.015042 | -9.192257  |
| C  | 7.300431  | 1.374988  | -9.103543  |
| C  | 6.956807  | 2.038580  | -7.920703  |
| C  | 7.374036  | 1.903798  | -4.094541  |
| C  | 7.239004  | 0.925182  | -3.097661  |
| C  | 8.273111  | 0.700508  | -2.184792  |
| C  | 9.442547  | 1.465824  | -2.254172  |
| C  | 9.580006  | 2.444898  | -3.245719  |
| C  | 8.552609  | 2.661042  | -4.169277  |
| C  | 2.696959  | 2.257530  | -1.927566  |
| C  | 2.077111  | 0.971800  | -1.627367  |
| C  | 2.735814  | -0.065965 | -0.934458  |
| C  | 2.069578  | -1.248719 | -0.622464  |
| C  | 0.730301  | -1.429761 | -0.995797  |
| C  | 0.067599  | -0.415979 | -1.696510  |
| C  | 0.733951  | 0.768810  | -2.008454  |
| C  | 3.971732  | 2.644749  | -1.651535  |
| C  | 4.509568  | 3.993063  | -1.840009  |
| C  | 3.690067  | 5.112636  | -2.111657  |
| C  | 4.239828  | 6.383160  | -2.273360  |
| C  | 5.623497  | 6.576937  | -2.161244  |
| C  | 6.449841  | 5.481407  | -1.886914  |
| C  | 5.899971  | 4.208234  | -1.724628  |
| H  | 2.659275  | 5.040564  | -6.612909  |
| H  | 4.719212  | 3.774140  | -7.477675  |
| H  | 5.820009  | 4.451771  | -4.664392  |
| H  | 5.951328  | -0.647662 | -6.071365  |
| H  | 7.060886  | 3.123218  | -7.877572  |
| H  | 6.616776  | -1.828945 | -8.154152  |
| H  | 7.659322  | 1.951169  | -9.959169  |
| H  | 7.443267  | -0.529000 | -10.119483 |
| H  | 8.678046  | 3.422925  | -4.941659  |
| H  | 6.308890  | 0.352179  | -3.040706  |
| H  | 10.492703 | 3.041903  | -3.301138  |
| H  | 8.161242  | -0.064315 | -1.413471  |
| H  | 10.247496 | 1.299969  | -1.535296  |
| H  | 3.526706  | 0.404588  | -7.205850  |
| H  | 1.148969  | 3.887541  | -8.131273  |
| H  | 3.459152  | -0.276254 | -9.602035  |
| H  | 1.077917  | 3.209706  | -10.513883 |
| H  | 2.234064  | 1.129539  | -11.262414 |
| H  | 0.108179  | 1.162375  | -6.036883  |
| H  | 1.125068  | 4.990661  | -4.291955  |
| H  | -2.195663 | 1.377202  | -5.152235  |

|   |           |           |           |
|---|-----------|-----------|-----------|
| H | -1.167193 | 5.183386  | -3.391855 |
| H | -2.843492 | 3.382394  | -3.810149 |
| H | 6.843799  | 4.260117  | -6.092181 |
| H | 4.960798  | 5.409495  | -6.888204 |
| H | 3.328132  | 4.904553  | -4.970029 |
| H | 2.593775  | -2.035302 | -0.075125 |
| H | 3.775745  | 0.057554  | -0.625261 |
| H | 0.214621  | 1.556141  | -2.560748 |
| H | -0.974696 | -0.547273 | -1.995794 |
| H | 0.208290  | -2.353487 | -0.737934 |
| H | 4.162517  | 2.845537  | -4.152416 |
| H | 2.606713  | 4.991674  | -2.171846 |
| H | 6.554165  | 3.357416  | -1.520486 |
| H | 3.583350  | 7.233439  | -2.470556 |
| H | 7.529158  | 5.620144  | -1.794840 |
| H | 6.049438  | 7.575672  | -2.274927 |
| H | 4.678747  | 1.917821  | -1.240949 |
| H | 2.016429  | 2.985752  | -2.379814 |

TS6'

|    |           |           |           |
|----|-----------|-----------|-----------|
| C  | 0.228793  | 4.345118  | -5.765963 |
| C  | 0.859121  | 3.148068  | -6.120945 |
| C  | 0.144629  | 1.945714  | -6.095712 |
| C  | -1.205187 | 1.910863  | -5.715137 |
| C  | -1.828510 | 3.123108  | -5.375647 |
| C  | -1.121606 | 4.326552  | -5.397135 |
| C  | -1.972954 | 0.606654  | -5.695616 |
| C  | -2.791059 | 0.361938  | -4.425557 |
| Ni | -1.877695 | 0.503017  | -1.905122 |
| O  | -0.676259 | -1.013159 | -3.111091 |
| C  | 0.629135  | -0.801871 | -3.665905 |
| C  | -3.980993 | -0.445904 | -4.533505 |
| C  | -4.134883 | -1.475450 | -5.507069 |
| C  | -5.312405 | -2.216308 | -5.611020 |
| C  | -6.399158 | -1.976009 | -4.758670 |
| C  | -6.275936 | -0.967064 | -3.787003 |
| C  | -5.100352 | -0.231956 | -3.678346 |
| Cl | -0.356570 | 2.093750  | -2.268529 |
| P  | -2.982634 | 1.861067  | -0.608240 |
| C  | -4.627022 | 1.273506  | 0.037708  |
| C  | -4.550854 | -0.073753 | 0.760324  |
| C  | -4.330275 | -1.264766 | -0.178907 |
| P  | -2.664583 | -1.316250 | -0.992380 |
| C  | -1.463820 | -1.654699 | 0.380627  |
| C  | -0.107228 | -1.349464 | 0.173529  |
| C  | 0.834222  | -1.586304 | 1.177202  |
| C  | 0.427863  | -2.113605 | 2.407590  |
| C  | -0.919893 | -2.419164 | 2.620678  |
| C  | -1.862619 | -2.198921 | 1.610643  |

|   |           |           |           |
|---|-----------|-----------|-----------|
| C | -3.417889 | 3.419064  | -1.503874 |
| C | -2.575385 | 4.539314  | -1.414605 |
| C | -2.857799 | 5.692511  | -2.148961 |
| C | -3.974862 | 5.738941  | -2.990150 |
| C | -4.814362 | 4.625301  | -3.087539 |
| C | -4.536668 | 3.470610  | -2.350488 |
| C | -2.135674 | 2.421012  | 0.935798  |
| C | -0.883181 | 1.888073  | 1.263051  |
| C | -0.258003 | 2.244472  | 2.461423  |
| C | -0.877722 | 3.145887  | 3.332127  |
| C | -2.124319 | 3.692605  | 3.001894  |
| C | -2.754540 | 3.331487  | 1.808799  |
| C | -2.705218 | -2.922522 | -1.913500 |
| C | -1.555831 | -3.729575 | -1.966744 |
| C | -1.579320 | -4.945707 | -2.649765 |
| C | -2.746950 | -5.367976 | -3.298578 |
| C | -3.886100 | -4.561260 | -3.261399 |
| C | -3.867370 | -3.341351 | -2.577482 |
| H | -0.639128 | -3.409453 | -1.471882 |
| H | -4.798659 | -4.868265 | -3.776102 |
| H | -2.763961 | -6.319811 | -3.833633 |
| H | -0.681010 | -5.566170 | -2.676487 |
| H | -4.764255 | -2.722647 | -2.587070 |
| H | -5.063369 | -1.237170 | -1.000161 |
| H | -4.479817 | -2.218211 | 0.347974  |
| H | -5.504248 | -0.233480 | 1.286884  |
| H | -3.773565 | -0.043182 | 1.541912  |
| H | -2.906382 | -2.454950 | 1.797861  |
| H | -1.243975 | -2.831513 | 3.578293  |
| H | 1.159893  | -2.285761 | 3.199109  |
| H | 1.884403  | -1.343950 | 1.002156  |
| H | 0.202314  | -0.911201 | -0.777220 |
| H | -0.404481 | 1.195448  | 0.571316  |
| H | -3.723409 | 3.770565  | 1.559514  |
| H | -2.607836 | 4.402961  | 3.675578  |
| H | -0.390879 | 3.426067  | 4.268544  |
| H | 0.714504  | 1.816342  | 2.713158  |
| H | -5.007892 | 2.055470  | 0.710309  |
| H | -5.205541 | 2.614777  | -2.450668 |
| H | -5.689269 | 4.649702  | -3.740294 |
| H | -4.189394 | 6.639479  | -3.568867 |
| H | -2.195618 | 6.557232  | -2.069719 |
| H | -1.693364 | 4.506386  | -0.774673 |
| H | -5.021991 | 0.553913  | -2.924462 |
| H | -3.305062 | -1.702869 | -6.180220 |
| H | -5.381932 | -3.003426 | -6.366886 |
| H | -7.318178 | -2.558403 | -4.845665 |
| H | -5.325494 | 1.208525  | -0.809530 |
| H | -7.110168 | -0.752821 | -3.112938 |
| H | 1.365667  | -1.180239 | -2.943055 |

|   |           |           |           |
|---|-----------|-----------|-----------|
| H | 0.820643  | 0.265556  | -3.850126 |
| H | 0.734211  | -1.370807 | -4.604328 |
| H | -1.417477 | -0.627231 | -3.713639 |
| H | 0.647153  | 1.012406  | -6.363947 |
| H | -2.875788 | 3.123406  | -5.064463 |
| H | 1.912681  | 3.147801  | -6.410870 |
| H | -1.624316 | 5.252478  | -5.108773 |
| H | 0.785623  | 5.284950  | -5.774950 |
| H | -1.265808 | -0.213100 | -5.919408 |
| H | -2.666834 | 0.610421  | -6.563786 |
| H | -2.947651 | 1.279286  | -3.838929 |

Pdt'

|   |           |           |           |
|---|-----------|-----------|-----------|
| C | -2.226434 | 0.308867  | -0.020486 |
| H | -1.923540 | 0.868004  | -0.920232 |
| H | -3.325945 | 0.249317  | -0.028440 |
| C | -1.778107 | 1.120240  | 1.225140  |
| H | -2.186370 | 2.139534  | 1.135752  |
| H | -0.680440 | 1.206940  | 1.215166  |
| C | -1.638327 | -1.080898 | -0.058007 |
| C | -2.362861 | -2.187427 | 0.412536  |
| C | -0.326322 | -1.289640 | -0.515418 |
| C | -1.796401 | -3.466123 | 0.427018  |
| H | -3.383044 | -2.042010 | 0.777353  |
| C | 0.245545  | -2.565413 | -0.502899 |
| H | 0.253915  | -0.440385 | -0.887669 |
| C | -0.488677 | -3.659935 | -0.030214 |
| H | -2.378236 | -4.313418 | 0.797260  |
| H | 1.265574  | -2.707190 | -0.867753 |
| H | -0.044161 | -4.657655 | -0.020894 |
| C | -2.229439 | 0.498944  | 2.524586  |
| C | -3.539793 | 0.693100  | 2.992506  |
| C | -1.372600 | -0.329285 | 3.266607  |
| C | -3.981982 | 0.079347  | 4.168484  |
| H | -4.220369 | 1.336354  | 2.427346  |
| C | -1.808658 | -0.945289 | 4.444162  |
| H | -0.353048 | -0.497028 | 2.910551  |
| C | -3.115999 | -0.743038 | 4.899639  |
| H | -5.003591 | 0.245714  | 4.517913  |
| H | -1.126273 | -1.586251 | 5.007450  |
| H | -3.458135 | -1.220591 | 5.820304  |

---
